# Supplementary material for: Signature of microRNA expression during osteogenic differentiation of bone marrow MSCs reveals a putative role of miR-335-5p in osteoarthritis
Source: PubMed Central journal article supplement (PMC4526194; doi:10.1186/s12891-015-0652-9), 2015-08-05
Supplement: 12891_2015_652_MOESM5_ESM.pdf [file 12891_2015_652_MOESM5_ESM.pdf]

| List 1: Control vs OA; List 2: Globally t=(0-21); List 3: Differential miRNAs in Osteoarthritis t= (0-21) |                                    |                  |                                                                                  |                                                                                                          |
|-----------------------------------------------------------------------------------------------------------|------------------------------------|------------------|----------------------------------------------------------------------------------|----------------------------------------------------------------------------------------------------------|
| Common                                                                                                    | Unique in List 1                   | Unique in List 2 | Unique in List 3                                                                 | List 2- List 3                                                                                           |
| hsa-miR-210                                                                                               | hsa-miR-181a-5p<br>hsa-miR-193b-3p | hsa-miR-27b-3p   | hsa-miR-539-5p<br>hsa-miR-628-5p<br>hsa-miR-433<br>hsa-miR-138-5p<br>hsa-miR-370 | hsa-miR-197-3p<br>hsa-miR-222-3p<br>hsa-miR-296-5p<br>hsa-miR-335-5p<br>hsa-miR-628-3p<br>hsa-miR-379-3p |

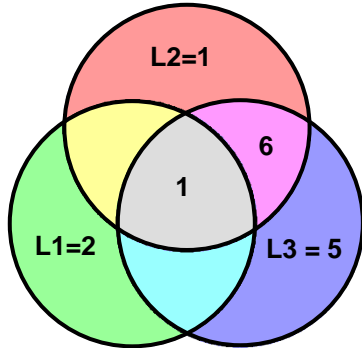

| List 1: Control vs OA; List 2: Globally t=(10-21); List 3: Differential miRNAs in Osteoarthritis MSCs t= (10-21) |                  |                  |                  |                                                                                                                 |
|------------------------------------------------------------------------------------------------------------------|------------------|------------------|------------------|-----------------------------------------------------------------------------------------------------------------|
| Common                                                                                                           | Unique in List 1 | Unique in List 2 | Unique in List 3 | List 2- List 3                                                                                                  |
|                                                                                                                  |                  | hsa-miR-296-5p   |                  | hsa-miR-222<br>hsa-miR-24-2-5p<br>hsa-miR-27b-3p<br>hsa-miR-335-5p<br>hsa-miR-370<br>hsa-miR-410<br>hsa-miR-543 |

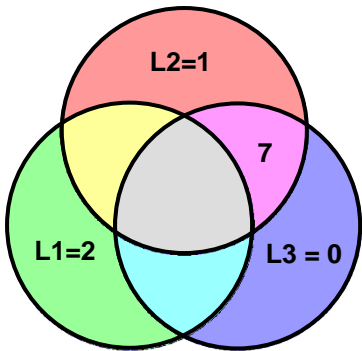

Differential miRNAs between days 0-21 (List 1) and 10-21 (List 2) in MSCs (Globally)

| Common                                                               | Unique in List 1                                                  | Unique in List 2                                                            |
|----------------------------------------------------------------------|-------------------------------------------------------------------|-----------------------------------------------------------------------------|
| hsa-miR-222-3p<br>hsa-miR-27b-3p<br>hsa-miR-296-5p<br>hsa-miR-335-5p | hsa-miR-197-3p<br>hsa-miR-210<br>hsa-miR-497-5p<br>hsa-miR-628-3p | hsa-miR-24-2-5p<br>hsa-miR-370<br>hsa-miR-410<br>hsa-miR-543<br>hsa-miR-134 |

Differential miRNAs between days 0-21 (List 1) and 10-21 (List 2) in Osteoarthritis MSCs

| Common                                                                        | Unique in List 1                                                                                                        | Unique in List 2                                                               |
|-------------------------------------------------------------------------------|-------------------------------------------------------------------------------------------------------------------------|--------------------------------------------------------------------------------|
| hsa-miR-222<br>hsa-miR-335-5p<br>hsa-miR-370<br>hsa-miR-433<br>hsa-miR-379-3p | hsa-miR-197-3p<br>hsa-miR-210<br>hsa-miR-296-5p<br>hsa-miR-497-5p<br>hsa-miR-539-5p<br>hsa-miR-628-3p<br>hsa-miR-628-5p | hsa-miR-24-2-5p<br>hsa-miR-27b-3p<br>hsa-miR-410<br>hsa-miR-543<br>hsa-miR-134 |

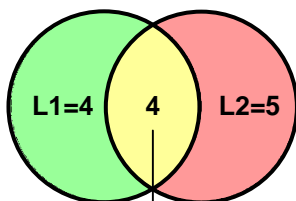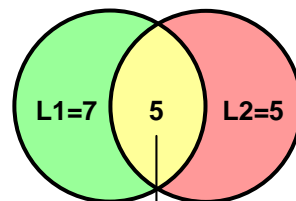

hsa-miR-222  
hsa-miR-335-5p  
hsa-miR-379-3p
