# Supplementary material for: Signature of microRNA expression during osteogenic differentiation of bone marrow MSCs reveals a putative role of miR-335-5p in osteoarthritis
Source: BMC Musculoskelet Disord. 2015 Aug 5;16:182. doi: 10.1186/s12891-015-0652-9 (PMC4526194; doi:10.1186/s12891-015-0652-9)
Supplement: Additional file 1: — Data analysis of the expression profile of miRNA sequences, from the Sanger miRBase v14 using the Taqman OpenArray MicroRNA pools A and B. (XLS 2463 kb) [file 12891_2015_652_MOESM1_ESM.xls]

## Sheet: Sample Design
Sample Name	Group	TUBE	CELLS	DIFFERENTIATION
MSC1		1	FS4-M
MSC10		2	FS4-C
MSC11		3	FS1-S
MSC12		4	CX1-S
MSC13		5	CX23-M
MSC14		6	FS15-M	BASAL
MSC15		7	FS15-M	10 DAYS
MSC16		8	FS15-M	21 DAYS
MSC17		9	FS17-M	BASAL
MSC18		10	FS17-M	10 DAYS
MSC19		11	FS17-M	21 DAYS
MSC2		12	FS22-M	BASAL
MSC20		13	FS22-M	10 DAYS
MSC21		14	FS22-M	21 DAYS
MSC22		15	CX1-M	BASAL
MSC23		16	CX1-M	10 DAYS
MSC24		17	CX1-M	21 DAYS
MSC25		18	CX17-M	BASAL
MSC26		19	CX17-M	10 DAYS
MSC27		20	CX17-M	21 DAYS
MSC28		21	CX18-M	BASAL
MSC29		22	CX18-M	10 DAYS
MSC3		23	CX18-M	21 DAYS
MSC4		24	CX19-M	BASAL
MSC5		25	CX19-M	10 DAYS
MSC6		26	CX19-M	21 DAYS
MSC7		27	CX25-M	BASAL
MSC8		28	CX25-M	10 DAYS
MSC9		29	CX25-M	21 DAYS

## Sheet: Assay Design
Assay Name	Type
HSA-MIR-1179	Target
HSA-MIR-1180	Target
HSA-MIR-1183	Target
HSA-MIR-1184	Target
HSA-MIR-1201	Target
HSA-MIR-1208	Target
HSA-MIR-1225-3P	Target
HSA-MIR-1226#	Target
HSA-MIR-1227	Target
HSA-MIR-1233	Target
HSA-MIR-1243	Target
HSA-MIR-1244	Target
HSA-MIR-1247	Target
HSA-MIR-1248	Target
HSA-MIR-1249	Target
HSA-MIR-1250	Target
HSA-MIR-1254	Target
HSA-MIR-1255A	Target
HSA-MIR-1255B	Target
HSA-MIR-1256	Target
HSA-MIR-1260	Target
HSA-MIR-1262	Target
HSA-MIR-1267	Target
HSA-MIR-1269	Target
HSA-MIR-1270	Target
HSA-MIR-1271	Target
HSA-MIR-1274A	Target
HSA-MIR-1274B	Target
HSA-MIR-1275	Target
HSA-MIR-1276	Target
HSA-MIR-1282	Target
HSA-MIR-1285	Target
HSA-MIR-1289	Target
HSA-MIR-1290	Target
HSA-MIR-1291	Target
HSA-MIR-1293	Target
HSA-MIR-1300	Target
HSA-MIR-1303	Target
HSA-MIR-1305	Target
HSA-MIR-1324	Target
HSA-MIR-151-5P	Target
HSA-MIR-191#	Target
HSA-MIR-320B	Target
HSA-MIR-520D-3P	Target
HSA-MIR-548E	Target
HSA-MIR-548J	Target
HSA-MIR-548K	Target
HSA-MIR-548L	Target
HSA-MIR-577	Target
HSA-MIR-590-3P	Target
HSA-MIR-663B	Target
HSA-MIR-664	Target
HSA-MIR-720	Target
HSA-MIR-765	Target
RNU44	Candidate Control
RNU48	Selected Control
U6 rRNA	Candidate Control
ath-miR159a	Candidate Control
dme-miR-7	Candidate Control
hsa-let-7a	Target
hsa-let-7a#	Target
hsa-let-7b	Target
hsa-let-7c	Target
hsa-let-7d	Target
hsa-let-7e	Target
hsa-let-7e#	Target
hsa-let-7f	Target
hsa-let-7f-1#	Target
hsa-let-7f-2#	Target
hsa-let-7g	Target
hsa-let-7g#	Target
hsa-miR-100	Target
hsa-miR-100#	Target
hsa-miR-101	Target
hsa-miR-101#	Target
hsa-miR-103	Target
hsa-miR-106a	Target
hsa-miR-106b	Target
hsa-miR-106b#	Target
hsa-miR-107	Target
hsa-miR-10a	Target
hsa-miR-10a#	Target
hsa-miR-10b	Target
hsa-miR-10b#	Target
hsa-miR-122	Target
hsa-miR-125a-3p	Target
hsa-miR-125a-5p	Target
hsa-miR-125b	Target
hsa-miR-125b-1#	Target
hsa-miR-125b-2#	Target
hsa-miR-126	Target
hsa-miR-126#	Target
hsa-miR-127	Target
hsa-miR-127-5p	Target
hsa-miR-128a	Target
hsa-miR-129	Target
hsa-miR-129#	Target
hsa-miR-130a	Target
hsa-miR-130b	Target
hsa-miR-130b#	Target
hsa-miR-132	Target
hsa-miR-132#	Target
hsa-miR-133a	Target
hsa-miR-135a	Target
hsa-miR-135b	Target
hsa-miR-136	Target
hsa-miR-136#	Target
hsa-miR-138	Target
hsa-miR-139-5p	Target
hsa-miR-140-3p	Target
hsa-miR-141	Target
hsa-miR-142-3p	Target
hsa-miR-142-5p	Target
hsa-miR-143	Target
hsa-miR-144#	Target
hsa-miR-145	Target
hsa-miR-145#	Target
hsa-miR-146a	Target
hsa-miR-146b	Target
hsa-miR-146b-3p	Target
hsa-miR-148a	Target
hsa-miR-148b	Target
hsa-miR-148b#	Target
hsa-miR-149	Target
hsa-miR-150	Target
hsa-miR-151-3p	Target
hsa-miR-152	Target
hsa-miR-154	Target
hsa-miR-154#	Target
hsa-miR-155	Target
hsa-miR-155#	Target
hsa-miR-15a	Target
hsa-miR-15a#	Target
hsa-miR-15b	Target
hsa-miR-15b#	Target
hsa-miR-16	Target
hsa-miR-16-1#	Target
hsa-miR-17	Target
hsa-miR-17#	Target
hsa-miR-181a	Target
hsa-miR-181a-2#	Target
hsa-miR-181c	Target
hsa-miR-181c#	Target
hsa-miR-184	Target
hsa-miR-185	Target
hsa-miR-186	Target
hsa-miR-18a	Target
hsa-miR-18a#	Target
hsa-miR-190	Target
hsa-miR-190b	Target
hsa-miR-191	Target
hsa-miR-192	Target
hsa-miR-192#	Target
hsa-miR-193a-3p	Target
hsa-miR-193a-5p	Target
hsa-miR-193b	Target
hsa-miR-193b#	Target
hsa-miR-194	Target
hsa-miR-195	Target
hsa-miR-195#	Target
hsa-miR-196b	Target
hsa-miR-197	Target
hsa-miR-198	Target
hsa-miR-199a	Target
hsa-miR-199a-3p	Target
hsa-miR-199b	Target
hsa-miR-19a	Target
hsa-miR-19b	Target
hsa-miR-19b-1#	Target
hsa-miR-200a#	Target
hsa-miR-200b	Target
hsa-miR-200c	Target
hsa-miR-202	Target
hsa-miR-203	Target
hsa-miR-204	Target
hsa-miR-205	Target
hsa-miR-206	Target
hsa-miR-208	Target
hsa-miR-20a	Target
hsa-miR-20a#	Target
hsa-miR-20b	Target
hsa-miR-21	Target
hsa-miR-21#	Target
hsa-miR-210	Target
hsa-miR-211	Target
hsa-miR-212	Target
hsa-miR-213	Target
hsa-miR-214	Target
hsa-miR-214#	Target
hsa-miR-215	Target
hsa-miR-216a	Target
hsa-miR-216b	Target
hsa-miR-217	Target
hsa-miR-218	Target
hsa-miR-218-2#	Target
hsa-miR-219	Target
hsa-miR-219-1-3p	Target
hsa-miR-22	Target
hsa-miR-22#	Target
hsa-miR-221	Target
hsa-miR-221#	Target
hsa-miR-222	Target
hsa-miR-222#	Target
hsa-miR-223	Target
hsa-miR-224	Target
hsa-miR-23a	Target
hsa-miR-23a#	Target
hsa-miR-23b	Target
hsa-miR-24	Target
hsa-miR-24-1#	Target
hsa-miR-24-2#	Target
hsa-miR-25	Target
hsa-miR-25#	Target
hsa-miR-26a	Target
hsa-miR-26a-1#	Target
hsa-miR-26a-2#	Target
hsa-miR-26b	Target
hsa-miR-26b#	Target
hsa-miR-27a	Target
hsa-miR-27a#	Target
hsa-miR-27b	Target
hsa-miR-27b#	Target
hsa-miR-28	Target
hsa-miR-28-3p	Target
hsa-miR-296	Target
hsa-miR-296-3p	Target
hsa-miR-298	Target
hsa-miR-299-3p	Target
hsa-miR-299-5p	Target
hsa-miR-29a	Target
hsa-miR-29a#	Target
hsa-miR-29b	Target
hsa-miR-29b-1#	Target
hsa-miR-29b-2#	Target
hsa-miR-29c	Target
hsa-miR-301	Target
hsa-miR-301b	Target
hsa-miR-302a	Target
hsa-miR-302a#	Target
hsa-miR-302b	Target
hsa-miR-302c	Target
hsa-miR-302d	Target
hsa-miR-30a-3p	Target
hsa-miR-30a-5p	Target
hsa-miR-30b	Target
hsa-miR-30c	Target
hsa-miR-30d	Target
hsa-miR-30d#	Target
hsa-miR-30e-3p	Target
hsa-miR-31	Target
hsa-miR-31#	Target
hsa-miR-32	Target
hsa-miR-320	Target
hsa-miR-323-3p	Target
hsa-miR-324-3p	Target
hsa-miR-324-5p	Target
hsa-miR-326	Target
hsa-miR-328	Target
hsa-miR-329	Target
hsa-miR-330	Target
hsa-miR-331	Target
hsa-miR-331-5p	Target
hsa-miR-335	Target
hsa-miR-335#	Target
hsa-miR-337-3p	Target
hsa-miR-337-5p	Target
hsa-miR-339-3p	Target
hsa-miR-339-5p	Target
hsa-miR-33a#	Target
hsa-miR-340	Target
hsa-miR-340#	Target
hsa-miR-342-3p	Target
hsa-miR-345	Target
hsa-miR-34a	Target
hsa-miR-34a#	Target
hsa-miR-34b	Target
hsa-miR-34c	Target
hsa-miR-361	Target
hsa-miR-361-3p	Target
hsa-miR-362	Target
hsa-miR-362-3p	Target
hsa-miR-363	Target
hsa-miR-363#	Target
hsa-miR-365	Target
hsa-miR-367	Target
hsa-miR-369-3p	Target
hsa-miR-369-5p	Target
hsa-miR-370	Target
hsa-miR-372	Target
hsa-miR-373	Target
hsa-miR-374	Target
hsa-miR-374a#	Target
hsa-miR-374b#	Target
hsa-miR-375	Target
hsa-miR-376a	Target
hsa-miR-376a#	Target
hsa-miR-376b	Target
hsa-miR-376c	Target
hsa-miR-377	Target
hsa-miR-377#	Target
hsa-miR-378	Target
hsa-miR-380-5p	Target
hsa-miR-381	Target
hsa-miR-382	Target
hsa-miR-383	Target
hsa-miR-409-3p	Target
hsa-miR-409-5p	Target
hsa-miR-410	Target
hsa-miR-411	Target
hsa-miR-411#	Target
hsa-miR-422a	Target
hsa-miR-423-5p	Target
hsa-miR-424	Target
hsa-miR-424#	Target
hsa-miR-425#	Target
hsa-miR-425-5p	Target
hsa-miR-429	Target
hsa-miR-431	Target
hsa-miR-431#	Target
hsa-miR-432	Target
hsa-miR-433	Target
hsa-miR-449	Target
hsa-miR-449b	Target
hsa-miR-450a	Target
hsa-miR-450b-5p	Target
hsa-miR-452	Target
hsa-miR-452#	Target
hsa-miR-453	Target
hsa-miR-454	Target
hsa-miR-454#	Target
hsa-miR-455	Target
hsa-miR-455-3p	Target
hsa-miR-483-3p	Target
hsa-miR-483-5p	Target
hsa-miR-484	Target
hsa-miR-485-3p	Target
hsa-miR-485-5p	Target
hsa-miR-486	Target
hsa-miR-486-3p	Target
hsa-miR-487a	Target
hsa-miR-487b	Target
hsa-miR-489	Target
hsa-miR-493	Target
hsa-miR-494	Target
hsa-miR-497	Target
hsa-miR-500	Target
hsa-miR-501-3p	Target
hsa-miR-502	Target
hsa-miR-502-3p	Target
hsa-miR-505	Target
hsa-miR-505#	Target
hsa-miR-508	Target
hsa-miR-509-5p	Target
hsa-miR-511	Target
hsa-miR-512-3p	Target
hsa-miR-512-5p	Target
hsa-miR-516-3p	Target
hsa-miR-517c	Target
hsa-miR-518b	Target
hsa-miR-518d-5p	Target
hsa-miR-518e	Target
hsa-miR-519a	Target
hsa-miR-519b-3p	Target
hsa-miR-519d	Target
hsa-miR-520b	Target
hsa-miR-520c-3p	Target
hsa-miR-520e	Target
hsa-miR-520f	Target
hsa-miR-524	Target
hsa-miR-526b	Target
hsa-miR-532	Target
hsa-miR-532-3p	Target
hsa-miR-539	Target
hsa-miR-541	Target
hsa-miR-542-3p	Target
hsa-miR-542-5p	Target
hsa-miR-543	Target
hsa-miR-544	Target
hsa-miR-545	Target
hsa-miR-545#	Target
hsa-miR-548a	Target
hsa-miR-548b	Target
hsa-miR-548b-5p	Target
hsa-miR-548c	Target
hsa-miR-548c-5p	Target
hsa-miR-548d	Target
hsa-miR-548d-5p	Target
hsa-miR-550	Target
hsa-miR-551b	Target
hsa-miR-551b#	Target
hsa-miR-564	Target
hsa-miR-567	Target
hsa-miR-570	Target
hsa-miR-572	Target
hsa-miR-574-3p	Target
hsa-miR-576-3p	Target
hsa-miR-576-5p	Target
hsa-miR-578	Target
hsa-miR-579	Target
hsa-miR-589	Target
hsa-miR-590-5p	Target
hsa-miR-591	Target
hsa-miR-592	Target
hsa-miR-597	Target
hsa-miR-598	Target
hsa-miR-601	Target
hsa-miR-604	Target
hsa-miR-605	Target
hsa-miR-613	Target
hsa-miR-615-5p	Target
hsa-miR-616	Target
hsa-miR-618	Target
hsa-miR-622	Target
hsa-miR-624	Target
hsa-miR-625	Target
hsa-miR-625#	Target
hsa-miR-627	Target
hsa-miR-628-3p	Target
hsa-miR-628-5p	Target
hsa-miR-629	Target
hsa-miR-630	Target
hsa-miR-631	Target
hsa-miR-634	Target
hsa-miR-635	Target
hsa-miR-636	Target
hsa-miR-638	Target
hsa-miR-639	Target
hsa-miR-641	Target
hsa-miR-642	Target
hsa-miR-645	Target
hsa-miR-650	Target
hsa-miR-651	Target
hsa-miR-652	Target
hsa-miR-653	Target
hsa-miR-654	Target
hsa-miR-654-3p	Target
hsa-miR-655	Target
hsa-miR-656	Target
hsa-miR-659	Target
hsa-miR-660	Target
hsa-miR-662	Target
hsa-miR-668	Target
hsa-miR-671-3p	Target
hsa-miR-7-2#	Target
hsa-miR-708	Target
hsa-miR-708#	Target
hsa-miR-744	Target
hsa-miR-744#	Target
hsa-miR-758	Target
hsa-miR-766	Target
hsa-miR-769-5p	Target
hsa-miR-770-5p	Target
hsa-miR-873	Target
hsa-miR-874	Target
hsa-miR-885-5p	Target
hsa-miR-886-3p	Target
hsa-miR-886-5p	Target
hsa-miR-887	Target
hsa-miR-888	Target
hsa-miR-889	Target
hsa-miR-891a	Target
hsa-miR-892b	Target
hsa-miR-9#	Target
hsa-miR-922	Target
hsa-miR-92a	Target
hsa-miR-92a-1#	Target
hsa-miR-93#	Target
hsa-miR-938	Target
hsa-miR-939	Target
hsa-miR-941	Target
hsa-miR-942	Target
hsa-miR-943	Target
hsa-miR-944	Target
hsa-miR-95	Target
hsa-miR-98	Target
hsa-miR-99a	Target
hsa-miR-99a#	Target
hsa-miR-99b	Target
hsa-miR-99b#	Target
mmu-let-7d#	Target
mmu-miR-124a	Target
mmu-miR-129-3p	Target
mmu-miR-134	Target
mmu-miR-137	Target
mmu-miR-140	Target
mmu-miR-187	Target
mmu-miR-374-5p	Target
mmu-miR-379	Target
mmu-miR-451	Target
mmu-miR-491	Target
mmu-miR-495	Target
mmu-miR-496	Target
mmu-miR-499	Target
mmu-miR-615	Target
mmu-miR-93	Target
mmu-miR-96	Target
rno-miR-29c#	Target
rno-miR-7#	Target

## Sheet: CT Data
DataAssist Software v3.0
Study: Mesenchymal
Description: Mesenchymal Stem Cells
Maximum allowable CT value: 30.0
Include max CT values in calculations: Yes
Exclude outliers among replicates: Yes
Adjust p-values using Benjamini-Hochberg False Discovery Rate: No
Normalization method: Endogenous Control
Selected controls: RNU48
Reference sample: MSC1
File Name	Well	Assay	Type	Sample	Group	CT	Adjusted CT	Omit
F:\OpenArray\Cycling Data\OA-20 (Mesenchymal Stem Cells) Cycling Data Summary.csv	B1e4	mmu-miR-140	Target	MSC9		18.21	18.21
F:\OpenArray\Cycling Data\OA-20 (Mesenchymal Stem Cells) Cycling Data Summary.csv	B9e4	mmu-miR-140	Target	MSC8		18.446	18.446
F:\OpenArray\Cycling Data\OA-20 (Mesenchymal Stem Cells) Cycling Data Summary.csv	B5e4	mmu-miR-140	Target	MSC7		16.643	16.643
F:\OpenArray\Cycling Data\OA-20 (Mesenchymal Stem Cells) Cycling Data Summary.csv	B1e4	mmu-miR-140	Target	MSC6		16.596	16.596
F:\OpenArray\Cycling Data\OA-20 (Mesenchymal Stem Cells) Cycling Data Summary.csv	B9e4	mmu-miR-140	Target	MSC5		22.64	22.64
F:\OpenArray\Cycling Data\OA-20 (Mesenchymal Stem Cells) Cycling Data Summary.csv	B5e4	mmu-miR-140	Target	MSC4		16.1	16.1
F:\OpenArray\Cycling Data\OA-20 (Mesenchymal Stem Cells) Cycling Data Summary.csv	D10b2	hsa-miR-339-3p	Target	MSC29		19.584	19.584
F:\OpenArray\Cycling Data\OA-20 (Mesenchymal Stem Cells) Cycling Data Summary.csv	B1e4	mmu-miR-140	Target	MSC3		14.551	14.551
F:\OpenArray\Cycling Data\OA-20 (Mesenchymal Stem Cells) Cycling Data Summary.csv	D6b2	hsa-miR-339-3p	Target	MSC28		21.365	21.365
F:\OpenArray\Cycling Data\OA-20 (Mesenchymal Stem Cells) Cycling Data Summary.csv	B9e4	mmu-miR-140	Target	MSC2		17.302	17.302
F:\OpenArray\Cycling Data\OA-20 (Mesenchymal Stem Cells) Cycling Data Summary.csv	D2b2	hsa-miR-339-3p	Target	MSC27		21.602	21.602
F:\OpenArray\Cycling Data\OA-20 (Mesenchymal Stem Cells) Cycling Data Summary.csv	D10b2	hsa-miR-339-3p	Target	MSC26		23.298	23.298
F:\OpenArray\Cycling Data\OA-20 (Mesenchymal Stem Cells) Cycling Data Summary.csv	D6b2	hsa-miR-339-3p	Target	MSC25		21.727	21.727
F:\OpenArray\Cycling Data\OA-20 (Mesenchymal Stem Cells) Cycling Data Summary.csv	D2b2	hsa-miR-339-3p	Target	MSC24		20.437	20.437
F:\OpenArray\Cycling Data\OA-20 (Mesenchymal Stem Cells) Cycling Data Summary.csv	A1d7	RNU44	Candidate Control	MSC3		17.632	17.632
F:\OpenArray\Cycling Data\OA-20 (Mesenchymal Stem Cells) Cycling Data Summary.csv	A2d7	RNU44	Candidate Control	MSC3		15.526	15.526
F:\OpenArray\Cycling Data\OA-20 (Mesenchymal Stem Cells) Cycling Data Summary.csv	A3d7	RNU44	Candidate Control	MSC3		16.714	16.714
F:\OpenArray\Cycling Data\OA-20 (Mesenchymal Stem Cells) Cycling Data Summary.csv	A4d7	RNU44	Candidate Control	MSC3		15.422	15.422
F:\OpenArray\Cycling Data\OA-20 (Mesenchymal Stem Cells) Cycling Data Summary.csv	B1d7	RNU44	Candidate Control	MSC3		14.18	14.18
F:\OpenArray\Cycling Data\OA-20 (Mesenchymal Stem Cells) Cycling Data Summary.csv	B3d7	RNU44	Candidate Control	MSC3		15.205	15.205
F:\OpenArray\Cycling Data\OA-20 (Mesenchymal Stem Cells) Cycling Data Summary.csv	B4d7	RNU44	Candidate Control	MSC3		15.352	15.352
F:\OpenArray\Cycling Data\OA-20 (Mesenchymal Stem Cells) Cycling Data Summary.csv	C1d7	RNU44	Candidate Control	MSC3		14.044	14.044
F:\OpenArray\Cycling Data\OA-20 (Mesenchymal Stem Cells) Cycling Data Summary.csv	C3d7	RNU44	Candidate Control	MSC3		15.494	15.494
F:\OpenArray\Cycling Data\OA-20 (Mesenchymal Stem Cells) Cycling Data Summary.csv	C4d7	RNU44	Candidate Control	MSC3		15.301	15.301
F:\OpenArray\Cycling Data\OA-20 (Mesenchymal Stem Cells) Cycling Data Summary.csv	D2d7	RNU44	Candidate Control	MSC3		14.121	14.121
F:\OpenArray\Cycling Data\OA-20 (Mesenchymal Stem Cells) Cycling Data Summary.csv	D3d7	RNU44	Candidate Control	MSC3		15.241	15.241
F:\OpenArray\Cycling Data\OA-20 (Mesenchymal Stem Cells) Cycling Data Summary.csv	D4d7	RNU44	Candidate Control	MSC3		15.181	15.181
F:\OpenArray\Cycling Data\OA-20 (Mesenchymal Stem Cells) Cycling Data Summary.csv	A9d7	RNU44	Candidate Control	MSC2		15.861	15.861
F:\OpenArray\Cycling Data\OA-20 (Mesenchymal Stem Cells) Cycling Data Summary.csv	A10d7	RNU44	Candidate Control	MSC2		15.946	15.946
F:\OpenArray\Cycling Data\OA-20 (Mesenchymal Stem Cells) Cycling Data Summary.csv	A11d7	RNU44	Candidate Control	MSC2		15.721	15.721
F:\OpenArray\Cycling Data\OA-20 (Mesenchymal Stem Cells) Cycling Data Summary.csv	A12d7	RNU44	Candidate Control	MSC2		15.55	15.55
F:\OpenArray\Cycling Data\OA-20 (Mesenchymal Stem Cells) Cycling Data Summary.csv	B9d7	RNU44	Candidate Control	MSC2		16.083	16.083
F:\OpenArray\Cycling Data\OA-20 (Mesenchymal Stem Cells) Cycling Data Summary.csv	B10d7	RNU44	Candidate Control	MSC2		15.808	15.808
F:\OpenArray\Cycling Data\OA-20 (Mesenchymal Stem Cells) Cycling Data Summary.csv	B11d7	RNU44	Candidate Control	MSC2		15.529	15.529
F:\OpenArray\Cycling Data\OA-20 (Mesenchymal Stem Cells) Cycling Data Summary.csv	B12d7	RNU44	Candidate Control	MSC2		15.505	15.505
F:\OpenArray\Cycling Data\OA-20 (Mesenchymal Stem Cells) Cycling Data Summary.csv	C9d7	RNU44	Candidate Control	MSC2		15.837	15.837
F:\OpenArray\Cycling Data\OA-20 (Mesenchymal Stem Cells) Cycling Data Summary.csv	C10d7	RNU44	Candidate Control	MSC2		15.579	15.579
F:\OpenArray\Cycling Data\OA-20 (Mesenchymal Stem Cells) Cycling Data Summary.csv	C11d7	RNU44	Candidate Control	MSC2		15.642	15.642
F:\OpenArray\Cycling Data\OA-20 (Mesenchymal Stem Cells) Cycling Data Summary.csv	C12d7	RNU44	Candidate Control	MSC2		15.226	15.226
F:\OpenArray\Cycling Data\OA-20 (Mesenchymal Stem Cells) Cycling Data Summary.csv	D9d7	RNU44	Candidate Control	MSC2		15.6	15.6
F:\OpenArray\Cycling Data\OA-20 (Mesenchymal Stem Cells) Cycling Data Summary.csv	D10d7	RNU44	Candidate Control	MSC2		15.592	15.592
F:\OpenArray\Cycling Data\OA-20 (Mesenchymal Stem Cells) Cycling Data Summary.csv	D11d7	RNU44	Candidate Control	MSC2		15.606	15.606
F:\OpenArray\Cycling Data\OA-20 (Mesenchymal Stem Cells) Cycling Data Summary.csv	D12d7	RNU44	Candidate Control	MSC2		15.32	15.32
F:\OpenArray\Cycling Data\OA-20 (Mesenchymal Stem Cells) Cycling Data Summary.csv	B8d7	RNU44	Candidate Control	MSC1		23.889	23.889
F:\OpenArray\Cycling Data\OA-20 (Mesenchymal Stem Cells) Cycling Data Summary.csv	D6d7	RNU44	Candidate Control	MSC1		27.903	27.903
F:\OpenArray\Cycling Data\OA-20 (Mesenchymal Stem Cells) Cycling Data Summary.csv	A1d7	RNU44	Candidate Control	MSC6		14.74	14.74
F:\OpenArray\Cycling Data\OA-20 (Mesenchymal Stem Cells) Cycling Data Summary.csv	A2d7	RNU44	Candidate Control	MSC6		14.556	14.556
F:\OpenArray\Cycling Data\OA-20 (Mesenchymal Stem Cells) Cycling Data Summary.csv	A3d7	RNU44	Candidate Control	MSC6		15.177	15.177
F:\OpenArray\Cycling Data\OA-20 (Mesenchymal Stem Cells) Cycling Data Summary.csv	A4d7	RNU44	Candidate Control	MSC6		15.11	15.11
F:\OpenArray\Cycling Data\OA-20 (Mesenchymal Stem Cells) Cycling Data Summary.csv	B1d7	RNU44	Candidate Control	MSC6		14.912	14.912
F:\OpenArray\Cycling Data\OA-20 (Mesenchymal Stem Cells) Cycling Data Summary.csv	B3d7	RNU44	Candidate Control	MSC6		15.314	15.314
F:\OpenArray\Cycling Data\OA-20 (Mesenchymal Stem Cells) Cycling Data Summary.csv	B4d7	RNU44	Candidate Control	MSC6		15.485	15.485
F:\OpenArray\Cycling Data\OA-20 (Mesenchymal Stem Cells) Cycling Data Summary.csv	C1d7	RNU44	Candidate Control	MSC6		14.874	14.874
F:\OpenArray\Cycling Data\OA-20 (Mesenchymal Stem Cells) Cycling Data Summary.csv	C3d7	RNU44	Candidate Control	MSC6		15.313	15.313
F:\OpenArray\Cycling Data\OA-20 (Mesenchymal Stem Cells) Cycling Data Summary.csv	C4d7	RNU44	Candidate Control	MSC6		15.204	15.204
F:\OpenArray\Cycling Data\OA-20 (Mesenchymal Stem Cells) Cycling Data Summary.csv	D2d7	RNU44	Candidate Control	MSC6		14.721	14.721
F:\OpenArray\Cycling Data\OA-20 (Mesenchymal Stem Cells) Cycling Data Summary.csv	D3d7	RNU44	Candidate Control	MSC6		15.213	15.213
F:\OpenArray\Cycling Data\OA-20 (Mesenchymal Stem Cells) Cycling Data Summary.csv	D4d7	RNU44	Candidate Control	MSC6		15.269	15.269
F:\OpenArray\Cycling Data\OA-20 (Mesenchymal Stem Cells) Cycling Data Summary.csv	A5d7	RNU44	Candidate Control	MSC7		14.371	14.371
F:\OpenArray\Cycling Data\OA-20 (Mesenchymal Stem Cells) Cycling Data Summary.csv	A6d7	RNU44	Candidate Control	MSC7		14.418	14.418
F:\OpenArray\Cycling Data\OA-20 (Mesenchymal Stem Cells) Cycling Data Summary.csv	A7d7	RNU44	Candidate Control	MSC7		14.304	14.304
F:\OpenArray\Cycling Data\OA-20 (Mesenchymal Stem Cells) Cycling Data Summary.csv	A8d7	RNU44	Candidate Control	MSC7		14.009	14.009
F:\OpenArray\Cycling Data\OA-20 (Mesenchymal Stem Cells) Cycling Data Summary.csv	B5d7	RNU44	Candidate Control	MSC7		14.517	14.517
F:\OpenArray\Cycling Data\OA-20 (Mesenchymal Stem Cells) Cycling Data Summary.csv	B7d7	RNU44	Candidate Control	MSC7		14.542	14.542
F:\OpenArray\Cycling Data\OA-20 (Mesenchymal Stem Cells) Cycling Data Summary.csv	B8d7	RNU44	Candidate Control	MSC7		14.624	14.624
F:\OpenArray\Cycling Data\OA-20 (Mesenchymal Stem Cells) Cycling Data Summary.csv	C5d7	RNU44	Candidate Control	MSC7		14.508	14.508
F:\OpenArray\Cycling Data\OA-20 (Mesenchymal Stem Cells) Cycling Data Summary.csv	C7d7	RNU44	Candidate Control	MSC7		14.497	14.497
F:\OpenArray\Cycling Data\OA-20 (Mesenchymal Stem Cells) Cycling Data Summary.csv	C8d7	RNU44	Candidate Control	MSC7		14.549	14.549
F:\OpenArray\Cycling Data\OA-20 (Mesenchymal Stem Cells) Cycling Data Summary.csv	D6d7	RNU44	Candidate Control	MSC7		14.535	14.535
F:\OpenArray\Cycling Data\OA-20 (Mesenchymal Stem Cells) Cycling Data Summary.csv	D7d7	RNU44	Candidate Control	MSC7		14.51	14.51
F:\OpenArray\Cycling Data\OA-20 (Mesenchymal Stem Cells) Cycling Data Summary.csv	D8d7	RNU44	Candidate Control	MSC7		14.191	14.191
F:\OpenArray\Cycling Data\OA-20 (Mesenchymal Stem Cells) Cycling Data Summary.csv	A5d7	RNU44	Candidate Control	MSC4		14.764	14.764
F:\OpenArray\Cycling Data\OA-20 (Mesenchymal Stem Cells) Cycling Data Summary.csv	A6d7	RNU44	Candidate Control	MSC4		14.927	14.927
F:\OpenArray\Cycling Data\OA-20 (Mesenchymal Stem Cells) Cycling Data Summary.csv	A7d7	RNU44	Candidate Control	MSC4		15.381	15.381
F:\OpenArray\Cycling Data\OA-20 (Mesenchymal Stem Cells) Cycling Data Summary.csv	A8d7	RNU44	Candidate Control	MSC4		15.552	15.552
F:\OpenArray\Cycling Data\OA-20 (Mesenchymal Stem Cells) Cycling Data Summary.csv	B5d7	RNU44	Candidate Control	MSC4		14.921	14.921
F:\OpenArray\Cycling Data\OA-20 (Mesenchymal Stem Cells) Cycling Data Summary.csv	B7d7	RNU44	Candidate Control	MSC4		15.538	15.538
F:\OpenArray\Cycling Data\OA-20 (Mesenchymal Stem Cells) Cycling Data Summary.csv	B8d7	RNU44	Candidate Control	MSC4		15.473	15.473
F:\OpenArray\Cycling Data\OA-20 (Mesenchymal Stem Cells) Cycling Data Summary.csv	C5d7	RNU44	Candidate Control	MSC4		14.938	14.938
F:\OpenArray\Cycling Data\OA-20 (Mesenchymal Stem Cells) Cycling Data Summary.csv	C7d7	RNU44	Candidate Control	MSC4		15.548	15.548
F:\OpenArray\Cycling Data\OA-20 (Mesenchymal Stem Cells) Cycling Data Summary.csv	C8d7	RNU44	Candidate Control	MSC4		15.722	15.722
F:\OpenArray\Cycling Data\OA-20 (Mesenchymal Stem Cells) Cycling Data Summary.csv	D6d7	RNU44	Candidate Control	MSC4		14.91	14.91
F:\OpenArray\Cycling Data\OA-20 (Mesenchymal Stem Cells) Cycling Data Summary.csv	D7d7	RNU44	Candidate Control	MSC4		15.669	15.669
F:\OpenArray\Cycling Data\OA-20 (Mesenchymal Stem Cells) Cycling Data Summary.csv	D8d7	RNU44	Candidate Control	MSC4		15.425	15.425
F:\OpenArray\Cycling Data\OA-20 (Mesenchymal Stem Cells) Cycling Data Summary.csv	A9d7	RNU44	Candidate Control	MSC5		20.543	20.543
F:\OpenArray\Cycling Data\OA-20 (Mesenchymal Stem Cells) Cycling Data Summary.csv	A10d7	RNU44	Candidate Control	MSC5		20.492	20.492
F:\OpenArray\Cycling Data\OA-20 (Mesenchymal Stem Cells) Cycling Data Summary.csv	B9d7	RNU44	Candidate Control	MSC5		20.704	20.704
F:\OpenArray\Cycling Data\OA-20 (Mesenchymal Stem Cells) Cycling Data Summary.csv	B11d7	RNU44	Candidate Control	MSC5		16.419	16.419
F:\OpenArray\Cycling Data\OA-20 (Mesenchymal Stem Cells) Cycling Data Summary.csv	B12d7	RNU44	Candidate Control	MSC5		16.857	16.857
F:\OpenArray\Cycling Data\OA-20 (Mesenchymal Stem Cells) Cycling Data Summary.csv	C9d7	RNU44	Candidate Control	MSC5		20.518	20.518
F:\OpenArray\Cycling Data\OA-20 (Mesenchymal Stem Cells) Cycling Data Summary.csv	C11d7	RNU44	Candidate Control	MSC5		16.502	16.502
F:\OpenArray\Cycling Data\OA-20 (Mesenchymal Stem Cells) Cycling Data Summary.csv	C12d7	RNU44	Candidate Control	MSC5		16.375	16.375
F:\OpenArray\Cycling Data\OA-20 (Mesenchymal Stem Cells) Cycling Data Summary.csv	D10d7	RNU44	Candidate Control	MSC5		20.704	20.704
F:\OpenArray\Cycling Data\OA-20 (Mesenchymal Stem Cells) Cycling Data Summary.csv	D11d7	RNU44	Candidate Control	MSC5		16.495	16.495
F:\OpenArray\Cycling Data\OA-20 (Mesenchymal Stem Cells) Cycling Data Summary.csv	D12d7	RNU44	Candidate Control	MSC5		16.373	16.373
F:\OpenArray\Cycling Data\OA-20 (Mesenchymal Stem Cells) Cycling Data Summary.csv	A9d7	RNU44	Candidate Control	MSC8		15.337	15.337
F:\OpenArray\Cycling Data\OA-20 (Mesenchymal Stem Cells) Cycling Data Summary.csv	A10d7	RNU44	Candidate Control	MSC8		15.289	15.289
F:\OpenArray\Cycling Data\OA-20 (Mesenchymal Stem Cells) Cycling Data Summary.csv	A11d7	RNU44	Candidate Control	MSC8		16.961	16.961
F:\OpenArray\Cycling Data\OA-20 (Mesenchymal Stem Cells) Cycling Data Summary.csv	B9d7	RNU44	Candidate Control	MSC8		15.579	15.579
F:\OpenArray\Cycling Data\OA-20 (Mesenchymal Stem Cells) Cycling Data Summary.csv	B11d7	RNU44	Candidate Control	MSC8		16.472	16.472
F:\OpenArray\Cycling Data\OA-20 (Mesenchymal Stem Cells) Cycling Data Summary.csv	B12d7	RNU44	Candidate Control	MSC8		16.596	16.596
F:\OpenArray\Cycling Data\OA-20 (Mesenchymal Stem Cells) Cycling Data Summary.csv	C9d7	RNU44	Candidate Control	MSC8		15.529	15.529
F:\OpenArray\Cycling Data\OA-20 (Mesenchymal Stem Cells) Cycling Data Summary.csv	C11d7	RNU44	Candidate Control	MSC8		16.757	16.757
F:\OpenArray\Cycling Data\OA-20 (Mesenchymal Stem Cells) Cycling Data Summary.csv	C12d7	RNU44	Candidate Control	MSC8		16.166	16.166
F:\OpenArray\Cycling Data\OA-20 (Mesenchymal Stem Cells) Cycling Data Summary.csv	D10d7	RNU44	Candidate Control	MSC8		15.139	15.139
F:\OpenArray\Cycling Data\OA-20 (Mesenchymal Stem Cells) Cycling Data Summary.csv	D11d7	RNU44	Candidate Control	MSC8		16.429	16.429
F:\OpenArray\Cycling Data\OA-20 (Mesenchymal Stem Cells) Cycling Data Summary.csv	D12d7	RNU44	Candidate Control	MSC8		17.603	17.603
F:\OpenArray\Cycling Data\OA-20 (Mesenchymal Stem Cells) Cycling Data Summary.csv	A1d7	RNU44	Candidate Control	MSC9		15.418	15.418
F:\OpenArray\Cycling Data\OA-20 (Mesenchymal Stem Cells) Cycling Data Summary.csv	A2d7	RNU44	Candidate Control	MSC9		15.51	15.51
F:\OpenArray\Cycling Data\OA-20 (Mesenchymal Stem Cells) Cycling Data Summary.csv	A3d7	RNU44	Candidate Control	MSC9		15.602	15.602
F:\OpenArray\Cycling Data\OA-20 (Mesenchymal Stem Cells) Cycling Data Summary.csv	A4d7	RNU44	Candidate Control	MSC9		15.518	15.518
F:\OpenArray\Cycling Data\OA-20 (Mesenchymal Stem Cells) Cycling Data Summary.csv	B1d7	RNU44	Candidate Control	MSC9		15.645	15.645
F:\OpenArray\Cycling Data\OA-20 (Mesenchymal Stem Cells) Cycling Data Summary.csv	B3d7	RNU44	Candidate Control	MSC9		15.399	15.399
F:\OpenArray\Cycling Data\OA-20 (Mesenchymal Stem Cells) Cycling Data Summary.csv	B4d7	RNU44	Candidate Control	MSC9		15.832	15.832
F:\OpenArray\Cycling Data\OA-20 (Mesenchymal Stem Cells) Cycling Data Summary.csv	C1d7	RNU44	Candidate Control	MSC9		15.416	15.416
F:\OpenArray\Cycling Data\OA-20 (Mesenchymal Stem Cells) Cycling Data Summary.csv	C3d7	RNU44	Candidate Control	MSC9		15.68	15.68
F:\OpenArray\Cycling Data\OA-20 (Mesenchymal Stem Cells) Cycling Data Summary.csv	C4d7	RNU44	Candidate Control	MSC9		15.628	15.628
F:\OpenArray\Cycling Data\OA-20 (Mesenchymal Stem Cells) Cycling Data Summary.csv	D2d7	RNU44	Candidate Control	MSC9		15.114	15.114
F:\OpenArray\Cycling Data\OA-20 (Mesenchymal Stem Cells) Cycling Data Summary.csv	D3d7	RNU44	Candidate Control	MSC9		15.325	15.325
F:\OpenArray\Cycling Data\OA-20 (Mesenchymal Stem Cells) Cycling Data Summary.csv	D4d7	RNU44	Candidate Control	MSC9		15.398	15.398
F:\OpenArray\Cycling Data\OA-20 (Mesenchymal Stem Cells) Cycling Data Summary.csv	C9c4	hsa-miR-141	Target	MSC20		28.933	28.933
F:\OpenArray\Cycling Data\OA-20 (Mesenchymal Stem Cells) Cycling Data Summary.csv	C5c4	hsa-miR-141	Target	MSC22		26.861	26.861
F:\OpenArray\Cycling Data\OA-20 (Mesenchymal Stem Cells) Cycling Data Summary.csv	C1c4	hsa-miR-141	Target	MSC21		26.357	26.357
F:\OpenArray\Cycling Data\OA-20 (Mesenchymal Stem Cells) Cycling Data Summary.csv	C9c4	hsa-miR-141	Target	MSC14		27.581	27.581
F:\OpenArray\Cycling Data\OA-20 (Mesenchymal Stem Cells) Cycling Data Summary.csv	C1c4	hsa-miR-141	Target	MSC15		27.254	27.254
F:\OpenArray\Cycling Data\OA-20 (Mesenchymal Stem Cells) Cycling Data Summary.csv	D10b2	hsa-miR-339-3p	Target	MSC11		23.061	23.061
F:\OpenArray\Cycling Data\OA-20 (Mesenchymal Stem Cells) Cycling Data Summary.csv	D2b2	hsa-miR-339-3p	Target	MSC12		21.673	21.673
F:\OpenArray\Cycling Data\OA-20 (Mesenchymal Stem Cells) Cycling Data Summary.csv	D6b2	hsa-miR-339-3p	Target	MSC10		22.808	22.808
F:\OpenArray\Cycling Data\OA-20 (Mesenchymal Stem Cells) Cycling Data Summary.csv	C1c7	hsa-miR-486-3p	Target	MSC18		30.188	30
F:\OpenArray\Cycling Data\OA-20 (Mesenchymal Stem Cells) Cycling Data Summary.csv	C5c7	hsa-miR-486-3p	Target	MSC16		27.368	27.368
F:\OpenArray\Cycling Data\OA-20 (Mesenchymal Stem Cells) Cycling Data Summary.csv	A7e3	hsa-miR-126#	Target	MSC7		25.246	25.246
F:\OpenArray\Cycling Data\OA-20 (Mesenchymal Stem Cells) Cycling Data Summary.csv	A11e3	hsa-miR-126#	Target	MSC5		25.932	25.932
F:\OpenArray\Cycling Data\OA-20 (Mesenchymal Stem Cells) Cycling Data Summary.csv	A3e3	hsa-miR-126#	Target	MSC6		24.854	24.854
F:\OpenArray\Cycling Data\OA-20 (Mesenchymal Stem Cells) Cycling Data Summary.csv	A3e3	hsa-miR-126#	Target	MSC3		25.426	25.426
F:\OpenArray\Cycling Data\OA-20 (Mesenchymal Stem Cells) Cycling Data Summary.csv	A7e3	hsa-miR-126#	Target	MSC4		27.368	27.368
F:\OpenArray\Cycling Data\OA-20 (Mesenchymal Stem Cells) Cycling Data Summary.csv	A11e3	hsa-miR-126#	Target	MSC2		26.947	26.947
F:\OpenArray\Cycling Data\OA-20 (Mesenchymal Stem Cells) Cycling Data Summary.csv	D10b2	hsa-miR-339-3p	Target	MSC14		23.226	23.226
F:\OpenArray\Cycling Data\OA-20 (Mesenchymal Stem Cells) Cycling Data Summary.csv	D6b2	hsa-miR-339-3p	Target	MSC13		20.639	20.639
F:\OpenArray\Cycling Data\OA-20 (Mesenchymal Stem Cells) Cycling Data Summary.csv	D6b2	hsa-miR-339-3p	Target	MSC16		21.664	21.664
F:\OpenArray\Cycling Data\OA-20 (Mesenchymal Stem Cells) Cycling Data Summary.csv	D2b2	hsa-miR-339-3p	Target	MSC15		22.16	22.16
F:\OpenArray\Cycling Data\OA-20 (Mesenchymal Stem Cells) Cycling Data Summary.csv	D2b2	hsa-miR-339-3p	Target	MSC18		20.815	20.815
F:\OpenArray\Cycling Data\OA-20 (Mesenchymal Stem Cells) Cycling Data Summary.csv	D10b2	hsa-miR-339-3p	Target	MSC17		21.79	21.79
F:\OpenArray\Cycling Data\OA-20 (Mesenchymal Stem Cells) Cycling Data Summary.csv	A3e3	hsa-miR-126#	Target	MSC9		26.327	26.327
F:\OpenArray\Cycling Data\OA-20 (Mesenchymal Stem Cells) Cycling Data Summary.csv	D6b2	hsa-miR-339-3p	Target	MSC19		21.846	21.846
F:\OpenArray\Cycling Data\OA-20 (Mesenchymal Stem Cells) Cycling Data Summary.csv	B11a3	hsa-miR-34b	Target	MSC5		23.01	23.01
F:\OpenArray\Cycling Data\OA-20 (Mesenchymal Stem Cells) Cycling Data Summary.csv	D11e3	hsa-miR-34b	Target	MSC5		26.7	26.7
F:\OpenArray\Cycling Data\OA-20 (Mesenchymal Stem Cells) Cycling Data Summary.csv	B7a3	hsa-miR-34b	Target	MSC4		21.101	21.101
F:\OpenArray\Cycling Data\OA-20 (Mesenchymal Stem Cells) Cycling Data Summary.csv	D7e3	hsa-miR-34b	Target	MSC4		26.497	26.497
F:\OpenArray\Cycling Data\OA-20 (Mesenchymal Stem Cells) Cycling Data Summary.csv	A2a6	hsa-miR-423-5p	Target	MSC9		21.383	21.383
F:\OpenArray\Cycling Data\OA-20 (Mesenchymal Stem Cells) Cycling Data Summary.csv	B3a3	hsa-miR-34b	Target	MSC3		21.478	21.478
F:\OpenArray\Cycling Data\OA-20 (Mesenchymal Stem Cells) Cycling Data Summary.csv	D3e3	hsa-miR-34b	Target	MSC3		25.474	25.474
F:\OpenArray\Cycling Data\OA-20 (Mesenchymal Stem Cells) Cycling Data Summary.csv	A10a6	hsa-miR-423-5p	Target	MSC8		23.658	23.658
F:\OpenArray\Cycling Data\OA-20 (Mesenchymal Stem Cells) Cycling Data Summary.csv	B11a3	hsa-miR-34b	Target	MSC2		21.26	21.26
F:\OpenArray\Cycling Data\OA-20 (Mesenchymal Stem Cells) Cycling Data Summary.csv	D11e3	hsa-miR-34b	Target	MSC2		24.925	24.925
F:\OpenArray\Cycling Data\OA-20 (Mesenchymal Stem Cells) Cycling Data Summary.csv	B3a3	hsa-miR-34b	Target	MSC9		20.637	20.637
F:\OpenArray\Cycling Data\OA-20 (Mesenchymal Stem Cells) Cycling Data Summary.csv	D3e3	hsa-miR-34b	Target	MSC9		26.943	26.943
F:\OpenArray\Cycling Data\OA-20 (Mesenchymal Stem Cells) Cycling Data Summary.csv	A6a6	hsa-miR-423-5p	Target	MSC7		21.844	21.844
F:\OpenArray\Cycling Data\OA-20 (Mesenchymal Stem Cells) Cycling Data Summary.csv	D10b2	hsa-miR-339-3p	Target	MSC20		21.421	21.421
F:\OpenArray\Cycling Data\OA-20 (Mesenchymal Stem Cells) Cycling Data Summary.csv	B11a3	hsa-miR-34b	Target	MSC8		21.498	21.498
F:\OpenArray\Cycling Data\OA-20 (Mesenchymal Stem Cells) Cycling Data Summary.csv	D11e3	hsa-miR-34b	Target	MSC8		27.438	27.438
F:\OpenArray\Cycling Data\OA-20 (Mesenchymal Stem Cells) Cycling Data Summary.csv	A2a6	hsa-miR-423-5p	Target	MSC6		22.397	22.397
F:\OpenArray\Cycling Data\OA-20 (Mesenchymal Stem Cells) Cycling Data Summary.csv	D2b2	hsa-miR-339-3p	Target	MSC21		19.431	19.431
F:\OpenArray\Cycling Data\OA-20 (Mesenchymal Stem Cells) Cycling Data Summary.csv	B7a3	hsa-miR-34b	Target	MSC7		20.224	20.224
F:\OpenArray\Cycling Data\OA-20 (Mesenchymal Stem Cells) Cycling Data Summary.csv	D7e3	hsa-miR-34b	Target	MSC7		24.971	24.971
F:\OpenArray\Cycling Data\OA-20 (Mesenchymal Stem Cells) Cycling Data Summary.csv	A10a6	hsa-miR-423-5p	Target	MSC5		25.855	25.855
F:\OpenArray\Cycling Data\OA-20 (Mesenchymal Stem Cells) Cycling Data Summary.csv	D6b2	hsa-miR-339-3p	Target	MSC22		20.991	20.991
F:\OpenArray\Cycling Data\OA-20 (Mesenchymal Stem Cells) Cycling Data Summary.csv	B3a3	hsa-miR-34b	Target	MSC6		21.853	21.853
F:\OpenArray\Cycling Data\OA-20 (Mesenchymal Stem Cells) Cycling Data Summary.csv	D3e3	hsa-miR-34b	Target	MSC6		26.702	26.702
F:\OpenArray\Cycling Data\OA-20 (Mesenchymal Stem Cells) Cycling Data Summary.csv	A6a6	hsa-miR-423-5p	Target	MSC4		22.747	22.747
F:\OpenArray\Cycling Data\OA-20 (Mesenchymal Stem Cells) Cycling Data Summary.csv	D10b2	hsa-miR-339-3p	Target	MSC23		23.023	23.023
F:\OpenArray\Cycling Data\OA-20 (Mesenchymal Stem Cells) Cycling Data Summary.csv	A2a6	hsa-miR-423-5p	Target	MSC3		21.675	21.675
F:\OpenArray\Cycling Data\OA-20 (Mesenchymal Stem Cells) Cycling Data Summary.csv	A10a6	hsa-miR-423-5p	Target	MSC2		23.559	23.559
F:\OpenArray\Cycling Data\OA-20 (Mesenchymal Stem Cells) Cycling Data Summary.csv	B10g3	mmu-miR-129-3p	Target	MSC23		26.511	26.511
F:\OpenArray\Cycling Data\OA-20 (Mesenchymal Stem Cells) Cycling Data Summary.csv	B6g3	mmu-miR-129-3p	Target	MSC22		23.742	23.742
F:\OpenArray\Cycling Data\OA-20 (Mesenchymal Stem Cells) Cycling Data Summary.csv	B2g3	mmu-miR-129-3p	Target	MSC21		24.553	24.553
F:\OpenArray\Cycling Data\OA-20 (Mesenchymal Stem Cells) Cycling Data Summary.csv	C2c7	hsa-miR-215	Target	MSC21		24.297	24.297
F:\OpenArray\Cycling Data\OA-20 (Mesenchymal Stem Cells) Cycling Data Summary.csv	C10c7	hsa-miR-215	Target	MSC23		27.165	27.165
F:\OpenArray\Cycling Data\OA-20 (Mesenchymal Stem Cells) Cycling Data Summary.csv	A9a6	hsa-miR-485-3p	Target	MSC14		26.64	26.64
F:\OpenArray\Cycling Data\OA-20 (Mesenchymal Stem Cells) Cycling Data Summary.csv	A5a6	hsa-miR-485-3p	Target	MSC13		34.327	30
F:\OpenArray\Cycling Data\OA-20 (Mesenchymal Stem Cells) Cycling Data Summary.csv	A5a6	hsa-miR-485-3p	Target	MSC16		25.456	25.456
F:\OpenArray\Cycling Data\OA-20 (Mesenchymal Stem Cells) Cycling Data Summary.csv	A1a6	hsa-miR-485-3p	Target	MSC15		21.484	21.484
F:\OpenArray\Cycling Data\OA-20 (Mesenchymal Stem Cells) Cycling Data Summary.csv	A1a6	hsa-miR-485-3p	Target	MSC18		24.296	24.296
F:\OpenArray\Cycling Data\OA-20 (Mesenchymal Stem Cells) Cycling Data Summary.csv	A9a6	hsa-miR-485-3p	Target	MSC17		29.34	29.34
F:\OpenArray\Cycling Data\OA-20 (Mesenchymal Stem Cells) Cycling Data Summary.csv	A5a6	hsa-miR-485-3p	Target	MSC19		23.992	23.992
F:\OpenArray\Cycling Data\OA-20 (Mesenchymal Stem Cells) Cycling Data Summary.csv	B10g3	mmu-miR-129-3p	Target	MSC14		23.907	23.907
F:\OpenArray\Cycling Data\OA-20 (Mesenchymal Stem Cells) Cycling Data Summary.csv	B6g3	mmu-miR-129-3p	Target	MSC13		22.941	22.941
F:\OpenArray\Cycling Data\OA-20 (Mesenchymal Stem Cells) Cycling Data Summary.csv	B2g3	mmu-miR-129-3p	Target	MSC12		23.561	23.561
F:\OpenArray\Cycling Data\OA-20 (Mesenchymal Stem Cells) Cycling Data Summary.csv	A5a6	hsa-miR-485-3p	Target	MSC10		22.385	22.385
F:\OpenArray\Cycling Data\OA-20 (Mesenchymal Stem Cells) Cycling Data Summary.csv	B6g3	mmu-miR-129-3p	Target	MSC10		25.119	25.119
F:\OpenArray\Cycling Data\OA-20 (Mesenchymal Stem Cells) Cycling Data Summary.csv	A1a6	hsa-miR-485-3p	Target	MSC12		30.489	30
F:\OpenArray\Cycling Data\OA-20 (Mesenchymal Stem Cells) Cycling Data Summary.csv	A9a6	hsa-miR-485-3p	Target	MSC11		22.503	22.503
F:\OpenArray\Cycling Data\OA-20 (Mesenchymal Stem Cells) Cycling Data Summary.csv	B10c7	hsa-miR-196b	Target	MSC8		19.86	19.86
F:\OpenArray\Cycling Data\OA-20 (Mesenchymal Stem Cells) Cycling Data Summary.csv	B6c7	hsa-miR-196b	Target	MSC7		20.252	20.252
F:\OpenArray\Cycling Data\OA-20 (Mesenchymal Stem Cells) Cycling Data Summary.csv	B2c7	hsa-miR-196b	Target	MSC9		20.543	20.543
F:\OpenArray\Cycling Data\OA-20 (Mesenchymal Stem Cells) Cycling Data Summary.csv	B6c7	hsa-miR-196b	Target	MSC4		20.697	20.697
F:\OpenArray\Cycling Data\OA-20 (Mesenchymal Stem Cells) Cycling Data Summary.csv	C6c7	hsa-miR-215	Target	MSC16		24.573	24.573
F:\OpenArray\Cycling Data\OA-20 (Mesenchymal Stem Cells) Cycling Data Summary.csv	B2c7	hsa-miR-196b	Target	MSC3		19.2	19.2
F:\OpenArray\Cycling Data\OA-20 (Mesenchymal Stem Cells) Cycling Data Summary.csv	B2c7	hsa-miR-196b	Target	MSC6		20.595	20.595
F:\OpenArray\Cycling Data\OA-20 (Mesenchymal Stem Cells) Cycling Data Summary.csv	C10c7	hsa-miR-215	Target	MSC14		25.111	25.111
F:\OpenArray\Cycling Data\OA-20 (Mesenchymal Stem Cells) Cycling Data Summary.csv	B10c7	hsa-miR-196b	Target	MSC5		23.477	23.477
F:\OpenArray\Cycling Data\OA-20 (Mesenchymal Stem Cells) Cycling Data Summary.csv	C6c7	hsa-miR-215	Target	MSC13		24.351	24.351
F:\OpenArray\Cycling Data\OA-20 (Mesenchymal Stem Cells) Cycling Data Summary.csv	B10c7	hsa-miR-196b	Target	MSC2		20.105	20.105
F:\OpenArray\Cycling Data\OA-20 (Mesenchymal Stem Cells) Cycling Data Summary.csv	B6c7	hsa-miR-196b	Target	MSC1		29.028	29.028
F:\OpenArray\Cycling Data\OA-20 (Mesenchymal Stem Cells) Cycling Data Summary.csv	D10f2	hsa-miR-574-3p	Target	MSC29		13.432	13.432
F:\OpenArray\Cycling Data\OA-20 (Mesenchymal Stem Cells) Cycling Data Summary.csv	D6f2	hsa-miR-574-3p	Target	MSC28		15.275	15.275
F:\OpenArray\Cycling Data\OA-20 (Mesenchymal Stem Cells) Cycling Data Summary.csv	D2f2	hsa-miR-574-3p	Target	MSC27		15.266	15.266
F:\OpenArray\Cycling Data\OA-20 (Mesenchymal Stem Cells) Cycling Data Summary.csv	D10f2	hsa-miR-574-3p	Target	MSC26		15.611	15.611
F:\OpenArray\Cycling Data\OA-20 (Mesenchymal Stem Cells) Cycling Data Summary.csv	D6f2	hsa-miR-574-3p	Target	MSC25		15.185	15.185
F:\OpenArray\Cycling Data\OA-20 (Mesenchymal Stem Cells) Cycling Data Summary.csv	D2f2	hsa-miR-574-3p	Target	MSC24		13.565	13.565
F:\OpenArray\Cycling Data\OA-20 (Mesenchymal Stem Cells) Cycling Data Summary.csv	D10f2	hsa-miR-574-3p	Target	MSC23		15.594	15.594
F:\OpenArray\Cycling Data\OA-20 (Mesenchymal Stem Cells) Cycling Data Summary.csv	D6f2	hsa-miR-574-3p	Target	MSC22		16.509	16.509
F:\OpenArray\Cycling Data\OA-20 (Mesenchymal Stem Cells) Cycling Data Summary.csv	D2f2	hsa-miR-574-3p	Target	MSC21		14.261	14.261
F:\OpenArray\Cycling Data\OA-20 (Mesenchymal Stem Cells) Cycling Data Summary.csv	D10f2	hsa-miR-574-3p	Target	MSC20		13.931	13.931
F:\OpenArray\Cycling Data\OA-20 (Mesenchymal Stem Cells) Cycling Data Summary.csv	D10f2	hsa-miR-574-3p	Target	MSC17		16.673	16.673
F:\OpenArray\Cycling Data\OA-20 (Mesenchymal Stem Cells) Cycling Data Summary.csv	D6f2	hsa-miR-574-3p	Target	MSC16		14.083	14.083
F:\OpenArray\Cycling Data\OA-20 (Mesenchymal Stem Cells) Cycling Data Summary.csv	D6f2	hsa-miR-574-3p	Target	MSC19		14.423	14.423
F:\OpenArray\Cycling Data\OA-20 (Mesenchymal Stem Cells) Cycling Data Summary.csv	D2f2	hsa-miR-574-3p	Target	MSC18		12.608	12.608
F:\OpenArray\Cycling Data\OA-20 (Mesenchymal Stem Cells) Cycling Data Summary.csv	D6f2	hsa-miR-574-3p	Target	MSC13		13.733	13.733
F:\OpenArray\Cycling Data\OA-20 (Mesenchymal Stem Cells) Cycling Data Summary.csv	D2f2	hsa-miR-574-3p	Target	MSC12		14.551	14.551
F:\OpenArray\Cycling Data\OA-20 (Mesenchymal Stem Cells) Cycling Data Summary.csv	D2f2	hsa-miR-574-3p	Target	MSC15		14.013	14.013
F:\OpenArray\Cycling Data\OA-20 (Mesenchymal Stem Cells) Cycling Data Summary.csv	D10f2	hsa-miR-574-3p	Target	MSC14		14.517	14.517
F:\OpenArray\Cycling Data\OA-20 (Mesenchymal Stem Cells) Cycling Data Summary.csv	D10f2	hsa-miR-574-3p	Target	MSC11		15.231	15.231
F:\OpenArray\Cycling Data\OA-20 (Mesenchymal Stem Cells) Cycling Data Summary.csv	D6f2	hsa-miR-574-3p	Target	MSC10		16.008	16.008
F:\OpenArray\Cycling Data\OA-20 (Mesenchymal Stem Cells) Cycling Data Summary.csv	D1e4	hsa-miR-500	Target	MSC9		23.669	23.669
F:\OpenArray\Cycling Data\OA-20 (Mesenchymal Stem Cells) Cycling Data Summary.csv	C8a8	hsa-miR-222#	Target	MSC22		18.159	18.159
F:\OpenArray\Cycling Data\OA-20 (Mesenchymal Stem Cells) Cycling Data Summary.csv	A4c8	hsa-miR-34a#	Target	MSC27		22.516	22.516
F:\OpenArray\Cycling Data\OA-20 (Mesenchymal Stem Cells) Cycling Data Summary.csv	D9e4	hsa-miR-500	Target	MSC8		26.026	26.026
F:\OpenArray\Cycling Data\OA-20 (Mesenchymal Stem Cells) Cycling Data Summary.csv	D9b5	hsa-miR-27a	Target	MSC2		19.767	19.767
F:\OpenArray\Cycling Data\OA-20 (Mesenchymal Stem Cells) Cycling Data Summary.csv	C12a8	hsa-miR-222#	Target	MSC23		24.298	24.298
F:\OpenArray\Cycling Data\OA-20 (Mesenchymal Stem Cells) Cycling Data Summary.csv	A12c8	hsa-miR-34a#	Target	MSC26		24.078	24.078
F:\OpenArray\Cycling Data\OA-20 (Mesenchymal Stem Cells) Cycling Data Summary.csv	D5e4	hsa-miR-500	Target	MSC7		23.467	23.467
F:\OpenArray\Cycling Data\OA-20 (Mesenchymal Stem Cells) Cycling Data Summary.csv	A12c8	hsa-miR-34a#	Target	MSC29		19.617	19.617
F:\OpenArray\Cycling Data\OA-20 (Mesenchymal Stem Cells) Cycling Data Summary.csv	C12a8	hsa-miR-222#	Target	MSC20		22.919	22.919
F:\OpenArray\Cycling Data\OA-20 (Mesenchymal Stem Cells) Cycling Data Summary.csv	D1e4	hsa-miR-500	Target	MSC6		23.131	23.131
F:\OpenArray\Cycling Data\OA-20 (Mesenchymal Stem Cells) Cycling Data Summary.csv	C4a8	hsa-miR-222#	Target	MSC21		18.34	18.34
F:\OpenArray\Cycling Data\OA-20 (Mesenchymal Stem Cells) Cycling Data Summary.csv	A8c8	hsa-miR-34a#	Target	MSC28		20.868	20.868
F:\OpenArray\Cycling Data\OA-20 (Mesenchymal Stem Cells) Cycling Data Summary.csv	D9b5	hsa-miR-27a	Target	MSC5		26.47	26.47
F:\OpenArray\Cycling Data\OA-20 (Mesenchymal Stem Cells) Cycling Data Summary.csv	D1b5	hsa-miR-27a	Target	MSC6		18.26	18.26
F:\OpenArray\Cycling Data\OA-20 (Mesenchymal Stem Cells) Cycling Data Summary.csv	D1b5	hsa-miR-27a	Target	MSC3		17.987	17.987
F:\OpenArray\Cycling Data\OA-20 (Mesenchymal Stem Cells) Cycling Data Summary.csv	D5b5	hsa-miR-27a	Target	MSC4		19.123	19.123
F:\OpenArray\Cycling Data\OA-20 (Mesenchymal Stem Cells) Cycling Data Summary.csv	D1b5	hsa-miR-27a	Target	MSC9		20.076	20.076
F:\OpenArray\Cycling Data\OA-20 (Mesenchymal Stem Cells) Cycling Data Summary.csv	D5b5	hsa-miR-27a	Target	MSC7		18.766	18.766
F:\OpenArray\Cycling Data\OA-20 (Mesenchymal Stem Cells) Cycling Data Summary.csv	D9b5	hsa-miR-27a	Target	MSC8		22.248	22.248
F:\OpenArray\Cycling Data\OA-20 (Mesenchymal Stem Cells) Cycling Data Summary.csv	B9g6	mmu-miR-496	Target	MSC20		28.194	28.194
F:\OpenArray\Cycling Data\OA-20 (Mesenchymal Stem Cells) Cycling Data Summary.csv	B1g6	mmu-miR-496	Target	MSC21		29.777	29.777
F:\OpenArray\Cycling Data\OA-20 (Mesenchymal Stem Cells) Cycling Data Summary.csv	B8a4	hsa-miR-148b#	Target	MSC13		27.542	27.542
F:\OpenArray\Cycling Data\OA-20 (Mesenchymal Stem Cells) Cycling Data Summary.csv	A9e3	hsa-miR-127	Target	MSC2		17.84	17.84
F:\OpenArray\Cycling Data\OA-20 (Mesenchymal Stem Cells) Cycling Data Summary.csv	B4a4	hsa-miR-148b#	Target	MSC12		28.539	28.539
F:\OpenArray\Cycling Data\OA-20 (Mesenchymal Stem Cells) Cycling Data Summary.csv	A5e3	hsa-miR-127	Target	MSC4		17.226	17.226
F:\OpenArray\Cycling Data\OA-20 (Mesenchymal Stem Cells) Cycling Data Summary.csv	B12a4	hsa-miR-148b#	Target	MSC11		29.063	29.063
F:\OpenArray\Cycling Data\OA-20 (Mesenchymal Stem Cells) Cycling Data Summary.csv	A1e3	hsa-miR-127	Target	MSC3		17.919	17.919
F:\OpenArray\Cycling Data\OA-20 (Mesenchymal Stem Cells) Cycling Data Summary.csv	B8a4	hsa-miR-148b#	Target	MSC10		30.207	30
F:\OpenArray\Cycling Data\OA-20 (Mesenchymal Stem Cells) Cycling Data Summary.csv	B12a4	hsa-miR-148b#	Target	MSC17		26.798	26.798
F:\OpenArray\Cycling Data\OA-20 (Mesenchymal Stem Cells) Cycling Data Summary.csv	A9c1	hsa-miR-381	Target	MSC2		28.599	28.599
F:\OpenArray\Cycling Data\OA-20 (Mesenchymal Stem Cells) Cycling Data Summary.csv	C8a8	hsa-miR-222#	Target	MSC19		22.914	22.914
F:\OpenArray\Cycling Data\OA-20 (Mesenchymal Stem Cells) Cycling Data Summary.csv	B8a4	hsa-miR-148b#	Target	MSC16		27.751	27.751
F:\OpenArray\Cycling Data\OA-20 (Mesenchymal Stem Cells) Cycling Data Summary.csv	C4a8	hsa-miR-222#	Target	MSC18		24.348	24.348
F:\OpenArray\Cycling Data\OA-20 (Mesenchymal Stem Cells) Cycling Data Summary.csv	B4a4	hsa-miR-148b#	Target	MSC15		30.833	30
F:\OpenArray\Cycling Data\OA-20 (Mesenchymal Stem Cells) Cycling Data Summary.csv	A12c8	hsa-miR-34a#	Target	MSC20		22.895	22.895
F:\OpenArray\Cycling Data\OA-20 (Mesenchymal Stem Cells) Cycling Data Summary.csv	C12a8	hsa-miR-222#	Target	MSC17		20.728	20.728
F:\OpenArray\Cycling Data\OA-20 (Mesenchymal Stem Cells) Cycling Data Summary.csv	B12a4	hsa-miR-148b#	Target	MSC14		26.885	26.885
F:\OpenArray\Cycling Data\OA-20 (Mesenchymal Stem Cells) Cycling Data Summary.csv	A4c8	hsa-miR-34a#	Target	MSC21		19.122	19.122
F:\OpenArray\Cycling Data\OA-20 (Mesenchymal Stem Cells) Cycling Data Summary.csv	C8a8	hsa-miR-222#	Target	MSC16		21.864	21.864
F:\OpenArray\Cycling Data\OA-20 (Mesenchymal Stem Cells) Cycling Data Summary.csv	A8c8	hsa-miR-34a#	Target	MSC22		19.534	19.534
F:\OpenArray\Cycling Data\OA-20 (Mesenchymal Stem Cells) Cycling Data Summary.csv	A1c1	hsa-miR-381	Target	MSC6		27.695	27.695
F:\OpenArray\Cycling Data\OA-20 (Mesenchymal Stem Cells) Cycling Data Summary.csv	C4a8	hsa-miR-222#	Target	MSC15		22.182	22.182
F:\OpenArray\Cycling Data\OA-20 (Mesenchymal Stem Cells) Cycling Data Summary.csv	A12c8	hsa-miR-34a#	Target	MSC23		24.056	24.056
F:\OpenArray\Cycling Data\OA-20 (Mesenchymal Stem Cells) Cycling Data Summary.csv	A1c1	hsa-miR-381	Target	MSC3		25.785	25.785
F:\OpenArray\Cycling Data\OA-20 (Mesenchymal Stem Cells) Cycling Data Summary.csv	B8a4	hsa-miR-148b#	Target	MSC19		28.327	28.327
F:\OpenArray\Cycling Data\OA-20 (Mesenchymal Stem Cells) Cycling Data Summary.csv	C12a8	hsa-miR-222#	Target	MSC14		23.066	23.066
F:\OpenArray\Cycling Data\OA-20 (Mesenchymal Stem Cells) Cycling Data Summary.csv	A4c8	hsa-miR-34a#	Target	MSC24		20.908	20.908
F:\OpenArray\Cycling Data\OA-20 (Mesenchymal Stem Cells) Cycling Data Summary.csv	A5c1	hsa-miR-381	Target	MSC4		26.139	26.139
F:\OpenArray\Cycling Data\OA-20 (Mesenchymal Stem Cells) Cycling Data Summary.csv	C8a8	hsa-miR-222#	Target	MSC13		21.762	21.762
F:\OpenArray\Cycling Data\OA-20 (Mesenchymal Stem Cells) Cycling Data Summary.csv	A8c8	hsa-miR-34a#	Target	MSC25		21.391	21.391
F:\OpenArray\Cycling Data\OA-20 (Mesenchymal Stem Cells) Cycling Data Summary.csv	A1d8	hsa-miR-15a	Target	MSC3		20.125	20.125
F:\OpenArray\Cycling Data\OA-20 (Mesenchymal Stem Cells) Cycling Data Summary.csv	A9d8	hsa-miR-15a	Target	MSC2		22.514	22.514
F:\OpenArray\Cycling Data\OA-20 (Mesenchymal Stem Cells) Cycling Data Summary.csv	D5d1	hsa-miR-493	Target	MSC28		22.607	22.607
F:\OpenArray\Cycling Data\OA-20 (Mesenchymal Stem Cells) Cycling Data Summary.csv	D5d1	hsa-miR-493	Target	MSC25		22.809	22.809
F:\OpenArray\Cycling Data\OA-20 (Mesenchymal Stem Cells) Cycling Data Summary.csv	D8a2	hsa-miR-17#	Target	MSC4		31.523	30
F:\OpenArray\Cycling Data\OA-20 (Mesenchymal Stem Cells) Cycling Data Summary.csv	A5d8	hsa-miR-15a	Target	MSC4		21.877	21.877
F:\OpenArray\Cycling Data\OA-20 (Mesenchymal Stem Cells) Cycling Data Summary.csv	D9d1	hsa-miR-493	Target	MSC26		25.721	25.721
F:\OpenArray\Cycling Data\OA-20 (Mesenchymal Stem Cells) Cycling Data Summary.csv	D9d1	hsa-miR-493	Target	MSC29		21.613	21.613
F:\OpenArray\Cycling Data\OA-20 (Mesenchymal Stem Cells) Cycling Data Summary.csv	C12a8	hsa-miR-222#	Target	MSC29		20.532	20.532
F:\OpenArray\Cycling Data\OA-20 (Mesenchymal Stem Cells) Cycling Data Summary.csv	A7f5	HSA-MIR-1262	Target	MSC19		28.293	28.293
F:\OpenArray\Cycling Data\OA-20 (Mesenchymal Stem Cells) Cycling Data Summary.csv	C8a8	hsa-miR-222#	Target	MSC28		21.623	21.623
F:\OpenArray\Cycling Data\OA-20 (Mesenchymal Stem Cells) Cycling Data Summary.csv	A5d8	hsa-miR-15a	Target	MSC7		21.683	21.683
F:\OpenArray\Cycling Data\OA-20 (Mesenchymal Stem Cells) Cycling Data Summary.csv	C8a8	hsa-miR-222#	Target	MSC25		22.765	22.765
F:\OpenArray\Cycling Data\OA-20 (Mesenchymal Stem Cells) Cycling Data Summary.csv	D4a2	hsa-miR-17#	Target	MSC6		32.444	30
F:\OpenArray\Cycling Data\OA-20 (Mesenchymal Stem Cells) Cycling Data Summary.csv	A1d8	hsa-miR-15a	Target	MSC6		21.903	21.903
F:\OpenArray\Cycling Data\OA-20 (Mesenchymal Stem Cells) Cycling Data Summary.csv	C4a8	hsa-miR-222#	Target	MSC24		21.982	21.982
F:\OpenArray\Cycling Data\OA-20 (Mesenchymal Stem Cells) Cycling Data Summary.csv	D4a2	hsa-miR-17#	Target	MSC9		32.277	30
F:\OpenArray\Cycling Data\OA-20 (Mesenchymal Stem Cells) Cycling Data Summary.csv	A1d8	hsa-miR-15a	Target	MSC9		22.934	22.934
F:\OpenArray\Cycling Data\OA-20 (Mesenchymal Stem Cells) Cycling Data Summary.csv	C4a8	hsa-miR-222#	Target	MSC27		22.347	22.347
F:\OpenArray\Cycling Data\OA-20 (Mesenchymal Stem Cells) Cycling Data Summary.csv	D12a2	hsa-miR-17#	Target	MSC8		31.083	30
F:\OpenArray\Cycling Data\OA-20 (Mesenchymal Stem Cells) Cycling Data Summary.csv	A9d8	hsa-miR-15a	Target	MSC8		26.169	26.169
F:\OpenArray\Cycling Data\OA-20 (Mesenchymal Stem Cells) Cycling Data Summary.csv	C12a8	hsa-miR-222#	Target	MSC26		24.51	24.51
F:\OpenArray\Cycling Data\OA-20 (Mesenchymal Stem Cells) Cycling Data Summary.csv	D5d1	hsa-miR-493	Target	MSC22		22.424	22.424
F:\OpenArray\Cycling Data\OA-20 (Mesenchymal Stem Cells) Cycling Data Summary.csv	D1d1	hsa-miR-493	Target	MSC21		20.429	20.429
F:\OpenArray\Cycling Data\OA-20 (Mesenchymal Stem Cells) Cycling Data Summary.csv	D1d1	hsa-miR-493	Target	MSC24		20.018	20.018
F:\OpenArray\Cycling Data\OA-20 (Mesenchymal Stem Cells) Cycling Data Summary.csv	D9d1	hsa-miR-493	Target	MSC23		25.807	25.807
F:\OpenArray\Cycling Data\OA-20 (Mesenchymal Stem Cells) Cycling Data Summary.csv	D9d1	hsa-miR-493	Target	MSC20		23.687	23.687
F:\OpenArray\Cycling Data\OA-20 (Mesenchymal Stem Cells) Cycling Data Summary.csv	C6b1	hsa-miR-26a	Target	MSC4		16.508	16.508
F:\OpenArray\Cycling Data\OA-20 (Mesenchymal Stem Cells) Cycling Data Summary.csv	B7c1	HSA-MIR-191#	Target	MSC19		30.501	30
F:\OpenArray\Cycling Data\OA-20 (Mesenchymal Stem Cells) Cycling Data Summary.csv	B8e3	hsa-miR-378	Target	MSC28		26.196	26.196
F:\OpenArray\Cycling Data\OA-20 (Mesenchymal Stem Cells) Cycling Data Summary.csv	C10b1	hsa-miR-26a	Target	MSC5		23.652	23.652
F:\OpenArray\Cycling Data\OA-20 (Mesenchymal Stem Cells) Cycling Data Summary.csv	D5d1	hsa-miR-493	Target	MSC19		22.773	22.773
F:\OpenArray\Cycling Data\OA-20 (Mesenchymal Stem Cells) Cycling Data Summary.csv	B3c1	HSA-MIR-191#	Target	MSC18		30.223	30
F:\OpenArray\Cycling Data\OA-20 (Mesenchymal Stem Cells) Cycling Data Summary.csv	C10b1	hsa-miR-26a	Target	MSC2		16.632	16.632
F:\OpenArray\Cycling Data\OA-20 (Mesenchymal Stem Cells) Cycling Data Summary.csv	C2b1	hsa-miR-26a	Target	MSC3		15.459	15.459
F:\OpenArray\Cycling Data\OA-20 (Mesenchymal Stem Cells) Cycling Data Summary.csv	B12e3	hsa-miR-378	Target	MSC29		25.467	25.467
F:\OpenArray\Cycling Data\OA-20 (Mesenchymal Stem Cells) Cycling Data Summary.csv	B3c1	HSA-MIR-191#	Target	MSC15		29.105	29.105
F:\OpenArray\Cycling Data\OA-20 (Mesenchymal Stem Cells) Cycling Data Summary.csv	D9d1	hsa-miR-493	Target	MSC14		24.062	24.062
F:\OpenArray\Cycling Data\OA-20 (Mesenchymal Stem Cells) Cycling Data Summary.csv	B4e3	hsa-miR-378	Target	MSC24		26.372	26.372
F:\OpenArray\Cycling Data\OA-20 (Mesenchymal Stem Cells) Cycling Data Summary.csv	D1d1	hsa-miR-493	Target	MSC15		22.009	22.009
F:\OpenArray\Cycling Data\OA-20 (Mesenchymal Stem Cells) Cycling Data Summary.csv	B11c1	HSA-MIR-191#	Target	MSC14		30.203	30
F:\OpenArray\Cycling Data\OA-20 (Mesenchymal Stem Cells) Cycling Data Summary.csv	B12e3	hsa-miR-378	Target	MSC23		28.085	28.085
F:\OpenArray\Cycling Data\OA-20 (Mesenchymal Stem Cells) Cycling Data Summary.csv	B11c1	HSA-MIR-191#	Target	MSC17		31.997	30
F:\OpenArray\Cycling Data\OA-20 (Mesenchymal Stem Cells) Cycling Data Summary.csv	D5d1	hsa-miR-493	Target	MSC16		22.933	22.933
F:\OpenArray\Cycling Data\OA-20 (Mesenchymal Stem Cells) Cycling Data Summary.csv	B12e3	hsa-miR-378	Target	MSC26		30.128	30
F:\OpenArray\Cycling Data\OA-20 (Mesenchymal Stem Cells) Cycling Data Summary.csv	D9d1	hsa-miR-493	Target	MSC17		23.811	23.811
F:\OpenArray\Cycling Data\OA-20 (Mesenchymal Stem Cells) Cycling Data Summary.csv	B7c1	HSA-MIR-191#	Target	MSC16		27.978	27.978
F:\OpenArray\Cycling Data\OA-20 (Mesenchymal Stem Cells) Cycling Data Summary.csv	B8e3	hsa-miR-378	Target	MSC25		26.836	26.836
F:\OpenArray\Cycling Data\OA-20 (Mesenchymal Stem Cells) Cycling Data Summary.csv	B11c1	HSA-MIR-191#	Target	MSC11		30.568	30
F:\OpenArray\Cycling Data\OA-20 (Mesenchymal Stem Cells) Cycling Data Summary.csv	A11a2	hsa-miR-378	Target	MSC20		28.282	28.282
F:\OpenArray\Cycling Data\OA-20 (Mesenchymal Stem Cells) Cycling Data Summary.csv	B12e3	hsa-miR-378	Target	MSC20		25.241	25.241
F:\OpenArray\Cycling Data\OA-20 (Mesenchymal Stem Cells) Cycling Data Summary.csv	B7c1	HSA-MIR-191#	Target	MSC10		30.131	30
F:\OpenArray\Cycling Data\OA-20 (Mesenchymal Stem Cells) Cycling Data Summary.csv	B7c1	HSA-MIR-191#	Target	MSC13		29.703	29.703
F:\OpenArray\Cycling Data\OA-20 (Mesenchymal Stem Cells) Cycling Data Summary.csv	B8e3	hsa-miR-378	Target	MSC22		26.828	26.828
F:\OpenArray\Cycling Data\OA-20 (Mesenchymal Stem Cells) Cycling Data Summary.csv	B3c1	HSA-MIR-191#	Target	MSC12		29.047	29.047
F:\OpenArray\Cycling Data\OA-20 (Mesenchymal Stem Cells) Cycling Data Summary.csv	B4e3	hsa-miR-378	Target	MSC21		27.521	27.521
F:\OpenArray\Cycling Data\OA-20 (Mesenchymal Stem Cells) Cycling Data Summary.csv	C10b1	hsa-miR-26a	Target	MSC8		18.373	18.373
F:\OpenArray\Cycling Data\OA-20 (Mesenchymal Stem Cells) Cycling Data Summary.csv	C2b1	hsa-miR-26a	Target	MSC9		16.352	16.352
F:\OpenArray\Cycling Data\OA-20 (Mesenchymal Stem Cells) Cycling Data Summary.csv	C2b1	hsa-miR-26a	Target	MSC6		16.703	16.703
F:\OpenArray\Cycling Data\OA-20 (Mesenchymal Stem Cells) Cycling Data Summary.csv	C6b1	hsa-miR-26a	Target	MSC7		16.449	16.449
F:\OpenArray\Cycling Data\OA-20 (Mesenchymal Stem Cells) Cycling Data Summary.csv	C8a8	hsa-miR-222#	Target	MSC10		23.821	23.821
F:\OpenArray\Cycling Data\OA-20 (Mesenchymal Stem Cells) Cycling Data Summary.csv	C12a8	hsa-miR-222#	Target	MSC11		23.933	23.933
F:\OpenArray\Cycling Data\OA-20 (Mesenchymal Stem Cells) Cycling Data Summary.csv	C4a8	hsa-miR-222#	Target	MSC12		23.236	23.236
F:\OpenArray\Cycling Data\OA-20 (Mesenchymal Stem Cells) Cycling Data Summary.csv	D5d1	hsa-miR-493	Target	MSC13		23.159	23.159
F:\OpenArray\Cycling Data\OA-20 (Mesenchymal Stem Cells) Cycling Data Summary.csv	D9d1	hsa-miR-493	Target	MSC11		23.77	23.77
F:\OpenArray\Cycling Data\OA-20 (Mesenchymal Stem Cells) Cycling Data Summary.csv	D5d1	hsa-miR-493	Target	MSC10		23.14	23.14
F:\OpenArray\Cycling Data\OA-20 (Mesenchymal Stem Cells) Cycling Data Summary.csv	D2c8	hsa-miR-194	Target	MSC9		25.836	25.836
F:\OpenArray\Cycling Data\OA-20 (Mesenchymal Stem Cells) Cycling Data Summary.csv	B8e3	hsa-miR-378	Target	MSC19		25.922	25.922
F:\OpenArray\Cycling Data\OA-20 (Mesenchymal Stem Cells) Cycling Data Summary.csv	B8a4	hsa-miR-148b#	Target	MSC22		25.679	25.679
F:\OpenArray\Cycling Data\OA-20 (Mesenchymal Stem Cells) Cycling Data Summary.csv	B4a4	hsa-miR-148b#	Target	MSC21		25.56	25.56
F:\OpenArray\Cycling Data\OA-20 (Mesenchymal Stem Cells) Cycling Data Summary.csv	D6c8	hsa-miR-194	Target	MSC7		24.115	24.115
F:\OpenArray\Cycling Data\OA-20 (Mesenchymal Stem Cells) Cycling Data Summary.csv	B4a4	hsa-miR-148b#	Target	MSC24		27.438	27.438
F:\OpenArray\Cycling Data\OA-20 (Mesenchymal Stem Cells) Cycling Data Summary.csv	D10c8	hsa-miR-194	Target	MSC8		24.378	24.378
F:\OpenArray\Cycling Data\OA-20 (Mesenchymal Stem Cells) Cycling Data Summary.csv	B8e3	hsa-miR-378	Target	MSC16		31.101	30
F:\OpenArray\Cycling Data\OA-20 (Mesenchymal Stem Cells) Cycling Data Summary.csv	B4e3	hsa-miR-378	Target	MSC15		32.13	30
F:\OpenArray\Cycling Data\OA-20 (Mesenchymal Stem Cells) Cycling Data Summary.csv	B12e3	hsa-miR-378	Target	MSC14		28.863	28.863
F:\OpenArray\Cycling Data\OA-20 (Mesenchymal Stem Cells) Cycling Data Summary.csv	B12a4	hsa-miR-148b#	Target	MSC20		27.921	27.921
F:\OpenArray\Cycling Data\OA-20 (Mesenchymal Stem Cells) Cycling Data Summary.csv	B12e3	hsa-miR-378	Target	MSC11		28.979	28.979
F:\OpenArray\Cycling Data\OA-20 (Mesenchymal Stem Cells) Cycling Data Summary.csv	D9e4	hsa-miR-500	Target	MSC2		24.884	24.884
F:\OpenArray\Cycling Data\OA-20 (Mesenchymal Stem Cells) Cycling Data Summary.csv	B12a4	hsa-miR-148b#	Target	MSC29		25.218	25.218
F:\OpenArray\Cycling Data\OA-20 (Mesenchymal Stem Cells) Cycling Data Summary.csv	B8e3	hsa-miR-378	Target	MSC10		27.29	27.29
F:\OpenArray\Cycling Data\OA-20 (Mesenchymal Stem Cells) Cycling Data Summary.csv	D10c8	hsa-miR-194	Target	MSC2		25.471	25.471
F:\OpenArray\Cycling Data\OA-20 (Mesenchymal Stem Cells) Cycling Data Summary.csv	D5e4	hsa-miR-500	Target	MSC4		24.516	24.516
F:\OpenArray\Cycling Data\OA-20 (Mesenchymal Stem Cells) Cycling Data Summary.csv	D9e4	hsa-miR-500	Target	MSC5		26.146	26.146
F:\OpenArray\Cycling Data\OA-20 (Mesenchymal Stem Cells) Cycling Data Summary.csv	D2c8	hsa-miR-194	Target	MSC6		24.746	24.746
F:\OpenArray\Cycling Data\OA-20 (Mesenchymal Stem Cells) Cycling Data Summary.csv	B8a4	hsa-miR-148b#	Target	MSC25		28.024	28.024
F:\OpenArray\Cycling Data\OA-20 (Mesenchymal Stem Cells) Cycling Data Summary.csv	D2c8	hsa-miR-194	Target	MSC3		23.603	23.603
F:\OpenArray\Cycling Data\OA-20 (Mesenchymal Stem Cells) Cycling Data Summary.csv	B8a4	hsa-miR-148b#	Target	MSC28		27.75	27.75
F:\OpenArray\Cycling Data\OA-20 (Mesenchymal Stem Cells) Cycling Data Summary.csv	D6c8	hsa-miR-194	Target	MSC4		24.659	24.659
F:\OpenArray\Cycling Data\OA-20 (Mesenchymal Stem Cells) Cycling Data Summary.csv	B4a4	hsa-miR-148b#	Target	MSC27		29.836	29.836
F:\OpenArray\Cycling Data\OA-20 (Mesenchymal Stem Cells) Cycling Data Summary.csv	A9c5	hsa-miR-429	Target	MSC29		29.558	29.558
F:\OpenArray\Cycling Data\OA-20 (Mesenchymal Stem Cells) Cycling Data Summary.csv	A5c5	hsa-miR-429	Target	MSC25		33.421	30
F:\OpenArray\Cycling Data\OA-20 (Mesenchymal Stem Cells) Cycling Data Summary.csv	A5c5	hsa-miR-429	Target	MSC22		29.035	29.035
F:\OpenArray\Cycling Data\OA-20 (Mesenchymal Stem Cells) Cycling Data Summary.csv	A2a8	hsa-miR-377	Target	MSC6		27.953	27.953
F:\OpenArray\Cycling Data\OA-20 (Mesenchymal Stem Cells) Cycling Data Summary.csv	A10a8	hsa-miR-377	Target	MSC2		31.58	30
F:\OpenArray\Cycling Data\OA-20 (Mesenchymal Stem Cells) Cycling Data Summary.csv	A1c5	hsa-miR-429	Target	MSC21		31.482	30
F:\OpenArray\Cycling Data\OA-20 (Mesenchymal Stem Cells) Cycling Data Summary.csv	D6b5	hsa-miR-195	Target	MSC4		20.215	20.215
F:\OpenArray\Cycling Data\OA-20 (Mesenchymal Stem Cells) Cycling Data Summary.csv	D10b5	hsa-miR-195	Target	MSC5		31.345	30
F:\OpenArray\Cycling Data\OA-20 (Mesenchymal Stem Cells) Cycling Data Summary.csv	D10b5	hsa-miR-195	Target	MSC2		20.675	20.675
F:\OpenArray\Cycling Data\OA-20 (Mesenchymal Stem Cells) Cycling Data Summary.csv	D2b5	hsa-miR-195	Target	MSC3		18.443	18.443
F:\OpenArray\Cycling Data\OA-20 (Mesenchymal Stem Cells) Cycling Data Summary.csv	D10b5	hsa-miR-195	Target	MSC8		22.011	22.011
F:\OpenArray\Cycling Data\OA-20 (Mesenchymal Stem Cells) Cycling Data Summary.csv	D2b5	hsa-miR-195	Target	MSC9		19.73	19.73
F:\OpenArray\Cycling Data\OA-20 (Mesenchymal Stem Cells) Cycling Data Summary.csv	D2b5	hsa-miR-195	Target	MSC6		21.023	21.023
F:\OpenArray\Cycling Data\OA-20 (Mesenchymal Stem Cells) Cycling Data Summary.csv	D6b5	hsa-miR-195	Target	MSC7		20.97	20.97
F:\OpenArray\Cycling Data\OA-20 (Mesenchymal Stem Cells) Cycling Data Summary.csv	B3c1	HSA-MIR-191#	Target	MSC24		29.308	29.308
F:\OpenArray\Cycling Data\OA-20 (Mesenchymal Stem Cells) Cycling Data Summary.csv	B3c1	HSA-MIR-191#	Target	MSC21		27.06	27.06
F:\OpenArray\Cycling Data\OA-20 (Mesenchymal Stem Cells) Cycling Data Summary.csv	B7c1	HSA-MIR-191#	Target	MSC22		26.872	26.872
F:\OpenArray\Cycling Data\OA-20 (Mesenchymal Stem Cells) Cycling Data Summary.csv	B7c1	HSA-MIR-191#	Target	MSC28		26.538	26.538
F:\OpenArray\Cycling Data\OA-20 (Mesenchymal Stem Cells) Cycling Data Summary.csv	B7c1	HSA-MIR-191#	Target	MSC25		29.194	29.194
F:\OpenArray\Cycling Data\OA-20 (Mesenchymal Stem Cells) Cycling Data Summary.csv	B11c1	HSA-MIR-191#	Target	MSC29		27.78	27.78
F:\OpenArray\Cycling Data\OA-20 (Mesenchymal Stem Cells) Cycling Data Summary.csv	A6g5	mmu-miR-374-5p	Target	MSC7		18.837	18.837
F:\OpenArray\Cycling Data\OA-20 (Mesenchymal Stem Cells) Cycling Data Summary.csv	A2g5	mmu-miR-374-5p	Target	MSC6		18.715	18.715
F:\OpenArray\Cycling Data\OA-20 (Mesenchymal Stem Cells) Cycling Data Summary.csv	A2g5	mmu-miR-374-5p	Target	MSC9		19.063	19.063
F:\OpenArray\Cycling Data\OA-20 (Mesenchymal Stem Cells) Cycling Data Summary.csv	A10g5	mmu-miR-374-5p	Target	MSC8		17.732	17.732
F:\OpenArray\Cycling Data\OA-20 (Mesenchymal Stem Cells) Cycling Data Summary.csv	D6c5	hsa-miR-519d	Target	MSC13		31.013	30
F:\OpenArray\Cycling Data\OA-20 (Mesenchymal Stem Cells) Cycling Data Summary.csv	A1e3	hsa-miR-127	Target	MSC9		17.392	17.392
F:\OpenArray\Cycling Data\OA-20 (Mesenchymal Stem Cells) Cycling Data Summary.csv	A9e3	hsa-miR-127	Target	MSC8		20.74	20.74
F:\OpenArray\Cycling Data\OA-20 (Mesenchymal Stem Cells) Cycling Data Summary.csv	A5e3	hsa-miR-127	Target	MSC7		17.212	17.212
F:\OpenArray\Cycling Data\OA-20 (Mesenchymal Stem Cells) Cycling Data Summary.csv	A1e3	hsa-miR-127	Target	MSC6		17.337	17.337
F:\OpenArray\Cycling Data\OA-20 (Mesenchymal Stem Cells) Cycling Data Summary.csv	A9e3	hsa-miR-127	Target	MSC5		23.84	23.84
F:\OpenArray\Cycling Data\OA-20 (Mesenchymal Stem Cells) Cycling Data Summary.csv	A8c8	hsa-miR-34a#	Target	MSC19		22.042	22.042
F:\OpenArray\Cycling Data\OA-20 (Mesenchymal Stem Cells) Cycling Data Summary.csv	A12c8	hsa-miR-34a#	Target	MSC17		25.72	25.72
F:\OpenArray\Cycling Data\OA-20 (Mesenchymal Stem Cells) Cycling Data Summary.csv	A4c8	hsa-miR-34a#	Target	MSC18		23.996	23.996
F:\OpenArray\Cycling Data\OA-20 (Mesenchymal Stem Cells) Cycling Data Summary.csv	A4c8	hsa-miR-34a#	Target	MSC15		22.489	22.489
F:\OpenArray\Cycling Data\OA-20 (Mesenchymal Stem Cells) Cycling Data Summary.csv	A8c8	hsa-miR-34a#	Target	MSC16		22.111	22.111
F:\OpenArray\Cycling Data\OA-20 (Mesenchymal Stem Cells) Cycling Data Summary.csv	A12c8	hsa-miR-34a#	Target	MSC14		22.141	22.141
F:\OpenArray\Cycling Data\OA-20 (Mesenchymal Stem Cells) Cycling Data Summary.csv	A8c8	hsa-miR-34a#	Target	MSC13		22.572	22.572
F:\OpenArray\Cycling Data\OA-20 (Mesenchymal Stem Cells) Cycling Data Summary.csv	A4c8	hsa-miR-34a#	Target	MSC12		22.429	22.429
F:\OpenArray\Cycling Data\OA-20 (Mesenchymal Stem Cells) Cycling Data Summary.csv	A12c8	hsa-miR-34a#	Target	MSC11		22.013	22.013
F:\OpenArray\Cycling Data\OA-20 (Mesenchymal Stem Cells) Cycling Data Summary.csv	A6g5	mmu-miR-374-5p	Target	MSC4		19.347	19.347
F:\OpenArray\Cycling Data\OA-20 (Mesenchymal Stem Cells) Cycling Data Summary.csv	A8c8	hsa-miR-34a#	Target	MSC10		21.888	21.888
F:\OpenArray\Cycling Data\OA-20 (Mesenchymal Stem Cells) Cycling Data Summary.csv	A10g5	mmu-miR-374-5p	Target	MSC5		22.98	22.98
F:\OpenArray\Cycling Data\OA-20 (Mesenchymal Stem Cells) Cycling Data Summary.csv	A10g5	mmu-miR-374-5p	Target	MSC2		19.082	19.082
F:\OpenArray\Cycling Data\OA-20 (Mesenchymal Stem Cells) Cycling Data Summary.csv	A2g5	mmu-miR-374-5p	Target	MSC3		17.348	17.348
F:\OpenArray\Cycling Data\OA-20 (Mesenchymal Stem Cells) Cycling Data Summary.csv	B10f5	hsa-miR-544	Target	MSC17		29.474	29.474
F:\OpenArray\Cycling Data\OA-20 (Mesenchymal Stem Cells) Cycling Data Summary.csv	B12a2	hsa-miR-16-1#	Target	MSC2		24.432	24.432
F:\OpenArray\Cycling Data\OA-20 (Mesenchymal Stem Cells) Cycling Data Summary.csv	B4a2	hsa-miR-16-1#	Target	MSC3		24.255	24.255
F:\OpenArray\Cycling Data\OA-20 (Mesenchymal Stem Cells) Cycling Data Summary.csv	B8a2	hsa-miR-16-1#	Target	MSC4		25.143	25.143
F:\OpenArray\Cycling Data\OA-20 (Mesenchymal Stem Cells) Cycling Data Summary.csv	B12a2	hsa-miR-16-1#	Target	MSC5		26.458	26.458
F:\OpenArray\Cycling Data\OA-20 (Mesenchymal Stem Cells) Cycling Data Summary.csv	B4a2	hsa-miR-16-1#	Target	MSC6		25.769	25.769
F:\OpenArray\Cycling Data\OA-20 (Mesenchymal Stem Cells) Cycling Data Summary.csv	B8a2	hsa-miR-16-1#	Target	MSC7		24.097	24.097
F:\OpenArray\Cycling Data\OA-20 (Mesenchymal Stem Cells) Cycling Data Summary.csv	B12a2	hsa-miR-16-1#	Target	MSC8		26.601	26.601
F:\OpenArray\Cycling Data\OA-20 (Mesenchymal Stem Cells) Cycling Data Summary.csv	B10f5	hsa-miR-544	Target	MSC29		29.978	29.978
F:\OpenArray\Cycling Data\OA-20 (Mesenchymal Stem Cells) Cycling Data Summary.csv	B6f5	hsa-miR-544	Target	MSC22		28.51	28.51
F:\OpenArray\Cycling Data\OA-20 (Mesenchymal Stem Cells) Cycling Data Summary.csv	C10g6	mmu-miR-187	Target	MSC17		25.17	25.17
F:\OpenArray\Cycling Data\OA-20 (Mesenchymal Stem Cells) Cycling Data Summary.csv	C10g6	mmu-miR-187	Target	MSC29		28.909	28.909
F:\OpenArray\Cycling Data\OA-20 (Mesenchymal Stem Cells) Cycling Data Summary.csv	C10g6	mmu-miR-187	Target	MSC26		30.508	30
F:\OpenArray\Cycling Data\OA-20 (Mesenchymal Stem Cells) Cycling Data Summary.csv	C9b2	hsa-miR-376a	Target	MSC29		17.462	17.462
F:\OpenArray\Cycling Data\OA-20 (Mesenchymal Stem Cells) Cycling Data Summary.csv	D2g3	mmu-miR-451	Target	MSC3		23.864	23.864
F:\OpenArray\Cycling Data\OA-20 (Mesenchymal Stem Cells) Cycling Data Summary.csv	C5b2	hsa-miR-376a	Target	MSC28		18.536	18.536
F:\OpenArray\Cycling Data\OA-20 (Mesenchymal Stem Cells) Cycling Data Summary.csv	C1b2	hsa-miR-376a	Target	MSC27		18.495	18.495
F:\OpenArray\Cycling Data\OA-20 (Mesenchymal Stem Cells) Cycling Data Summary.csv	C9b2	hsa-miR-376a	Target	MSC26		24.66	24.66
F:\OpenArray\Cycling Data\OA-20 (Mesenchymal Stem Cells) Cycling Data Summary.csv	C5b2	hsa-miR-376a	Target	MSC25		19.441	19.441
F:\OpenArray\Cycling Data\OA-20 (Mesenchymal Stem Cells) Cycling Data Summary.csv	C1b2	hsa-miR-376a	Target	MSC24		18.773	18.773
F:\OpenArray\Cycling Data\OA-20 (Mesenchymal Stem Cells) Cycling Data Summary.csv	C9b2	hsa-miR-376a	Target	MSC23		23.335	23.335
F:\OpenArray\Cycling Data\OA-20 (Mesenchymal Stem Cells) Cycling Data Summary.csv	C5b2	hsa-miR-376a	Target	MSC22		17.651	17.651
F:\OpenArray\Cycling Data\OA-20 (Mesenchymal Stem Cells) Cycling Data Summary.csv	C8b2	dme-miR-7	Candidate Control	MSC10		27.65	27.65
F:\OpenArray\Cycling Data\OA-20 (Mesenchymal Stem Cells) Cycling Data Summary.csv	B5f2	hsa-miR-629	Target	MSC28		31.543	30
F:\OpenArray\Cycling Data\OA-20 (Mesenchymal Stem Cells) Cycling Data Summary.csv	D8d5	hsa-miR-629	Target	MSC28		25.05	25.05
F:\OpenArray\Cycling Data\OA-20 (Mesenchymal Stem Cells) Cycling Data Summary.csv	D2g3	mmu-miR-451	Target	MSC9		26.17	26.17
F:\OpenArray\Cycling Data\OA-20 (Mesenchymal Stem Cells) Cycling Data Summary.csv	B9f2	hsa-miR-629	Target	MSC29		24.94	24.94
F:\OpenArray\Cycling Data\OA-20 (Mesenchymal Stem Cells) Cycling Data Summary.csv	D12d5	hsa-miR-629	Target	MSC29		23.601	23.601
F:\OpenArray\Cycling Data\OA-20 (Mesenchymal Stem Cells) Cycling Data Summary.csv	D12d5	hsa-miR-629	Target	MSC26		25.734	25.734
F:\OpenArray\Cycling Data\OA-20 (Mesenchymal Stem Cells) Cycling Data Summary.csv	D6g3	mmu-miR-451	Target	MSC7		26.211	26.211
F:\OpenArray\Cycling Data\OA-20 (Mesenchymal Stem Cells) Cycling Data Summary.csv	B1f2	hsa-miR-629	Target	MSC27		26.382	26.382
F:\OpenArray\Cycling Data\OA-20 (Mesenchymal Stem Cells) Cycling Data Summary.csv	D4d5	hsa-miR-629	Target	MSC27		23.984	23.984
F:\OpenArray\Cycling Data\OA-20 (Mesenchymal Stem Cells) Cycling Data Summary.csv	B1f2	hsa-miR-629	Target	MSC24		29.339	29.339
F:\OpenArray\Cycling Data\OA-20 (Mesenchymal Stem Cells) Cycling Data Summary.csv	D4d5	hsa-miR-629	Target	MSC24		23.313	23.313
F:\OpenArray\Cycling Data\OA-20 (Mesenchymal Stem Cells) Cycling Data Summary.csv	B5f2	hsa-miR-629	Target	MSC25		31.502	30
F:\OpenArray\Cycling Data\OA-20 (Mesenchymal Stem Cells) Cycling Data Summary.csv	D8d5	hsa-miR-629	Target	MSC25		25.316	25.316
F:\OpenArray\Cycling Data\OA-20 (Mesenchymal Stem Cells) Cycling Data Summary.csv	C12b2	dme-miR-7	Candidate Control	MSC17		26.583	26.583
F:\OpenArray\Cycling Data\OA-20 (Mesenchymal Stem Cells) Cycling Data Summary.csv	D12d5	hsa-miR-629	Target	MSC23		25.578	25.578
F:\OpenArray\Cycling Data\OA-20 (Mesenchymal Stem Cells) Cycling Data Summary.csv	C4b2	dme-miR-7	Candidate Control	MSC18		27.758	27.758
F:\OpenArray\Cycling Data\OA-20 (Mesenchymal Stem Cells) Cycling Data Summary.csv	B5f2	hsa-miR-629	Target	MSC22		30.255	30
F:\OpenArray\Cycling Data\OA-20 (Mesenchymal Stem Cells) Cycling Data Summary.csv	D8d5	hsa-miR-629	Target	MSC22		25.744	25.744
F:\OpenArray\Cycling Data\OA-20 (Mesenchymal Stem Cells) Cycling Data Summary.csv	C8b2	dme-miR-7	Candidate Control	MSC19		26.38	26.38
F:\OpenArray\Cycling Data\OA-20 (Mesenchymal Stem Cells) Cycling Data Summary.csv	B1f2	hsa-miR-629	Target	MSC21		25.655	25.655
F:\OpenArray\Cycling Data\OA-20 (Mesenchymal Stem Cells) Cycling Data Summary.csv	D4d5	hsa-miR-629	Target	MSC21		24.403	24.403
F:\OpenArray\Cycling Data\OA-20 (Mesenchymal Stem Cells) Cycling Data Summary.csv	D12d5	hsa-miR-629	Target	MSC20		25.069	25.069
F:\OpenArray\Cycling Data\OA-20 (Mesenchymal Stem Cells) Cycling Data Summary.csv	D12d5	hsa-miR-629	Target	MSC17		27.469	27.469
F:\OpenArray\Cycling Data\OA-20 (Mesenchymal Stem Cells) Cycling Data Summary.csv	D4d5	hsa-miR-629	Target	MSC18		24.879	24.879
F:\OpenArray\Cycling Data\OA-20 (Mesenchymal Stem Cells) Cycling Data Summary.csv	C8b2	dme-miR-7	Candidate Control	MSC22		25.109	25.109
F:\OpenArray\Cycling Data\OA-20 (Mesenchymal Stem Cells) Cycling Data Summary.csv	C4b2	dme-miR-7	Candidate Control	MSC21		27.072	27.072
F:\OpenArray\Cycling Data\OA-20 (Mesenchymal Stem Cells) Cycling Data Summary.csv	D8d5	hsa-miR-629	Target	MSC13		24.863	24.863
F:\OpenArray\Cycling Data\OA-20 (Mesenchymal Stem Cells) Cycling Data Summary.csv	B9f2	hsa-miR-629	Target	MSC14		27.354	27.354
F:\OpenArray\Cycling Data\OA-20 (Mesenchymal Stem Cells) Cycling Data Summary.csv	B1f2	hsa-miR-629	Target	MSC15		30.969	30
F:\OpenArray\Cycling Data\OA-20 (Mesenchymal Stem Cells) Cycling Data Summary.csv	D4d5	hsa-miR-629	Target	MSC15		26.038	26.038
F:\OpenArray\Cycling Data\OA-20 (Mesenchymal Stem Cells) Cycling Data Summary.csv	D8d5	hsa-miR-629	Target	MSC16		24.733	24.733
F:\OpenArray\Cycling Data\OA-20 (Mesenchymal Stem Cells) Cycling Data Summary.csv	B5f2	hsa-miR-629	Target	MSC10		26.518	26.518
F:\OpenArray\Cycling Data\OA-20 (Mesenchymal Stem Cells) Cycling Data Summary.csv	B1f2	hsa-miR-629	Target	MSC12		26.582	26.582
F:\OpenArray\Cycling Data\OA-20 (Mesenchymal Stem Cells) Cycling Data Summary.csv	D4d5	hsa-miR-629	Target	MSC12		23.674	23.674
F:\OpenArray\Cycling Data\OA-20 (Mesenchymal Stem Cells) Cycling Data Summary.csv	C8b2	dme-miR-7	Candidate Control	MSC28		25.754	25.754
F:\OpenArray\Cycling Data\OA-20 (Mesenchymal Stem Cells) Cycling Data Summary.csv	C12b2	dme-miR-7	Candidate Control	MSC29		26.055	26.055
F:\OpenArray\Cycling Data\OA-20 (Mesenchymal Stem Cells) Cycling Data Summary.csv	A12a7	hsa-miR-27b#	Target	MSC14		22.992	22.992
F:\OpenArray\Cycling Data\OA-20 (Mesenchymal Stem Cells) Cycling Data Summary.csv	A4a7	hsa-miR-27b#	Target	MSC15		21.73	21.73
F:\OpenArray\Cycling Data\OA-20 (Mesenchymal Stem Cells) Cycling Data Summary.csv	A8a7	hsa-miR-27b#	Target	MSC16		21.363	21.363
F:\OpenArray\Cycling Data\OA-20 (Mesenchymal Stem Cells) Cycling Data Summary.csv	D8e7	hsa-miR-516-3p	Target	MSC25		29.63	29.63
F:\OpenArray\Cycling Data\OA-20 (Mesenchymal Stem Cells) Cycling Data Summary.csv	A12a7	hsa-miR-27b#	Target	MSC17		23.407	23.407
F:\OpenArray\Cycling Data\OA-20 (Mesenchymal Stem Cells) Cycling Data Summary.csv	A8a7	hsa-miR-27b#	Target	MSC10		23.413	23.413
F:\OpenArray\Cycling Data\OA-20 (Mesenchymal Stem Cells) Cycling Data Summary.csv	D4e7	hsa-miR-516-3p	Target	MSC27		31.03	30
F:\OpenArray\Cycling Data\OA-20 (Mesenchymal Stem Cells) Cycling Data Summary.csv	A12a7	hsa-miR-27b#	Target	MSC11		23.708	23.708
F:\OpenArray\Cycling Data\OA-20 (Mesenchymal Stem Cells) Cycling Data Summary.csv	D8e7	hsa-miR-516-3p	Target	MSC28		29.869	29.869
F:\OpenArray\Cycling Data\OA-20 (Mesenchymal Stem Cells) Cycling Data Summary.csv	D12e7	hsa-miR-516-3p	Target	MSC29		31.038	30
F:\OpenArray\Cycling Data\OA-20 (Mesenchymal Stem Cells) Cycling Data Summary.csv	A4a7	hsa-miR-27b#	Target	MSC12		22.106	22.106
F:\OpenArray\Cycling Data\OA-20 (Mesenchymal Stem Cells) Cycling Data Summary.csv	A8a7	hsa-miR-27b#	Target	MSC13		21.824	21.824
F:\OpenArray\Cycling Data\OA-20 (Mesenchymal Stem Cells) Cycling Data Summary.csv	A8a7	hsa-miR-27b#	Target	MSC19		21.491	21.491
F:\OpenArray\Cycling Data\OA-20 (Mesenchymal Stem Cells) Cycling Data Summary.csv	A4a7	hsa-miR-27b#	Target	MSC18		23.856	23.856
F:\OpenArray\Cycling Data\OA-20 (Mesenchymal Stem Cells) Cycling Data Summary.csv	C5b2	hsa-miR-376a	Target	MSC10		19.657	19.657
F:\OpenArray\Cycling Data\OA-20 (Mesenchymal Stem Cells) Cycling Data Summary.csv	A2e6	hsa-miR-885-5p	Target	MSC6		24.107	24.107
F:\OpenArray\Cycling Data\OA-20 (Mesenchymal Stem Cells) Cycling Data Summary.csv	C1b2	hsa-miR-376a	Target	MSC12		24.112	24.112
F:\OpenArray\Cycling Data\OA-20 (Mesenchymal Stem Cells) Cycling Data Summary.csv	A6e6	hsa-miR-885-5p	Target	MSC7		25.031	25.031
F:\OpenArray\Cycling Data\OA-20 (Mesenchymal Stem Cells) Cycling Data Summary.csv	C9b2	hsa-miR-376a	Target	MSC11		20.386	20.386
F:\OpenArray\Cycling Data\OA-20 (Mesenchymal Stem Cells) Cycling Data Summary.csv	A12a7	hsa-miR-27b#	Target	MSC20		22.16	22.16
F:\OpenArray\Cycling Data\OA-20 (Mesenchymal Stem Cells) Cycling Data Summary.csv	A6e6	hsa-miR-885-5p	Target	MSC4		28.107	28.107
F:\OpenArray\Cycling Data\OA-20 (Mesenchymal Stem Cells) Cycling Data Summary.csv	C9b2	hsa-miR-376a	Target	MSC14		22.467	22.467
F:\OpenArray\Cycling Data\OA-20 (Mesenchymal Stem Cells) Cycling Data Summary.csv	C5b2	hsa-miR-376a	Target	MSC13		21.984	21.984
F:\OpenArray\Cycling Data\OA-20 (Mesenchymal Stem Cells) Cycling Data Summary.csv	C5b2	hsa-miR-376a	Target	MSC16		19.631	19.631
F:\OpenArray\Cycling Data\OA-20 (Mesenchymal Stem Cells) Cycling Data Summary.csv	C1b2	hsa-miR-376a	Target	MSC15		19.289	19.289
F:\OpenArray\Cycling Data\OA-20 (Mesenchymal Stem Cells) Cycling Data Summary.csv	A10e6	hsa-miR-885-5p	Target	MSC8		24.213	24.213
F:\OpenArray\Cycling Data\OA-20 (Mesenchymal Stem Cells) Cycling Data Summary.csv	C1b2	hsa-miR-376a	Target	MSC18		27.377	27.377
F:\OpenArray\Cycling Data\OA-20 (Mesenchymal Stem Cells) Cycling Data Summary.csv	A2e6	hsa-miR-885-5p	Target	MSC9		22.332	22.332
F:\OpenArray\Cycling Data\OA-20 (Mesenchymal Stem Cells) Cycling Data Summary.csv	C9b2	hsa-miR-376a	Target	MSC17		19.595	19.595
F:\OpenArray\Cycling Data\OA-20 (Mesenchymal Stem Cells) Cycling Data Summary.csv	A4a7	hsa-miR-27b#	Target	MSC27		23.337	23.337
F:\OpenArray\Cycling Data\OA-20 (Mesenchymal Stem Cells) Cycling Data Summary.csv	C5b2	hsa-miR-376a	Target	MSC19		20.894	20.894
F:\OpenArray\Cycling Data\OA-20 (Mesenchymal Stem Cells) Cycling Data Summary.csv	A8a7	hsa-miR-27b#	Target	MSC28		21.9	21.9
F:\OpenArray\Cycling Data\OA-20 (Mesenchymal Stem Cells) Cycling Data Summary.csv	A8a7	hsa-miR-27b#	Target	MSC25		22.602	22.602
F:\OpenArray\Cycling Data\OA-20 (Mesenchymal Stem Cells) Cycling Data Summary.csv	A12a7	hsa-miR-27b#	Target	MSC26		24.795	24.795
F:\OpenArray\Cycling Data\OA-20 (Mesenchymal Stem Cells) Cycling Data Summary.csv	A10e6	hsa-miR-885-5p	Target	MSC2		25.561	25.561
F:\OpenArray\Cycling Data\OA-20 (Mesenchymal Stem Cells) Cycling Data Summary.csv	A12a7	hsa-miR-27b#	Target	MSC23		25.477	25.477
F:\OpenArray\Cycling Data\OA-20 (Mesenchymal Stem Cells) Cycling Data Summary.csv	A2e6	hsa-miR-885-5p	Target	MSC3		23.038	23.038
F:\OpenArray\Cycling Data\OA-20 (Mesenchymal Stem Cells) Cycling Data Summary.csv	A4a7	hsa-miR-27b#	Target	MSC24		21.701	21.701
F:\OpenArray\Cycling Data\OA-20 (Mesenchymal Stem Cells) Cycling Data Summary.csv	A4a7	hsa-miR-27b#	Target	MSC21		20.471	20.471
F:\OpenArray\Cycling Data\OA-20 (Mesenchymal Stem Cells) Cycling Data Summary.csv	A8a7	hsa-miR-27b#	Target	MSC22		20.743	20.743
F:\OpenArray\Cycling Data\OA-20 (Mesenchymal Stem Cells) Cycling Data Summary.csv	A12a7	hsa-miR-27b#	Target	MSC29		21.866	21.866
F:\OpenArray\Cycling Data\OA-20 (Mesenchymal Stem Cells) Cycling Data Summary.csv	C9b2	hsa-miR-376a	Target	MSC20		21.938	21.938
F:\OpenArray\Cycling Data\OA-20 (Mesenchymal Stem Cells) Cycling Data Summary.csv	C1b2	hsa-miR-376a	Target	MSC21		17.681	17.681
F:\OpenArray\Cycling Data\OA-20 (Mesenchymal Stem Cells) Cycling Data Summary.csv	B2b6	hsa-miR-369-5p	Target	MSC6		29.107	29.107
F:\OpenArray\Cycling Data\OA-20 (Mesenchymal Stem Cells) Cycling Data Summary.csv	C7a3	hsa-miR-377#	Target	MSC13		30.49	30
F:\OpenArray\Cycling Data\OA-20 (Mesenchymal Stem Cells) Cycling Data Summary.csv	B10b6	hsa-miR-369-5p	Target	MSC8		30.207	30
F:\OpenArray\Cycling Data\OA-20 (Mesenchymal Stem Cells) Cycling Data Summary.csv	C3a3	hsa-miR-377#	Target	MSC15		30.276	30
F:\OpenArray\Cycling Data\OA-20 (Mesenchymal Stem Cells) Cycling Data Summary.csv	B6b6	hsa-miR-369-5p	Target	MSC7		25.974	25.974
F:\OpenArray\Cycling Data\OA-20 (Mesenchymal Stem Cells) Cycling Data Summary.csv	C11a3	hsa-miR-377#	Target	MSC14		30.534	30
F:\OpenArray\Cycling Data\OA-20 (Mesenchymal Stem Cells) Cycling Data Summary.csv	C11a3	hsa-miR-377#	Target	MSC17		28.108	28.108
F:\OpenArray\Cycling Data\OA-20 (Mesenchymal Stem Cells) Cycling Data Summary.csv	B2b6	hsa-miR-369-5p	Target	MSC9		26.205	26.205
F:\OpenArray\Cycling Data\OA-20 (Mesenchymal Stem Cells) Cycling Data Summary.csv	C7a3	hsa-miR-377#	Target	MSC19		28.413	28.413
F:\OpenArray\Cycling Data\OA-20 (Mesenchymal Stem Cells) Cycling Data Summary.csv	B10g5	mmu-miR-491	Target	MSC29		18.803	18.803
F:\OpenArray\Cycling Data\OA-20 (Mesenchymal Stem Cells) Cycling Data Summary.csv	B6g5	mmu-miR-491	Target	MSC28		20.449	20.449
F:\OpenArray\Cycling Data\OA-20 (Mesenchymal Stem Cells) Cycling Data Summary.csv	B2g5	mmu-miR-491	Target	MSC27		20.934	20.934
F:\OpenArray\Cycling Data\OA-20 (Mesenchymal Stem Cells) Cycling Data Summary.csv	B10g5	mmu-miR-491	Target	MSC26		21.955	21.955
F:\OpenArray\Cycling Data\OA-20 (Mesenchymal Stem Cells) Cycling Data Summary.csv	B10b6	hsa-miR-369-5p	Target	MSC2		28.133	28.133
F:\OpenArray\Cycling Data\OA-20 (Mesenchymal Stem Cells) Cycling Data Summary.csv	B6g5	mmu-miR-491	Target	MSC25		21.159	21.159
F:\OpenArray\Cycling Data\OA-20 (Mesenchymal Stem Cells) Cycling Data Summary.csv	B2g5	mmu-miR-491	Target	MSC24		20.008	20.008
F:\OpenArray\Cycling Data\OA-20 (Mesenchymal Stem Cells) Cycling Data Summary.csv	B6b6	hsa-miR-369-5p	Target	MSC4		26.772	26.772
F:\OpenArray\Cycling Data\OA-20 (Mesenchymal Stem Cells) Cycling Data Summary.csv	B10g5	mmu-miR-491	Target	MSC23		21.808	21.808
F:\OpenArray\Cycling Data\OA-20 (Mesenchymal Stem Cells) Cycling Data Summary.csv	B2b6	hsa-miR-369-5p	Target	MSC3		27.713	27.713
F:\OpenArray\Cycling Data\OA-20 (Mesenchymal Stem Cells) Cycling Data Summary.csv	B6g5	mmu-miR-491	Target	MSC22		20.408	20.408
F:\OpenArray\Cycling Data\OA-20 (Mesenchymal Stem Cells) Cycling Data Summary.csv	B7c7	hsa-miR-181a-2#	Target	MSC19		23.141	23.141
F:\OpenArray\Cycling Data\OA-20 (Mesenchymal Stem Cells) Cycling Data Summary.csv	B11c7	hsa-miR-181a-2#	Target	MSC17		24.332	24.332
F:\OpenArray\Cycling Data\OA-20 (Mesenchymal Stem Cells) Cycling Data Summary.csv	B3c7	hsa-miR-181a-2#	Target	MSC18		23.565	23.565
F:\OpenArray\Cycling Data\OA-20 (Mesenchymal Stem Cells) Cycling Data Summary.csv	B3c7	hsa-miR-181a-2#	Target	MSC15		22.179	22.179
F:\OpenArray\Cycling Data\OA-20 (Mesenchymal Stem Cells) Cycling Data Summary.csv	B7c7	hsa-miR-181a-2#	Target	MSC16		22.788	22.788
F:\OpenArray\Cycling Data\OA-20 (Mesenchymal Stem Cells) Cycling Data Summary.csv	B7c7	hsa-miR-181a-2#	Target	MSC13		24.442	24.442
F:\OpenArray\Cycling Data\OA-20 (Mesenchymal Stem Cells) Cycling Data Summary.csv	B11c7	hsa-miR-181a-2#	Target	MSC14		23.972	23.972
F:\OpenArray\Cycling Data\OA-20 (Mesenchymal Stem Cells) Cycling Data Summary.csv	B11c7	hsa-miR-181a-2#	Target	MSC11		24.802	24.802
F:\OpenArray\Cycling Data\OA-20 (Mesenchymal Stem Cells) Cycling Data Summary.csv	B3c7	hsa-miR-181a-2#	Target	MSC12		24.053	24.053
F:\OpenArray\Cycling Data\OA-20 (Mesenchymal Stem Cells) Cycling Data Summary.csv	B7c7	hsa-miR-181a-2#	Target	MSC10		24.04	24.04
F:\OpenArray\Cycling Data\OA-20 (Mesenchymal Stem Cells) Cycling Data Summary.csv	C3a3	hsa-miR-377#	Target	MSC21		29.329	29.329
F:\OpenArray\Cycling Data\OA-20 (Mesenchymal Stem Cells) Cycling Data Summary.csv	C7a3	hsa-miR-377#	Target	MSC22		27.616	27.616
F:\OpenArray\Cycling Data\OA-20 (Mesenchymal Stem Cells) Cycling Data Summary.csv	C1c8	hsa-miR-29c	Target	MSC9		16.968	16.968
F:\OpenArray\Cycling Data\OA-20 (Mesenchymal Stem Cells) Cycling Data Summary.csv	B11c7	hsa-miR-181a-2#	Target	MSC26		23.824	23.824
F:\OpenArray\Cycling Data\OA-20 (Mesenchymal Stem Cells) Cycling Data Summary.csv	B3c7	hsa-miR-181a-2#	Target	MSC27		22.281	22.281
F:\OpenArray\Cycling Data\OA-20 (Mesenchymal Stem Cells) Cycling Data Summary.csv	C5c8	hsa-miR-29c	Target	MSC7		16.996	16.996
F:\OpenArray\Cycling Data\OA-20 (Mesenchymal Stem Cells) Cycling Data Summary.csv	B7c7	hsa-miR-181a-2#	Target	MSC28		21.913	21.913
F:\OpenArray\Cycling Data\OA-20 (Mesenchymal Stem Cells) Cycling Data Summary.csv	C9c8	hsa-miR-29c	Target	MSC8		17.762	17.762
F:\OpenArray\Cycling Data\OA-20 (Mesenchymal Stem Cells) Cycling Data Summary.csv	B11c7	hsa-miR-181a-2#	Target	MSC29		20.603	20.603
F:\OpenArray\Cycling Data\OA-20 (Mesenchymal Stem Cells) Cycling Data Summary.csv	C9c8	hsa-miR-29c	Target	MSC5		22.517	22.517
F:\OpenArray\Cycling Data\OA-20 (Mesenchymal Stem Cells) Cycling Data Summary.csv	B7c7	hsa-miR-181a-2#	Target	MSC22		21.107	21.107
F:\OpenArray\Cycling Data\OA-20 (Mesenchymal Stem Cells) Cycling Data Summary.csv	C1c8	hsa-miR-29c	Target	MSC6		16.336	16.336
F:\OpenArray\Cycling Data\OA-20 (Mesenchymal Stem Cells) Cycling Data Summary.csv	B11c7	hsa-miR-181a-2#	Target	MSC23		23.315	23.315
F:\OpenArray\Cycling Data\OA-20 (Mesenchymal Stem Cells) Cycling Data Summary.csv	C1c8	hsa-miR-29c	Target	MSC3		15.053	15.053
F:\OpenArray\Cycling Data\OA-20 (Mesenchymal Stem Cells) Cycling Data Summary.csv	B3c7	hsa-miR-181a-2#	Target	MSC24		21.826	21.826
F:\OpenArray\Cycling Data\OA-20 (Mesenchymal Stem Cells) Cycling Data Summary.csv	C5c8	hsa-miR-29c	Target	MSC4		16.278	16.278
F:\OpenArray\Cycling Data\OA-20 (Mesenchymal Stem Cells) Cycling Data Summary.csv	B7c7	hsa-miR-181a-2#	Target	MSC25		22.124	22.124
F:\OpenArray\Cycling Data\OA-20 (Mesenchymal Stem Cells) Cycling Data Summary.csv	C7a3	hsa-miR-377#	Target	MSC10		28.978	28.978
F:\OpenArray\Cycling Data\OA-20 (Mesenchymal Stem Cells) Cycling Data Summary.csv	C11a3	hsa-miR-377#	Target	MSC11		31.039	30
F:\OpenArray\Cycling Data\OA-20 (Mesenchymal Stem Cells) Cycling Data Summary.csv	C9c8	hsa-miR-29c	Target	MSC2		16.901	16.901
F:\OpenArray\Cycling Data\OA-20 (Mesenchymal Stem Cells) Cycling Data Summary.csv	B11c7	hsa-miR-181a-2#	Target	MSC20		22.562	22.562
F:\OpenArray\Cycling Data\OA-20 (Mesenchymal Stem Cells) Cycling Data Summary.csv	B3c7	hsa-miR-181a-2#	Target	MSC21		21.359	21.359
F:\OpenArray\Cycling Data\OA-20 (Mesenchymal Stem Cells) Cycling Data Summary.csv	B6g5	mmu-miR-491	Target	MSC10		21.647	21.647
F:\OpenArray\Cycling Data\OA-20 (Mesenchymal Stem Cells) Cycling Data Summary.csv	B6g5	mmu-miR-491	Target	MSC19		20.694	20.694
F:\OpenArray\Cycling Data\OA-20 (Mesenchymal Stem Cells) Cycling Data Summary.csv	B2g5	mmu-miR-491	Target	MSC12		21.663	21.663
F:\OpenArray\Cycling Data\OA-20 (Mesenchymal Stem Cells) Cycling Data Summary.csv	B10g5	mmu-miR-491	Target	MSC11		21.845	21.845
F:\OpenArray\Cycling Data\OA-20 (Mesenchymal Stem Cells) Cycling Data Summary.csv	B10g5	mmu-miR-491	Target	MSC14		21.608	21.608
F:\OpenArray\Cycling Data\OA-20 (Mesenchymal Stem Cells) Cycling Data Summary.csv	B6g5	mmu-miR-491	Target	MSC13		20.715	20.715
F:\OpenArray\Cycling Data\OA-20 (Mesenchymal Stem Cells) Cycling Data Summary.csv	B6g5	mmu-miR-491	Target	MSC16		20.507	20.507
F:\OpenArray\Cycling Data\OA-20 (Mesenchymal Stem Cells) Cycling Data Summary.csv	B2g5	mmu-miR-491	Target	MSC15		20.412	20.412
F:\OpenArray\Cycling Data\OA-20 (Mesenchymal Stem Cells) Cycling Data Summary.csv	B2g5	mmu-miR-491	Target	MSC18		21.211	21.211
F:\OpenArray\Cycling Data\OA-20 (Mesenchymal Stem Cells) Cycling Data Summary.csv	B10g5	mmu-miR-491	Target	MSC17		21.154	21.154
F:\OpenArray\Cycling Data\OA-20 (Mesenchymal Stem Cells) Cycling Data Summary.csv	C9c3	hsa-miR-449b	Target	MSC29		26.476	26.476
F:\OpenArray\Cycling Data\OA-20 (Mesenchymal Stem Cells) Cycling Data Summary.csv	A9a6	hsa-miR-485-3p	Target	MSC20		26.798	26.798
F:\OpenArray\Cycling Data\OA-20 (Mesenchymal Stem Cells) Cycling Data Summary.csv	A1a6	hsa-miR-485-3p	Target	MSC21		21.698	21.698
F:\OpenArray\Cycling Data\OA-20 (Mesenchymal Stem Cells) Cycling Data Summary.csv	B10g5	mmu-miR-491	Target	MSC20		20.651	20.651
F:\OpenArray\Cycling Data\OA-20 (Mesenchymal Stem Cells) Cycling Data Summary.csv	A5a6	hsa-miR-485-3p	Target	MSC22		22.775	22.775
F:\OpenArray\Cycling Data\OA-20 (Mesenchymal Stem Cells) Cycling Data Summary.csv	C1c3	hsa-miR-449b	Target	MSC27		30.422	30
F:\OpenArray\Cycling Data\OA-20 (Mesenchymal Stem Cells) Cycling Data Summary.csv	B2g5	mmu-miR-491	Target	MSC21		19.639	19.639
F:\OpenArray\Cycling Data\OA-20 (Mesenchymal Stem Cells) Cycling Data Summary.csv	A9a6	hsa-miR-485-3p	Target	MSC23		23.605	23.605
F:\OpenArray\Cycling Data\OA-20 (Mesenchymal Stem Cells) Cycling Data Summary.csv	C1c3	hsa-miR-449b	Target	MSC21		28.039	28.039
F:\OpenArray\Cycling Data\OA-20 (Mesenchymal Stem Cells) Cycling Data Summary.csv	A1a6	hsa-miR-485-3p	Target	MSC24		21.021	21.021
F:\OpenArray\Cycling Data\OA-20 (Mesenchymal Stem Cells) Cycling Data Summary.csv	A5a6	hsa-miR-485-3p	Target	MSC25		21.32	21.32
F:\OpenArray\Cycling Data\OA-20 (Mesenchymal Stem Cells) Cycling Data Summary.csv	C9c3	hsa-miR-449b	Target	MSC23		28.349	28.349
F:\OpenArray\Cycling Data\OA-20 (Mesenchymal Stem Cells) Cycling Data Summary.csv	A9a6	hsa-miR-485-3p	Target	MSC26		24.488	24.488
F:\OpenArray\Cycling Data\OA-20 (Mesenchymal Stem Cells) Cycling Data Summary.csv	C5c3	hsa-miR-449b	Target	MSC22		27.291	27.291
F:\OpenArray\Cycling Data\OA-20 (Mesenchymal Stem Cells) Cycling Data Summary.csv	A1a6	hsa-miR-485-3p	Target	MSC27		22.331	22.331
F:\OpenArray\Cycling Data\OA-20 (Mesenchymal Stem Cells) Cycling Data Summary.csv	A5a6	hsa-miR-485-3p	Target	MSC28		22.397	22.397
F:\OpenArray\Cycling Data\OA-20 (Mesenchymal Stem Cells) Cycling Data Summary.csv	A9a6	hsa-miR-485-3p	Target	MSC29		22.974	22.974
F:\OpenArray\Cycling Data\OA-20 (Mesenchymal Stem Cells) Cycling Data Summary.csv	C10f3	hsa-miR-122	Target	MSC23		25.183	25.183
F:\OpenArray\Cycling Data\OA-20 (Mesenchymal Stem Cells) Cycling Data Summary.csv	C2f3	hsa-miR-122	Target	MSC24		22.847	22.847
F:\OpenArray\Cycling Data\OA-20 (Mesenchymal Stem Cells) Cycling Data Summary.csv	C9c3	hsa-miR-449b	Target	MSC11		27.342	27.342
F:\OpenArray\Cycling Data\OA-20 (Mesenchymal Stem Cells) Cycling Data Summary.csv	C5c3	hsa-miR-449b	Target	MSC16		29.705	29.705
F:\OpenArray\Cycling Data\OA-20 (Mesenchymal Stem Cells) Cycling Data Summary.csv	C5c3	hsa-miR-449b	Target	MSC13		28.324	28.324
F:\OpenArray\Cycling Data\OA-20 (Mesenchymal Stem Cells) Cycling Data Summary.csv	C9c3	hsa-miR-449b	Target	MSC14		27.526	27.526
F:\OpenArray\Cycling Data\OA-20 (Mesenchymal Stem Cells) Cycling Data Summary.csv	C9c3	hsa-miR-449b	Target	MSC17		27.194	27.194
F:\OpenArray\Cycling Data\OA-20 (Mesenchymal Stem Cells) Cycling Data Summary.csv	A1c8	hsa-miR-302c	Target	MSC6		28.769	28.769
F:\OpenArray\Cycling Data\OA-20 (Mesenchymal Stem Cells) Cycling Data Summary.csv	C2f3	hsa-miR-122	Target	MSC12		22.352	22.352
F:\OpenArray\Cycling Data\OA-20 (Mesenchymal Stem Cells) Cycling Data Summary.csv	C6f3	hsa-miR-122	Target	MSC10		23.503	23.503
F:\OpenArray\Cycling Data\OA-20 (Mesenchymal Stem Cells) Cycling Data Summary.csv	A1c8	hsa-miR-302c	Target	MSC3		28.346	28.346
F:\OpenArray\Cycling Data\OA-20 (Mesenchymal Stem Cells) Cycling Data Summary.csv	C10g6	mmu-miR-187	Target	MSC11		25.344	25.344
F:\OpenArray\Cycling Data\OA-20 (Mesenchymal Stem Cells) Cycling Data Summary.csv	C11a3	hsa-miR-377#	Target	MSC29		26.951	26.951
F:\OpenArray\Cycling Data\OA-20 (Mesenchymal Stem Cells) Cycling Data Summary.csv	C3a3	hsa-miR-377#	Target	MSC27		31.203	30
F:\OpenArray\Cycling Data\OA-20 (Mesenchymal Stem Cells) Cycling Data Summary.csv	C7a3	hsa-miR-377#	Target	MSC28		28.65	28.65
F:\OpenArray\Cycling Data\OA-20 (Mesenchymal Stem Cells) Cycling Data Summary.csv	C7a3	hsa-miR-377#	Target	MSC25		28.346	28.346
F:\OpenArray\Cycling Data\OA-20 (Mesenchymal Stem Cells) Cycling Data Summary.csv	C11a3	hsa-miR-377#	Target	MSC26		30.043	30
F:\OpenArray\Cycling Data\OA-20 (Mesenchymal Stem Cells) Cycling Data Summary.csv	C5a6	hsa-miR-302a	Target	MSC19		27.937	27.937
F:\OpenArray\Cycling Data\OA-20 (Mesenchymal Stem Cells) Cycling Data Summary.csv	B9f6	hsa-miR-615-5p	Target	MSC20		25.834	25.834
F:\OpenArray\Cycling Data\OA-20 (Mesenchymal Stem Cells) Cycling Data Summary.csv	C1a6	hsa-miR-302a	Target	MSC15		28.344	28.344
F:\OpenArray\Cycling Data\OA-20 (Mesenchymal Stem Cells) Cycling Data Summary.csv	C9a6	hsa-miR-302a	Target	MSC11		27.669	27.669
F:\OpenArray\Cycling Data\OA-20 (Mesenchymal Stem Cells) Cycling Data Summary.csv	B1f6	hsa-miR-615-5p	Target	MSC18		28.521	28.521
F:\OpenArray\Cycling Data\OA-20 (Mesenchymal Stem Cells) Cycling Data Summary.csv	B5f6	hsa-miR-615-5p	Target	MSC13		27.59	27.59
F:\OpenArray\Cycling Data\OA-20 (Mesenchymal Stem Cells) Cycling Data Summary.csv	B9f6	hsa-miR-615-5p	Target	MSC11		26.2	26.2
F:\OpenArray\Cycling Data\OA-20 (Mesenchymal Stem Cells) Cycling Data Summary.csv	B5f6	hsa-miR-615-5p	Target	MSC16		29.065	29.065
F:\OpenArray\Cycling Data\OA-20 (Mesenchymal Stem Cells) Cycling Data Summary.csv	B1f6	hsa-miR-615-5p	Target	MSC15		27.255	27.255
F:\OpenArray\Cycling Data\OA-20 (Mesenchymal Stem Cells) Cycling Data Summary.csv	C5a6	hsa-miR-302a	Target	MSC28		26.796	26.796
F:\OpenArray\Cycling Data\OA-20 (Mesenchymal Stem Cells) Cycling Data Summary.csv	C1a6	hsa-miR-302a	Target	MSC27		27.646	27.646
F:\OpenArray\Cycling Data\OA-20 (Mesenchymal Stem Cells) Cycling Data Summary.csv	C9a6	hsa-miR-302a	Target	MSC29		28.318	28.318
F:\OpenArray\Cycling Data\OA-20 (Mesenchymal Stem Cells) Cycling Data Summary.csv	C5a6	hsa-miR-302a	Target	MSC25		28.084	28.084
F:\OpenArray\Cycling Data\OA-20 (Mesenchymal Stem Cells) Cycling Data Summary.csv	C9a6	hsa-miR-302a	Target	MSC20		27.036	27.036
F:\OpenArray\Cycling Data\OA-20 (Mesenchymal Stem Cells) Cycling Data Summary.csv	C5a6	hsa-miR-302a	Target	MSC22		25.82	25.82
F:\OpenArray\Cycling Data\OA-20 (Mesenchymal Stem Cells) Cycling Data Summary.csv	C1a6	hsa-miR-302a	Target	MSC21		26.392	26.392
F:\OpenArray\Cycling Data\OA-20 (Mesenchymal Stem Cells) Cycling Data Summary.csv	A5d6	hsa-miR-140-3p	Target	MSC25		23.277	23.277
F:\OpenArray\Cycling Data\OA-20 (Mesenchymal Stem Cells) Cycling Data Summary.csv	A1d6	hsa-miR-140-3p	Target	MSC24		21.397	21.397
F:\OpenArray\Cycling Data\OA-20 (Mesenchymal Stem Cells) Cycling Data Summary.csv	A1d6	hsa-miR-140-3p	Target	MSC27		23.014	23.014
F:\OpenArray\Cycling Data\OA-20 (Mesenchymal Stem Cells) Cycling Data Summary.csv	A9d6	hsa-miR-140-3p	Target	MSC26		25.271	25.271
F:\OpenArray\Cycling Data\OA-20 (Mesenchymal Stem Cells) Cycling Data Summary.csv	A1d6	hsa-miR-140-3p	Target	MSC21		19.685	19.685
F:\OpenArray\Cycling Data\OA-20 (Mesenchymal Stem Cells) Cycling Data Summary.csv	A9d6	hsa-miR-140-3p	Target	MSC20		23.073	23.073
F:\OpenArray\Cycling Data\OA-20 (Mesenchymal Stem Cells) Cycling Data Summary.csv	A9d6	hsa-miR-140-3p	Target	MSC23		24.231	24.231
F:\OpenArray\Cycling Data\OA-20 (Mesenchymal Stem Cells) Cycling Data Summary.csv	A5d6	hsa-miR-140-3p	Target	MSC22		21.448	21.448
F:\OpenArray\Cycling Data\OA-20 (Mesenchymal Stem Cells) Cycling Data Summary.csv	A9d6	hsa-miR-140-3p	Target	MSC29		20.264	20.264
F:\OpenArray\Cycling Data\OA-20 (Mesenchymal Stem Cells) Cycling Data Summary.csv	A5d6	hsa-miR-140-3p	Target	MSC28		22.1	22.1
F:\OpenArray\Cycling Data\OA-20 (Mesenchymal Stem Cells) Cycling Data Summary.csv	A1d6	hsa-miR-140-3p	Target	MSC12		26.158	26.158
F:\OpenArray\Cycling Data\OA-20 (Mesenchymal Stem Cells) Cycling Data Summary.csv	A5d6	hsa-miR-140-3p	Target	MSC16		22.826	22.826
F:\OpenArray\Cycling Data\OA-20 (Mesenchymal Stem Cells) Cycling Data Summary.csv	A1d6	hsa-miR-140-3p	Target	MSC15		21.209	21.209
F:\OpenArray\Cycling Data\OA-20 (Mesenchymal Stem Cells) Cycling Data Summary.csv	A9d6	hsa-miR-140-3p	Target	MSC14		25.148	25.148
F:\OpenArray\Cycling Data\OA-20 (Mesenchymal Stem Cells) Cycling Data Summary.csv	B3d8	hsa-miR-93#	Target	MSC6		24.404	24.404
F:\OpenArray\Cycling Data\OA-20 (Mesenchymal Stem Cells) Cycling Data Summary.csv	B7d8	hsa-miR-93#	Target	MSC7		22.138	22.138
F:\OpenArray\Cycling Data\OA-20 (Mesenchymal Stem Cells) Cycling Data Summary.csv	A5d6	hsa-miR-140-3p	Target	MSC19		23.02	23.02
F:\OpenArray\Cycling Data\OA-20 (Mesenchymal Stem Cells) Cycling Data Summary.csv	B11d8	hsa-miR-93#	Target	MSC8		23.31	23.31
F:\OpenArray\Cycling Data\OA-20 (Mesenchymal Stem Cells) Cycling Data Summary.csv	A1d6	hsa-miR-140-3p	Target	MSC18		23.196	23.196
F:\OpenArray\Cycling Data\OA-20 (Mesenchymal Stem Cells) Cycling Data Summary.csv	B3d8	hsa-miR-93#	Target	MSC9		23.135	23.135
F:\OpenArray\Cycling Data\OA-20 (Mesenchymal Stem Cells) Cycling Data Summary.csv	A9d6	hsa-miR-140-3p	Target	MSC17		24.177	24.177
F:\OpenArray\Cycling Data\OA-20 (Mesenchymal Stem Cells) Cycling Data Summary.csv	B11d8	hsa-miR-93#	Target	MSC2		22.25	22.25
F:\OpenArray\Cycling Data\OA-20 (Mesenchymal Stem Cells) Cycling Data Summary.csv	B3d8	hsa-miR-93#	Target	MSC3		23.079	23.079
F:\OpenArray\Cycling Data\OA-20 (Mesenchymal Stem Cells) Cycling Data Summary.csv	B7d8	hsa-miR-93#	Target	MSC4		23.448	23.448
F:\OpenArray\Cycling Data\OA-20 (Mesenchymal Stem Cells) Cycling Data Summary.csv	B11d8	hsa-miR-93#	Target	MSC5		24.825	24.825
F:\OpenArray\Cycling Data\OA-20 (Mesenchymal Stem Cells) Cycling Data Summary.csv	D4e5	hsa-miR-505#	Target	MSC6		24.495	24.495
F:\OpenArray\Cycling Data\OA-20 (Mesenchymal Stem Cells) Cycling Data Summary.csv	D8e5	hsa-miR-505#	Target	MSC7		23.055	23.055
F:\OpenArray\Cycling Data\OA-20 (Mesenchymal Stem Cells) Cycling Data Summary.csv	D12e5	hsa-miR-505#	Target	MSC8		25.257	25.257
F:\OpenArray\Cycling Data\OA-20 (Mesenchymal Stem Cells) Cycling Data Summary.csv	D4e5	hsa-miR-505#	Target	MSC9		23.145	23.145
F:\OpenArray\Cycling Data\OA-20 (Mesenchymal Stem Cells) Cycling Data Summary.csv	D4e5	hsa-miR-505#	Target	MSC3		23.746	23.746
F:\OpenArray\Cycling Data\OA-20 (Mesenchymal Stem Cells) Cycling Data Summary.csv	B9f6	hsa-miR-615-5p	Target	MSC29		24.556	24.556
F:\OpenArray\Cycling Data\OA-20 (Mesenchymal Stem Cells) Cycling Data Summary.csv	D12e5	hsa-miR-505#	Target	MSC2		24.857	24.857
F:\OpenArray\Cycling Data\OA-20 (Mesenchymal Stem Cells) Cycling Data Summary.csv	D12e5	hsa-miR-505#	Target	MSC5		24.338	24.338
F:\OpenArray\Cycling Data\OA-20 (Mesenchymal Stem Cells) Cycling Data Summary.csv	D8e5	hsa-miR-505#	Target	MSC4		24.165	24.165
F:\OpenArray\Cycling Data\OA-20 (Mesenchymal Stem Cells) Cycling Data Summary.csv	A6c1	hsa-miR-219	Target	MSC7		28.471	28.471
F:\OpenArray\Cycling Data\OA-20 (Mesenchymal Stem Cells) Cycling Data Summary.csv	B5f6	hsa-miR-615-5p	Target	MSC28		25.407	25.407
F:\OpenArray\Cycling Data\OA-20 (Mesenchymal Stem Cells) Cycling Data Summary.csv	A2c1	hsa-miR-219	Target	MSC6		29.346	29.346
F:\OpenArray\Cycling Data\OA-20 (Mesenchymal Stem Cells) Cycling Data Summary.csv	B1f6	hsa-miR-615-5p	Target	MSC27		27.002	27.002
F:\OpenArray\Cycling Data\OA-20 (Mesenchymal Stem Cells) Cycling Data Summary.csv	B5f6	hsa-miR-615-5p	Target	MSC22		25.8	25.8
F:\OpenArray\Cycling Data\OA-20 (Mesenchymal Stem Cells) Cycling Data Summary.csv	B1f6	hsa-miR-615-5p	Target	MSC21		24.036	24.036
F:\OpenArray\Cycling Data\OA-20 (Mesenchymal Stem Cells) Cycling Data Summary.csv	D9c8	hsa-miR-331	Target	MSC5		22.219	22.219
F:\OpenArray\Cycling Data\OA-20 (Mesenchymal Stem Cells) Cycling Data Summary.csv	D5c8	hsa-miR-331	Target	MSC4		17.564	17.564
F:\OpenArray\Cycling Data\OA-20 (Mesenchymal Stem Cells) Cycling Data Summary.csv	D1c8	hsa-miR-331	Target	MSC3		15.821	15.821
F:\OpenArray\Cycling Data\OA-20 (Mesenchymal Stem Cells) Cycling Data Summary.csv	D9c8	hsa-miR-331	Target	MSC2		17.332	17.332
F:\OpenArray\Cycling Data\OA-20 (Mesenchymal Stem Cells) Cycling Data Summary.csv	D1c8	hsa-miR-331	Target	MSC9		18.111	18.111
F:\OpenArray\Cycling Data\OA-20 (Mesenchymal Stem Cells) Cycling Data Summary.csv	A10g6	hsa-miR-98	Target	MSC5		26.047	26.047
F:\OpenArray\Cycling Data\OA-20 (Mesenchymal Stem Cells) Cycling Data Summary.csv	D9c8	hsa-miR-331	Target	MSC8		17.369	17.369
F:\OpenArray\Cycling Data\OA-20 (Mesenchymal Stem Cells) Cycling Data Summary.csv	A6g6	hsa-miR-98	Target	MSC4		21.958	21.958
F:\OpenArray\Cycling Data\OA-20 (Mesenchymal Stem Cells) Cycling Data Summary.csv	D5c8	hsa-miR-331	Target	MSC7		17.623	17.623
F:\OpenArray\Cycling Data\OA-20 (Mesenchymal Stem Cells) Cycling Data Summary.csv	A6g6	hsa-miR-98	Target	MSC7		20.864	20.864
F:\OpenArray\Cycling Data\OA-20 (Mesenchymal Stem Cells) Cycling Data Summary.csv	D1c8	hsa-miR-331	Target	MSC6		17.829	17.829
F:\OpenArray\Cycling Data\OA-20 (Mesenchymal Stem Cells) Cycling Data Summary.csv	A1c1	hsa-miR-381	Target	MSC21		26.263	26.263
F:\OpenArray\Cycling Data\OA-20 (Mesenchymal Stem Cells) Cycling Data Summary.csv	A5c1	hsa-miR-381	Target	MSC22		24.572	24.572
F:\OpenArray\Cycling Data\OA-20 (Mesenchymal Stem Cells) Cycling Data Summary.csv	D5c8	hsa-miR-331	Target	MSC1		27.986	27.986
F:\OpenArray\Cycling Data\OA-20 (Mesenchymal Stem Cells) Cycling Data Summary.csv	B1c2	hsa-miR-340	Target	MSC6		22.772	22.772
F:\OpenArray\Cycling Data\OA-20 (Mesenchymal Stem Cells) Cycling Data Summary.csv	B5c2	hsa-miR-340	Target	MSC7		22.521	22.521
F:\OpenArray\Cycling Data\OA-20 (Mesenchymal Stem Cells) Cycling Data Summary.csv	B5c2	hsa-miR-340	Target	MSC4		22.926	22.926
F:\OpenArray\Cycling Data\OA-20 (Mesenchymal Stem Cells) Cycling Data Summary.csv	A5c1	hsa-miR-381	Target	MSC19		27.86	27.86
F:\OpenArray\Cycling Data\OA-20 (Mesenchymal Stem Cells) Cycling Data Summary.csv	B9c2	hsa-miR-340	Target	MSC5		28.29	28.29
F:\OpenArray\Cycling Data\OA-20 (Mesenchymal Stem Cells) Cycling Data Summary.csv	A3f8	hsa-miR-656	Target	MSC3		26.098	26.098
F:\OpenArray\Cycling Data\OA-20 (Mesenchymal Stem Cells) Cycling Data Summary.csv	A11f8	hsa-miR-656	Target	MSC2		27.005	27.005
F:\OpenArray\Cycling Data\OA-20 (Mesenchymal Stem Cells) Cycling Data Summary.csv	B9c2	hsa-miR-340	Target	MSC8		23.383	23.383
F:\OpenArray\Cycling Data\OA-20 (Mesenchymal Stem Cells) Cycling Data Summary.csv	A1c1	hsa-miR-381	Target	MSC15		26.795	26.795
F:\OpenArray\Cycling Data\OA-20 (Mesenchymal Stem Cells) Cycling Data Summary.csv	B1c2	hsa-miR-340	Target	MSC9		23.872	23.872
F:\OpenArray\Cycling Data\OA-20 (Mesenchymal Stem Cells) Cycling Data Summary.csv	B9c2	hsa-miR-340	Target	MSC2		25.215	25.215
F:\OpenArray\Cycling Data\OA-20 (Mesenchymal Stem Cells) Cycling Data Summary.csv	B1c2	hsa-miR-340	Target	MSC3		22.593	22.593
F:\OpenArray\Cycling Data\OA-20 (Mesenchymal Stem Cells) Cycling Data Summary.csv	C3c1	hsa-miR-380-5p	Target	MSC9		27.038	27.038
F:\OpenArray\Cycling Data\OA-20 (Mesenchymal Stem Cells) Cycling Data Summary.csv	C7c1	hsa-miR-380-5p	Target	MSC7		26.49	26.49
F:\OpenArray\Cycling Data\OA-20 (Mesenchymal Stem Cells) Cycling Data Summary.csv	C3c1	hsa-miR-380-5p	Target	MSC6		26.548	26.548
F:\OpenArray\Cycling Data\OA-20 (Mesenchymal Stem Cells) Cycling Data Summary.csv	C11c1	hsa-miR-380-5p	Target	MSC5		28.061	28.061
F:\OpenArray\Cycling Data\OA-20 (Mesenchymal Stem Cells) Cycling Data Summary.csv	C7c1	hsa-miR-380-5p	Target	MSC4		25.548	25.548
F:\OpenArray\Cycling Data\OA-20 (Mesenchymal Stem Cells) Cycling Data Summary.csv	C11c1	hsa-miR-380-5p	Target	MSC2		27.641	27.641
F:\OpenArray\Cycling Data\OA-20 (Mesenchymal Stem Cells) Cycling Data Summary.csv	A3f8	hsa-miR-656	Target	MSC6		25.312	25.312
F:\OpenArray\Cycling Data\OA-20 (Mesenchymal Stem Cells) Cycling Data Summary.csv	B2f3	hsa-miR-570	Target	MSC3		29.461	29.461
F:\OpenArray\Cycling Data\OA-20 (Mesenchymal Stem Cells) Cycling Data Summary.csv	A7f8	hsa-miR-656	Target	MSC7		24.473	24.473
F:\OpenArray\Cycling Data\OA-20 (Mesenchymal Stem Cells) Cycling Data Summary.csv	A3f8	hsa-miR-656	Target	MSC9		24.556	24.556
F:\OpenArray\Cycling Data\OA-20 (Mesenchymal Stem Cells) Cycling Data Summary.csv	A12a8	hsa-miR-10a#	Target	MSC17		29.431	29.431
F:\OpenArray\Cycling Data\OA-20 (Mesenchymal Stem Cells) Cycling Data Summary.csv	A9c1	hsa-miR-381	Target	MSC29		25.281	25.281
F:\OpenArray\Cycling Data\OA-20 (Mesenchymal Stem Cells) Cycling Data Summary.csv	A5c1	hsa-miR-381	Target	MSC28		25.759	25.759
F:\OpenArray\Cycling Data\OA-20 (Mesenchymal Stem Cells) Cycling Data Summary.csv	A1c1	hsa-miR-381	Target	MSC27		27.576	27.576
F:\OpenArray\Cycling Data\OA-20 (Mesenchymal Stem Cells) Cycling Data Summary.csv	A5c1	hsa-miR-381	Target	MSC25		27.383	27.383
F:\OpenArray\Cycling Data\OA-20 (Mesenchymal Stem Cells) Cycling Data Summary.csv	B12g4	mmu-let-7d#	Target	MSC8		26.731	26.731
F:\OpenArray\Cycling Data\OA-20 (Mesenchymal Stem Cells) Cycling Data Summary.csv	A9b2	hsa-miR-485-5p	Target	MSC2		22.158	22.158
F:\OpenArray\Cycling Data\OA-20 (Mesenchymal Stem Cells) Cycling Data Summary.csv	A5c7	hsa-miR-455	Target	MSC10		23.481	23.481
F:\OpenArray\Cycling Data\OA-20 (Mesenchymal Stem Cells) Cycling Data Summary.csv	A9c7	hsa-miR-455	Target	MSC11		24.182	24.182
F:\OpenArray\Cycling Data\OA-20 (Mesenchymal Stem Cells) Cycling Data Summary.csv	D2f3	hsa-miR-532	Target	MSC9		19.4	19.4
F:\OpenArray\Cycling Data\OA-20 (Mesenchymal Stem Cells) Cycling Data Summary.csv	D10f3	hsa-miR-532	Target	MSC8		20.559	20.559
F:\OpenArray\Cycling Data\OA-20 (Mesenchymal Stem Cells) Cycling Data Summary.csv	D6f3	hsa-miR-532	Target	MSC7		19.078	19.078
F:\OpenArray\Cycling Data\OA-20 (Mesenchymal Stem Cells) Cycling Data Summary.csv	A1c7	hsa-miR-455	Target	MSC18		28.359	28.359
F:\OpenArray\Cycling Data\OA-20 (Mesenchymal Stem Cells) Cycling Data Summary.csv	A5c7	hsa-miR-455	Target	MSC19		24.942	24.942
F:\OpenArray\Cycling Data\OA-20 (Mesenchymal Stem Cells) Cycling Data Summary.csv	A5c7	hsa-miR-455	Target	MSC16		24.93	24.93
F:\OpenArray\Cycling Data\OA-20 (Mesenchymal Stem Cells) Cycling Data Summary.csv	A9c7	hsa-miR-455	Target	MSC17		25.537	25.537
F:\OpenArray\Cycling Data\OA-20 (Mesenchymal Stem Cells) Cycling Data Summary.csv	A9c7	hsa-miR-455	Target	MSC14		24.607	24.607
F:\OpenArray\Cycling Data\OA-20 (Mesenchymal Stem Cells) Cycling Data Summary.csv	A1c7	hsa-miR-455	Target	MSC15		25.092	25.092
F:\OpenArray\Cycling Data\OA-20 (Mesenchymal Stem Cells) Cycling Data Summary.csv	A1c7	hsa-miR-455	Target	MSC12		27.172	27.172
F:\OpenArray\Cycling Data\OA-20 (Mesenchymal Stem Cells) Cycling Data Summary.csv	A5c7	hsa-miR-455	Target	MSC13		27.917	27.917
F:\OpenArray\Cycling Data\OA-20 (Mesenchymal Stem Cells) Cycling Data Summary.csv	B5b6	hsa-miR-192	Target	MSC13		26.909	26.909
F:\OpenArray\Cycling Data\OA-20 (Mesenchymal Stem Cells) Cycling Data Summary.csv	B1b6	hsa-miR-192	Target	MSC12		30.876	30
F:\OpenArray\Cycling Data\OA-20 (Mesenchymal Stem Cells) Cycling Data Summary.csv	A9c7	hsa-miR-455	Target	MSC20		26.114	26.114
F:\OpenArray\Cycling Data\OA-20 (Mesenchymal Stem Cells) Cycling Data Summary.csv	B9b6	hsa-miR-192	Target	MSC11		24.382	24.382
F:\OpenArray\Cycling Data\OA-20 (Mesenchymal Stem Cells) Cycling Data Summary.csv	A1c7	hsa-miR-455	Target	MSC21		21.684	21.684
F:\OpenArray\Cycling Data\OA-20 (Mesenchymal Stem Cells) Cycling Data Summary.csv	B5b6	hsa-miR-192	Target	MSC10		23.774	23.774
F:\OpenArray\Cycling Data\OA-20 (Mesenchymal Stem Cells) Cycling Data Summary.csv	A5c7	hsa-miR-455	Target	MSC22		21.168	21.168
F:\OpenArray\Cycling Data\OA-20 (Mesenchymal Stem Cells) Cycling Data Summary.csv	B9b6	hsa-miR-192	Target	MSC17		26.527	26.527
F:\OpenArray\Cycling Data\OA-20 (Mesenchymal Stem Cells) Cycling Data Summary.csv	B5b6	hsa-miR-192	Target	MSC16		24.868	24.868
F:\OpenArray\Cycling Data\OA-20 (Mesenchymal Stem Cells) Cycling Data Summary.csv	B1b6	hsa-miR-192	Target	MSC15		23.855	23.855
F:\OpenArray\Cycling Data\OA-20 (Mesenchymal Stem Cells) Cycling Data Summary.csv	B9b6	hsa-miR-192	Target	MSC14		24.847	24.847
F:\OpenArray\Cycling Data\OA-20 (Mesenchymal Stem Cells) Cycling Data Summary.csv	A1c7	hsa-miR-455	Target	MSC27		22.061	22.061
F:\OpenArray\Cycling Data\OA-20 (Mesenchymal Stem Cells) Cycling Data Summary.csv	A5c7	hsa-miR-455	Target	MSC28		21.878	21.878
F:\OpenArray\Cycling Data\OA-20 (Mesenchymal Stem Cells) Cycling Data Summary.csv	A9c7	hsa-miR-455	Target	MSC29		21.281	21.281
F:\OpenArray\Cycling Data\OA-20 (Mesenchymal Stem Cells) Cycling Data Summary.csv	B5b6	hsa-miR-192	Target	MSC19		24.206	24.206
F:\OpenArray\Cycling Data\OA-20 (Mesenchymal Stem Cells) Cycling Data Summary.csv	B1b6	hsa-miR-192	Target	MSC18		26.757	26.757
F:\OpenArray\Cycling Data\OA-20 (Mesenchymal Stem Cells) Cycling Data Summary.csv	A5c1	hsa-miR-381	Target	MSC10		26.155	26.155
F:\OpenArray\Cycling Data\OA-20 (Mesenchymal Stem Cells) Cycling Data Summary.csv	A9c7	hsa-miR-455	Target	MSC23		25.464	25.464
F:\OpenArray\Cycling Data\OA-20 (Mesenchymal Stem Cells) Cycling Data Summary.csv	A1c7	hsa-miR-455	Target	MSC24		22.636	22.636
F:\OpenArray\Cycling Data\OA-20 (Mesenchymal Stem Cells) Cycling Data Summary.csv	A5c7	hsa-miR-455	Target	MSC25		23.734	23.734
F:\OpenArray\Cycling Data\OA-20 (Mesenchymal Stem Cells) Cycling Data Summary.csv	D2f3	hsa-miR-532	Target	MSC3		18.763	18.763
F:\OpenArray\Cycling Data\OA-20 (Mesenchymal Stem Cells) Cycling Data Summary.csv	D6f3	hsa-miR-532	Target	MSC4		19.35	19.35
F:\OpenArray\Cycling Data\OA-20 (Mesenchymal Stem Cells) Cycling Data Summary.csv	D10f3	hsa-miR-532	Target	MSC5		26.213	26.213
F:\OpenArray\Cycling Data\OA-20 (Mesenchymal Stem Cells) Cycling Data Summary.csv	D2f3	hsa-miR-532	Target	MSC6		19.214	19.214
F:\OpenArray\Cycling Data\OA-20 (Mesenchymal Stem Cells) Cycling Data Summary.csv	B9b6	hsa-miR-192	Target	MSC20		25.463	25.463
F:\OpenArray\Cycling Data\OA-20 (Mesenchymal Stem Cells) Cycling Data Summary.csv	D10f3	hsa-miR-532	Target	MSC2		20.191	20.191
F:\OpenArray\Cycling Data\OA-20 (Mesenchymal Stem Cells) Cycling Data Summary.csv	C11e1	HSA-MIR-1254	Target	MSC11		30.339	30
F:\OpenArray\Cycling Data\OA-20 (Mesenchymal Stem Cells) Cycling Data Summary.csv	C7e1	HSA-MIR-1254	Target	MSC10		24.571	24.571
F:\OpenArray\Cycling Data\OA-20 (Mesenchymal Stem Cells) Cycling Data Summary.csv	C6e4	hsa-miR-654-3p	Target	MSC4		26.493	26.493
F:\OpenArray\Cycling Data\OA-20 (Mesenchymal Stem Cells) Cycling Data Summary.csv	C2e4	hsa-miR-654-3p	Target	MSC3		26.675	26.675
F:\OpenArray\Cycling Data\OA-20 (Mesenchymal Stem Cells) Cycling Data Summary.csv	C10e4	hsa-miR-654-3p	Target	MSC2		30.6	30
F:\OpenArray\Cycling Data\OA-20 (Mesenchymal Stem Cells) Cycling Data Summary.csv	C2e4	hsa-miR-654-3p	Target	MSC9		25.304	25.304
F:\OpenArray\Cycling Data\OA-20 (Mesenchymal Stem Cells) Cycling Data Summary.csv	D8a5	HSA-MIR-1269	Target	MSC19		29.402	29.402
F:\OpenArray\Cycling Data\OA-20 (Mesenchymal Stem Cells) Cycling Data Summary.csv	C10e4	hsa-miR-654-3p	Target	MSC8		27.144	27.144
F:\OpenArray\Cycling Data\OA-20 (Mesenchymal Stem Cells) Cycling Data Summary.csv	C6e4	hsa-miR-654-3p	Target	MSC7		25.702	25.702
F:\OpenArray\Cycling Data\OA-20 (Mesenchymal Stem Cells) Cycling Data Summary.csv	D12a5	HSA-MIR-1269	Target	MSC17		27.868	27.868
F:\OpenArray\Cycling Data\OA-20 (Mesenchymal Stem Cells) Cycling Data Summary.csv	C2e4	hsa-miR-654-3p	Target	MSC6		25.457	25.457
F:\OpenArray\Cycling Data\OA-20 (Mesenchymal Stem Cells) Cycling Data Summary.csv	B9b6	hsa-miR-192	Target	MSC29		21.088	21.088
F:\OpenArray\Cycling Data\OA-20 (Mesenchymal Stem Cells) Cycling Data Summary.csv	C11e1	HSA-MIR-1254	Target	MSC14		25.392	25.392
F:\OpenArray\Cycling Data\OA-20 (Mesenchymal Stem Cells) Cycling Data Summary.csv	B1b6	hsa-miR-192	Target	MSC27		25.169	25.169
F:\OpenArray\Cycling Data\OA-20 (Mesenchymal Stem Cells) Cycling Data Summary.csv	C3e1	HSA-MIR-1254	Target	MSC15		31.159	30
F:\OpenArray\Cycling Data\OA-20 (Mesenchymal Stem Cells) Cycling Data Summary.csv	B5b6	hsa-miR-192	Target	MSC28		22.494	22.494
F:\OpenArray\Cycling Data\OA-20 (Mesenchymal Stem Cells) Cycling Data Summary.csv	C3e1	HSA-MIR-1254	Target	MSC12		25.871	25.871
F:\OpenArray\Cycling Data\OA-20 (Mesenchymal Stem Cells) Cycling Data Summary.csv	B5b6	hsa-miR-192	Target	MSC25		23.392	23.392
F:\OpenArray\Cycling Data\OA-20 (Mesenchymal Stem Cells) Cycling Data Summary.csv	C7e1	HSA-MIR-1254	Target	MSC13		24.633	24.633
F:\OpenArray\Cycling Data\OA-20 (Mesenchymal Stem Cells) Cycling Data Summary.csv	B9b6	hsa-miR-192	Target	MSC26		26.288	26.288
F:\OpenArray\Cycling Data\OA-20 (Mesenchymal Stem Cells) Cycling Data Summary.csv	C3e1	HSA-MIR-1254	Target	MSC18		26.547	26.547
F:\OpenArray\Cycling Data\OA-20 (Mesenchymal Stem Cells) Cycling Data Summary.csv	B9b6	hsa-miR-192	Target	MSC23		24.739	24.739
F:\OpenArray\Cycling Data\OA-20 (Mesenchymal Stem Cells) Cycling Data Summary.csv	B1b6	hsa-miR-192	Target	MSC24		22.789	22.789
F:\OpenArray\Cycling Data\OA-20 (Mesenchymal Stem Cells) Cycling Data Summary.csv	C7e1	HSA-MIR-1254	Target	MSC16		24.664	24.664
F:\OpenArray\Cycling Data\OA-20 (Mesenchymal Stem Cells) Cycling Data Summary.csv	B1b6	hsa-miR-192	Target	MSC21		22.73	22.73
F:\OpenArray\Cycling Data\OA-20 (Mesenchymal Stem Cells) Cycling Data Summary.csv	C11e1	HSA-MIR-1254	Target	MSC17		32.345	30
F:\OpenArray\Cycling Data\OA-20 (Mesenchymal Stem Cells) Cycling Data Summary.csv	B5b6	hsa-miR-192	Target	MSC22		22.755	22.755
F:\OpenArray\Cycling Data\OA-20 (Mesenchymal Stem Cells) Cycling Data Summary.csv	D8a5	HSA-MIR-1269	Target	MSC28		27.813	27.813
F:\OpenArray\Cycling Data\OA-20 (Mesenchymal Stem Cells) Cycling Data Summary.csv	D8a5	HSA-MIR-1269	Target	MSC25		27.707	27.707
F:\OpenArray\Cycling Data\OA-20 (Mesenchymal Stem Cells) Cycling Data Summary.csv	B10a3	hsa-miR-328	Target	MSC5		22.411	22.411
F:\OpenArray\Cycling Data\OA-20 (Mesenchymal Stem Cells) Cycling Data Summary.csv	B6a3	hsa-miR-328	Target	MSC4		18.716	18.716
F:\OpenArray\Cycling Data\OA-20 (Mesenchymal Stem Cells) Cycling Data Summary.csv	B2a3	hsa-miR-328	Target	MSC3		17.499	17.499
F:\OpenArray\Cycling Data\OA-20 (Mesenchymal Stem Cells) Cycling Data Summary.csv	B10a3	hsa-miR-328	Target	MSC2		19.277	19.277
F:\OpenArray\Cycling Data\OA-20 (Mesenchymal Stem Cells) Cycling Data Summary.csv	B2a3	hsa-miR-328	Target	MSC9		18.453	18.453
F:\OpenArray\Cycling Data\OA-20 (Mesenchymal Stem Cells) Cycling Data Summary.csv	B10a3	hsa-miR-328	Target	MSC8		20.49	20.49
F:\OpenArray\Cycling Data\OA-20 (Mesenchymal Stem Cells) Cycling Data Summary.csv	B6a3	hsa-miR-328	Target	MSC7		18.871	18.871
F:\OpenArray\Cycling Data\OA-20 (Mesenchymal Stem Cells) Cycling Data Summary.csv	A10d8	hsa-miR-891a	Target	MSC26		29.597	29.597
F:\OpenArray\Cycling Data\OA-20 (Mesenchymal Stem Cells) Cycling Data Summary.csv	B2a3	hsa-miR-328	Target	MSC6		18.869	18.869
F:\OpenArray\Cycling Data\OA-20 (Mesenchymal Stem Cells) Cycling Data Summary.csv	A10d8	hsa-miR-891a	Target	MSC23		26.565	26.565
F:\OpenArray\Cycling Data\OA-20 (Mesenchymal Stem Cells) Cycling Data Summary.csv	A10d8	hsa-miR-891a	Target	MSC20		30.337	30
F:\OpenArray\Cycling Data\OA-20 (Mesenchymal Stem Cells) Cycling Data Summary.csv	A3c4	HSA-MIR-1201	Target	MSC12		29.37	29.37
F:\OpenArray\Cycling Data\OA-20 (Mesenchymal Stem Cells) Cycling Data Summary.csv	A7c4	HSA-MIR-1201	Target	MSC13		26.567	26.567
F:\OpenArray\Cycling Data\OA-20 (Mesenchymal Stem Cells) Cycling Data Summary.csv	A7c4	HSA-MIR-1201	Target	MSC10		24.401	24.401
F:\OpenArray\Cycling Data\OA-20 (Mesenchymal Stem Cells) Cycling Data Summary.csv	A11c4	HSA-MIR-1201	Target	MSC11		24.138	24.138
F:\OpenArray\Cycling Data\OA-20 (Mesenchymal Stem Cells) Cycling Data Summary.csv	A11c4	HSA-MIR-1201	Target	MSC17		26.67	26.67
F:\OpenArray\Cycling Data\OA-20 (Mesenchymal Stem Cells) Cycling Data Summary.csv	A7c4	HSA-MIR-1201	Target	MSC16		25.004	25.004
F:\OpenArray\Cycling Data\OA-20 (Mesenchymal Stem Cells) Cycling Data Summary.csv	A12a8	hsa-miR-10a#	Target	MSC29		29.648	29.648
F:\OpenArray\Cycling Data\OA-20 (Mesenchymal Stem Cells) Cycling Data Summary.csv	A3c4	HSA-MIR-1201	Target	MSC15		24.369	24.369
F:\OpenArray\Cycling Data\OA-20 (Mesenchymal Stem Cells) Cycling Data Summary.csv	A11c4	HSA-MIR-1201	Target	MSC14		24.587	24.587
F:\OpenArray\Cycling Data\OA-20 (Mesenchymal Stem Cells) Cycling Data Summary.csv	A3c4	HSA-MIR-1201	Target	MSC18		27.146	27.146
F:\OpenArray\Cycling Data\OA-20 (Mesenchymal Stem Cells) Cycling Data Summary.csv	A6d8	hsa-miR-891a	Target	MSC13		26.49	26.49
F:\OpenArray\Cycling Data\OA-20 (Mesenchymal Stem Cells) Cycling Data Summary.csv	A6d8	hsa-miR-891a	Target	MSC10		28.96	28.96
F:\OpenArray\Cycling Data\OA-20 (Mesenchymal Stem Cells) Cycling Data Summary.csv	A10d8	hsa-miR-891a	Target	MSC11		29.415	29.415
F:\OpenArray\Cycling Data\OA-20 (Mesenchymal Stem Cells) Cycling Data Summary.csv	A11c4	HSA-MIR-1201	Target	MSC20		23.157	23.157
F:\OpenArray\Cycling Data\OA-20 (Mesenchymal Stem Cells) Cycling Data Summary.csv	A3c4	HSA-MIR-1201	Target	MSC21		23.301	23.301
F:\OpenArray\Cycling Data\OA-20 (Mesenchymal Stem Cells) Cycling Data Summary.csv	A7c4	HSA-MIR-1201	Target	MSC22		21.175	21.175
F:\OpenArray\Cycling Data\OA-20 (Mesenchymal Stem Cells) Cycling Data Summary.csv	A11c4	HSA-MIR-1201	Target	MSC23		23.263	23.263
F:\OpenArray\Cycling Data\OA-20 (Mesenchymal Stem Cells) Cycling Data Summary.csv	A3c4	HSA-MIR-1201	Target	MSC24		22.863	22.863
F:\OpenArray\Cycling Data\OA-20 (Mesenchymal Stem Cells) Cycling Data Summary.csv	A11c4	HSA-MIR-1201	Target	MSC26		24.998	24.998
F:\OpenArray\Cycling Data\OA-20 (Mesenchymal Stem Cells) Cycling Data Summary.csv	A7c4	HSA-MIR-1201	Target	MSC25		22.609	22.609
F:\OpenArray\Cycling Data\OA-20 (Mesenchymal Stem Cells) Cycling Data Summary.csv	A7c4	HSA-MIR-1201	Target	MSC28		21.586	21.586
F:\OpenArray\Cycling Data\OA-20 (Mesenchymal Stem Cells) Cycling Data Summary.csv	A3c4	HSA-MIR-1201	Target	MSC27		23.329	23.329
F:\OpenArray\Cycling Data\OA-20 (Mesenchymal Stem Cells) Cycling Data Summary.csv	A11c4	HSA-MIR-1201	Target	MSC29		20.985	20.985
F:\OpenArray\Cycling Data\OA-20 (Mesenchymal Stem Cells) Cycling Data Summary.csv	C4a7	hsa-let-7g#	Target	MSC6		29.927	29.927
F:\OpenArray\Cycling Data\OA-20 (Mesenchymal Stem Cells) Cycling Data Summary.csv	C5d8	hsa-miR-143	Target	MSC13		18.497	18.497
F:\OpenArray\Cycling Data\OA-20 (Mesenchymal Stem Cells) Cycling Data Summary.csv	C1d8	hsa-miR-143	Target	MSC12		20.616	20.616
F:\OpenArray\Cycling Data\OA-20 (Mesenchymal Stem Cells) Cycling Data Summary.csv	C1d8	hsa-miR-143	Target	MSC15		19.086	19.086
F:\OpenArray\Cycling Data\OA-20 (Mesenchymal Stem Cells) Cycling Data Summary.csv	C9d8	hsa-miR-143	Target	MSC14		19.444	19.444
F:\OpenArray\Cycling Data\OA-20 (Mesenchymal Stem Cells) Cycling Data Summary.csv	C9d8	hsa-miR-143	Target	MSC11		18.834	18.834
F:\OpenArray\Cycling Data\OA-20 (Mesenchymal Stem Cells) Cycling Data Summary.csv	C5d8	hsa-miR-143	Target	MSC10		17.351	17.351
F:\OpenArray\Cycling Data\OA-20 (Mesenchymal Stem Cells) Cycling Data Summary.csv	B2d6	hsa-miR-455-3p	Target	MSC9		22.217	22.217
F:\OpenArray\Cycling Data\OA-20 (Mesenchymal Stem Cells) Cycling Data Summary.csv	D6d5	hsa-miR-155	Target	MSC28		17.944	17.944
F:\OpenArray\Cycling Data\OA-20 (Mesenchymal Stem Cells) Cycling Data Summary.csv	D10d5	hsa-miR-155	Target	MSC29		16.345	16.345
F:\OpenArray\Cycling Data\OA-20 (Mesenchymal Stem Cells) Cycling Data Summary.csv	D10d5	hsa-miR-155	Target	MSC23		20.699	20.699
F:\OpenArray\Cycling Data\OA-20 (Mesenchymal Stem Cells) Cycling Data Summary.csv	D6d5	hsa-miR-155	Target	MSC22		18.97	18.97
F:\OpenArray\Cycling Data\OA-20 (Mesenchymal Stem Cells) Cycling Data Summary.csv	D2d5	hsa-miR-155	Target	MSC21		18.682	18.682
F:\OpenArray\Cycling Data\OA-20 (Mesenchymal Stem Cells) Cycling Data Summary.csv	D10d5	hsa-miR-155	Target	MSC20		20.451	20.451
F:\OpenArray\Cycling Data\OA-20 (Mesenchymal Stem Cells) Cycling Data Summary.csv	D2d5	hsa-miR-155	Target	MSC27		17.977	17.977
F:\OpenArray\Cycling Data\OA-20 (Mesenchymal Stem Cells) Cycling Data Summary.csv	D10d5	hsa-miR-155	Target	MSC26		21.761	21.761
F:\OpenArray\Cycling Data\OA-20 (Mesenchymal Stem Cells) Cycling Data Summary.csv	D6d5	hsa-miR-155	Target	MSC25		20.318	20.318
F:\OpenArray\Cycling Data\OA-20 (Mesenchymal Stem Cells) Cycling Data Summary.csv	D2d5	hsa-miR-155	Target	MSC24		18.743	18.743
F:\OpenArray\Cycling Data\OA-20 (Mesenchymal Stem Cells) Cycling Data Summary.csv	B6d6	hsa-miR-455-3p	Target	MSC4		22.677	22.677
F:\OpenArray\Cycling Data\OA-20 (Mesenchymal Stem Cells) Cycling Data Summary.csv	B2d6	hsa-miR-455-3p	Target	MSC3		22.476	22.476
F:\OpenArray\Cycling Data\OA-20 (Mesenchymal Stem Cells) Cycling Data Summary.csv	B10d6	hsa-miR-455-3p	Target	MSC2		23.071	23.071
F:\OpenArray\Cycling Data\OA-20 (Mesenchymal Stem Cells) Cycling Data Summary.csv	B10d6	hsa-miR-455-3p	Target	MSC8		23.38	23.38
F:\OpenArray\Cycling Data\OA-20 (Mesenchymal Stem Cells) Cycling Data Summary.csv	B6d6	hsa-miR-455-3p	Target	MSC7		20.531	20.531
F:\OpenArray\Cycling Data\OA-20 (Mesenchymal Stem Cells) Cycling Data Summary.csv	B2d6	hsa-miR-455-3p	Target	MSC6		21.215	21.215
F:\OpenArray\Cycling Data\OA-20 (Mesenchymal Stem Cells) Cycling Data Summary.csv	B10d6	hsa-miR-455-3p	Target	MSC5		27.608	27.608
F:\OpenArray\Cycling Data\OA-20 (Mesenchymal Stem Cells) Cycling Data Summary.csv	D6d5	hsa-miR-155	Target	MSC19		19.554	19.554
F:\OpenArray\Cycling Data\OA-20 (Mesenchymal Stem Cells) Cycling Data Summary.csv	D10d5	hsa-miR-155	Target	MSC17		15.757	15.757
F:\OpenArray\Cycling Data\OA-20 (Mesenchymal Stem Cells) Cycling Data Summary.csv	D2d5	hsa-miR-155	Target	MSC18		19.394	19.394
F:\OpenArray\Cycling Data\OA-20 (Mesenchymal Stem Cells) Cycling Data Summary.csv	D10d5	hsa-miR-155	Target	MSC14		17.851	17.851
F:\OpenArray\Cycling Data\OA-20 (Mesenchymal Stem Cells) Cycling Data Summary.csv	D6d5	hsa-miR-155	Target	MSC13		16.343	16.343
F:\OpenArray\Cycling Data\OA-20 (Mesenchymal Stem Cells) Cycling Data Summary.csv	D6d5	hsa-miR-155	Target	MSC16		15.312	15.312
F:\OpenArray\Cycling Data\OA-20 (Mesenchymal Stem Cells) Cycling Data Summary.csv	D2d5	hsa-miR-155	Target	MSC15		16.606	16.606
F:\OpenArray\Cycling Data\OA-20 (Mesenchymal Stem Cells) Cycling Data Summary.csv	D6d5	hsa-miR-155	Target	MSC10		19.259	19.259
F:\OpenArray\Cycling Data\OA-20 (Mesenchymal Stem Cells) Cycling Data Summary.csv	D2d5	hsa-miR-155	Target	MSC12		18.303	18.303
F:\OpenArray\Cycling Data\OA-20 (Mesenchymal Stem Cells) Cycling Data Summary.csv	D10d5	hsa-miR-155	Target	MSC11		18.467	18.467
F:\OpenArray\Cycling Data\OA-20 (Mesenchymal Stem Cells) Cycling Data Summary.csv	C1d8	hsa-miR-143	Target	MSC27		17.321	17.321
F:\OpenArray\Cycling Data\OA-20 (Mesenchymal Stem Cells) Cycling Data Summary.csv	C5d8	hsa-miR-143	Target	MSC28		16.586	16.586
F:\OpenArray\Cycling Data\OA-20 (Mesenchymal Stem Cells) Cycling Data Summary.csv	C9d8	hsa-miR-143	Target	MSC29		15.59	15.59
F:\OpenArray\Cycling Data\OA-20 (Mesenchymal Stem Cells) Cycling Data Summary.csv	B1c4	hsa-miR-509-5p	Target	MSC3		24.471	24.471
F:\OpenArray\Cycling Data\OA-20 (Mesenchymal Stem Cells) Cycling Data Summary.csv	B5c4	hsa-miR-509-5p	Target	MSC4		26.325	26.325
F:\OpenArray\Cycling Data\OA-20 (Mesenchymal Stem Cells) Cycling Data Summary.csv	B9c4	hsa-miR-509-5p	Target	MSC2		30.232	30
F:\OpenArray\Cycling Data\OA-20 (Mesenchymal Stem Cells) Cycling Data Summary.csv	C5d8	hsa-miR-143	Target	MSC22		15.249	15.249
F:\OpenArray\Cycling Data\OA-20 (Mesenchymal Stem Cells) Cycling Data Summary.csv	C1d8	hsa-miR-143	Target	MSC21		16.422	16.422
F:\OpenArray\Cycling Data\OA-20 (Mesenchymal Stem Cells) Cycling Data Summary.csv	C9d8	hsa-miR-143	Target	MSC20		18.262	18.262
F:\OpenArray\Cycling Data\OA-20 (Mesenchymal Stem Cells) Cycling Data Summary.csv	C9d8	hsa-miR-143	Target	MSC26		23.046	23.046
F:\OpenArray\Cycling Data\OA-20 (Mesenchymal Stem Cells) Cycling Data Summary.csv	C5d8	hsa-miR-143	Target	MSC25		17.051	17.051
F:\OpenArray\Cycling Data\OA-20 (Mesenchymal Stem Cells) Cycling Data Summary.csv	C1d8	hsa-miR-143	Target	MSC24		17.305	17.305
F:\OpenArray\Cycling Data\OA-20 (Mesenchymal Stem Cells) Cycling Data Summary.csv	C9d8	hsa-miR-143	Target	MSC23		24.891	24.891
F:\OpenArray\Cycling Data\OA-20 (Mesenchymal Stem Cells) Cycling Data Summary.csv	C1d8	hsa-miR-143	Target	MSC18		22.511	22.511
F:\OpenArray\Cycling Data\OA-20 (Mesenchymal Stem Cells) Cycling Data Summary.csv	C5d8	hsa-miR-143	Target	MSC19		17.728	17.728
F:\OpenArray\Cycling Data\OA-20 (Mesenchymal Stem Cells) Cycling Data Summary.csv	C5d8	hsa-miR-143	Target	MSC16		19.11	19.11
F:\OpenArray\Cycling Data\OA-20 (Mesenchymal Stem Cells) Cycling Data Summary.csv	C9d8	hsa-miR-143	Target	MSC17		16.826	16.826
F:\OpenArray\Cycling Data\OA-20 (Mesenchymal Stem Cells) Cycling Data Summary.csv	B9c4	hsa-miR-509-5p	Target	MSC5		27.966	27.966
F:\OpenArray\Cycling Data\OA-20 (Mesenchymal Stem Cells) Cycling Data Summary.csv	C12a7	hsa-let-7g#	Target	MSC2		29.961	29.961
F:\OpenArray\Cycling Data\OA-20 (Mesenchymal Stem Cells) Cycling Data Summary.csv	A5a7	hsa-miR-484	Target	MSC25		15.44	15.44
F:\OpenArray\Cycling Data\OA-20 (Mesenchymal Stem Cells) Cycling Data Summary.csv	A9a7	hsa-miR-484	Target	MSC26		16.888	16.888
F:\OpenArray\Cycling Data\OA-20 (Mesenchymal Stem Cells) Cycling Data Summary.csv	A10b1	hsa-miR-299-5p	Target	MSC20		23.928	23.928
F:\OpenArray\Cycling Data\OA-20 (Mesenchymal Stem Cells) Cycling Data Summary.csv	A9a7	hsa-miR-484	Target	MSC23		17.498	17.498
F:\OpenArray\Cycling Data\OA-20 (Mesenchymal Stem Cells) Cycling Data Summary.csv	A1a7	hsa-miR-484	Target	MSC24		14.605	14.605
F:\OpenArray\Cycling Data\OA-20 (Mesenchymal Stem Cells) Cycling Data Summary.csv	A1a7	hsa-miR-484	Target	MSC21		14.679	14.679
F:\OpenArray\Cycling Data\OA-20 (Mesenchymal Stem Cells) Cycling Data Summary.csv	A5a7	hsa-miR-484	Target	MSC22		15.768	15.768
F:\OpenArray\Cycling Data\OA-20 (Mesenchymal Stem Cells) Cycling Data Summary.csv	A10b1	hsa-miR-299-5p	Target	MSC26		28.381	28.381
F:\OpenArray\Cycling Data\OA-20 (Mesenchymal Stem Cells) Cycling Data Summary.csv	A6b1	hsa-miR-299-5p	Target	MSC25		23.696	23.696
F:\OpenArray\Cycling Data\OA-20 (Mesenchymal Stem Cells) Cycling Data Summary.csv	A6b1	hsa-miR-299-5p	Target	MSC28		24.704	24.704
F:\OpenArray\Cycling Data\OA-20 (Mesenchymal Stem Cells) Cycling Data Summary.csv	A2b1	hsa-miR-299-5p	Target	MSC27		23.847	23.847
F:\OpenArray\Cycling Data\OA-20 (Mesenchymal Stem Cells) Cycling Data Summary.csv	A6b1	hsa-miR-299-5p	Target	MSC22		25.118	25.118
F:\OpenArray\Cycling Data\OA-20 (Mesenchymal Stem Cells) Cycling Data Summary.csv	A2b1	hsa-miR-299-5p	Target	MSC21		22.619	22.619
F:\OpenArray\Cycling Data\OA-20 (Mesenchymal Stem Cells) Cycling Data Summary.csv	A2b1	hsa-miR-299-5p	Target	MSC24		23.15	23.15
F:\OpenArray\Cycling Data\OA-20 (Mesenchymal Stem Cells) Cycling Data Summary.csv	A10b1	hsa-miR-299-5p	Target	MSC23		25.913	25.913
F:\OpenArray\Cycling Data\OA-20 (Mesenchymal Stem Cells) Cycling Data Summary.csv	A10c5	hsa-let-7g	Target	MSC26		20.323	20.323
F:\OpenArray\Cycling Data\OA-20 (Mesenchymal Stem Cells) Cycling Data Summary.csv	A2c5	hsa-let-7g	Target	MSC27		18.134	18.134
F:\OpenArray\Cycling Data\OA-20 (Mesenchymal Stem Cells) Cycling Data Summary.csv	A6c5	hsa-let-7g	Target	MSC28		17.434	17.434
F:\OpenArray\Cycling Data\OA-20 (Mesenchymal Stem Cells) Cycling Data Summary.csv	A10c5	hsa-let-7g	Target	MSC29		15.913	15.913
F:\OpenArray\Cycling Data\OA-20 (Mesenchymal Stem Cells) Cycling Data Summary.csv	A2b1	hsa-miR-299-5p	Target	MSC18		25.232	25.232
F:\OpenArray\Cycling Data\OA-20 (Mesenchymal Stem Cells) Cycling Data Summary.csv	A6b1	hsa-miR-299-5p	Target	MSC19		23.809	23.809
F:\OpenArray\Cycling Data\OA-20 (Mesenchymal Stem Cells) Cycling Data Summary.csv	A10c5	hsa-let-7g	Target	MSC20		17.527	17.527
F:\OpenArray\Cycling Data\OA-20 (Mesenchymal Stem Cells) Cycling Data Summary.csv	A2c5	hsa-let-7g	Target	MSC21		16.585	16.585
F:\OpenArray\Cycling Data\OA-20 (Mesenchymal Stem Cells) Cycling Data Summary.csv	A5a7	hsa-miR-484	Target	MSC19		20.7	20.7
F:\OpenArray\Cycling Data\OA-20 (Mesenchymal Stem Cells) Cycling Data Summary.csv	A6c5	hsa-let-7g	Target	MSC22		16.602	16.602
F:\OpenArray\Cycling Data\OA-20 (Mesenchymal Stem Cells) Cycling Data Summary.csv	A1a7	hsa-miR-484	Target	MSC18		21.225	21.225
F:\OpenArray\Cycling Data\OA-20 (Mesenchymal Stem Cells) Cycling Data Summary.csv	A10c5	hsa-let-7g	Target	MSC23		19.651	19.651
F:\OpenArray\Cycling Data\OA-20 (Mesenchymal Stem Cells) Cycling Data Summary.csv	A2c5	hsa-let-7g	Target	MSC24		17.498	17.498
F:\OpenArray\Cycling Data\OA-20 (Mesenchymal Stem Cells) Cycling Data Summary.csv	A5a7	hsa-miR-484	Target	MSC16		22.557	22.557
F:\OpenArray\Cycling Data\OA-20 (Mesenchymal Stem Cells) Cycling Data Summary.csv	A6c5	hsa-let-7g	Target	MSC25		18.107	18.107
F:\OpenArray\Cycling Data\OA-20 (Mesenchymal Stem Cells) Cycling Data Summary.csv	A10b1	hsa-miR-299-5p	Target	MSC17		24.674	24.674
F:\OpenArray\Cycling Data\OA-20 (Mesenchymal Stem Cells) Cycling Data Summary.csv	A6b1	hsa-miR-299-5p	Target	MSC16		24.195	24.195
F:\OpenArray\Cycling Data\OA-20 (Mesenchymal Stem Cells) Cycling Data Summary.csv	A2b1	hsa-miR-299-5p	Target	MSC15		23.568	23.568
F:\OpenArray\Cycling Data\OA-20 (Mesenchymal Stem Cells) Cycling Data Summary.csv	A10b1	hsa-miR-299-5p	Target	MSC14		25.194	25.194
F:\OpenArray\Cycling Data\OA-20 (Mesenchymal Stem Cells) Cycling Data Summary.csv	A6b1	hsa-miR-299-5p	Target	MSC13		26.709	26.709
F:\OpenArray\Cycling Data\OA-20 (Mesenchymal Stem Cells) Cycling Data Summary.csv	A10b1	hsa-miR-299-5p	Target	MSC11		25.568	25.568
F:\OpenArray\Cycling Data\OA-20 (Mesenchymal Stem Cells) Cycling Data Summary.csv	A6b1	hsa-miR-299-5p	Target	MSC10		25.288	25.288
F:\OpenArray\Cycling Data\OA-20 (Mesenchymal Stem Cells) Cycling Data Summary.csv	A5a7	hsa-miR-484	Target	MSC28		14.962	14.962
F:\OpenArray\Cycling Data\OA-20 (Mesenchymal Stem Cells) Cycling Data Summary.csv	A1a7	hsa-miR-484	Target	MSC27		15.309	15.309
F:\OpenArray\Cycling Data\OA-20 (Mesenchymal Stem Cells) Cycling Data Summary.csv	A9a7	hsa-miR-484	Target	MSC29		13.145	13.145
F:\OpenArray\Cycling Data\OA-20 (Mesenchymal Stem Cells) Cycling Data Summary.csv	A11d1	HSA-MIR-1260	Target	MSC8		19.949	19.949
F:\OpenArray\Cycling Data\OA-20 (Mesenchymal Stem Cells) Cycling Data Summary.csv	A3d1	HSA-MIR-1260	Target	MSC9		20.917	20.917
F:\OpenArray\Cycling Data\OA-20 (Mesenchymal Stem Cells) Cycling Data Summary.csv	A3d1	HSA-MIR-1260	Target	MSC6		17.234	17.234
F:\OpenArray\Cycling Data\OA-20 (Mesenchymal Stem Cells) Cycling Data Summary.csv	A7d1	HSA-MIR-1260	Target	MSC7		16.731	16.731
F:\OpenArray\Cycling Data\OA-20 (Mesenchymal Stem Cells) Cycling Data Summary.csv	A7d1	HSA-MIR-1260	Target	MSC4		19.735	19.735
F:\OpenArray\Cycling Data\OA-20 (Mesenchymal Stem Cells) Cycling Data Summary.csv	A11d1	HSA-MIR-1260	Target	MSC5		19.425	19.425
F:\OpenArray\Cycling Data\OA-20 (Mesenchymal Stem Cells) Cycling Data Summary.csv	A5d6	hsa-miR-140-3p	Target	MSC1		32.224	30
F:\OpenArray\Cycling Data\OA-20 (Mesenchymal Stem Cells) Cycling Data Summary.csv	A9d6	hsa-miR-140-3p	Target	MSC8		20.961	20.961
F:\OpenArray\Cycling Data\OA-20 (Mesenchymal Stem Cells) Cycling Data Summary.csv	A1d6	hsa-miR-140-3p	Target	MSC6		22.074	22.074
F:\OpenArray\Cycling Data\OA-20 (Mesenchymal Stem Cells) Cycling Data Summary.csv	A9d6	hsa-miR-140-3p	Target	MSC5		23.115	23.115
F:\OpenArray\Cycling Data\OA-20 (Mesenchymal Stem Cells) Cycling Data Summary.csv	A9d6	hsa-miR-140-3p	Target	MSC2		21.588	21.588
F:\OpenArray\Cycling Data\OA-20 (Mesenchymal Stem Cells) Cycling Data Summary.csv	A7d1	HSA-MIR-1260	Target	MSC1		28.129	28.129
F:\OpenArray\Cycling Data\OA-20 (Mesenchymal Stem Cells) Cycling Data Summary.csv	A3d1	HSA-MIR-1260	Target	MSC3		18.907	18.907
F:\OpenArray\Cycling Data\OA-20 (Mesenchymal Stem Cells) Cycling Data Summary.csv	A10b1	hsa-miR-299-5p	Target	MSC29		23.158	23.158
F:\OpenArray\Cycling Data\OA-20 (Mesenchymal Stem Cells) Cycling Data Summary.csv	A11d1	HSA-MIR-1260	Target	MSC2		17.371	17.371
F:\OpenArray\Cycling Data\OA-20 (Mesenchymal Stem Cells) Cycling Data Summary.csv	C6f8	hsa-miR-92a	Target	MSC19		17.417	17.417
F:\OpenArray\Cycling Data\OA-20 (Mesenchymal Stem Cells) Cycling Data Summary.csv	C2f8	hsa-miR-92a	Target	MSC18		18.252	18.252
F:\OpenArray\Cycling Data\OA-20 (Mesenchymal Stem Cells) Cycling Data Summary.csv	C10f8	hsa-miR-92a	Target	MSC17		17.636	17.636
F:\OpenArray\Cycling Data\OA-20 (Mesenchymal Stem Cells) Cycling Data Summary.csv	C6f8	hsa-miR-92a	Target	MSC16		17.143	17.143
F:\OpenArray\Cycling Data\OA-20 (Mesenchymal Stem Cells) Cycling Data Summary.csv	C2f8	hsa-miR-92a	Target	MSC15		17.001	17.001
F:\OpenArray\Cycling Data\OA-20 (Mesenchymal Stem Cells) Cycling Data Summary.csv	C10f8	hsa-miR-92a	Target	MSC14		17.72	17.72
F:\OpenArray\Cycling Data\OA-20 (Mesenchymal Stem Cells) Cycling Data Summary.csv	D5b8	hsa-miR-373	Target	MSC7		30.408	30
F:\OpenArray\Cycling Data\OA-20 (Mesenchymal Stem Cells) Cycling Data Summary.csv	C6f8	hsa-miR-92a	Target	MSC13		17.325	17.325
F:\OpenArray\Cycling Data\OA-20 (Mesenchymal Stem Cells) Cycling Data Summary.csv	D1b8	hsa-miR-373	Target	MSC6		28.842	28.842
F:\OpenArray\Cycling Data\OA-20 (Mesenchymal Stem Cells) Cycling Data Summary.csv	C2f8	hsa-miR-92a	Target	MSC12		17.845	17.845
F:\OpenArray\Cycling Data\OA-20 (Mesenchymal Stem Cells) Cycling Data Summary.csv	C10f8	hsa-miR-92a	Target	MSC11		18.144	18.144
F:\OpenArray\Cycling Data\OA-20 (Mesenchymal Stem Cells) Cycling Data Summary.csv	C6f8	hsa-miR-92a	Target	MSC10		18.411	18.411
F:\OpenArray\Cycling Data\OA-20 (Mesenchymal Stem Cells) Cycling Data Summary.csv	D5d1	hsa-miR-493	Target	MSC7		22.635	22.635
F:\OpenArray\Cycling Data\OA-20 (Mesenchymal Stem Cells) Cycling Data Summary.csv	D9d1	hsa-miR-493	Target	MSC8		23.251	23.251
F:\OpenArray\Cycling Data\OA-20 (Mesenchymal Stem Cells) Cycling Data Summary.csv	B1e6	hsa-miR-502	Target	MSC9		24.936	24.936
F:\OpenArray\Cycling Data\OA-20 (Mesenchymal Stem Cells) Cycling Data Summary.csv	D9d1	hsa-miR-493	Target	MSC5		27.536	27.536
F:\OpenArray\Cycling Data\OA-20 (Mesenchymal Stem Cells) Cycling Data Summary.csv	B9e6	hsa-miR-502	Target	MSC8		26.313	26.313
F:\OpenArray\Cycling Data\OA-20 (Mesenchymal Stem Cells) Cycling Data Summary.csv	B5e6	hsa-miR-502	Target	MSC7		24.442	24.442
F:\OpenArray\Cycling Data\OA-20 (Mesenchymal Stem Cells) Cycling Data Summary.csv	B1e6	hsa-miR-502	Target	MSC6		23.955	23.955
F:\OpenArray\Cycling Data\OA-20 (Mesenchymal Stem Cells) Cycling Data Summary.csv	B5e6	hsa-miR-502	Target	MSC4		25.008	25.008
F:\OpenArray\Cycling Data\OA-20 (Mesenchymal Stem Cells) Cycling Data Summary.csv	D5d1	hsa-miR-493	Target	MSC4		22.686	22.686
F:\OpenArray\Cycling Data\OA-20 (Mesenchymal Stem Cells) Cycling Data Summary.csv	D9d1	hsa-miR-493	Target	MSC2		23.116	23.116
F:\OpenArray\Cycling Data\OA-20 (Mesenchymal Stem Cells) Cycling Data Summary.csv	B3b7	hsa-miR-361-3p	Target	MSC18		27.87	27.87
F:\OpenArray\Cycling Data\OA-20 (Mesenchymal Stem Cells) Cycling Data Summary.csv	A11f5	HSA-MIR-1262	Target	MSC23		29.128	29.128
F:\OpenArray\Cycling Data\OA-20 (Mesenchymal Stem Cells) Cycling Data Summary.csv	A3f5	HSA-MIR-1262	Target	MSC21		28.645	28.645
F:\OpenArray\Cycling Data\OA-20 (Mesenchymal Stem Cells) Cycling Data Summary.csv	B11b7	hsa-miR-361-3p	Target	MSC17		24.2	24.2
F:\OpenArray\Cycling Data\OA-20 (Mesenchymal Stem Cells) Cycling Data Summary.csv	C6f8	hsa-miR-92a	Target	MSC28		16.904	16.904
F:\OpenArray\Cycling Data\OA-20 (Mesenchymal Stem Cells) Cycling Data Summary.csv	A9f6	hsa-miR-15b	Target	MSC2		19.027	19.027
F:\OpenArray\Cycling Data\OA-20 (Mesenchymal Stem Cells) Cycling Data Summary.csv	C2f8	hsa-miR-92a	Target	MSC27		16.845	16.845
F:\OpenArray\Cycling Data\OA-20 (Mesenchymal Stem Cells) Cycling Data Summary.csv	A1f6	hsa-miR-15b	Target	MSC3		17.907	17.907
F:\OpenArray\Cycling Data\OA-20 (Mesenchymal Stem Cells) Cycling Data Summary.csv	A5f6	hsa-miR-15b	Target	MSC4		18.077	18.077
F:\OpenArray\Cycling Data\OA-20 (Mesenchymal Stem Cells) Cycling Data Summary.csv	C10f8	hsa-miR-92a	Target	MSC29		16.314	16.314
F:\OpenArray\Cycling Data\OA-20 (Mesenchymal Stem Cells) Cycling Data Summary.csv	A9f6	hsa-miR-15b	Target	MSC5		23.986	23.986
F:\OpenArray\Cycling Data\OA-20 (Mesenchymal Stem Cells) Cycling Data Summary.csv	B7b7	hsa-miR-361-3p	Target	MSC10		25.451	25.451
F:\OpenArray\Cycling Data\OA-20 (Mesenchymal Stem Cells) Cycling Data Summary.csv	C2f8	hsa-miR-92a	Target	MSC24		17.422	17.422
F:\OpenArray\Cycling Data\OA-20 (Mesenchymal Stem Cells) Cycling Data Summary.csv	A1f6	hsa-miR-15b	Target	MSC6		17.997	17.997
F:\OpenArray\Cycling Data\OA-20 (Mesenchymal Stem Cells) Cycling Data Summary.csv	B11b7	hsa-miR-361-3p	Target	MSC11		26.018	26.018
F:\OpenArray\Cycling Data\OA-20 (Mesenchymal Stem Cells) Cycling Data Summary.csv	C10f8	hsa-miR-92a	Target	MSC23		17.567	17.567
F:\OpenArray\Cycling Data\OA-20 (Mesenchymal Stem Cells) Cycling Data Summary.csv	A5f6	hsa-miR-15b	Target	MSC7		18.046	18.046
F:\OpenArray\Cycling Data\OA-20 (Mesenchymal Stem Cells) Cycling Data Summary.csv	C10f8	hsa-miR-92a	Target	MSC26		18.687	18.687
F:\OpenArray\Cycling Data\OA-20 (Mesenchymal Stem Cells) Cycling Data Summary.csv	A9f6	hsa-miR-15b	Target	MSC8		20.712	20.712
F:\OpenArray\Cycling Data\OA-20 (Mesenchymal Stem Cells) Cycling Data Summary.csv	C6f8	hsa-miR-92a	Target	MSC25		17.75	17.75
F:\OpenArray\Cycling Data\OA-20 (Mesenchymal Stem Cells) Cycling Data Summary.csv	A7f5	HSA-MIR-1262	Target	MSC28		27.423	27.423
F:\OpenArray\Cycling Data\OA-20 (Mesenchymal Stem Cells) Cycling Data Summary.csv	A1f6	hsa-miR-15b	Target	MSC9		18.211	18.211
F:\OpenArray\Cycling Data\OA-20 (Mesenchymal Stem Cells) Cycling Data Summary.csv	B11b7	hsa-miR-361-3p	Target	MSC14		24.921	24.921
F:\OpenArray\Cycling Data\OA-20 (Mesenchymal Stem Cells) Cycling Data Summary.csv	C10f8	hsa-miR-92a	Target	MSC20		17.426	17.426
F:\OpenArray\Cycling Data\OA-20 (Mesenchymal Stem Cells) Cycling Data Summary.csv	C6f8	hsa-miR-92a	Target	MSC22		17.766	17.766
F:\OpenArray\Cycling Data\OA-20 (Mesenchymal Stem Cells) Cycling Data Summary.csv	B7b7	hsa-miR-361-3p	Target	MSC13		25.174	25.174
F:\OpenArray\Cycling Data\OA-20 (Mesenchymal Stem Cells) Cycling Data Summary.csv	C2f8	hsa-miR-92a	Target	MSC21		17.19	17.19
F:\OpenArray\Cycling Data\OA-20 (Mesenchymal Stem Cells) Cycling Data Summary.csv	C12e3	hsa-miR-668	Target	MSC8		23.83	23.83
F:\OpenArray\Cycling Data\OA-20 (Mesenchymal Stem Cells) Cycling Data Summary.csv	C11e1	HSA-MIR-1254	Target	MSC26		27.817	27.817
F:\OpenArray\Cycling Data\OA-20 (Mesenchymal Stem Cells) Cycling Data Summary.csv	C7e1	HSA-MIR-1254	Target	MSC25		31.773	30
F:\OpenArray\Cycling Data\OA-20 (Mesenchymal Stem Cells) Cycling Data Summary.csv	D11f8	hsa-miR-605	Target	MSC8		29.418	29.418
F:\OpenArray\Cycling Data\OA-20 (Mesenchymal Stem Cells) Cycling Data Summary.csv	C3e1	HSA-MIR-1254	Target	MSC24		31.386	30
F:\OpenArray\Cycling Data\OA-20 (Mesenchymal Stem Cells) Cycling Data Summary.csv	C11e1	HSA-MIR-1254	Target	MSC23		29.722	29.722
F:\OpenArray\Cycling Data\OA-20 (Mesenchymal Stem Cells) Cycling Data Summary.csv	C11e1	HSA-MIR-1254	Target	MSC29		31.564	30
F:\OpenArray\Cycling Data\OA-20 (Mesenchymal Stem Cells) Cycling Data Summary.csv	C7e1	HSA-MIR-1254	Target	MSC28		30.23	30
F:\OpenArray\Cycling Data\OA-20 (Mesenchymal Stem Cells) Cycling Data Summary.csv	C3e1	HSA-MIR-1254	Target	MSC27		26.083	26.083
F:\OpenArray\Cycling Data\OA-20 (Mesenchymal Stem Cells) Cycling Data Summary.csv	A11a5	hsa-miR-409-3p	Target	MSC2		16.683	16.683
F:\OpenArray\Cycling Data\OA-20 (Mesenchymal Stem Cells) Cycling Data Summary.csv	A3a5	hsa-miR-409-3p	Target	MSC3		19.273	19.273
F:\OpenArray\Cycling Data\OA-20 (Mesenchymal Stem Cells) Cycling Data Summary.csv	A7a5	hsa-miR-409-3p	Target	MSC4		17.327	17.327
F:\OpenArray\Cycling Data\OA-20 (Mesenchymal Stem Cells) Cycling Data Summary.csv	A3a5	hsa-miR-409-3p	Target	MSC6		17.095	17.095
F:\OpenArray\Cycling Data\OA-20 (Mesenchymal Stem Cells) Cycling Data Summary.csv	A7a5	hsa-miR-409-3p	Target	MSC7		15.58	15.58
F:\OpenArray\Cycling Data\OA-20 (Mesenchymal Stem Cells) Cycling Data Summary.csv	A11a5	hsa-miR-409-3p	Target	MSC8		18.006	18.006
F:\OpenArray\Cycling Data\OA-20 (Mesenchymal Stem Cells) Cycling Data Summary.csv	D5e6	hsa-miR-618	Target	MSC28		32.31	30
F:\OpenArray\Cycling Data\OA-20 (Mesenchymal Stem Cells) Cycling Data Summary.csv	A3a5	hsa-miR-409-3p	Target	MSC9		16.121	16.121
F:\OpenArray\Cycling Data\OA-20 (Mesenchymal Stem Cells) Cycling Data Summary.csv	D9e6	hsa-miR-618	Target	MSC29		25.236	25.236
F:\OpenArray\Cycling Data\OA-20 (Mesenchymal Stem Cells) Cycling Data Summary.csv	B6b2	hsa-miR-331-5p	Target	MSC25		31.082	30
F:\OpenArray\Cycling Data\OA-20 (Mesenchymal Stem Cells) Cycling Data Summary.csv	B2b2	hsa-miR-331-5p	Target	MSC24		31.395	30
F:\OpenArray\Cycling Data\OA-20 (Mesenchymal Stem Cells) Cycling Data Summary.csv	B10b2	hsa-miR-331-5p	Target	MSC23		31.558	30
F:\OpenArray\Cycling Data\OA-20 (Mesenchymal Stem Cells) Cycling Data Summary.csv	B6b2	hsa-miR-331-5p	Target	MSC22		15.436	15.436
F:\OpenArray\Cycling Data\OA-20 (Mesenchymal Stem Cells) Cycling Data Summary.csv	B10b2	hsa-miR-331-5p	Target	MSC29		27.393	27.393
F:\OpenArray\Cycling Data\OA-20 (Mesenchymal Stem Cells) Cycling Data Summary.csv	A9g3	hsa-miR-548c	Target	MSC8		27.884	27.884
F:\OpenArray\Cycling Data\OA-20 (Mesenchymal Stem Cells) Cycling Data Summary.csv	D5e6	hsa-miR-618	Target	MSC22		26.419	26.419
F:\OpenArray\Cycling Data\OA-20 (Mesenchymal Stem Cells) Cycling Data Summary.csv	A7a5	hsa-miR-409-3p	Target	MSC1		23.483	23.483
F:\OpenArray\Cycling Data\OA-20 (Mesenchymal Stem Cells) Cycling Data Summary.csv	B2b2	hsa-miR-331-5p	Target	MSC27		32.269	30
F:\OpenArray\Cycling Data\OA-20 (Mesenchymal Stem Cells) Cycling Data Summary.csv	D1a4	hsa-miR-216b	Target	MSC3		28.237	28.237
F:\OpenArray\Cycling Data\OA-20 (Mesenchymal Stem Cells) Cycling Data Summary.csv	B2b2	hsa-miR-331-5p	Target	MSC21		29.145	29.145
F:\OpenArray\Cycling Data\OA-20 (Mesenchymal Stem Cells) Cycling Data Summary.csv	C3e1	HSA-MIR-1254	Target	MSC21		23.766	23.766
F:\OpenArray\Cycling Data\OA-20 (Mesenchymal Stem Cells) Cycling Data Summary.csv	C7e1	HSA-MIR-1254	Target	MSC22		31.801	30
F:\OpenArray\Cycling Data\OA-20 (Mesenchymal Stem Cells) Cycling Data Summary.csv	C11e1	HSA-MIR-1254	Target	MSC20		31.737	30
F:\OpenArray\Cycling Data\OA-20 (Mesenchymal Stem Cells) Cycling Data Summary.csv	A9a7	hsa-miR-484	Target	MSC11		16.149	16.149
F:\OpenArray\Cycling Data\OA-20 (Mesenchymal Stem Cells) Cycling Data Summary.csv	A5a7	hsa-miR-484	Target	MSC10		16.297	16.297
F:\OpenArray\Cycling Data\OA-20 (Mesenchymal Stem Cells) Cycling Data Summary.csv	A1a7	hsa-miR-484	Target	MSC12		25.134	25.134
F:\OpenArray\Cycling Data\OA-20 (Mesenchymal Stem Cells) Cycling Data Summary.csv	A1a7	hsa-miR-484	Target	MSC15		15.799	15.799
F:\OpenArray\Cycling Data\OA-20 (Mesenchymal Stem Cells) Cycling Data Summary.csv	B9e6	hsa-miR-502	Target	MSC2		25.537	25.537
F:\OpenArray\Cycling Data\OA-20 (Mesenchymal Stem Cells) Cycling Data Summary.csv	B1e6	hsa-miR-502	Target	MSC3		23.564	23.564
F:\OpenArray\Cycling Data\OA-20 (Mesenchymal Stem Cells) Cycling Data Summary.csv	A9a7	hsa-miR-484	Target	MSC14		23.831	23.831
F:\OpenArray\Cycling Data\OA-20 (Mesenchymal Stem Cells) Cycling Data Summary.csv	B10b8	hsa-miR-542-5p	Target	MSC8		26.41	26.41
F:\OpenArray\Cycling Data\OA-20 (Mesenchymal Stem Cells) Cycling Data Summary.csv	B10b2	hsa-miR-331-5p	Target	MSC14		29.821	29.821
F:\OpenArray\Cycling Data\OA-20 (Mesenchymal Stem Cells) Cycling Data Summary.csv	B6b2	hsa-miR-331-5p	Target	MSC13		28.835	28.835
F:\OpenArray\Cycling Data\OA-20 (Mesenchymal Stem Cells) Cycling Data Summary.csv	B10b8	hsa-miR-542-5p	Target	MSC5		28.779	28.779
F:\OpenArray\Cycling Data\OA-20 (Mesenchymal Stem Cells) Cycling Data Summary.csv	B6b8	hsa-miR-542-5p	Target	MSC4		25.32	25.32
F:\OpenArray\Cycling Data\OA-20 (Mesenchymal Stem Cells) Cycling Data Summary.csv	B10b2	hsa-miR-331-5p	Target	MSC17		29.161	29.161
F:\OpenArray\Cycling Data\OA-20 (Mesenchymal Stem Cells) Cycling Data Summary.csv	A10d8	hsa-miR-891a	Target	MSC5		29.216	29.216
F:\OpenArray\Cycling Data\OA-20 (Mesenchymal Stem Cells) Cycling Data Summary.csv	D8d1	hsa-miR-616	Target	MSC25		26.412	26.412
F:\OpenArray\Cycling Data\OA-20 (Mesenchymal Stem Cells) Cycling Data Summary.csv	D4d1	hsa-miR-616	Target	MSC24		25.756	25.756
F:\OpenArray\Cycling Data\OA-20 (Mesenchymal Stem Cells) Cycling Data Summary.csv	D12d1	hsa-miR-616	Target	MSC23		26.918	26.918
F:\OpenArray\Cycling Data\OA-20 (Mesenchymal Stem Cells) Cycling Data Summary.csv	D8d1	hsa-miR-616	Target	MSC22		27.328	27.328
F:\OpenArray\Cycling Data\OA-20 (Mesenchymal Stem Cells) Cycling Data Summary.csv	D12d1	hsa-miR-616	Target	MSC29		25.536	25.536
F:\OpenArray\Cycling Data\OA-20 (Mesenchymal Stem Cells) Cycling Data Summary.csv	D8d1	hsa-miR-616	Target	MSC28		26.989	26.989
F:\OpenArray\Cycling Data\OA-20 (Mesenchymal Stem Cells) Cycling Data Summary.csv	A11d4	HSA-MIR-1227	Target	MSC29		24.376	24.376
F:\OpenArray\Cycling Data\OA-20 (Mesenchymal Stem Cells) Cycling Data Summary.csv	D4d1	hsa-miR-616	Target	MSC27		27.333	27.333
F:\OpenArray\Cycling Data\OA-20 (Mesenchymal Stem Cells) Cycling Data Summary.csv	A8b6	hsa-miR-193b#	Target	MSC10		22.555	22.555
F:\OpenArray\Cycling Data\OA-20 (Mesenchymal Stem Cells) Cycling Data Summary.csv	A7d4	HSA-MIR-1227	Target	MSC28		24.696	24.696
F:\OpenArray\Cycling Data\OA-20 (Mesenchymal Stem Cells) Cycling Data Summary.csv	A12b6	hsa-miR-193b#	Target	MSC11		22.859	22.859
F:\OpenArray\Cycling Data\OA-20 (Mesenchymal Stem Cells) Cycling Data Summary.csv	A3d4	HSA-MIR-1227	Target	MSC27		25.377	25.377
F:\OpenArray\Cycling Data\OA-20 (Mesenchymal Stem Cells) Cycling Data Summary.csv	A11d4	HSA-MIR-1227	Target	MSC26		27.213	27.213
F:\OpenArray\Cycling Data\OA-20 (Mesenchymal Stem Cells) Cycling Data Summary.csv	A7d4	HSA-MIR-1227	Target	MSC25		25.726	25.726
F:\OpenArray\Cycling Data\OA-20 (Mesenchymal Stem Cells) Cycling Data Summary.csv	D12d1	hsa-miR-616	Target	MSC20		25.886	25.886
F:\OpenArray\Cycling Data\OA-20 (Mesenchymal Stem Cells) Cycling Data Summary.csv	A3d4	HSA-MIR-1227	Target	MSC24		25.601	25.601
F:\OpenArray\Cycling Data\OA-20 (Mesenchymal Stem Cells) Cycling Data Summary.csv	D4d1	hsa-miR-616	Target	MSC21		26.244	26.244
F:\OpenArray\Cycling Data\OA-20 (Mesenchymal Stem Cells) Cycling Data Summary.csv	D1f5	hsa-miR-616	Target	MSC21		26.115	26.115
F:\OpenArray\Cycling Data\OA-20 (Mesenchymal Stem Cells) Cycling Data Summary.csv	A11d4	HSA-MIR-1227	Target	MSC23		28.178	28.178
F:\OpenArray\Cycling Data\OA-20 (Mesenchymal Stem Cells) Cycling Data Summary.csv	A7d4	HSA-MIR-1227	Target	MSC22		24.918	24.918
F:\OpenArray\Cycling Data\OA-20 (Mesenchymal Stem Cells) Cycling Data Summary.csv	A3d4	HSA-MIR-1227	Target	MSC21		24.694	24.694
F:\OpenArray\Cycling Data\OA-20 (Mesenchymal Stem Cells) Cycling Data Summary.csv	A11d4	HSA-MIR-1227	Target	MSC20		25.368	25.368
F:\OpenArray\Cycling Data\OA-20 (Mesenchymal Stem Cells) Cycling Data Summary.csv	B10a2	hsa-miR-370	Target	MSC2		19.024	19.024
F:\OpenArray\Cycling Data\OA-20 (Mesenchymal Stem Cells) Cycling Data Summary.csv	B2a2	hsa-miR-370	Target	MSC3		17.821	17.821
F:\OpenArray\Cycling Data\OA-20 (Mesenchymal Stem Cells) Cycling Data Summary.csv	B6a2	hsa-miR-370	Target	MSC4		19.009	19.009
F:\OpenArray\Cycling Data\OA-20 (Mesenchymal Stem Cells) Cycling Data Summary.csv	D3d5	hsa-miR-411#	Target	MSC9		26.386	26.386
F:\OpenArray\Cycling Data\OA-20 (Mesenchymal Stem Cells) Cycling Data Summary.csv	B10a2	hsa-miR-370	Target	MSC5		23.194	23.194
F:\OpenArray\Cycling Data\OA-20 (Mesenchymal Stem Cells) Cycling Data Summary.csv	B2a2	hsa-miR-370	Target	MSC6		19.312	19.312
F:\OpenArray\Cycling Data\OA-20 (Mesenchymal Stem Cells) Cycling Data Summary.csv	D7d5	hsa-miR-411#	Target	MSC7		25.849	25.849
F:\OpenArray\Cycling Data\OA-20 (Mesenchymal Stem Cells) Cycling Data Summary.csv	B6a2	hsa-miR-370	Target	MSC7		18.544	18.544
F:\OpenArray\Cycling Data\OA-20 (Mesenchymal Stem Cells) Cycling Data Summary.csv	A12b6	hsa-miR-193b#	Target	MSC17		22.669	22.669
F:\OpenArray\Cycling Data\OA-20 (Mesenchymal Stem Cells) Cycling Data Summary.csv	B10a2	hsa-miR-370	Target	MSC8		20.839	20.839
F:\OpenArray\Cycling Data\OA-20 (Mesenchymal Stem Cells) Cycling Data Summary.csv	D3d5	hsa-miR-411#	Target	MSC6		25.102	25.102
F:\OpenArray\Cycling Data\OA-20 (Mesenchymal Stem Cells) Cycling Data Summary.csv	A8b6	hsa-miR-193b#	Target	MSC16		21.617	21.617
F:\OpenArray\Cycling Data\OA-20 (Mesenchymal Stem Cells) Cycling Data Summary.csv	B2a2	hsa-miR-370	Target	MSC9		19.121	19.121
F:\OpenArray\Cycling Data\OA-20 (Mesenchymal Stem Cells) Cycling Data Summary.csv	D11d5	hsa-miR-411#	Target	MSC5		27.177	27.177
F:\OpenArray\Cycling Data\OA-20 (Mesenchymal Stem Cells) Cycling Data Summary.csv	A8b6	hsa-miR-193b#	Target	MSC19		21.205	21.205
F:\OpenArray\Cycling Data\OA-20 (Mesenchymal Stem Cells) Cycling Data Summary.csv	D7d5	hsa-miR-411#	Target	MSC4		25.849	25.849
F:\OpenArray\Cycling Data\OA-20 (Mesenchymal Stem Cells) Cycling Data Summary.csv	A4b6	hsa-miR-193b#	Target	MSC18		20.988	20.988
F:\OpenArray\Cycling Data\OA-20 (Mesenchymal Stem Cells) Cycling Data Summary.csv	D5e6	hsa-miR-618	Target	MSC10		27.657	27.657
F:\OpenArray\Cycling Data\OA-20 (Mesenchymal Stem Cells) Cycling Data Summary.csv	A3d4	HSA-MIR-1227	Target	MSC18		29.059	29.059
F:\OpenArray\Cycling Data\OA-20 (Mesenchymal Stem Cells) Cycling Data Summary.csv	A8b6	hsa-miR-193b#	Target	MSC13		21.769	21.769
F:\OpenArray\Cycling Data\OA-20 (Mesenchymal Stem Cells) Cycling Data Summary.csv	A4b6	hsa-miR-193b#	Target	MSC12		21.948	21.948
F:\OpenArray\Cycling Data\OA-20 (Mesenchymal Stem Cells) Cycling Data Summary.csv	D11d5	hsa-miR-411#	Target	MSC2		25.302	25.302
F:\OpenArray\Cycling Data\OA-20 (Mesenchymal Stem Cells) Cycling Data Summary.csv	A4b6	hsa-miR-193b#	Target	MSC15		21.55	21.55
F:\OpenArray\Cycling Data\OA-20 (Mesenchymal Stem Cells) Cycling Data Summary.csv	A12b6	hsa-miR-193b#	Target	MSC14		21.842	21.842
F:\OpenArray\Cycling Data\OA-20 (Mesenchymal Stem Cells) Cycling Data Summary.csv	A3d4	HSA-MIR-1227	Target	MSC15		25.628	25.628
F:\OpenArray\Cycling Data\OA-20 (Mesenchymal Stem Cells) Cycling Data Summary.csv	A11d4	HSA-MIR-1227	Target	MSC14		27.459	27.459
F:\OpenArray\Cycling Data\OA-20 (Mesenchymal Stem Cells) Cycling Data Summary.csv	A12b6	hsa-miR-193b#	Target	MSC20		21.319	21.319
F:\OpenArray\Cycling Data\OA-20 (Mesenchymal Stem Cells) Cycling Data Summary.csv	A11d4	HSA-MIR-1227	Target	MSC17		27.498	27.498
F:\OpenArray\Cycling Data\OA-20 (Mesenchymal Stem Cells) Cycling Data Summary.csv	A4b6	hsa-miR-193b#	Target	MSC21		21.125	21.125
F:\OpenArray\Cycling Data\OA-20 (Mesenchymal Stem Cells) Cycling Data Summary.csv	A7d4	HSA-MIR-1227	Target	MSC16		28.641	28.641
F:\OpenArray\Cycling Data\OA-20 (Mesenchymal Stem Cells) Cycling Data Summary.csv	A8b6	hsa-miR-193b#	Target	MSC22		21.73	21.73
F:\OpenArray\Cycling Data\OA-20 (Mesenchymal Stem Cells) Cycling Data Summary.csv	D5e6	hsa-miR-618	Target	MSC16		29.503	29.503
F:\OpenArray\Cycling Data\OA-20 (Mesenchymal Stem Cells) Cycling Data Summary.csv	A11d4	HSA-MIR-1227	Target	MSC11		26.163	26.163
F:\OpenArray\Cycling Data\OA-20 (Mesenchymal Stem Cells) Cycling Data Summary.csv	D1e6	hsa-miR-618	Target	MSC15		27.785	27.785
F:\OpenArray\Cycling Data\OA-20 (Mesenchymal Stem Cells) Cycling Data Summary.csv	A7d4	HSA-MIR-1227	Target	MSC10		26.175	26.175
F:\OpenArray\Cycling Data\OA-20 (Mesenchymal Stem Cells) Cycling Data Summary.csv	A7d4	HSA-MIR-1227	Target	MSC13		27.837	27.837
F:\OpenArray\Cycling Data\OA-20 (Mesenchymal Stem Cells) Cycling Data Summary.csv	D9e6	hsa-miR-618	Target	MSC14		28.198	28.198
F:\OpenArray\Cycling Data\OA-20 (Mesenchymal Stem Cells) Cycling Data Summary.csv	D5e6	hsa-miR-618	Target	MSC13		28.141	28.141
F:\OpenArray\Cycling Data\OA-20 (Mesenchymal Stem Cells) Cycling Data Summary.csv	A12a7	hsa-miR-27b#	Target	MSC8		24.454	24.454
F:\OpenArray\Cycling Data\OA-20 (Mesenchymal Stem Cells) Cycling Data Summary.csv	A8a7	hsa-miR-27b#	Target	MSC7		21.83	21.83
F:\OpenArray\Cycling Data\OA-20 (Mesenchymal Stem Cells) Cycling Data Summary.csv	A4a7	hsa-miR-27b#	Target	MSC6		21.668	21.668
F:\OpenArray\Cycling Data\OA-20 (Mesenchymal Stem Cells) Cycling Data Summary.csv	A12a7	hsa-miR-27b#	Target	MSC5		22.503	22.503
F:\OpenArray\Cycling Data\OA-20 (Mesenchymal Stem Cells) Cycling Data Summary.csv	A8a7	hsa-miR-27b#	Target	MSC4		21.643	21.643
F:\OpenArray\Cycling Data\OA-20 (Mesenchymal Stem Cells) Cycling Data Summary.csv	A4a7	hsa-miR-27b#	Target	MSC3		20.11	20.11
F:\OpenArray\Cycling Data\OA-20 (Mesenchymal Stem Cells) Cycling Data Summary.csv	A12a7	hsa-miR-27b#	Target	MSC2		20.702	20.702
F:\OpenArray\Cycling Data\OA-20 (Mesenchymal Stem Cells) Cycling Data Summary.csv	B11b7	hsa-miR-361-3p	Target	MSC26		26.965	26.965
F:\OpenArray\Cycling Data\OA-20 (Mesenchymal Stem Cells) Cycling Data Summary.csv	B11b7	hsa-miR-361-3p	Target	MSC23		27.245	27.245
F:\OpenArray\Cycling Data\OA-20 (Mesenchymal Stem Cells) Cycling Data Summary.csv	B7b7	hsa-miR-361-3p	Target	MSC22		23.295	23.295
F:\OpenArray\Cycling Data\OA-20 (Mesenchymal Stem Cells) Cycling Data Summary.csv	B3b7	hsa-miR-361-3p	Target	MSC21		24.946	24.946
F:\OpenArray\Cycling Data\OA-20 (Mesenchymal Stem Cells) Cycling Data Summary.csv	B11b7	hsa-miR-361-3p	Target	MSC29		22.969	22.969
F:\OpenArray\Cycling Data\OA-20 (Mesenchymal Stem Cells) Cycling Data Summary.csv	A4a7	hsa-miR-27b#	Target	MSC9		22.41	22.41
F:\OpenArray\Cycling Data\OA-20 (Mesenchymal Stem Cells) Cycling Data Summary.csv	D8d1	hsa-miR-616	Target	MSC19		28.949	28.949
F:\OpenArray\Cycling Data\OA-20 (Mesenchymal Stem Cells) Cycling Data Summary.csv	D8d1	hsa-miR-616	Target	MSC16		25.213	25.213
F:\OpenArray\Cycling Data\OA-20 (Mesenchymal Stem Cells) Cycling Data Summary.csv	D4d1	hsa-miR-616	Target	MSC15		27.284	27.284
F:\OpenArray\Cycling Data\OA-20 (Mesenchymal Stem Cells) Cycling Data Summary.csv	D4d1	hsa-miR-616	Target	MSC18		29.116	29.116
F:\OpenArray\Cycling Data\OA-20 (Mesenchymal Stem Cells) Cycling Data Summary.csv	D12d1	hsa-miR-616	Target	MSC17		25.27	25.27
F:\OpenArray\Cycling Data\OA-20 (Mesenchymal Stem Cells) Cycling Data Summary.csv	D4d1	hsa-miR-616	Target	MSC12		25.949	25.949
F:\OpenArray\Cycling Data\OA-20 (Mesenchymal Stem Cells) Cycling Data Summary.csv	D12d1	hsa-miR-616	Target	MSC14		26.908	26.908
F:\OpenArray\Cycling Data\OA-20 (Mesenchymal Stem Cells) Cycling Data Summary.csv	D8d1	hsa-miR-616	Target	MSC13		25.497	25.497
F:\OpenArray\Cycling Data\OA-20 (Mesenchymal Stem Cells) Cycling Data Summary.csv	C9b4	hsa-miR-431	Target	MSC2		20.081	20.081
F:\OpenArray\Cycling Data\OA-20 (Mesenchymal Stem Cells) Cycling Data Summary.csv	C1b4	hsa-miR-431	Target	MSC3		18.818	18.818
F:\OpenArray\Cycling Data\OA-20 (Mesenchymal Stem Cells) Cycling Data Summary.csv	C5b4	hsa-miR-431	Target	MSC4		19.934	19.934
F:\OpenArray\Cycling Data\OA-20 (Mesenchymal Stem Cells) Cycling Data Summary.csv	C9b4	hsa-miR-431	Target	MSC5		25.734	25.734
F:\OpenArray\Cycling Data\OA-20 (Mesenchymal Stem Cells) Cycling Data Summary.csv	C5b4	hsa-miR-431	Target	MSC7		19.652	19.652
F:\OpenArray\Cycling Data\OA-20 (Mesenchymal Stem Cells) Cycling Data Summary.csv	C9b4	hsa-miR-431	Target	MSC8		22.515	22.515
F:\OpenArray\Cycling Data\OA-20 (Mesenchymal Stem Cells) Cycling Data Summary.csv	D12g5	hsa-miR-99a#	Target	MSC14		25.661	25.661
F:\OpenArray\Cycling Data\OA-20 (Mesenchymal Stem Cells) Cycling Data Summary.csv	D4g5	hsa-miR-99a#	Target	MSC15		26.047	26.047
F:\OpenArray\Cycling Data\OA-20 (Mesenchymal Stem Cells) Cycling Data Summary.csv	D8g5	hsa-miR-99a#	Target	MSC16		27.423	27.423
F:\OpenArray\Cycling Data\OA-20 (Mesenchymal Stem Cells) Cycling Data Summary.csv	D12g5	hsa-miR-99a#	Target	MSC17		24.568	24.568
F:\OpenArray\Cycling Data\OA-20 (Mesenchymal Stem Cells) Cycling Data Summary.csv	D8g5	hsa-miR-99a#	Target	MSC19		26.858	26.858
F:\OpenArray\Cycling Data\OA-20 (Mesenchymal Stem Cells) Cycling Data Summary.csv	D5b2	hsa-miR-25	Target	MSC7		21.438	21.438
F:\OpenArray\Cycling Data\OA-20 (Mesenchymal Stem Cells) Cycling Data Summary.csv	D1b2	hsa-miR-25	Target	MSC6		20.279	20.279
F:\OpenArray\Cycling Data\OA-20 (Mesenchymal Stem Cells) Cycling Data Summary.csv	D9b2	hsa-miR-25	Target	MSC5		28.619	28.619
F:\OpenArray\Cycling Data\OA-20 (Mesenchymal Stem Cells) Cycling Data Summary.csv	D5b2	hsa-miR-25	Target	MSC4		21.494	21.494
F:\OpenArray\Cycling Data\OA-20 (Mesenchymal Stem Cells) Cycling Data Summary.csv	D1b2	hsa-miR-25	Target	MSC9		19.799	19.799
F:\OpenArray\Cycling Data\OA-20 (Mesenchymal Stem Cells) Cycling Data Summary.csv	D9b2	hsa-miR-25	Target	MSC8		24.183	24.183
F:\OpenArray\Cycling Data\OA-20 (Mesenchymal Stem Cells) Cycling Data Summary.csv	D1b2	hsa-miR-25	Target	MSC3		19.316	19.316
F:\OpenArray\Cycling Data\OA-20 (Mesenchymal Stem Cells) Cycling Data Summary.csv	D12g5	hsa-miR-99a#	Target	MSC11		28.536	28.536
F:\OpenArray\Cycling Data\OA-20 (Mesenchymal Stem Cells) Cycling Data Summary.csv	D8g5	hsa-miR-99a#	Target	MSC10		29.37	29.37
F:\OpenArray\Cycling Data\OA-20 (Mesenchymal Stem Cells) Cycling Data Summary.csv	D9b2	hsa-miR-25	Target	MSC2		22.548	22.548
F:\OpenArray\Cycling Data\OA-20 (Mesenchymal Stem Cells) Cycling Data Summary.csv	D8g5	hsa-miR-99a#	Target	MSC13		30.78	30
F:\OpenArray\Cycling Data\OA-20 (Mesenchymal Stem Cells) Cycling Data Summary.csv	D4g5	hsa-miR-99a#	Target	MSC12		25.138	25.138
F:\OpenArray\Cycling Data\OA-20 (Mesenchymal Stem Cells) Cycling Data Summary.csv	D4g5	hsa-miR-99a#	Target	MSC27		27.893	27.893
F:\OpenArray\Cycling Data\OA-20 (Mesenchymal Stem Cells) Cycling Data Summary.csv	D8g5	hsa-miR-99a#	Target	MSC28		26.594	26.594
F:\OpenArray\Cycling Data\OA-20 (Mesenchymal Stem Cells) Cycling Data Summary.csv	D8g5	hsa-miR-99a#	Target	MSC25		26.743	26.743
F:\OpenArray\Cycling Data\OA-20 (Mesenchymal Stem Cells) Cycling Data Summary.csv	D12g5	hsa-miR-99a#	Target	MSC29		24.418	24.418
F:\OpenArray\Cycling Data\OA-20 (Mesenchymal Stem Cells) Cycling Data Summary.csv	D12g5	hsa-miR-99a#	Target	MSC20		26.389	26.389
F:\OpenArray\Cycling Data\OA-20 (Mesenchymal Stem Cells) Cycling Data Summary.csv	D4g5	hsa-miR-99a#	Target	MSC24		26.426	26.426
F:\OpenArray\Cycling Data\OA-20 (Mesenchymal Stem Cells) Cycling Data Summary.csv	D8g5	hsa-miR-99a#	Target	MSC22		24.737	24.737
F:\OpenArray\Cycling Data\OA-20 (Mesenchymal Stem Cells) Cycling Data Summary.csv	D4g5	hsa-miR-99a#	Target	MSC21		25.93	25.93
F:\OpenArray\Cycling Data\OA-20 (Mesenchymal Stem Cells) Cycling Data Summary.csv	A8b6	hsa-miR-193b#	Target	MSC25		21.702	21.702
F:\OpenArray\Cycling Data\OA-20 (Mesenchymal Stem Cells) Cycling Data Summary.csv	A12b6	hsa-miR-193b#	Target	MSC26		21.815	21.815
F:\OpenArray\Cycling Data\OA-20 (Mesenchymal Stem Cells) Cycling Data Summary.csv	A12b6	hsa-miR-193b#	Target	MSC23		21.923	21.923
F:\OpenArray\Cycling Data\OA-20 (Mesenchymal Stem Cells) Cycling Data Summary.csv	A4b6	hsa-miR-193b#	Target	MSC24		20.68	20.68
F:\OpenArray\Cycling Data\OA-20 (Mesenchymal Stem Cells) Cycling Data Summary.csv	A12b6	hsa-miR-193b#	Target	MSC29		21.12	21.12
F:\OpenArray\Cycling Data\OA-20 (Mesenchymal Stem Cells) Cycling Data Summary.csv	D12c4	HSA-MIR-1303	Target	MSC2		26.569	26.569
F:\OpenArray\Cycling Data\OA-20 (Mesenchymal Stem Cells) Cycling Data Summary.csv	A4b6	hsa-miR-193b#	Target	MSC27		21.926	21.926
F:\OpenArray\Cycling Data\OA-20 (Mesenchymal Stem Cells) Cycling Data Summary.csv	A8b6	hsa-miR-193b#	Target	MSC28		21.173	21.173
F:\OpenArray\Cycling Data\OA-20 (Mesenchymal Stem Cells) Cycling Data Summary.csv	A2c5	hsa-let-7g	Target	MSC12		19.07	19.07
F:\OpenArray\Cycling Data\OA-20 (Mesenchymal Stem Cells) Cycling Data Summary.csv	A10c5	hsa-let-7g	Target	MSC11		18.031	18.031
F:\OpenArray\Cycling Data\OA-20 (Mesenchymal Stem Cells) Cycling Data Summary.csv	A11e8	hsa-miR-125b-2#	Target	MSC2		29.863	29.863
F:\OpenArray\Cycling Data\OA-20 (Mesenchymal Stem Cells) Cycling Data Summary.csv	A10c5	hsa-let-7g	Target	MSC14		17.879	17.879
F:\OpenArray\Cycling Data\OA-20 (Mesenchymal Stem Cells) Cycling Data Summary.csv	A6c5	hsa-let-7g	Target	MSC13		17.668	17.668
F:\OpenArray\Cycling Data\OA-20 (Mesenchymal Stem Cells) Cycling Data Summary.csv	A6c5	hsa-let-7g	Target	MSC10		18.073	18.073
F:\OpenArray\Cycling Data\OA-20 (Mesenchymal Stem Cells) Cycling Data Summary.csv	A6c5	hsa-let-7g	Target	MSC19		17.743	17.743
F:\OpenArray\Cycling Data\OA-20 (Mesenchymal Stem Cells) Cycling Data Summary.csv	A6c5	hsa-let-7g	Target	MSC16		17.31	17.31
F:\OpenArray\Cycling Data\OA-20 (Mesenchymal Stem Cells) Cycling Data Summary.csv	A2c5	hsa-let-7g	Target	MSC15		17.646	17.646
F:\OpenArray\Cycling Data\OA-20 (Mesenchymal Stem Cells) Cycling Data Summary.csv	A2c5	hsa-let-7g	Target	MSC18		19.188	19.188
F:\OpenArray\Cycling Data\OA-20 (Mesenchymal Stem Cells) Cycling Data Summary.csv	A10c5	hsa-let-7g	Target	MSC17		17.028	17.028
F:\OpenArray\Cycling Data\OA-20 (Mesenchymal Stem Cells) Cycling Data Summary.csv	C9b5	hsa-miR-29b	Target	MSC8		24.07	24.07
F:\OpenArray\Cycling Data\OA-20 (Mesenchymal Stem Cells) Cycling Data Summary.csv	C1b5	hsa-miR-29b	Target	MSC9		21.261	21.261
F:\OpenArray\Cycling Data\OA-20 (Mesenchymal Stem Cells) Cycling Data Summary.csv	C9b5	hsa-miR-29b	Target	MSC2		21.276	21.276
F:\OpenArray\Cycling Data\OA-20 (Mesenchymal Stem Cells) Cycling Data Summary.csv	C1b5	hsa-miR-29b	Target	MSC3		19.334	19.334
F:\OpenArray\Cycling Data\OA-20 (Mesenchymal Stem Cells) Cycling Data Summary.csv	A1f3	hsa-miR-129	Target	MSC21		26.319	26.319
F:\OpenArray\Cycling Data\OA-20 (Mesenchymal Stem Cells) Cycling Data Summary.csv	C1b5	hsa-miR-29b	Target	MSC6		18.991	18.991
F:\OpenArray\Cycling Data\OA-20 (Mesenchymal Stem Cells) Cycling Data Summary.csv	C5b5	hsa-miR-29b	Target	MSC7		19.843	19.843
F:\OpenArray\Cycling Data\OA-20 (Mesenchymal Stem Cells) Cycling Data Summary.csv	C5b5	hsa-miR-29b	Target	MSC4		19.475	19.475
F:\OpenArray\Cycling Data\OA-20 (Mesenchymal Stem Cells) Cycling Data Summary.csv	C9b5	hsa-miR-29b	Target	MSC5		27.498	27.498
F:\OpenArray\Cycling Data\OA-20 (Mesenchymal Stem Cells) Cycling Data Summary.csv	A7c2	hsa-miR-218-2#	Target	MSC4		28.458	28.458
F:\OpenArray\Cycling Data\OA-20 (Mesenchymal Stem Cells) Cycling Data Summary.csv	B5b2	hsa-miR-224	Target	MSC7		19.119	19.119
F:\OpenArray\Cycling Data\OA-20 (Mesenchymal Stem Cells) Cycling Data Summary.csv	B9b2	hsa-miR-224	Target	MSC8		20.919	20.919
F:\OpenArray\Cycling Data\OA-20 (Mesenchymal Stem Cells) Cycling Data Summary.csv	B1b2	hsa-miR-224	Target	MSC9		18.836	18.836
F:\OpenArray\Cycling Data\OA-20 (Mesenchymal Stem Cells) Cycling Data Summary.csv	A9a3	hsa-miR-424	Target	MSC11		28.114	28.114
F:\OpenArray\Cycling Data\OA-20 (Mesenchymal Stem Cells) Cycling Data Summary.csv	A5a3	hsa-miR-424	Target	MSC19		30.441	30
F:\OpenArray\Cycling Data\OA-20 (Mesenchymal Stem Cells) Cycling Data Summary.csv	A5a3	hsa-miR-424	Target	MSC16		34.512	30
F:\OpenArray\Cycling Data\OA-20 (Mesenchymal Stem Cells) Cycling Data Summary.csv	A1a3	hsa-miR-424	Target	MSC15		25.943	25.943
F:\OpenArray\Cycling Data\OA-20 (Mesenchymal Stem Cells) Cycling Data Summary.csv	A11b1	hsa-miR-30a-5p	Target	MSC11		20.22	20.22
F:\OpenArray\Cycling Data\OA-20 (Mesenchymal Stem Cells) Cycling Data Summary.csv	A7b1	hsa-miR-30a-5p	Target	MSC10		19.461	19.461
F:\OpenArray\Cycling Data\OA-20 (Mesenchymal Stem Cells) Cycling Data Summary.csv	A7b1	hsa-miR-30a-5p	Target	MSC13		23.049	23.049
F:\OpenArray\Cycling Data\OA-20 (Mesenchymal Stem Cells) Cycling Data Summary.csv	A3b1	hsa-miR-30a-5p	Target	MSC12		26.409	26.409
F:\OpenArray\Cycling Data\OA-20 (Mesenchymal Stem Cells) Cycling Data Summary.csv	A3b1	hsa-miR-30a-5p	Target	MSC15		21.497	21.497
F:\OpenArray\Cycling Data\OA-20 (Mesenchymal Stem Cells) Cycling Data Summary.csv	A11b1	hsa-miR-30a-5p	Target	MSC14		20.248	20.248
F:\OpenArray\Cycling Data\OA-20 (Mesenchymal Stem Cells) Cycling Data Summary.csv	C9c2	hsa-miR-382	Target	MSC11		19.127	19.127
F:\OpenArray\Cycling Data\OA-20 (Mesenchymal Stem Cells) Cycling Data Summary.csv	D2g5	mmu-miR-615	Target	MSC15		20.299	20.299
F:\OpenArray\Cycling Data\OA-20 (Mesenchymal Stem Cells) Cycling Data Summary.csv	C1c2	hsa-miR-382	Target	MSC12		21.563	21.563
F:\OpenArray\Cycling Data\OA-20 (Mesenchymal Stem Cells) Cycling Data Summary.csv	C5c2	hsa-miR-382	Target	MSC10		18.26	18.26
F:\OpenArray\Cycling Data\OA-20 (Mesenchymal Stem Cells) Cycling Data Summary.csv	C8b1	HSA-MIR-1180	Target	MSC7		25.936	25.936
F:\OpenArray\Cycling Data\OA-20 (Mesenchymal Stem Cells) Cycling Data Summary.csv	B7c3	HSA-MIR-151-5P	Target	MSC28		20.419	20.419
F:\OpenArray\Cycling Data\OA-20 (Mesenchymal Stem Cells) Cycling Data Summary.csv	B11c3	HSA-MIR-151-5P	Target	MSC29		19.656	19.656
F:\OpenArray\Cycling Data\OA-20 (Mesenchymal Stem Cells) Cycling Data Summary.csv	C4b1	HSA-MIR-1180	Target	MSC9		24.843	24.843
F:\OpenArray\Cycling Data\OA-20 (Mesenchymal Stem Cells) Cycling Data Summary.csv	B11c3	HSA-MIR-151-5P	Target	MSC26		24.248	24.248
F:\OpenArray\Cycling Data\OA-20 (Mesenchymal Stem Cells) Cycling Data Summary.csv	B3c3	HSA-MIR-151-5P	Target	MSC27		21.722	21.722
F:\OpenArray\Cycling Data\OA-20 (Mesenchymal Stem Cells) Cycling Data Summary.csv	A7b1	hsa-miR-30a-5p	Target	MSC16		23.763	23.763
F:\OpenArray\Cycling Data\OA-20 (Mesenchymal Stem Cells) Cycling Data Summary.csv	B11c3	HSA-MIR-151-5P	Target	MSC20		22.339	22.339
F:\OpenArray\Cycling Data\OA-20 (Mesenchymal Stem Cells) Cycling Data Summary.csv	A11b1	hsa-miR-30a-5p	Target	MSC17		23.709	23.709
F:\OpenArray\Cycling Data\OA-20 (Mesenchymal Stem Cells) Cycling Data Summary.csv	B3c3	HSA-MIR-151-5P	Target	MSC21		22.178	22.178
F:\OpenArray\Cycling Data\OA-20 (Mesenchymal Stem Cells) Cycling Data Summary.csv	A3b1	hsa-miR-30a-5p	Target	MSC18		26.319	26.319
F:\OpenArray\Cycling Data\OA-20 (Mesenchymal Stem Cells) Cycling Data Summary.csv	A7b1	hsa-miR-30a-5p	Target	MSC19		24.787	24.787
F:\OpenArray\Cycling Data\OA-20 (Mesenchymal Stem Cells) Cycling Data Summary.csv	B3c3	HSA-MIR-151-5P	Target	MSC24		21.81	21.81
F:\OpenArray\Cycling Data\OA-20 (Mesenchymal Stem Cells) Cycling Data Summary.csv	B7c3	HSA-MIR-151-5P	Target	MSC25		21.206	21.206
F:\OpenArray\Cycling Data\OA-20 (Mesenchymal Stem Cells) Cycling Data Summary.csv	B7c3	HSA-MIR-151-5P	Target	MSC22		20.404	20.404
F:\OpenArray\Cycling Data\OA-20 (Mesenchymal Stem Cells) Cycling Data Summary.csv	B11c3	HSA-MIR-151-5P	Target	MSC23		24.402	24.402
F:\OpenArray\Cycling Data\OA-20 (Mesenchymal Stem Cells) Cycling Data Summary.csv	B1b2	hsa-miR-224	Target	MSC6		18.939	18.939
F:\OpenArray\Cycling Data\OA-20 (Mesenchymal Stem Cells) Cycling Data Summary.csv	C6d1	hsa-miR-654	Target	MSC10		20.785	20.785
F:\OpenArray\Cycling Data\OA-20 (Mesenchymal Stem Cells) Cycling Data Summary.csv	B9b2	hsa-miR-224	Target	MSC5		26.121	26.121
F:\OpenArray\Cycling Data\OA-20 (Mesenchymal Stem Cells) Cycling Data Summary.csv	B5b2	hsa-miR-224	Target	MSC4		21.728	21.728
F:\OpenArray\Cycling Data\OA-20 (Mesenchymal Stem Cells) Cycling Data Summary.csv	B1b2	hsa-miR-224	Target	MSC3		20.86	20.86
F:\OpenArray\Cycling Data\OA-20 (Mesenchymal Stem Cells) Cycling Data Summary.csv	D10g5	mmu-miR-615	Target	MSC29		21.182	21.182
F:\OpenArray\Cycling Data\OA-20 (Mesenchymal Stem Cells) Cycling Data Summary.csv	B9b2	hsa-miR-224	Target	MSC2		21.453	21.453
F:\OpenArray\Cycling Data\OA-20 (Mesenchymal Stem Cells) Cycling Data Summary.csv	D6g5	mmu-miR-615	Target	MSC28		21.068	21.068
F:\OpenArray\Cycling Data\OA-20 (Mesenchymal Stem Cells) Cycling Data Summary.csv	C2d1	hsa-miR-654	Target	MSC18		22.832	22.832
F:\OpenArray\Cycling Data\OA-20 (Mesenchymal Stem Cells) Cycling Data Summary.csv	C12b1	HSA-MIR-1180	Target	MSC2		24.755	24.755
F:\OpenArray\Cycling Data\OA-20 (Mesenchymal Stem Cells) Cycling Data Summary.csv	C10d1	hsa-miR-654	Target	MSC17		20.299	20.299
F:\OpenArray\Cycling Data\OA-20 (Mesenchymal Stem Cells) Cycling Data Summary.csv	C1c2	hsa-miR-382	Target	MSC21		16.944	16.944
F:\OpenArray\Cycling Data\OA-20 (Mesenchymal Stem Cells) Cycling Data Summary.csv	C5c2	hsa-miR-382	Target	MSC22		18.714	18.714
F:\OpenArray\Cycling Data\OA-20 (Mesenchymal Stem Cells) Cycling Data Summary.csv	D2g5	mmu-miR-615	Target	MSC27		21.31	21.31
F:\OpenArray\Cycling Data\OA-20 (Mesenchymal Stem Cells) Cycling Data Summary.csv	C6d1	hsa-miR-654	Target	MSC19		19.717	19.717
F:\OpenArray\Cycling Data\OA-20 (Mesenchymal Stem Cells) Cycling Data Summary.csv	C4b1	HSA-MIR-1180	Target	MSC6		24.778	24.778
F:\OpenArray\Cycling Data\OA-20 (Mesenchymal Stem Cells) Cycling Data Summary.csv	D2g5	mmu-miR-615	Target	MSC21		21.137	21.137
F:\OpenArray\Cycling Data\OA-20 (Mesenchymal Stem Cells) Cycling Data Summary.csv	C12b1	HSA-MIR-1180	Target	MSC5		25.702	25.702
F:\OpenArray\Cycling Data\OA-20 (Mesenchymal Stem Cells) Cycling Data Summary.csv	C8b1	HSA-MIR-1180	Target	MSC4		24.387	24.387
F:\OpenArray\Cycling Data\OA-20 (Mesenchymal Stem Cells) Cycling Data Summary.csv	C6d1	hsa-miR-654	Target	MSC16		20.979	20.979
F:\OpenArray\Cycling Data\OA-20 (Mesenchymal Stem Cells) Cycling Data Summary.csv	C4b1	HSA-MIR-1180	Target	MSC3		23.671	23.671
F:\OpenArray\Cycling Data\OA-20 (Mesenchymal Stem Cells) Cycling Data Summary.csv	C2d1	hsa-miR-654	Target	MSC15		20.477	20.477
F:\OpenArray\Cycling Data\OA-20 (Mesenchymal Stem Cells) Cycling Data Summary.csv	D6g5	mmu-miR-615	Target	MSC22		21.27	21.27
F:\OpenArray\Cycling Data\OA-20 (Mesenchymal Stem Cells) Cycling Data Summary.csv	B3c3	HSA-MIR-151-5P	Target	MSC15		22.597	22.597
F:\OpenArray\Cycling Data\OA-20 (Mesenchymal Stem Cells) Cycling Data Summary.csv	A3d3	hsa-miR-190b	Target	MSC27		28.358	28.358
F:\OpenArray\Cycling Data\OA-20 (Mesenchymal Stem Cells) Cycling Data Summary.csv	C9c2	hsa-miR-382	Target	MSC17		19.659	19.659
F:\OpenArray\Cycling Data\OA-20 (Mesenchymal Stem Cells) Cycling Data Summary.csv	B7c3	HSA-MIR-151-5P	Target	MSC16		21.243	21.243
F:\OpenArray\Cycling Data\OA-20 (Mesenchymal Stem Cells) Cycling Data Summary.csv	A7d3	hsa-miR-190b	Target	MSC28		29.095	29.095
F:\OpenArray\Cycling Data\OA-20 (Mesenchymal Stem Cells) Cycling Data Summary.csv	B11c3	HSA-MIR-151-5P	Target	MSC17		21.629	21.629
F:\OpenArray\Cycling Data\OA-20 (Mesenchymal Stem Cells) Cycling Data Summary.csv	A7d3	hsa-miR-190b	Target	MSC25		29.289	29.289
F:\OpenArray\Cycling Data\OA-20 (Mesenchymal Stem Cells) Cycling Data Summary.csv	B3c3	HSA-MIR-151-5P	Target	MSC18		24.298	24.298
F:\OpenArray\Cycling Data\OA-20 (Mesenchymal Stem Cells) Cycling Data Summary.csv	B7c3	HSA-MIR-151-5P	Target	MSC19		21.832	21.832
F:\OpenArray\Cycling Data\OA-20 (Mesenchymal Stem Cells) Cycling Data Summary.csv	C9c2	hsa-miR-382	Target	MSC14		20.654	20.654
F:\OpenArray\Cycling Data\OA-20 (Mesenchymal Stem Cells) Cycling Data Summary.csv	A11d3	hsa-miR-190b	Target	MSC29		26.658	26.658
F:\OpenArray\Cycling Data\OA-20 (Mesenchymal Stem Cells) Cycling Data Summary.csv	C5c2	hsa-miR-382	Target	MSC16		18.825	18.825
F:\OpenArray\Cycling Data\OA-20 (Mesenchymal Stem Cells) Cycling Data Summary.csv	C1c2	hsa-miR-382	Target	MSC15		17.024	17.024
F:\OpenArray\Cycling Data\OA-20 (Mesenchymal Stem Cells) Cycling Data Summary.csv	A11d3	hsa-miR-190b	Target	MSC20		27.286	27.286
F:\OpenArray\Cycling Data\OA-20 (Mesenchymal Stem Cells) Cycling Data Summary.csv	B7c3	HSA-MIR-151-5P	Target	MSC10		21.646	21.646
F:\OpenArray\Cycling Data\OA-20 (Mesenchymal Stem Cells) Cycling Data Summary.csv	B11c3	HSA-MIR-151-5P	Target	MSC11		22.042	22.042
F:\OpenArray\Cycling Data\OA-20 (Mesenchymal Stem Cells) Cycling Data Summary.csv	A11d3	hsa-miR-190b	Target	MSC23		28.608	28.608
F:\OpenArray\Cycling Data\OA-20 (Mesenchymal Stem Cells) Cycling Data Summary.csv	B3c3	HSA-MIR-151-5P	Target	MSC12		22.177	22.177
F:\OpenArray\Cycling Data\OA-20 (Mesenchymal Stem Cells) Cycling Data Summary.csv	B7c3	HSA-MIR-151-5P	Target	MSC13		22.006	22.006
F:\OpenArray\Cycling Data\OA-20 (Mesenchymal Stem Cells) Cycling Data Summary.csv	A3d3	hsa-miR-190b	Target	MSC21		28.454	28.454
F:\OpenArray\Cycling Data\OA-20 (Mesenchymal Stem Cells) Cycling Data Summary.csv	B11c3	HSA-MIR-151-5P	Target	MSC14		21.508	21.508
F:\OpenArray\Cycling Data\OA-20 (Mesenchymal Stem Cells) Cycling Data Summary.csv	A7d3	hsa-miR-190b	Target	MSC22		27.452	27.452
F:\OpenArray\Cycling Data\OA-20 (Mesenchymal Stem Cells) Cycling Data Summary.csv	C10d1	hsa-miR-654	Target	MSC26		23.31	23.31
F:\OpenArray\Cycling Data\OA-20 (Mesenchymal Stem Cells) Cycling Data Summary.csv	C2d1	hsa-miR-654	Target	MSC27		21.285	21.285
F:\OpenArray\Cycling Data\OA-20 (Mesenchymal Stem Cells) Cycling Data Summary.csv	C2d1	hsa-miR-654	Target	MSC24		20.156	20.156
F:\OpenArray\Cycling Data\OA-20 (Mesenchymal Stem Cells) Cycling Data Summary.csv	C6d1	hsa-miR-654	Target	MSC25		20.213	20.213
F:\OpenArray\Cycling Data\OA-20 (Mesenchymal Stem Cells) Cycling Data Summary.csv	C6d1	hsa-miR-654	Target	MSC28		20.289	20.289
F:\OpenArray\Cycling Data\OA-20 (Mesenchymal Stem Cells) Cycling Data Summary.csv	C10d1	hsa-miR-654	Target	MSC29		20.134	20.134
F:\OpenArray\Cycling Data\OA-20 (Mesenchymal Stem Cells) Cycling Data Summary.csv	C6d1	hsa-miR-654	Target	MSC22		20.115	20.115
F:\OpenArray\Cycling Data\OA-20 (Mesenchymal Stem Cells) Cycling Data Summary.csv	C10d1	hsa-miR-654	Target	MSC23		24.406	24.406
F:\OpenArray\Cycling Data\OA-20 (Mesenchymal Stem Cells) Cycling Data Summary.csv	C10d1	hsa-miR-654	Target	MSC20		20.139	20.139
F:\OpenArray\Cycling Data\OA-20 (Mesenchymal Stem Cells) Cycling Data Summary.csv	C2d1	hsa-miR-654	Target	MSC21		20.922	20.922
F:\OpenArray\Cycling Data\OA-20 (Mesenchymal Stem Cells) Cycling Data Summary.csv	C12a5	hsa-miR-578	Target	MSC17		30.09	30
F:\OpenArray\Cycling Data\OA-20 (Mesenchymal Stem Cells) Cycling Data Summary.csv	C1c2	hsa-miR-382	Target	MSC24		16.866	16.866
F:\OpenArray\Cycling Data\OA-20 (Mesenchymal Stem Cells) Cycling Data Summary.csv	C5c2	hsa-miR-382	Target	MSC25		18.168	18.168
F:\OpenArray\Cycling Data\OA-20 (Mesenchymal Stem Cells) Cycling Data Summary.csv	A11d3	hsa-miR-190b	Target	MSC17		28.633	28.633
F:\OpenArray\Cycling Data\OA-20 (Mesenchymal Stem Cells) Cycling Data Summary.csv	C5c2	hsa-miR-382	Target	MSC28		18.381	18.381
F:\OpenArray\Cycling Data\OA-20 (Mesenchymal Stem Cells) Cycling Data Summary.csv	C9c2	hsa-miR-382	Target	MSC29		17.154	17.154
F:\OpenArray\Cycling Data\OA-20 (Mesenchymal Stem Cells) Cycling Data Summary.csv	A7d3	hsa-miR-190b	Target	MSC16		28.213	28.213
F:\OpenArray\Cycling Data\OA-20 (Mesenchymal Stem Cells) Cycling Data Summary.csv	C2d5	hsa-miR-125b	Target	MSC21		13.198	13.198
F:\OpenArray\Cycling Data\OA-20 (Mesenchymal Stem Cells) Cycling Data Summary.csv	C6d5	hsa-miR-125b	Target	MSC22		12.943	12.943
F:\OpenArray\Cycling Data\OA-20 (Mesenchymal Stem Cells) Cycling Data Summary.csv	C10d5	hsa-miR-125b	Target	MSC23		15.586	15.586
F:\OpenArray\Cycling Data\OA-20 (Mesenchymal Stem Cells) Cycling Data Summary.csv	C2d5	hsa-miR-125b	Target	MSC24		13.778	13.778
F:\OpenArray\Cycling Data\OA-20 (Mesenchymal Stem Cells) Cycling Data Summary.csv	C6d5	hsa-miR-125b	Target	MSC25		12.719	12.719
F:\OpenArray\Cycling Data\OA-20 (Mesenchymal Stem Cells) Cycling Data Summary.csv	C10d5	hsa-miR-125b	Target	MSC26		16.52	16.52
F:\OpenArray\Cycling Data\OA-20 (Mesenchymal Stem Cells) Cycling Data Summary.csv	C2d5	hsa-miR-125b	Target	MSC27		12.598	12.598
F:\OpenArray\Cycling Data\OA-20 (Mesenchymal Stem Cells) Cycling Data Summary.csv	C6d5	hsa-miR-125b	Target	MSC28		12.253	12.253
F:\OpenArray\Cycling Data\OA-20 (Mesenchymal Stem Cells) Cycling Data Summary.csv	C10d5	hsa-miR-125b	Target	MSC29		11.55	11.55
F:\OpenArray\Cycling Data\OA-20 (Mesenchymal Stem Cells) Cycling Data Summary.csv	D9a7	hsa-miR-24	Target	MSC29		10.133	10.133
F:\OpenArray\Cycling Data\OA-20 (Mesenchymal Stem Cells) Cycling Data Summary.csv	D9a7	hsa-miR-24	Target	MSC26		14.752	14.752
F:\OpenArray\Cycling Data\OA-20 (Mesenchymal Stem Cells) Cycling Data Summary.csv	D5a7	hsa-miR-24	Target	MSC25		11.684	11.684
F:\OpenArray\Cycling Data\OA-20 (Mesenchymal Stem Cells) Cycling Data Summary.csv	D5a7	hsa-miR-24	Target	MSC28		11.636	11.636
F:\OpenArray\Cycling Data\OA-20 (Mesenchymal Stem Cells) Cycling Data Summary.csv	D1a7	hsa-miR-24	Target	MSC27		11.882	11.882
F:\OpenArray\Cycling Data\OA-20 (Mesenchymal Stem Cells) Cycling Data Summary.csv	C10d5	hsa-miR-125b	Target	MSC20		12.431	12.431
F:\OpenArray\Cycling Data\OA-20 (Mesenchymal Stem Cells) Cycling Data Summary.csv	C6d5	hsa-miR-125b	Target	MSC16		12.603	12.603
F:\OpenArray\Cycling Data\OA-20 (Mesenchymal Stem Cells) Cycling Data Summary.csv	C10d5	hsa-miR-125b	Target	MSC17		12.656	12.656
F:\OpenArray\Cycling Data\OA-20 (Mesenchymal Stem Cells) Cycling Data Summary.csv	C7b1	hsa-miR-770-5p	Target	MSC16		25.563	25.563
F:\OpenArray\Cycling Data\OA-20 (Mesenchymal Stem Cells) Cycling Data Summary.csv	C10d5	hsa-miR-125b	Target	MSC14		13.035	13.035
F:\OpenArray\Cycling Data\OA-20 (Mesenchymal Stem Cells) Cycling Data Summary.csv	C3b1	hsa-miR-770-5p	Target	MSC18		24.375	24.375
F:\OpenArray\Cycling Data\OA-20 (Mesenchymal Stem Cells) Cycling Data Summary.csv	C2d5	hsa-miR-125b	Target	MSC15		12.41	12.41
F:\OpenArray\Cycling Data\OA-20 (Mesenchymal Stem Cells) Cycling Data Summary.csv	C2d5	hsa-miR-125b	Target	MSC12		13.169	13.169
F:\OpenArray\Cycling Data\OA-20 (Mesenchymal Stem Cells) Cycling Data Summary.csv	C6d5	hsa-miR-125b	Target	MSC13		12.247	12.247
F:\OpenArray\Cycling Data\OA-20 (Mesenchymal Stem Cells) Cycling Data Summary.csv	C3b1	hsa-miR-770-5p	Target	MSC15		25.502	25.502
F:\OpenArray\Cycling Data\OA-20 (Mesenchymal Stem Cells) Cycling Data Summary.csv	C6d5	hsa-miR-125b	Target	MSC10		13.425	13.425
F:\OpenArray\Cycling Data\OA-20 (Mesenchymal Stem Cells) Cycling Data Summary.csv	C10d5	hsa-miR-125b	Target	MSC11		13.62	13.62
F:\OpenArray\Cycling Data\OA-20 (Mesenchymal Stem Cells) Cycling Data Summary.csv	C11b1	hsa-miR-770-5p	Target	MSC14		27.094	27.094
F:\OpenArray\Cycling Data\OA-20 (Mesenchymal Stem Cells) Cycling Data Summary.csv	B2a7	hsa-miR-193b	Target	MSC3		13.714	13.714
F:\OpenArray\Cycling Data\OA-20 (Mesenchymal Stem Cells) Cycling Data Summary.csv	D1a7	hsa-miR-24	Target	MSC21		9.98	9.98
F:\OpenArray\Cycling Data\OA-20 (Mesenchymal Stem Cells) Cycling Data Summary.csv	B10a7	hsa-miR-193b	Target	MSC2		14.777	14.777
F:\OpenArray\Cycling Data\OA-20 (Mesenchymal Stem Cells) Cycling Data Summary.csv	D5a7	hsa-miR-24	Target	MSC22		10.416	10.416
F:\OpenArray\Cycling Data\OA-20 (Mesenchymal Stem Cells) Cycling Data Summary.csv	C11b1	hsa-miR-770-5p	Target	MSC11		27.269	27.269
F:\OpenArray\Cycling Data\OA-20 (Mesenchymal Stem Cells) Cycling Data Summary.csv	B6a7	hsa-miR-193b	Target	MSC1		23.828	23.828
F:\OpenArray\Cycling Data\OA-20 (Mesenchymal Stem Cells) Cycling Data Summary.csv	D9a7	hsa-miR-24	Target	MSC23		13.579	13.579
F:\OpenArray\Cycling Data\OA-20 (Mesenchymal Stem Cells) Cycling Data Summary.csv	C7b1	hsa-miR-770-5p	Target	MSC10		26.027	26.027
F:\OpenArray\Cycling Data\OA-20 (Mesenchymal Stem Cells) Cycling Data Summary.csv	D1a7	hsa-miR-24	Target	MSC24		11.659	11.659
F:\OpenArray\Cycling Data\OA-20 (Mesenchymal Stem Cells) Cycling Data Summary.csv	B6a7	hsa-miR-193b	Target	MSC7		14.486	14.486
F:\OpenArray\Cycling Data\OA-20 (Mesenchymal Stem Cells) Cycling Data Summary.csv	B2a7	hsa-miR-193b	Target	MSC6		15.258	15.258
F:\OpenArray\Cycling Data\OA-20 (Mesenchymal Stem Cells) Cycling Data Summary.csv	B10a7	hsa-miR-193b	Target	MSC5		17.989	17.989
F:\OpenArray\Cycling Data\OA-20 (Mesenchymal Stem Cells) Cycling Data Summary.csv	C2d5	hsa-miR-125b	Target	MSC18		15.027	15.027
F:\OpenArray\Cycling Data\OA-20 (Mesenchymal Stem Cells) Cycling Data Summary.csv	B6a7	hsa-miR-193b	Target	MSC4		14.809	14.809
F:\OpenArray\Cycling Data\OA-20 (Mesenchymal Stem Cells) Cycling Data Summary.csv	C6d5	hsa-miR-125b	Target	MSC19		12.362	12.362
F:\OpenArray\Cycling Data\OA-20 (Mesenchymal Stem Cells) Cycling Data Summary.csv	D9a7	hsa-miR-24	Target	MSC20		12.108	12.108
F:\OpenArray\Cycling Data\OA-20 (Mesenchymal Stem Cells) Cycling Data Summary.csv	B10a7	hsa-miR-193b	Target	MSC8		14.124	14.124
F:\OpenArray\Cycling Data\OA-20 (Mesenchymal Stem Cells) Cycling Data Summary.csv	A12a3	hsa-miR-106b#	Target	MSC2		23.315	23.315
F:\OpenArray\Cycling Data\OA-20 (Mesenchymal Stem Cells) Cycling Data Summary.csv	B2a7	hsa-miR-193b	Target	MSC9		15.515	15.515
F:\OpenArray\Cycling Data\OA-20 (Mesenchymal Stem Cells) Cycling Data Summary.csv	D5a7	hsa-miR-24	Target	MSC19		11.619	11.619
F:\OpenArray\Cycling Data\OA-20 (Mesenchymal Stem Cells) Cycling Data Summary.csv	D1a7	hsa-miR-24	Target	MSC18		14.076	14.076
F:\OpenArray\Cycling Data\OA-20 (Mesenchymal Stem Cells) Cycling Data Summary.csv	D9a7	hsa-miR-24	Target	MSC17		12.293	12.293
F:\OpenArray\Cycling Data\OA-20 (Mesenchymal Stem Cells) Cycling Data Summary.csv	D5a7	hsa-miR-24	Target	MSC16		11.623	11.623
F:\OpenArray\Cycling Data\OA-20 (Mesenchymal Stem Cells) Cycling Data Summary.csv	D1a7	hsa-miR-24	Target	MSC15		11.53	11.53
F:\OpenArray\Cycling Data\OA-20 (Mesenchymal Stem Cells) Cycling Data Summary.csv	D9a7	hsa-miR-24	Target	MSC14		13.034	13.034
F:\OpenArray\Cycling Data\OA-20 (Mesenchymal Stem Cells) Cycling Data Summary.csv	B3f5	hsa-miR-10b#	Target	MSC3		19.659	19.659
F:\OpenArray\Cycling Data\OA-20 (Mesenchymal Stem Cells) Cycling Data Summary.csv	B12c5	hsa-miR-181c#	Target	MSC17		23.026	23.026
F:\OpenArray\Cycling Data\OA-20 (Mesenchymal Stem Cells) Cycling Data Summary.csv	B7f5	hsa-miR-10b#	Target	MSC4		19.965	19.965
F:\OpenArray\Cycling Data\OA-20 (Mesenchymal Stem Cells) Cycling Data Summary.csv	C11b1	hsa-miR-770-5p	Target	MSC29		25.88	25.88
F:\OpenArray\Cycling Data\OA-20 (Mesenchymal Stem Cells) Cycling Data Summary.csv	B11f5	hsa-miR-10b#	Target	MSC5		21.624	21.624
F:\OpenArray\Cycling Data\OA-20 (Mesenchymal Stem Cells) Cycling Data Summary.csv	B3f5	hsa-miR-10b#	Target	MSC6		20.856	20.856
F:\OpenArray\Cycling Data\OA-20 (Mesenchymal Stem Cells) Cycling Data Summary.csv	B12c5	hsa-miR-181c#	Target	MSC11		24.675	24.675
F:\OpenArray\Cycling Data\OA-20 (Mesenchymal Stem Cells) Cycling Data Summary.csv	B7f5	hsa-miR-10b#	Target	MSC1		27.8	27.8
F:\OpenArray\Cycling Data\OA-20 (Mesenchymal Stem Cells) Cycling Data Summary.csv	C3b1	hsa-miR-770-5p	Target	MSC24		22.146	22.146
F:\OpenArray\Cycling Data\OA-20 (Mesenchymal Stem Cells) Cycling Data Summary.csv	B11f5	hsa-miR-10b#	Target	MSC2		19.872	19.872
F:\OpenArray\Cycling Data\OA-20 (Mesenchymal Stem Cells) Cycling Data Summary.csv	D1a7	hsa-miR-24	Target	MSC12		13.725	13.725
F:\OpenArray\Cycling Data\OA-20 (Mesenchymal Stem Cells) Cycling Data Summary.csv	C7b1	hsa-miR-770-5p	Target	MSC22		24.069	24.069
F:\OpenArray\Cycling Data\OA-20 (Mesenchymal Stem Cells) Cycling Data Summary.csv	D5a7	hsa-miR-24	Target	MSC13		12.157	12.157
F:\OpenArray\Cycling Data\OA-20 (Mesenchymal Stem Cells) Cycling Data Summary.csv	C3b1	hsa-miR-770-5p	Target	MSC21		23.253	23.253
F:\OpenArray\Cycling Data\OA-20 (Mesenchymal Stem Cells) Cycling Data Summary.csv	D5a7	hsa-miR-24	Target	MSC10		12.611	12.611
F:\OpenArray\Cycling Data\OA-20 (Mesenchymal Stem Cells) Cycling Data Summary.csv	D9a7	hsa-miR-24	Target	MSC11		12.389	12.389
F:\OpenArray\Cycling Data\OA-20 (Mesenchymal Stem Cells) Cycling Data Summary.csv	B7f5	hsa-miR-10b#	Target	MSC7		19.56	19.56
F:\OpenArray\Cycling Data\OA-20 (Mesenchymal Stem Cells) Cycling Data Summary.csv	B11f5	hsa-miR-10b#	Target	MSC8		20.72	20.72
F:\OpenArray\Cycling Data\OA-20 (Mesenchymal Stem Cells) Cycling Data Summary.csv	B3f5	hsa-miR-10b#	Target	MSC9		21.493	21.493
F:\OpenArray\Cycling Data\OA-20 (Mesenchymal Stem Cells) Cycling Data Summary.csv	A4a3	hsa-miR-106b#	Target	MSC6		22.024	22.024
F:\OpenArray\Cycling Data\OA-20 (Mesenchymal Stem Cells) Cycling Data Summary.csv	A8a3	hsa-miR-106b#	Target	MSC4		22.595	22.595
F:\OpenArray\Cycling Data\OA-20 (Mesenchymal Stem Cells) Cycling Data Summary.csv	A6a4	hsa-miR-320	Target	MSC1		23.973	23.973
F:\OpenArray\Cycling Data\OA-20 (Mesenchymal Stem Cells) Cycling Data Summary.csv	A4a3	hsa-miR-106b#	Target	MSC9		23.065	23.065
F:\OpenArray\Cycling Data\OA-20 (Mesenchymal Stem Cells) Cycling Data Summary.csv	A12a3	hsa-miR-106b#	Target	MSC8		24.128	24.128
F:\OpenArray\Cycling Data\OA-20 (Mesenchymal Stem Cells) Cycling Data Summary.csv	A8a3	hsa-miR-106b#	Target	MSC7		21.521	21.521
F:\OpenArray\Cycling Data\OA-20 (Mesenchymal Stem Cells) Cycling Data Summary.csv	A2a4	hsa-miR-320	Target	MSC6		16.96	16.96
F:\OpenArray\Cycling Data\OA-20 (Mesenchymal Stem Cells) Cycling Data Summary.csv	A6a4	hsa-miR-320	Target	MSC7		15.714	15.714
F:\OpenArray\Cycling Data\OA-20 (Mesenchymal Stem Cells) Cycling Data Summary.csv	A10a4	hsa-miR-320	Target	MSC8		14.672	14.672
F:\OpenArray\Cycling Data\OA-20 (Mesenchymal Stem Cells) Cycling Data Summary.csv	A2a4	hsa-miR-320	Target	MSC9		15.995	15.995
F:\OpenArray\Cycling Data\OA-20 (Mesenchymal Stem Cells) Cycling Data Summary.csv	A10a4	hsa-miR-320	Target	MSC2		15.698	15.698
F:\OpenArray\Cycling Data\OA-20 (Mesenchymal Stem Cells) Cycling Data Summary.csv	A2a4	hsa-miR-320	Target	MSC3		17.067	17.067
F:\OpenArray\Cycling Data\OA-20 (Mesenchymal Stem Cells) Cycling Data Summary.csv	A6a4	hsa-miR-320	Target	MSC4		16.129	16.129
F:\OpenArray\Cycling Data\OA-20 (Mesenchymal Stem Cells) Cycling Data Summary.csv	A10a4	hsa-miR-320	Target	MSC5		19.614	19.614
F:\OpenArray\Cycling Data\OA-20 (Mesenchymal Stem Cells) Cycling Data Summary.csv	B6b6	hsa-miR-369-5p	Target	MSC10		27.969	27.969
F:\OpenArray\Cycling Data\OA-20 (Mesenchymal Stem Cells) Cycling Data Summary.csv	B10b6	hsa-miR-369-5p	Target	MSC11		28.237	28.237
F:\OpenArray\Cycling Data\OA-20 (Mesenchymal Stem Cells) Cycling Data Summary.csv	B2b6	hsa-miR-369-5p	Target	MSC12		28.363	28.363
F:\OpenArray\Cycling Data\OA-20 (Mesenchymal Stem Cells) Cycling Data Summary.csv	B6b6	hsa-miR-369-5p	Target	MSC13		26.448	26.448
F:\OpenArray\Cycling Data\OA-20 (Mesenchymal Stem Cells) Cycling Data Summary.csv	C10b1	hsa-miR-26a	Target	MSC26		19.437	19.437
F:\OpenArray\Cycling Data\OA-20 (Mesenchymal Stem Cells) Cycling Data Summary.csv	C2b1	hsa-miR-26a	Target	MSC27		15.518	15.518
F:\OpenArray\Cycling Data\OA-20 (Mesenchymal Stem Cells) Cycling Data Summary.csv	C2b1	hsa-miR-26a	Target	MSC24		16.276	16.276
F:\OpenArray\Cycling Data\OA-20 (Mesenchymal Stem Cells) Cycling Data Summary.csv	C6b1	hsa-miR-26a	Target	MSC25		15.78	15.78
F:\OpenArray\Cycling Data\OA-20 (Mesenchymal Stem Cells) Cycling Data Summary.csv	C1f8	hsa-miR-190	Target	MSC27		26.074	26.074
F:\OpenArray\Cycling Data\OA-20 (Mesenchymal Stem Cells) Cycling Data Summary.csv	C5f8	hsa-miR-190	Target	MSC28		24.253	24.253
F:\OpenArray\Cycling Data\OA-20 (Mesenchymal Stem Cells) Cycling Data Summary.csv	C9f8	hsa-miR-190	Target	MSC29		28.168	28.168
F:\OpenArray\Cycling Data\OA-20 (Mesenchymal Stem Cells) Cycling Data Summary.csv	C6b1	hsa-miR-26a	Target	MSC28		14.572	14.572
F:\OpenArray\Cycling Data\OA-20 (Mesenchymal Stem Cells) Cycling Data Summary.csv	C10b1	hsa-miR-26a	Target	MSC29		13.578	13.578
F:\OpenArray\Cycling Data\OA-20 (Mesenchymal Stem Cells) Cycling Data Summary.csv	C1f8	hsa-miR-190	Target	MSC21		24.572	24.572
F:\OpenArray\Cycling Data\OA-20 (Mesenchymal Stem Cells) Cycling Data Summary.csv	C5f8	hsa-miR-190	Target	MSC22		23.874	23.874
F:\OpenArray\Cycling Data\OA-20 (Mesenchymal Stem Cells) Cycling Data Summary.csv	A3a7	hsa-miR-30d#	Target	MSC24		27.051	27.051
F:\OpenArray\Cycling Data\OA-20 (Mesenchymal Stem Cells) Cycling Data Summary.csv	A7a7	hsa-miR-30d#	Target	MSC25		27.336	27.336
F:\OpenArray\Cycling Data\OA-20 (Mesenchymal Stem Cells) Cycling Data Summary.csv	D12c6	HSA-MIR-1282	Target	MSC14		30.454	30
F:\OpenArray\Cycling Data\OA-20 (Mesenchymal Stem Cells) Cycling Data Summary.csv	A3a7	hsa-miR-30d#	Target	MSC21		26.474	26.474
F:\OpenArray\Cycling Data\OA-20 (Mesenchymal Stem Cells) Cycling Data Summary.csv	D8c6	HSA-MIR-1282	Target	MSC13		31.243	30
F:\OpenArray\Cycling Data\OA-20 (Mesenchymal Stem Cells) Cycling Data Summary.csv	A7a7	hsa-miR-30d#	Target	MSC22		25.103	25.103
F:\OpenArray\Cycling Data\OA-20 (Mesenchymal Stem Cells) Cycling Data Summary.csv	C10b1	hsa-miR-26a	Target	MSC23		18.736	18.736
F:\OpenArray\Cycling Data\OA-20 (Mesenchymal Stem Cells) Cycling Data Summary.csv	C6b1	hsa-miR-26a	Target	MSC22		14.926	14.926
F:\OpenArray\Cycling Data\OA-20 (Mesenchymal Stem Cells) Cycling Data Summary.csv	A7a7	hsa-miR-30d#	Target	MSC28		25.998	25.998
F:\OpenArray\Cycling Data\OA-20 (Mesenchymal Stem Cells) Cycling Data Summary.csv	A11a7	hsa-miR-30d#	Target	MSC29		24.825	24.825
F:\OpenArray\Cycling Data\OA-20 (Mesenchymal Stem Cells) Cycling Data Summary.csv	C2b1	hsa-miR-26a	Target	MSC21		15.134	15.134
F:\OpenArray\Cycling Data\OA-20 (Mesenchymal Stem Cells) Cycling Data Summary.csv	C10b1	hsa-miR-26a	Target	MSC20		14.948	14.948
F:\OpenArray\Cycling Data\OA-20 (Mesenchymal Stem Cells) Cycling Data Summary.csv	B9a3	hsa-let-7d	Target	MSC8		20.726	20.726
F:\OpenArray\Cycling Data\OA-20 (Mesenchymal Stem Cells) Cycling Data Summary.csv	C10b1	hsa-miR-26a	Target	MSC17		15.327	15.327
F:\OpenArray\Cycling Data\OA-20 (Mesenchymal Stem Cells) Cycling Data Summary.csv	B5a3	hsa-let-7d	Target	MSC7		18.391	18.391
F:\OpenArray\Cycling Data\OA-20 (Mesenchymal Stem Cells) Cycling Data Summary.csv	C2b1	hsa-miR-26a	Target	MSC18		18.111	18.111
F:\OpenArray\Cycling Data\OA-20 (Mesenchymal Stem Cells) Cycling Data Summary.csv	C6b1	hsa-miR-26a	Target	MSC19		15.123	15.123
F:\OpenArray\Cycling Data\OA-20 (Mesenchymal Stem Cells) Cycling Data Summary.csv	C5f8	hsa-miR-190	Target	MSC16		27.29	27.29
F:\OpenArray\Cycling Data\OA-20 (Mesenchymal Stem Cells) Cycling Data Summary.csv	B1a3	hsa-let-7d	Target	MSC9		18.173	18.173
F:\OpenArray\Cycling Data\OA-20 (Mesenchymal Stem Cells) Cycling Data Summary.csv	C9f8	hsa-miR-190	Target	MSC17		26.132	26.132
F:\OpenArray\Cycling Data\OA-20 (Mesenchymal Stem Cells) Cycling Data Summary.csv	C6b1	hsa-miR-26a	Target	MSC13		14.929	14.929
F:\OpenArray\Cycling Data\OA-20 (Mesenchymal Stem Cells) Cycling Data Summary.csv	C10b1	hsa-miR-26a	Target	MSC14		15.84	15.84
F:\OpenArray\Cycling Data\OA-20 (Mesenchymal Stem Cells) Cycling Data Summary.csv	C9b6	hsa-miR-454	Target	MSC8		18.858	18.858
F:\OpenArray\Cycling Data\OA-20 (Mesenchymal Stem Cells) Cycling Data Summary.csv	C2b1	hsa-miR-26a	Target	MSC15		15.515	15.515
F:\OpenArray\Cycling Data\OA-20 (Mesenchymal Stem Cells) Cycling Data Summary.csv	C1b6	hsa-miR-454	Target	MSC9		21.242	21.242
F:\OpenArray\Cycling Data\OA-20 (Mesenchymal Stem Cells) Cycling Data Summary.csv	C6b1	hsa-miR-26a	Target	MSC16		15.353	15.353
F:\OpenArray\Cycling Data\OA-20 (Mesenchymal Stem Cells) Cycling Data Summary.csv	C5f8	hsa-miR-190	Target	MSC10		26.769	26.769
F:\OpenArray\Cycling Data\OA-20 (Mesenchymal Stem Cells) Cycling Data Summary.csv	C9f8	hsa-miR-190	Target	MSC11		27.09	27.09
F:\OpenArray\Cycling Data\OA-20 (Mesenchymal Stem Cells) Cycling Data Summary.csv	C9f8	hsa-miR-190	Target	MSC14		27.349	27.349
F:\OpenArray\Cycling Data\OA-20 (Mesenchymal Stem Cells) Cycling Data Summary.csv	C1f8	hsa-miR-190	Target	MSC12		27.617	27.617
F:\OpenArray\Cycling Data\OA-20 (Mesenchymal Stem Cells) Cycling Data Summary.csv	B2g4	hsa-miR-487b	Target	MSC21		19.973	19.973
F:\OpenArray\Cycling Data\OA-20 (Mesenchymal Stem Cells) Cycling Data Summary.csv	C5f8	hsa-miR-190	Target	MSC13		28.035	28.035
F:\OpenArray\Cycling Data\OA-20 (Mesenchymal Stem Cells) Cycling Data Summary.csv	B10g4	hsa-miR-487b	Target	MSC20		21.777	21.777
F:\OpenArray\Cycling Data\OA-20 (Mesenchymal Stem Cells) Cycling Data Summary.csv	B10g4	hsa-miR-487b	Target	MSC11		21.647	21.647
F:\OpenArray\Cycling Data\OA-20 (Mesenchymal Stem Cells) Cycling Data Summary.csv	A7a7	hsa-miR-30d#	Target	MSC10		26.487	26.487
F:\OpenArray\Cycling Data\OA-20 (Mesenchymal Stem Cells) Cycling Data Summary.csv	B2g4	hsa-miR-487b	Target	MSC12		22.513	22.513
F:\OpenArray\Cycling Data\OA-20 (Mesenchymal Stem Cells) Cycling Data Summary.csv	B6g4	hsa-miR-487b	Target	MSC13		21.521	21.521
F:\OpenArray\Cycling Data\OA-20 (Mesenchymal Stem Cells) Cycling Data Summary.csv	B10g4	hsa-miR-487b	Target	MSC14		22.273	22.273
F:\OpenArray\Cycling Data\OA-20 (Mesenchymal Stem Cells) Cycling Data Summary.csv	B2g4	hsa-miR-487b	Target	MSC15		20.501	20.501
F:\OpenArray\Cycling Data\OA-20 (Mesenchymal Stem Cells) Cycling Data Summary.csv	A11a7	hsa-miR-30d#	Target	MSC14		29.219	29.219
F:\OpenArray\Cycling Data\OA-20 (Mesenchymal Stem Cells) Cycling Data Summary.csv	B6g4	hsa-miR-487b	Target	MSC16		20.981	20.981
F:\OpenArray\Cycling Data\OA-20 (Mesenchymal Stem Cells) Cycling Data Summary.csv	B10g4	hsa-miR-487b	Target	MSC17		21.243	21.243
F:\OpenArray\Cycling Data\OA-20 (Mesenchymal Stem Cells) Cycling Data Summary.csv	B2g4	hsa-miR-487b	Target	MSC18		21.505	21.505
F:\OpenArray\Cycling Data\OA-20 (Mesenchymal Stem Cells) Cycling Data Summary.csv	B6g4	hsa-miR-487b	Target	MSC19		21.208	21.208
F:\OpenArray\Cycling Data\OA-20 (Mesenchymal Stem Cells) Cycling Data Summary.csv	C6b1	hsa-miR-26a	Target	MSC10		16.549	16.549
F:\OpenArray\Cycling Data\OA-20 (Mesenchymal Stem Cells) Cycling Data Summary.csv	A7a7	hsa-miR-30d#	Target	MSC19		30.773	30
F:\OpenArray\Cycling Data\OA-20 (Mesenchymal Stem Cells) Cycling Data Summary.csv	C2b1	hsa-miR-26a	Target	MSC12		16.194	16.194
F:\OpenArray\Cycling Data\OA-20 (Mesenchymal Stem Cells) Cycling Data Summary.csv	C10b1	hsa-miR-26a	Target	MSC11		16.034	16.034
F:\OpenArray\Cycling Data\OA-20 (Mesenchymal Stem Cells) Cycling Data Summary.csv	B9a3	hsa-let-7d	Target	MSC2		20.557	20.557
F:\OpenArray\Cycling Data\OA-20 (Mesenchymal Stem Cells) Cycling Data Summary.csv	B1a3	hsa-let-7d	Target	MSC3		18.907	18.907
F:\OpenArray\Cycling Data\OA-20 (Mesenchymal Stem Cells) Cycling Data Summary.csv	B5a3	hsa-let-7d	Target	MSC4		19.789	19.789
F:\OpenArray\Cycling Data\OA-20 (Mesenchymal Stem Cells) Cycling Data Summary.csv	B9a3	hsa-let-7d	Target	MSC5		22.498	22.498
F:\OpenArray\Cycling Data\OA-20 (Mesenchymal Stem Cells) Cycling Data Summary.csv	B1a3	hsa-let-7d	Target	MSC6		19.09	19.09
F:\OpenArray\Cycling Data\OA-20 (Mesenchymal Stem Cells) Cycling Data Summary.csv	B6g4	hsa-miR-487b	Target	MSC10		21.535	21.535
F:\OpenArray\Cycling Data\OA-20 (Mesenchymal Stem Cells) Cycling Data Summary.csv	C9b6	hsa-miR-454	Target	MSC5		22.242	22.242
F:\OpenArray\Cycling Data\OA-20 (Mesenchymal Stem Cells) Cycling Data Summary.csv	C5b6	hsa-miR-454	Target	MSC4		19.216	19.216
F:\OpenArray\Cycling Data\OA-20 (Mesenchymal Stem Cells) Cycling Data Summary.csv	C5b6	hsa-miR-454	Target	MSC7		18.982	18.982
F:\OpenArray\Cycling Data\OA-20 (Mesenchymal Stem Cells) Cycling Data Summary.csv	C1b6	hsa-miR-454	Target	MSC6		20.348	20.348
F:\OpenArray\Cycling Data\OA-20 (Mesenchymal Stem Cells) Cycling Data Summary.csv	C5b6	hsa-miR-454	Target	MSC1		31.729	30
F:\OpenArray\Cycling Data\OA-20 (Mesenchymal Stem Cells) Cycling Data Summary.csv	C1b6	hsa-miR-454	Target	MSC3		18.233	18.233
F:\OpenArray\Cycling Data\OA-20 (Mesenchymal Stem Cells) Cycling Data Summary.csv	C9b6	hsa-miR-454	Target	MSC2		19.606	19.606
F:\OpenArray\Cycling Data\OA-20 (Mesenchymal Stem Cells) Cycling Data Summary.csv	D6f8	hsa-miR-548a	Target	MSC13		29.723	29.723
F:\OpenArray\Cycling Data\OA-20 (Mesenchymal Stem Cells) Cycling Data Summary.csv	D2f8	hsa-miR-548a	Target	MSC12		28.531	28.531
F:\OpenArray\Cycling Data\OA-20 (Mesenchymal Stem Cells) Cycling Data Summary.csv	D3a5	hsa-miR-192#	Target	MSC9		30.95	30
F:\OpenArray\Cycling Data\OA-20 (Mesenchymal Stem Cells) Cycling Data Summary.csv	A7b1	hsa-miR-30a-5p	Target	MSC28		18.703	18.703
F:\OpenArray\Cycling Data\OA-20 (Mesenchymal Stem Cells) Cycling Data Summary.csv	A3b1	hsa-miR-30a-5p	Target	MSC27		20.211	20.211
F:\OpenArray\Cycling Data\OA-20 (Mesenchymal Stem Cells) Cycling Data Summary.csv	A11b1	hsa-miR-30a-5p	Target	MSC29		16.861	16.861
F:\OpenArray\Cycling Data\OA-20 (Mesenchymal Stem Cells) Cycling Data Summary.csv	D10f8	hsa-miR-548a	Target	MSC23		28.351	28.351
F:\OpenArray\Cycling Data\OA-20 (Mesenchymal Stem Cells) Cycling Data Summary.csv	B9f2	hsa-miR-629	Target	MSC5		28.213	28.213
F:\OpenArray\Cycling Data\OA-20 (Mesenchymal Stem Cells) Cycling Data Summary.csv	D12d5	hsa-miR-629	Target	MSC5		26.733	26.733
F:\OpenArray\Cycling Data\OA-20 (Mesenchymal Stem Cells) Cycling Data Summary.csv	B5f2	hsa-miR-629	Target	MSC4		28.709	28.709
F:\OpenArray\Cycling Data\OA-20 (Mesenchymal Stem Cells) Cycling Data Summary.csv	D8d5	hsa-miR-629	Target	MSC4		25.519	25.519
F:\OpenArray\Cycling Data\OA-20 (Mesenchymal Stem Cells) Cycling Data Summary.csv	D10f8	hsa-miR-548a	Target	MSC29		27.441	27.441
F:\OpenArray\Cycling Data\OA-20 (Mesenchymal Stem Cells) Cycling Data Summary.csv	B1f2	hsa-miR-629	Target	MSC3		26.369	26.369
F:\OpenArray\Cycling Data\OA-20 (Mesenchymal Stem Cells) Cycling Data Summary.csv	D4d5	hsa-miR-629	Target	MSC3		25.826	25.826
F:\OpenArray\Cycling Data\OA-20 (Mesenchymal Stem Cells) Cycling Data Summary.csv	B9f2	hsa-miR-629	Target	MSC2		27.408	27.408
F:\OpenArray\Cycling Data\OA-20 (Mesenchymal Stem Cells) Cycling Data Summary.csv	D12d5	hsa-miR-629	Target	MSC2		24.985	24.985
F:\OpenArray\Cycling Data\OA-20 (Mesenchymal Stem Cells) Cycling Data Summary.csv	B1f2	hsa-miR-629	Target	MSC9		26.39	26.39
F:\OpenArray\Cycling Data\OA-20 (Mesenchymal Stem Cells) Cycling Data Summary.csv	D4d5	hsa-miR-629	Target	MSC9		25.982	25.982
F:\OpenArray\Cycling Data\OA-20 (Mesenchymal Stem Cells) Cycling Data Summary.csv	B10g4	hsa-miR-487b	Target	MSC29		19.95	19.95
F:\OpenArray\Cycling Data\OA-20 (Mesenchymal Stem Cells) Cycling Data Summary.csv	A11b1	hsa-miR-30a-5p	Target	MSC23		22.462	22.462
F:\OpenArray\Cycling Data\OA-20 (Mesenchymal Stem Cells) Cycling Data Summary.csv	B9f2	hsa-miR-629	Target	MSC8		27.301	27.301
F:\OpenArray\Cycling Data\OA-20 (Mesenchymal Stem Cells) Cycling Data Summary.csv	D12d5	hsa-miR-629	Target	MSC8		23.405	23.405
F:\OpenArray\Cycling Data\OA-20 (Mesenchymal Stem Cells) Cycling Data Summary.csv	A3b1	hsa-miR-30a-5p	Target	MSC24		19.611	19.611
F:\OpenArray\Cycling Data\OA-20 (Mesenchymal Stem Cells) Cycling Data Summary.csv	B6g4	hsa-miR-487b	Target	MSC28		21.134	21.134
F:\OpenArray\Cycling Data\OA-20 (Mesenchymal Stem Cells) Cycling Data Summary.csv	B5f2	hsa-miR-629	Target	MSC7		25.816	25.816
F:\OpenArray\Cycling Data\OA-20 (Mesenchymal Stem Cells) Cycling Data Summary.csv	D8d5	hsa-miR-629	Target	MSC7		23.896	23.896
F:\OpenArray\Cycling Data\OA-20 (Mesenchymal Stem Cells) Cycling Data Summary.csv	A7b1	hsa-miR-30a-5p	Target	MSC25		19.48	19.48
F:\OpenArray\Cycling Data\OA-20 (Mesenchymal Stem Cells) Cycling Data Summary.csv	B2g4	hsa-miR-487b	Target	MSC27		22.138	22.138
F:\OpenArray\Cycling Data\OA-20 (Mesenchymal Stem Cells) Cycling Data Summary.csv	B1f2	hsa-miR-629	Target	MSC6		25.682	25.682
F:\OpenArray\Cycling Data\OA-20 (Mesenchymal Stem Cells) Cycling Data Summary.csv	D4d5	hsa-miR-629	Target	MSC6		24.861	24.861
F:\OpenArray\Cycling Data\OA-20 (Mesenchymal Stem Cells) Cycling Data Summary.csv	A11b1	hsa-miR-30a-5p	Target	MSC26		21.701	21.701
F:\OpenArray\Cycling Data\OA-20 (Mesenchymal Stem Cells) Cycling Data Summary.csv	B10g4	hsa-miR-487b	Target	MSC26		24.084	24.084
F:\OpenArray\Cycling Data\OA-20 (Mesenchymal Stem Cells) Cycling Data Summary.csv	B6g4	hsa-miR-487b	Target	MSC25		21.153	21.153
F:\OpenArray\Cycling Data\OA-20 (Mesenchymal Stem Cells) Cycling Data Summary.csv	A11b1	hsa-miR-30a-5p	Target	MSC20		19.549	19.549
F:\OpenArray\Cycling Data\OA-20 (Mesenchymal Stem Cells) Cycling Data Summary.csv	B2g4	hsa-miR-487b	Target	MSC24		20.034	20.034
F:\OpenArray\Cycling Data\OA-20 (Mesenchymal Stem Cells) Cycling Data Summary.csv	A3b1	hsa-miR-30a-5p	Target	MSC21		18.343	18.343
F:\OpenArray\Cycling Data\OA-20 (Mesenchymal Stem Cells) Cycling Data Summary.csv	B10g4	hsa-miR-487b	Target	MSC23		24.536	24.536
F:\OpenArray\Cycling Data\OA-20 (Mesenchymal Stem Cells) Cycling Data Summary.csv	A7b1	hsa-miR-30a-5p	Target	MSC22		16.914	16.914
F:\OpenArray\Cycling Data\OA-20 (Mesenchymal Stem Cells) Cycling Data Summary.csv	B6g4	hsa-miR-487b	Target	MSC22		20.612	20.612
F:\OpenArray\Cycling Data\OA-20 (Mesenchymal Stem Cells) Cycling Data Summary.csv	C3f3	hsa-miR-641	Target	MSC6		29.719	29.719
F:\OpenArray\Cycling Data\OA-20 (Mesenchymal Stem Cells) Cycling Data Summary.csv	B6b6	hsa-miR-369-5p	Target	MSC25		27.314	27.314
F:\OpenArray\Cycling Data\OA-20 (Mesenchymal Stem Cells) Cycling Data Summary.csv	B10b6	hsa-miR-369-5p	Target	MSC26		31.52	30
F:\OpenArray\Cycling Data\OA-20 (Mesenchymal Stem Cells) Cycling Data Summary.csv	B2b6	hsa-miR-369-5p	Target	MSC27		29.069	29.069
F:\OpenArray\Cycling Data\OA-20 (Mesenchymal Stem Cells) Cycling Data Summary.csv	B6b6	hsa-miR-369-5p	Target	MSC28		26.79	26.79
F:\OpenArray\Cycling Data\OA-20 (Mesenchymal Stem Cells) Cycling Data Summary.csv	B10b6	hsa-miR-369-5p	Target	MSC29		26.309	26.309
F:\OpenArray\Cycling Data\OA-20 (Mesenchymal Stem Cells) Cycling Data Summary.csv	D4c6	HSA-MIR-1282	Target	MSC27		30.605	30
F:\OpenArray\Cycling Data\OA-20 (Mesenchymal Stem Cells) Cycling Data Summary.csv	D4c6	HSA-MIR-1282	Target	MSC21		26.394	26.394
F:\OpenArray\Cycling Data\OA-20 (Mesenchymal Stem Cells) Cycling Data Summary.csv	B6a4	hsa-miR-197	Target	MSC10		20.187	20.187
F:\OpenArray\Cycling Data\OA-20 (Mesenchymal Stem Cells) Cycling Data Summary.csv	B6a4	hsa-miR-197	Target	MSC13		19.36	19.36
F:\OpenArray\Cycling Data\OA-20 (Mesenchymal Stem Cells) Cycling Data Summary.csv	B10a4	hsa-miR-197	Target	MSC14		19.611	19.611
F:\OpenArray\Cycling Data\OA-20 (Mesenchymal Stem Cells) Cycling Data Summary.csv	B10a4	hsa-miR-197	Target	MSC11		20.283	20.283
F:\OpenArray\Cycling Data\OA-20 (Mesenchymal Stem Cells) Cycling Data Summary.csv	B2a4	hsa-miR-197	Target	MSC12		19.539	19.539
F:\OpenArray\Cycling Data\OA-20 (Mesenchymal Stem Cells) Cycling Data Summary.csv	B6b6	hsa-miR-369-5p	Target	MSC16		26.66	26.66
F:\OpenArray\Cycling Data\OA-20 (Mesenchymal Stem Cells) Cycling Data Summary.csv	B10b6	hsa-miR-369-5p	Target	MSC17		25.577	25.577
F:\OpenArray\Cycling Data\OA-20 (Mesenchymal Stem Cells) Cycling Data Summary.csv	B10b6	hsa-miR-369-5p	Target	MSC14		31.975	30
F:\OpenArray\Cycling Data\OA-20 (Mesenchymal Stem Cells) Cycling Data Summary.csv	B2b6	hsa-miR-369-5p	Target	MSC15		26.53	26.53
F:\OpenArray\Cycling Data\OA-20 (Mesenchymal Stem Cells) Cycling Data Summary.csv	B2b6	hsa-miR-369-5p	Target	MSC18		29.202	29.202
F:\OpenArray\Cycling Data\OA-20 (Mesenchymal Stem Cells) Cycling Data Summary.csv	B6b6	hsa-miR-369-5p	Target	MSC19		28.11	28.11
F:\OpenArray\Cycling Data\OA-20 (Mesenchymal Stem Cells) Cycling Data Summary.csv	B10b6	hsa-miR-369-5p	Target	MSC20		26.854	26.854
F:\OpenArray\Cycling Data\OA-20 (Mesenchymal Stem Cells) Cycling Data Summary.csv	B2b6	hsa-miR-369-5p	Target	MSC24		27.055	27.055
F:\OpenArray\Cycling Data\OA-20 (Mesenchymal Stem Cells) Cycling Data Summary.csv	B6b6	hsa-miR-369-5p	Target	MSC22		26.387	26.387
F:\OpenArray\Cycling Data\OA-20 (Mesenchymal Stem Cells) Cycling Data Summary.csv	B2b6	hsa-miR-369-5p	Target	MSC21		26.026	26.026
F:\OpenArray\Cycling Data\OA-20 (Mesenchymal Stem Cells) Cycling Data Summary.csv	C2b5	hsa-miR-489	Target	MSC15		28.392	28.392
F:\OpenArray\Cycling Data\OA-20 (Mesenchymal Stem Cells) Cycling Data Summary.csv	B10a4	hsa-miR-197	Target	MSC26		20.242	20.242
F:\OpenArray\Cycling Data\OA-20 (Mesenchymal Stem Cells) Cycling Data Summary.csv	C6b5	hsa-miR-489	Target	MSC16		24.38	24.38
F:\OpenArray\Cycling Data\OA-20 (Mesenchymal Stem Cells) Cycling Data Summary.csv	B2a4	hsa-miR-197	Target	MSC27		18.503	18.503
F:\OpenArray\Cycling Data\OA-20 (Mesenchymal Stem Cells) Cycling Data Summary.csv	C6b5	hsa-miR-489	Target	MSC13		21.396	21.396
F:\OpenArray\Cycling Data\OA-20 (Mesenchymal Stem Cells) Cycling Data Summary.csv	B6a4	hsa-miR-197	Target	MSC28		19.58	19.58
F:\OpenArray\Cycling Data\OA-20 (Mesenchymal Stem Cells) Cycling Data Summary.csv	B10a4	hsa-miR-197	Target	MSC29		18.398	18.398
F:\OpenArray\Cycling Data\OA-20 (Mesenchymal Stem Cells) Cycling Data Summary.csv	C10b5	hsa-miR-489	Target	MSC14		21.626	21.626
F:\OpenArray\Cycling Data\OA-20 (Mesenchymal Stem Cells) Cycling Data Summary.csv	D9b6	hsa-miR-199a-3p	Target	MSC20		15.856	15.856
F:\OpenArray\Cycling Data\OA-20 (Mesenchymal Stem Cells) Cycling Data Summary.csv	C6b5	hsa-miR-489	Target	MSC19		23.171	23.171
F:\OpenArray\Cycling Data\OA-20 (Mesenchymal Stem Cells) Cycling Data Summary.csv	C10b5	hsa-miR-489	Target	MSC17		26.377	26.377
F:\OpenArray\Cycling Data\OA-20 (Mesenchymal Stem Cells) Cycling Data Summary.csv	C2b5	hsa-miR-489	Target	MSC18		25.732	25.732
F:\OpenArray\Cycling Data\OA-20 (Mesenchymal Stem Cells) Cycling Data Summary.csv	C10b5	hsa-miR-489	Target	MSC11		24.681	24.681
F:\OpenArray\Cycling Data\OA-20 (Mesenchymal Stem Cells) Cycling Data Summary.csv	C2b5	hsa-miR-489	Target	MSC12		27.589	27.589
F:\OpenArray\Cycling Data\OA-20 (Mesenchymal Stem Cells) Cycling Data Summary.csv	C6b5	hsa-miR-489	Target	MSC10		23.895	23.895
F:\OpenArray\Cycling Data\OA-20 (Mesenchymal Stem Cells) Cycling Data Summary.csv	D9b6	hsa-miR-199a-3p	Target	MSC29		11.914	11.914
F:\OpenArray\Cycling Data\OA-20 (Mesenchymal Stem Cells) Cycling Data Summary.csv	D9b6	hsa-miR-199a-3p	Target	MSC26		18.638	18.638
F:\OpenArray\Cycling Data\OA-20 (Mesenchymal Stem Cells) Cycling Data Summary.csv	D5b6	hsa-miR-199a-3p	Target	MSC25		15.22	15.22
F:\OpenArray\Cycling Data\OA-20 (Mesenchymal Stem Cells) Cycling Data Summary.csv	D5b6	hsa-miR-199a-3p	Target	MSC28		13.769	13.769
F:\OpenArray\Cycling Data\OA-20 (Mesenchymal Stem Cells) Cycling Data Summary.csv	D1b6	hsa-miR-199a-3p	Target	MSC27		14.162	14.162
F:\OpenArray\Cycling Data\OA-20 (Mesenchymal Stem Cells) Cycling Data Summary.csv	D5b6	hsa-miR-199a-3p	Target	MSC22		14.575	14.575
F:\OpenArray\Cycling Data\OA-20 (Mesenchymal Stem Cells) Cycling Data Summary.csv	D1b6	hsa-miR-199a-3p	Target	MSC21		14.093	14.093
F:\OpenArray\Cycling Data\OA-20 (Mesenchymal Stem Cells) Cycling Data Summary.csv	D1b6	hsa-miR-199a-3p	Target	MSC24		15.143	15.143
F:\OpenArray\Cycling Data\OA-20 (Mesenchymal Stem Cells) Cycling Data Summary.csv	D9b6	hsa-miR-199a-3p	Target	MSC23		18.09	18.09
F:\OpenArray\Cycling Data\OA-20 (Mesenchymal Stem Cells) Cycling Data Summary.csv	D5c8	hsa-miR-331	Target	MSC16		17.347	17.347
F:\OpenArray\Cycling Data\OA-20 (Mesenchymal Stem Cells) Cycling Data Summary.csv	C2b5	hsa-miR-489	Target	MSC24		26.533	26.533
F:\OpenArray\Cycling Data\OA-20 (Mesenchymal Stem Cells) Cycling Data Summary.csv	B2a4	hsa-miR-197	Target	MSC18		17.167	17.167
F:\OpenArray\Cycling Data\OA-20 (Mesenchymal Stem Cells) Cycling Data Summary.csv	D1c8	hsa-miR-331	Target	MSC15		16.624	16.624
F:\OpenArray\Cycling Data\OA-20 (Mesenchymal Stem Cells) Cycling Data Summary.csv	C6b5	hsa-miR-489	Target	MSC25		26.087	26.087
F:\OpenArray\Cycling Data\OA-20 (Mesenchymal Stem Cells) Cycling Data Summary.csv	B2a4	hsa-miR-197	Target	MSC15		17.982	17.982
F:\OpenArray\Cycling Data\OA-20 (Mesenchymal Stem Cells) Cycling Data Summary.csv	D9c8	hsa-miR-331	Target	MSC14		18.828	18.828
F:\OpenArray\Cycling Data\OA-20 (Mesenchymal Stem Cells) Cycling Data Summary.csv	C10b5	hsa-miR-489	Target	MSC26		28.155	28.155
F:\OpenArray\Cycling Data\OA-20 (Mesenchymal Stem Cells) Cycling Data Summary.csv	B6a4	hsa-miR-197	Target	MSC16		19.007	19.007
F:\OpenArray\Cycling Data\OA-20 (Mesenchymal Stem Cells) Cycling Data Summary.csv	D5c8	hsa-miR-331	Target	MSC13		17.858	17.858
F:\OpenArray\Cycling Data\OA-20 (Mesenchymal Stem Cells) Cycling Data Summary.csv	C2b5	hsa-miR-489	Target	MSC27		24.827	24.827
F:\OpenArray\Cycling Data\OA-20 (Mesenchymal Stem Cells) Cycling Data Summary.csv	D1c8	hsa-miR-331	Target	MSC12		19.23	19.23
F:\OpenArray\Cycling Data\OA-20 (Mesenchymal Stem Cells) Cycling Data Summary.csv	C6b5	hsa-miR-489	Target	MSC28		24.132	24.132
F:\OpenArray\Cycling Data\OA-20 (Mesenchymal Stem Cells) Cycling Data Summary.csv	C10b5	hsa-miR-489	Target	MSC29		25.774	25.774
F:\OpenArray\Cycling Data\OA-20 (Mesenchymal Stem Cells) Cycling Data Summary.csv	D9c8	hsa-miR-331	Target	MSC11		18.086	18.086
F:\OpenArray\Cycling Data\OA-20 (Mesenchymal Stem Cells) Cycling Data Summary.csv	B6a4	hsa-miR-197	Target	MSC19		19.019	19.019
F:\OpenArray\Cycling Data\OA-20 (Mesenchymal Stem Cells) Cycling Data Summary.csv	D5c8	hsa-miR-331	Target	MSC10		18.026	18.026
F:\OpenArray\Cycling Data\OA-20 (Mesenchymal Stem Cells) Cycling Data Summary.csv	C10b5	hsa-miR-489	Target	MSC20		21.36	21.36
F:\OpenArray\Cycling Data\OA-20 (Mesenchymal Stem Cells) Cycling Data Summary.csv	C2b5	hsa-miR-489	Target	MSC21		26.385	26.385
F:\OpenArray\Cycling Data\OA-20 (Mesenchymal Stem Cells) Cycling Data Summary.csv	C6b5	hsa-miR-489	Target	MSC22		27.051	27.051
F:\OpenArray\Cycling Data\OA-20 (Mesenchymal Stem Cells) Cycling Data Summary.csv	C10b5	hsa-miR-489	Target	MSC23		26.694	26.694
F:\OpenArray\Cycling Data\OA-20 (Mesenchymal Stem Cells) Cycling Data Summary.csv	A1f2	hsa-miR-150	Target	MSC24		22.568	22.568
F:\OpenArray\Cycling Data\OA-20 (Mesenchymal Stem Cells) Cycling Data Summary.csv	A9f2	hsa-miR-150	Target	MSC23		24.261	24.261
F:\OpenArray\Cycling Data\OA-20 (Mesenchymal Stem Cells) Cycling Data Summary.csv	A9f2	hsa-miR-150	Target	MSC26		28.179	28.179
F:\OpenArray\Cycling Data\OA-20 (Mesenchymal Stem Cells) Cycling Data Summary.csv	A5f2	hsa-miR-150	Target	MSC25		23.792	23.792
F:\OpenArray\Cycling Data\OA-20 (Mesenchymal Stem Cells) Cycling Data Summary.csv	A5f2	hsa-miR-150	Target	MSC28		24.421	24.421
F:\OpenArray\Cycling Data\OA-20 (Mesenchymal Stem Cells) Cycling Data Summary.csv	A1f2	hsa-miR-150	Target	MSC27		24.328	24.328
F:\OpenArray\Cycling Data\OA-20 (Mesenchymal Stem Cells) Cycling Data Summary.csv	D5b6	hsa-miR-199a-3p	Target	MSC19		15.555	15.555
F:\OpenArray\Cycling Data\OA-20 (Mesenchymal Stem Cells) Cycling Data Summary.csv	A9f2	hsa-miR-150	Target	MSC29		24.883	24.883
F:\OpenArray\Cycling Data\OA-20 (Mesenchymal Stem Cells) Cycling Data Summary.csv	D1b6	hsa-miR-199a-3p	Target	MSC18		18.474	18.474
F:\OpenArray\Cycling Data\OA-20 (Mesenchymal Stem Cells) Cycling Data Summary.csv	D9b6	hsa-miR-199a-3p	Target	MSC17		14.815	14.815
F:\OpenArray\Cycling Data\OA-20 (Mesenchymal Stem Cells) Cycling Data Summary.csv	B2a4	hsa-miR-197	Target	MSC21		17.416	17.416
F:\OpenArray\Cycling Data\OA-20 (Mesenchymal Stem Cells) Cycling Data Summary.csv	D5b6	hsa-miR-199a-3p	Target	MSC16		14.893	14.893
F:\OpenArray\Cycling Data\OA-20 (Mesenchymal Stem Cells) Cycling Data Summary.csv	B10a4	hsa-miR-197	Target	MSC20		19.587	19.587
F:\OpenArray\Cycling Data\OA-20 (Mesenchymal Stem Cells) Cycling Data Summary.csv	D1b6	hsa-miR-199a-3p	Target	MSC15		14.616	14.616
F:\OpenArray\Cycling Data\OA-20 (Mesenchymal Stem Cells) Cycling Data Summary.csv	D9b6	hsa-miR-199a-3p	Target	MSC14		16.021	16.021
F:\OpenArray\Cycling Data\OA-20 (Mesenchymal Stem Cells) Cycling Data Summary.csv	D5b6	hsa-miR-199a-3p	Target	MSC13		16.095	16.095
F:\OpenArray\Cycling Data\OA-20 (Mesenchymal Stem Cells) Cycling Data Summary.csv	B6a4	hsa-miR-197	Target	MSC25		19.195	19.195
F:\OpenArray\Cycling Data\OA-20 (Mesenchymal Stem Cells) Cycling Data Summary.csv	D1b6	hsa-miR-199a-3p	Target	MSC12		17.038	17.038
F:\OpenArray\Cycling Data\OA-20 (Mesenchymal Stem Cells) Cycling Data Summary.csv	B2a4	hsa-miR-197	Target	MSC24		17.116	17.116
F:\OpenArray\Cycling Data\OA-20 (Mesenchymal Stem Cells) Cycling Data Summary.csv	D9b6	hsa-miR-199a-3p	Target	MSC11		15.311	15.311
F:\OpenArray\Cycling Data\OA-20 (Mesenchymal Stem Cells) Cycling Data Summary.csv	B10a4	hsa-miR-197	Target	MSC23		19.582	19.582
F:\OpenArray\Cycling Data\OA-20 (Mesenchymal Stem Cells) Cycling Data Summary.csv	D5b6	hsa-miR-199a-3p	Target	MSC10		15.703	15.703
F:\OpenArray\Cycling Data\OA-20 (Mesenchymal Stem Cells) Cycling Data Summary.csv	A1f2	hsa-miR-150	Target	MSC21		24.518	24.518
F:\OpenArray\Cycling Data\OA-20 (Mesenchymal Stem Cells) Cycling Data Summary.csv	B6b5	hsa-miR-369-3p	Target	MSC28		25.852	25.852
F:\OpenArray\Cycling Data\OA-20 (Mesenchymal Stem Cells) Cycling Data Summary.csv	A5f2	hsa-miR-150	Target	MSC22		25.805	25.805
F:\OpenArray\Cycling Data\OA-20 (Mesenchymal Stem Cells) Cycling Data Summary.csv	B2b5	hsa-miR-369-3p	Target	MSC27		27.128	27.128
F:\OpenArray\Cycling Data\OA-20 (Mesenchymal Stem Cells) Cycling Data Summary.csv	B10b5	hsa-miR-369-3p	Target	MSC29		25.667	25.667
F:\OpenArray\Cycling Data\OA-20 (Mesenchymal Stem Cells) Cycling Data Summary.csv	A9f2	hsa-miR-150	Target	MSC20		27.419	27.419
F:\OpenArray\Cycling Data\OA-20 (Mesenchymal Stem Cells) Cycling Data Summary.csv	C10c7	hsa-miR-215	Target	MSC2		26.729	26.729
F:\OpenArray\Cycling Data\OA-20 (Mesenchymal Stem Cells) Cycling Data Summary.csv	A5f2	hsa-miR-150	Target	MSC19		25.906	25.906
F:\OpenArray\Cycling Data\OA-20 (Mesenchymal Stem Cells) Cycling Data Summary.csv	A1f2	hsa-miR-150	Target	MSC18		25.081	25.081
F:\OpenArray\Cycling Data\OA-20 (Mesenchymal Stem Cells) Cycling Data Summary.csv	A9f2	hsa-miR-150	Target	MSC17		27.184	27.184
F:\OpenArray\Cycling Data\OA-20 (Mesenchymal Stem Cells) Cycling Data Summary.csv	A5f2	hsa-miR-150	Target	MSC16		27.787	27.787
F:\OpenArray\Cycling Data\OA-20 (Mesenchymal Stem Cells) Cycling Data Summary.csv	A1f2	hsa-miR-150	Target	MSC15		24.147	24.147
F:\OpenArray\Cycling Data\OA-20 (Mesenchymal Stem Cells) Cycling Data Summary.csv	A9f2	hsa-miR-150	Target	MSC14		29.555	29.555
F:\OpenArray\Cycling Data\OA-20 (Mesenchymal Stem Cells) Cycling Data Summary.csv	A5f2	hsa-miR-150	Target	MSC13		30.848	30
F:\OpenArray\Cycling Data\OA-20 (Mesenchymal Stem Cells) Cycling Data Summary.csv	A1f2	hsa-miR-150	Target	MSC12		29.917	29.917
F:\OpenArray\Cycling Data\OA-20 (Mesenchymal Stem Cells) Cycling Data Summary.csv	A4c8	hsa-miR-34a#	Target	MSC9		22.144	22.144
F:\OpenArray\Cycling Data\OA-20 (Mesenchymal Stem Cells) Cycling Data Summary.csv	A12c8	hsa-miR-34a#	Target	MSC8		20.309	20.309
F:\OpenArray\Cycling Data\OA-20 (Mesenchymal Stem Cells) Cycling Data Summary.csv	A8c8	hsa-miR-34a#	Target	MSC7		19.725	19.725
F:\OpenArray\Cycling Data\OA-20 (Mesenchymal Stem Cells) Cycling Data Summary.csv	A4c8	hsa-miR-34a#	Target	MSC6		21.617	21.617
F:\OpenArray\Cycling Data\OA-20 (Mesenchymal Stem Cells) Cycling Data Summary.csv	A8c8	hsa-miR-34a#	Target	MSC4		20.363	20.363
F:\OpenArray\Cycling Data\OA-20 (Mesenchymal Stem Cells) Cycling Data Summary.csv	C3a8	hsa-miR-425#	Target	MSC3		27.041	27.041
F:\OpenArray\Cycling Data\OA-20 (Mesenchymal Stem Cells) Cycling Data Summary.csv	A4c8	hsa-miR-34a#	Target	MSC3		19.69	19.69
F:\OpenArray\Cycling Data\OA-20 (Mesenchymal Stem Cells) Cycling Data Summary.csv	B6b5	hsa-miR-369-3p	Target	MSC19		26.537	26.537
F:\OpenArray\Cycling Data\OA-20 (Mesenchymal Stem Cells) Cycling Data Summary.csv	C7a8	hsa-miR-425#	Target	MSC4		25.195	25.195
F:\OpenArray\Cycling Data\OA-20 (Mesenchymal Stem Cells) Cycling Data Summary.csv	A12c8	hsa-miR-34a#	Target	MSC2		20.548	20.548
F:\OpenArray\Cycling Data\OA-20 (Mesenchymal Stem Cells) Cycling Data Summary.csv	C11a8	hsa-miR-425#	Target	MSC5		26.61	26.61
F:\OpenArray\Cycling Data\OA-20 (Mesenchymal Stem Cells) Cycling Data Summary.csv	A5f2	hsa-miR-150	Target	MSC10		25.186	25.186
F:\OpenArray\Cycling Data\OA-20 (Mesenchymal Stem Cells) Cycling Data Summary.csv	C3a8	hsa-miR-425#	Target	MSC6		25.575	25.575
F:\OpenArray\Cycling Data\OA-20 (Mesenchymal Stem Cells) Cycling Data Summary.csv	A9f2	hsa-miR-150	Target	MSC11		25.518	25.518
F:\OpenArray\Cycling Data\OA-20 (Mesenchymal Stem Cells) Cycling Data Summary.csv	C7a8	hsa-miR-425#	Target	MSC7		23.796	23.796
F:\OpenArray\Cycling Data\OA-20 (Mesenchymal Stem Cells) Cycling Data Summary.csv	C11a8	hsa-miR-425#	Target	MSC8		24.918	24.918
F:\OpenArray\Cycling Data\OA-20 (Mesenchymal Stem Cells) Cycling Data Summary.csv	C3a8	hsa-miR-425#	Target	MSC9		27.697	27.697
F:\OpenArray\Cycling Data\OA-20 (Mesenchymal Stem Cells) Cycling Data Summary.csv	B2b5	hsa-miR-369-3p	Target	MSC21		27.454	27.454
F:\OpenArray\Cycling Data\OA-20 (Mesenchymal Stem Cells) Cycling Data Summary.csv	C7d5	HSA-MIR-1248	Target	MSC4		28.257	28.257
F:\OpenArray\Cycling Data\OA-20 (Mesenchymal Stem Cells) Cycling Data Summary.csv	B6b5	hsa-miR-369-3p	Target	MSC22		25.32	25.32
F:\OpenArray\Cycling Data\OA-20 (Mesenchymal Stem Cells) Cycling Data Summary.csv	C3d5	HSA-MIR-1248	Target	MSC3		29.811	29.811
F:\OpenArray\Cycling Data\OA-20 (Mesenchymal Stem Cells) Cycling Data Summary.csv	C11d5	HSA-MIR-1248	Target	MSC2		28.37	28.37
F:\OpenArray\Cycling Data\OA-20 (Mesenchymal Stem Cells) Cycling Data Summary.csv	B10b5	hsa-miR-369-3p	Target	MSC20		26.062	26.062
F:\OpenArray\Cycling Data\OA-20 (Mesenchymal Stem Cells) Cycling Data Summary.csv	B6b5	hsa-miR-369-3p	Target	MSC25		27.007	27.007
F:\OpenArray\Cycling Data\OA-20 (Mesenchymal Stem Cells) Cycling Data Summary.csv	B10b5	hsa-miR-369-3p	Target	MSC26		29.505	29.505
F:\OpenArray\Cycling Data\OA-20 (Mesenchymal Stem Cells) Cycling Data Summary.csv	C11a8	hsa-miR-425#	Target	MSC2		25.616	25.616
F:\OpenArray\Cycling Data\OA-20 (Mesenchymal Stem Cells) Cycling Data Summary.csv	C3d5	HSA-MIR-1248	Target	MSC6		26.157	26.157
F:\OpenArray\Cycling Data\OA-20 (Mesenchymal Stem Cells) Cycling Data Summary.csv	C7a8	hsa-miR-425#	Target	MSC1		29.823	29.823
F:\OpenArray\Cycling Data\OA-20 (Mesenchymal Stem Cells) Cycling Data Summary.csv	C6d3	hsa-miR-106b	Target	MSC7		18.906	18.906
F:\OpenArray\Cycling Data\OA-20 (Mesenchymal Stem Cells) Cycling Data Summary.csv	C2d3	hsa-miR-106b	Target	MSC6		18.707	18.707
F:\OpenArray\Cycling Data\OA-20 (Mesenchymal Stem Cells) Cycling Data Summary.csv	C10d3	hsa-miR-106b	Target	MSC5		25.159	25.159
F:\OpenArray\Cycling Data\OA-20 (Mesenchymal Stem Cells) Cycling Data Summary.csv	C6d3	hsa-miR-106b	Target	MSC4		18.772	18.772
F:\OpenArray\Cycling Data\OA-20 (Mesenchymal Stem Cells) Cycling Data Summary.csv	C2d3	hsa-miR-106b	Target	MSC9		20.39	20.39
F:\OpenArray\Cycling Data\OA-20 (Mesenchymal Stem Cells) Cycling Data Summary.csv	C10d3	hsa-miR-106b	Target	MSC8		20.349	20.349
F:\OpenArray\Cycling Data\OA-20 (Mesenchymal Stem Cells) Cycling Data Summary.csv	C10d3	hsa-miR-106b	Target	MSC2		19.856	19.856
F:\OpenArray\Cycling Data\OA-20 (Mesenchymal Stem Cells) Cycling Data Summary.csv	C2d3	hsa-miR-106b	Target	MSC3		17.766	17.766
F:\OpenArray\Cycling Data\OA-20 (Mesenchymal Stem Cells) Cycling Data Summary.csv	D9c8	hsa-miR-331	Target	MSC20		17.857	17.857
F:\OpenArray\Cycling Data\OA-20 (Mesenchymal Stem Cells) Cycling Data Summary.csv	D1c8	hsa-miR-331	Target	MSC21		15.495	15.495
F:\OpenArray\Cycling Data\OA-20 (Mesenchymal Stem Cells) Cycling Data Summary.csv	D5c8	hsa-miR-331	Target	MSC22		16.322	16.322
F:\OpenArray\Cycling Data\OA-20 (Mesenchymal Stem Cells) Cycling Data Summary.csv	D9c8	hsa-miR-331	Target	MSC23		19.366	19.366
F:\OpenArray\Cycling Data\OA-20 (Mesenchymal Stem Cells) Cycling Data Summary.csv	D1c8	hsa-miR-331	Target	MSC24		16.233	16.233
F:\OpenArray\Cycling Data\OA-20 (Mesenchymal Stem Cells) Cycling Data Summary.csv	D5c8	hsa-miR-331	Target	MSC25		16.511	16.511
F:\OpenArray\Cycling Data\OA-20 (Mesenchymal Stem Cells) Cycling Data Summary.csv	D9c8	hsa-miR-331	Target	MSC26		19.602	19.602
F:\OpenArray\Cycling Data\OA-20 (Mesenchymal Stem Cells) Cycling Data Summary.csv	D1c8	hsa-miR-331	Target	MSC27		16.135	16.135
F:\OpenArray\Cycling Data\OA-20 (Mesenchymal Stem Cells) Cycling Data Summary.csv	B9g4	hsa-miR-324-3p	Target	MSC5		25.133	25.133
F:\OpenArray\Cycling Data\OA-20 (Mesenchymal Stem Cells) Cycling Data Summary.csv	D1c8	hsa-miR-331	Target	MSC18		18.646	18.646
F:\OpenArray\Cycling Data\OA-20 (Mesenchymal Stem Cells) Cycling Data Summary.csv	B5g4	hsa-miR-324-3p	Target	MSC4		20.443	20.443
F:\OpenArray\Cycling Data\OA-20 (Mesenchymal Stem Cells) Cycling Data Summary.csv	D9c8	hsa-miR-331	Target	MSC17		18.035	18.035
F:\OpenArray\Cycling Data\OA-20 (Mesenchymal Stem Cells) Cycling Data Summary.csv	B1g4	hsa-miR-324-3p	Target	MSC3		19.74	19.74
F:\OpenArray\Cycling Data\OA-20 (Mesenchymal Stem Cells) Cycling Data Summary.csv	D5c8	hsa-miR-331	Target	MSC19		17.851	17.851
F:\OpenArray\Cycling Data\OA-20 (Mesenchymal Stem Cells) Cycling Data Summary.csv	B9g4	hsa-miR-324-3p	Target	MSC2		21.551	21.551
F:\OpenArray\Cycling Data\OA-20 (Mesenchymal Stem Cells) Cycling Data Summary.csv	B1g4	hsa-miR-324-3p	Target	MSC9		20.772	20.772
F:\OpenArray\Cycling Data\OA-20 (Mesenchymal Stem Cells) Cycling Data Summary.csv	B9g4	hsa-miR-324-3p	Target	MSC8		20.582	20.582
F:\OpenArray\Cycling Data\OA-20 (Mesenchymal Stem Cells) Cycling Data Summary.csv	B5g4	hsa-miR-324-3p	Target	MSC7		20.519	20.519
F:\OpenArray\Cycling Data\OA-20 (Mesenchymal Stem Cells) Cycling Data Summary.csv	B1g4	hsa-miR-324-3p	Target	MSC6		20.256	20.256
F:\OpenArray\Cycling Data\OA-20 (Mesenchymal Stem Cells) Cycling Data Summary.csv	A8a5	hsa-miR-221#	Target	MSC7		26.77	26.77
F:\OpenArray\Cycling Data\OA-20 (Mesenchymal Stem Cells) Cycling Data Summary.csv	C12e6	hsa-miR-766	Target	MSC8		22.996	22.996
F:\OpenArray\Cycling Data\OA-20 (Mesenchymal Stem Cells) Cycling Data Summary.csv	A4a5	hsa-miR-221#	Target	MSC6		28.217	28.217
F:\OpenArray\Cycling Data\OA-20 (Mesenchymal Stem Cells) Cycling Data Summary.csv	D9c8	hsa-miR-331	Target	MSC29		15.208	15.208
F:\OpenArray\Cycling Data\OA-20 (Mesenchymal Stem Cells) Cycling Data Summary.csv	C4e6	hsa-miR-766	Target	MSC9		23.189	23.189
F:\OpenArray\Cycling Data\OA-20 (Mesenchymal Stem Cells) Cycling Data Summary.csv	D5c8	hsa-miR-331	Target	MSC28		16.139	16.139
F:\OpenArray\Cycling Data\OA-20 (Mesenchymal Stem Cells) Cycling Data Summary.csv	C4e6	hsa-miR-766	Target	MSC6		23.972	23.972
F:\OpenArray\Cycling Data\OA-20 (Mesenchymal Stem Cells) Cycling Data Summary.csv	C8e6	hsa-miR-766	Target	MSC7		21.773	21.773
F:\OpenArray\Cycling Data\OA-20 (Mesenchymal Stem Cells) Cycling Data Summary.csv	C8e6	hsa-miR-766	Target	MSC4		21.155	21.155
F:\OpenArray\Cycling Data\OA-20 (Mesenchymal Stem Cells) Cycling Data Summary.csv	C12e6	hsa-miR-766	Target	MSC5		24.429	24.429
F:\OpenArray\Cycling Data\OA-20 (Mesenchymal Stem Cells) Cycling Data Summary.csv	A8a5	hsa-miR-221#	Target	MSC4		28.264	28.264
F:\OpenArray\Cycling Data\OA-20 (Mesenchymal Stem Cells) Cycling Data Summary.csv	A4a5	hsa-miR-221#	Target	MSC3		27.725	27.725
F:\OpenArray\Cycling Data\OA-20 (Mesenchymal Stem Cells) Cycling Data Summary.csv	A12a5	hsa-miR-221#	Target	MSC2		29.481	29.481
F:\OpenArray\Cycling Data\OA-20 (Mesenchymal Stem Cells) Cycling Data Summary.csv	A2e3	hsa-miR-99a	Target	MSC18		14.282	14.282
F:\OpenArray\Cycling Data\OA-20 (Mesenchymal Stem Cells) Cycling Data Summary.csv	A10e3	hsa-miR-99a	Target	MSC17		12.871	12.871
F:\OpenArray\Cycling Data\OA-20 (Mesenchymal Stem Cells) Cycling Data Summary.csv	A6e3	hsa-miR-99a	Target	MSC19		12.557	12.557
F:\OpenArray\Cycling Data\OA-20 (Mesenchymal Stem Cells) Cycling Data Summary.csv	C12e6	hsa-miR-766	Target	MSC2		21.987	21.987
F:\OpenArray\Cycling Data\OA-20 (Mesenchymal Stem Cells) Cycling Data Summary.csv	C4e6	hsa-miR-766	Target	MSC3		21.51	21.51
F:\OpenArray\Cycling Data\OA-20 (Mesenchymal Stem Cells) Cycling Data Summary.csv	A6e3	hsa-miR-99a	Target	MSC13		12.665	12.665
F:\OpenArray\Cycling Data\OA-20 (Mesenchymal Stem Cells) Cycling Data Summary.csv	A10e3	hsa-miR-99a	Target	MSC14		13.15	13.15
F:\OpenArray\Cycling Data\OA-20 (Mesenchymal Stem Cells) Cycling Data Summary.csv	A2e3	hsa-miR-99a	Target	MSC15		12.141	12.141
F:\OpenArray\Cycling Data\OA-20 (Mesenchymal Stem Cells) Cycling Data Summary.csv	A6e3	hsa-miR-99a	Target	MSC16		12.762	12.762
F:\OpenArray\Cycling Data\OA-20 (Mesenchymal Stem Cells) Cycling Data Summary.csv	A6e3	hsa-miR-99a	Target	MSC10		13.303	13.303
F:\OpenArray\Cycling Data\OA-20 (Mesenchymal Stem Cells) Cycling Data Summary.csv	A10e3	hsa-miR-99a	Target	MSC11		13.174	13.174
F:\OpenArray\Cycling Data\OA-20 (Mesenchymal Stem Cells) Cycling Data Summary.csv	A2e3	hsa-miR-99a	Target	MSC12		13.521	13.521
F:\OpenArray\Cycling Data\OA-20 (Mesenchymal Stem Cells) Cycling Data Summary.csv	C6a6	hsa-miR-107	Target	MSC10		24.397	24.397
F:\OpenArray\Cycling Data\OA-20 (Mesenchymal Stem Cells) Cycling Data Summary.csv	C10a6	hsa-miR-107	Target	MSC11		24.085	24.085
F:\OpenArray\Cycling Data\OA-20 (Mesenchymal Stem Cells) Cycling Data Summary.csv	C10a6	hsa-miR-107	Target	MSC14		23.542	23.542
F:\OpenArray\Cycling Data\OA-20 (Mesenchymal Stem Cells) Cycling Data Summary.csv	C2a6	hsa-miR-107	Target	MSC15		23.003	23.003
F:\OpenArray\Cycling Data\OA-20 (Mesenchymal Stem Cells) Cycling Data Summary.csv	A10e3	hsa-miR-99a	Target	MSC29		10.903	10.903
F:\OpenArray\Cycling Data\OA-20 (Mesenchymal Stem Cells) Cycling Data Summary.csv	A12c2	hsa-miR-26b#	Target	MSC29		26.159	26.159
F:\OpenArray\Cycling Data\OA-20 (Mesenchymal Stem Cells) Cycling Data Summary.csv	C2a6	hsa-miR-107	Target	MSC12		23.945	23.945
F:\OpenArray\Cycling Data\OA-20 (Mesenchymal Stem Cells) Cycling Data Summary.csv	C6a6	hsa-miR-107	Target	MSC13		22.932	22.932
F:\OpenArray\Cycling Data\OA-20 (Mesenchymal Stem Cells) Cycling Data Summary.csv	A8c2	hsa-miR-26b#	Target	MSC28		26.425	26.425
F:\OpenArray\Cycling Data\OA-20 (Mesenchymal Stem Cells) Cycling Data Summary.csv	A6e3	hsa-miR-99a	Target	MSC28		11.723	11.723
F:\OpenArray\Cycling Data\OA-20 (Mesenchymal Stem Cells) Cycling Data Summary.csv	C2a6	hsa-miR-107	Target	MSC18		25.065	25.065
F:\OpenArray\Cycling Data\OA-20 (Mesenchymal Stem Cells) Cycling Data Summary.csv	C6a6	hsa-miR-107	Target	MSC19		23.491	23.491
F:\OpenArray\Cycling Data\OA-20 (Mesenchymal Stem Cells) Cycling Data Summary.csv	C6a6	hsa-miR-107	Target	MSC16		22.354	22.354
F:\OpenArray\Cycling Data\OA-20 (Mesenchymal Stem Cells) Cycling Data Summary.csv	C10a6	hsa-miR-107	Target	MSC17		22.077	22.077
F:\OpenArray\Cycling Data\OA-20 (Mesenchymal Stem Cells) Cycling Data Summary.csv	B4c5	hsa-miR-181c#	Target	MSC21		23.404	23.404
F:\OpenArray\Cycling Data\OA-20 (Mesenchymal Stem Cells) Cycling Data Summary.csv	A12c2	hsa-miR-26b#	Target	MSC26		30.627	30
F:\OpenArray\Cycling Data\OA-20 (Mesenchymal Stem Cells) Cycling Data Summary.csv	A10e3	hsa-miR-99a	Target	MSC26		15.202	15.202
F:\OpenArray\Cycling Data\OA-20 (Mesenchymal Stem Cells) Cycling Data Summary.csv	A4c2	hsa-miR-26b#	Target	MSC27		29.147	29.147
F:\OpenArray\Cycling Data\OA-20 (Mesenchymal Stem Cells) Cycling Data Summary.csv	A2e3	hsa-miR-99a	Target	MSC27		12.042	12.042
F:\OpenArray\Cycling Data\OA-20 (Mesenchymal Stem Cells) Cycling Data Summary.csv	A4c2	hsa-miR-26b#	Target	MSC24		27.588	27.588
F:\OpenArray\Cycling Data\OA-20 (Mesenchymal Stem Cells) Cycling Data Summary.csv	A2e3	hsa-miR-99a	Target	MSC24		12.303	12.303
F:\OpenArray\Cycling Data\OA-20 (Mesenchymal Stem Cells) Cycling Data Summary.csv	A8c2	hsa-miR-26b#	Target	MSC25		28.552	28.552
F:\OpenArray\Cycling Data\OA-20 (Mesenchymal Stem Cells) Cycling Data Summary.csv	A6e3	hsa-miR-99a	Target	MSC25		12.458	12.458
F:\OpenArray\Cycling Data\OA-20 (Mesenchymal Stem Cells) Cycling Data Summary.csv	A8c2	hsa-miR-26b#	Target	MSC22		27.211	27.211
F:\OpenArray\Cycling Data\OA-20 (Mesenchymal Stem Cells) Cycling Data Summary.csv	A6e3	hsa-miR-99a	Target	MSC22		12.128	12.128
F:\OpenArray\Cycling Data\OA-20 (Mesenchymal Stem Cells) Cycling Data Summary.csv	A10e3	hsa-miR-99a	Target	MSC23		14.311	14.311
F:\OpenArray\Cycling Data\OA-20 (Mesenchymal Stem Cells) Cycling Data Summary.csv	A12c2	hsa-miR-26b#	Target	MSC20		29.651	29.651
F:\OpenArray\Cycling Data\OA-20 (Mesenchymal Stem Cells) Cycling Data Summary.csv	A10e3	hsa-miR-99a	Target	MSC20		12.722	12.722
F:\OpenArray\Cycling Data\OA-20 (Mesenchymal Stem Cells) Cycling Data Summary.csv	A4c2	hsa-miR-26b#	Target	MSC21		27.653	27.653
F:\OpenArray\Cycling Data\OA-20 (Mesenchymal Stem Cells) Cycling Data Summary.csv	A2e3	hsa-miR-99a	Target	MSC21		12.354	12.354
F:\OpenArray\Cycling Data\OA-20 (Mesenchymal Stem Cells) Cycling Data Summary.csv	C10a6	hsa-miR-107	Target	MSC23		26.287	26.287
F:\OpenArray\Cycling Data\OA-20 (Mesenchymal Stem Cells) Cycling Data Summary.csv	D2e4	hsa-miR-545	Target	MSC18		32.542	30
F:\OpenArray\Cycling Data\OA-20 (Mesenchymal Stem Cells) Cycling Data Summary.csv	C2a6	hsa-miR-107	Target	MSC24		24.46	24.46
F:\OpenArray\Cycling Data\OA-20 (Mesenchymal Stem Cells) Cycling Data Summary.csv	C6a6	hsa-miR-107	Target	MSC25		23.532	23.532
F:\OpenArray\Cycling Data\OA-20 (Mesenchymal Stem Cells) Cycling Data Summary.csv	A2e4	hsa-miR-99b	Target	MSC9		16.412	16.412
F:\OpenArray\Cycling Data\OA-20 (Mesenchymal Stem Cells) Cycling Data Summary.csv	C10a6	hsa-miR-107	Target	MSC20		23.565	23.565
F:\OpenArray\Cycling Data\OA-20 (Mesenchymal Stem Cells) Cycling Data Summary.csv	C2a6	hsa-miR-107	Target	MSC21		22.857	22.857
F:\OpenArray\Cycling Data\OA-20 (Mesenchymal Stem Cells) Cycling Data Summary.csv	D6e4	hsa-miR-545	Target	MSC16		30.693	30
F:\OpenArray\Cycling Data\OA-20 (Mesenchymal Stem Cells) Cycling Data Summary.csv	C6a6	hsa-miR-107	Target	MSC22		22.963	22.963
F:\OpenArray\Cycling Data\OA-20 (Mesenchymal Stem Cells) Cycling Data Summary.csv	C2a4	hsa-miR-28-3p	Target	MSC9		18.606	18.606
F:\OpenArray\Cycling Data\OA-20 (Mesenchymal Stem Cells) Cycling Data Summary.csv	C10a4	hsa-miR-28-3p	Target	MSC8		17.953	17.953
F:\OpenArray\Cycling Data\OA-20 (Mesenchymal Stem Cells) Cycling Data Summary.csv	C6a4	hsa-miR-28-3p	Target	MSC7		17.902	17.902
F:\OpenArray\Cycling Data\OA-20 (Mesenchymal Stem Cells) Cycling Data Summary.csv	C2a6	hsa-miR-107	Target	MSC27		22.8	22.8
F:\OpenArray\Cycling Data\OA-20 (Mesenchymal Stem Cells) Cycling Data Summary.csv	C6a6	hsa-miR-107	Target	MSC28		22.069	22.069
F:\OpenArray\Cycling Data\OA-20 (Mesenchymal Stem Cells) Cycling Data Summary.csv	C10a6	hsa-miR-107	Target	MSC29		22.047	22.047
F:\OpenArray\Cycling Data\OA-20 (Mesenchymal Stem Cells) Cycling Data Summary.csv	C6a4	hsa-miR-28-3p	Target	MSC1		27.611	27.611
F:\OpenArray\Cycling Data\OA-20 (Mesenchymal Stem Cells) Cycling Data Summary.csv	C10a4	hsa-miR-28-3p	Target	MSC2		18.588	18.588
F:\OpenArray\Cycling Data\OA-20 (Mesenchymal Stem Cells) Cycling Data Summary.csv	C10a4	hsa-miR-28-3p	Target	MSC5		23.522	23.522
F:\OpenArray\Cycling Data\OA-20 (Mesenchymal Stem Cells) Cycling Data Summary.csv	C2a4	hsa-miR-28-3p	Target	MSC6		18.92	18.92
F:\OpenArray\Cycling Data\OA-20 (Mesenchymal Stem Cells) Cycling Data Summary.csv	C2a4	hsa-miR-28-3p	Target	MSC3		17.572	17.572
F:\OpenArray\Cycling Data\OA-20 (Mesenchymal Stem Cells) Cycling Data Summary.csv	C6a4	hsa-miR-28-3p	Target	MSC4		18.549	18.549
F:\OpenArray\Cycling Data\OA-20 (Mesenchymal Stem Cells) Cycling Data Summary.csv	A2e4	hsa-miR-99b	Target	MSC6		16.943	16.943
F:\OpenArray\Cycling Data\OA-20 (Mesenchymal Stem Cells) Cycling Data Summary.csv	A10e4	hsa-miR-99b	Target	MSC5		23.63	23.63
F:\OpenArray\Cycling Data\OA-20 (Mesenchymal Stem Cells) Cycling Data Summary.csv	A10e4	hsa-miR-99b	Target	MSC8		18.366	18.366
F:\OpenArray\Cycling Data\OA-20 (Mesenchymal Stem Cells) Cycling Data Summary.csv	A6e4	hsa-miR-99b	Target	MSC7		16.538	16.538
F:\OpenArray\Cycling Data\OA-20 (Mesenchymal Stem Cells) Cycling Data Summary.csv	A10e4	hsa-miR-99b	Target	MSC2		18.016	18.016
F:\OpenArray\Cycling Data\OA-20 (Mesenchymal Stem Cells) Cycling Data Summary.csv	A6e4	hsa-miR-99b	Target	MSC4		17.441	17.441
F:\OpenArray\Cycling Data\OA-20 (Mesenchymal Stem Cells) Cycling Data Summary.csv	A2e4	hsa-miR-99b	Target	MSC3		17.202	17.202
F:\OpenArray\Cycling Data\OA-20 (Mesenchymal Stem Cells) Cycling Data Summary.csv	C7b8	hsa-miR-30d	Target	MSC19		26.298	26.298
F:\OpenArray\Cycling Data\OA-20 (Mesenchymal Stem Cells) Cycling Data Summary.csv	C3b8	hsa-miR-30d	Target	MSC15		22.134	22.134
F:\OpenArray\Cycling Data\OA-20 (Mesenchymal Stem Cells) Cycling Data Summary.csv	C7b8	hsa-miR-30d	Target	MSC16		22.035	22.035
F:\OpenArray\Cycling Data\OA-20 (Mesenchymal Stem Cells) Cycling Data Summary.csv	C11b8	hsa-miR-30d	Target	MSC17		21.3	21.3
F:\OpenArray\Cycling Data\OA-20 (Mesenchymal Stem Cells) Cycling Data Summary.csv	C3b8	hsa-miR-30d	Target	MSC18		29.637	29.637
F:\OpenArray\Cycling Data\OA-20 (Mesenchymal Stem Cells) Cycling Data Summary.csv	C11b8	hsa-miR-30d	Target	MSC11		22.098	22.098
F:\OpenArray\Cycling Data\OA-20 (Mesenchymal Stem Cells) Cycling Data Summary.csv	C3b8	hsa-miR-30d	Target	MSC12		24.316	24.316
F:\OpenArray\Cycling Data\OA-20 (Mesenchymal Stem Cells) Cycling Data Summary.csv	C7b8	hsa-miR-30d	Target	MSC13		23.203	23.203
F:\OpenArray\Cycling Data\OA-20 (Mesenchymal Stem Cells) Cycling Data Summary.csv	C11b8	hsa-miR-30d	Target	MSC14		21.741	21.741
F:\OpenArray\Cycling Data\OA-20 (Mesenchymal Stem Cells) Cycling Data Summary.csv	C7b8	hsa-miR-30d	Target	MSC10		22.002	22.002
F:\OpenArray\Cycling Data\OA-20 (Mesenchymal Stem Cells) Cycling Data Summary.csv	A8a6	HSA-MIR-1179	Target	MSC4		29.366	29.366
F:\OpenArray\Cycling Data\OA-20 (Mesenchymal Stem Cells) Cycling Data Summary.csv	C3b8	hsa-miR-30d	Target	MSC21		21.081	21.081
F:\OpenArray\Cycling Data\OA-20 (Mesenchymal Stem Cells) Cycling Data Summary.csv	A4a6	HSA-MIR-1179	Target	MSC3		31.678	30
F:\OpenArray\Cycling Data\OA-20 (Mesenchymal Stem Cells) Cycling Data Summary.csv	C11b8	hsa-miR-30d	Target	MSC20		22.837	22.837
F:\OpenArray\Cycling Data\OA-20 (Mesenchymal Stem Cells) Cycling Data Summary.csv	C7b8	hsa-miR-30d	Target	MSC25		21.596	21.596
F:\OpenArray\Cycling Data\OA-20 (Mesenchymal Stem Cells) Cycling Data Summary.csv	C3b8	hsa-miR-30d	Target	MSC24		22.476	22.476
F:\OpenArray\Cycling Data\OA-20 (Mesenchymal Stem Cells) Cycling Data Summary.csv	C11b8	hsa-miR-30d	Target	MSC23		25.156	25.156
F:\OpenArray\Cycling Data\OA-20 (Mesenchymal Stem Cells) Cycling Data Summary.csv	C3c6	hsa-miR-214#	Target	MSC9		24.069	24.069
F:\OpenArray\Cycling Data\OA-20 (Mesenchymal Stem Cells) Cycling Data Summary.csv	C7b8	hsa-miR-30d	Target	MSC22		20.021	20.021
F:\OpenArray\Cycling Data\OA-20 (Mesenchymal Stem Cells) Cycling Data Summary.csv	C11c6	hsa-miR-214#	Target	MSC8		25.113	25.113
F:\OpenArray\Cycling Data\OA-20 (Mesenchymal Stem Cells) Cycling Data Summary.csv	C11b8	hsa-miR-30d	Target	MSC29		19.266	19.266
F:\OpenArray\Cycling Data\OA-20 (Mesenchymal Stem Cells) Cycling Data Summary.csv	C7c6	hsa-miR-214#	Target	MSC7		22.733	22.733
F:\OpenArray\Cycling Data\OA-20 (Mesenchymal Stem Cells) Cycling Data Summary.csv	C7b8	hsa-miR-30d	Target	MSC28		20.692	20.692
F:\OpenArray\Cycling Data\OA-20 (Mesenchymal Stem Cells) Cycling Data Summary.csv	C3c6	hsa-miR-214#	Target	MSC6		22.368	22.368
F:\OpenArray\Cycling Data\OA-20 (Mesenchymal Stem Cells) Cycling Data Summary.csv	B6b5	hsa-miR-369-3p	Target	MSC13		29.551	29.551
F:\OpenArray\Cycling Data\OA-20 (Mesenchymal Stem Cells) Cycling Data Summary.csv	C3b8	hsa-miR-30d	Target	MSC27		22.402	22.402
F:\OpenArray\Cycling Data\OA-20 (Mesenchymal Stem Cells) Cycling Data Summary.csv	A4a6	HSA-MIR-1179	Target	MSC9		29.319	29.319
F:\OpenArray\Cycling Data\OA-20 (Mesenchymal Stem Cells) Cycling Data Summary.csv	C11c6	hsa-miR-214#	Target	MSC5		25.655	25.655
F:\OpenArray\Cycling Data\OA-20 (Mesenchymal Stem Cells) Cycling Data Summary.csv	B2b5	hsa-miR-369-3p	Target	MSC12		28.037	28.037
F:\OpenArray\Cycling Data\OA-20 (Mesenchymal Stem Cells) Cycling Data Summary.csv	C11b8	hsa-miR-30d	Target	MSC26		23.655	23.655
F:\OpenArray\Cycling Data\OA-20 (Mesenchymal Stem Cells) Cycling Data Summary.csv	C7c6	hsa-miR-214#	Target	MSC4		22.381	22.381
F:\OpenArray\Cycling Data\OA-20 (Mesenchymal Stem Cells) Cycling Data Summary.csv	A8a6	HSA-MIR-1179	Target	MSC7		30.927	30
F:\OpenArray\Cycling Data\OA-20 (Mesenchymal Stem Cells) Cycling Data Summary.csv	C3c6	hsa-miR-214#	Target	MSC3		23.117	23.117
F:\OpenArray\Cycling Data\OA-20 (Mesenchymal Stem Cells) Cycling Data Summary.csv	B6b5	hsa-miR-369-3p	Target	MSC10		26.921	26.921
F:\OpenArray\Cycling Data\OA-20 (Mesenchymal Stem Cells) Cycling Data Summary.csv	C11c6	hsa-miR-214#	Target	MSC2		22.525	22.525
F:\OpenArray\Cycling Data\OA-20 (Mesenchymal Stem Cells) Cycling Data Summary.csv	B6a3	hsa-miR-328	Target	MSC28		17.411	17.411
F:\OpenArray\Cycling Data\OA-20 (Mesenchymal Stem Cells) Cycling Data Summary.csv	B10a3	hsa-miR-328	Target	MSC29		16.987	16.987
F:\OpenArray\Cycling Data\OA-20 (Mesenchymal Stem Cells) Cycling Data Summary.csv	B10a3	hsa-miR-328	Target	MSC20		17.149	17.149
F:\OpenArray\Cycling Data\OA-20 (Mesenchymal Stem Cells) Cycling Data Summary.csv	B2a3	hsa-miR-328	Target	MSC21		16.966	16.966
F:\OpenArray\Cycling Data\OA-20 (Mesenchymal Stem Cells) Cycling Data Summary.csv	B6a3	hsa-miR-328	Target	MSC22		17.875	17.875
F:\OpenArray\Cycling Data\OA-20 (Mesenchymal Stem Cells) Cycling Data Summary.csv	B10a3	hsa-miR-328	Target	MSC23		19.812	19.812
F:\OpenArray\Cycling Data\OA-20 (Mesenchymal Stem Cells) Cycling Data Summary.csv	B2a3	hsa-miR-328	Target	MSC24		17.33	17.33
F:\OpenArray\Cycling Data\OA-20 (Mesenchymal Stem Cells) Cycling Data Summary.csv	B6a3	hsa-miR-328	Target	MSC25		17.444	17.444
F:\OpenArray\Cycling Data\OA-20 (Mesenchymal Stem Cells) Cycling Data Summary.csv	B10a3	hsa-miR-328	Target	MSC26		19.814	19.814
F:\OpenArray\Cycling Data\OA-20 (Mesenchymal Stem Cells) Cycling Data Summary.csv	B2a3	hsa-miR-328	Target	MSC27		17.249	17.249
F:\OpenArray\Cycling Data\OA-20 (Mesenchymal Stem Cells) Cycling Data Summary.csv	B6a3	hsa-miR-328	Target	MSC19		16.997	16.997
F:\OpenArray\Cycling Data\OA-20 (Mesenchymal Stem Cells) Cycling Data Summary.csv	C10g5	hsa-miR-205	Target	MSC20		25.575	25.575
F:\OpenArray\Cycling Data\OA-20 (Mesenchymal Stem Cells) Cycling Data Summary.csv	B10a3	hsa-miR-328	Target	MSC17		18.406	18.406
F:\OpenArray\Cycling Data\OA-20 (Mesenchymal Stem Cells) Cycling Data Summary.csv	B2a3	hsa-miR-328	Target	MSC18		18.007	18.007
F:\OpenArray\Cycling Data\OA-20 (Mesenchymal Stem Cells) Cycling Data Summary.csv	B10a3	hsa-miR-328	Target	MSC11		18.499	18.499
F:\OpenArray\Cycling Data\OA-20 (Mesenchymal Stem Cells) Cycling Data Summary.csv	B2a3	hsa-miR-328	Target	MSC12		17.803	17.803
F:\OpenArray\Cycling Data\OA-20 (Mesenchymal Stem Cells) Cycling Data Summary.csv	C6g5	hsa-miR-205	Target	MSC28		26.162	26.162
F:\OpenArray\Cycling Data\OA-20 (Mesenchymal Stem Cells) Cycling Data Summary.csv	B6a3	hsa-miR-328	Target	MSC10		18.413	18.413
F:\OpenArray\Cycling Data\OA-20 (Mesenchymal Stem Cells) Cycling Data Summary.csv	B2a3	hsa-miR-328	Target	MSC15		17.046	17.046
F:\OpenArray\Cycling Data\OA-20 (Mesenchymal Stem Cells) Cycling Data Summary.csv	B6a3	hsa-miR-328	Target	MSC16		18.073	18.073
F:\OpenArray\Cycling Data\OA-20 (Mesenchymal Stem Cells) Cycling Data Summary.csv	B6a3	hsa-miR-328	Target	MSC13		17.479	17.479
F:\OpenArray\Cycling Data\OA-20 (Mesenchymal Stem Cells) Cycling Data Summary.csv	B10a3	hsa-miR-328	Target	MSC14		18.436	18.436
F:\OpenArray\Cycling Data\OA-20 (Mesenchymal Stem Cells) Cycling Data Summary.csv	A6b5	hsa-miR-483-5p	Target	MSC7		19.39	19.39
F:\OpenArray\Cycling Data\OA-20 (Mesenchymal Stem Cells) Cycling Data Summary.csv	A2b5	hsa-miR-483-5p	Target	MSC6		21.378	21.378
F:\OpenArray\Cycling Data\OA-20 (Mesenchymal Stem Cells) Cycling Data Summary.csv	A2b5	hsa-miR-483-5p	Target	MSC9		20.508	20.508
F:\OpenArray\Cycling Data\OA-20 (Mesenchymal Stem Cells) Cycling Data Summary.csv	A10b5	hsa-miR-483-5p	Target	MSC8		18.05	18.05
F:\OpenArray\Cycling Data\OA-20 (Mesenchymal Stem Cells) Cycling Data Summary.csv	A12c2	hsa-miR-26b#	Target	MSC17		27.331	27.331
F:\OpenArray\Cycling Data\OA-20 (Mesenchymal Stem Cells) Cycling Data Summary.csv	A4c2	hsa-miR-26b#	Target	MSC18		32.459	30
F:\OpenArray\Cycling Data\OA-20 (Mesenchymal Stem Cells) Cycling Data Summary.csv	A8c2	hsa-miR-26b#	Target	MSC19		30.568	30
F:\OpenArray\Cycling Data\OA-20 (Mesenchymal Stem Cells) Cycling Data Summary.csv	A8c2	hsa-miR-26b#	Target	MSC10		30.7	30
F:\OpenArray\Cycling Data\OA-20 (Mesenchymal Stem Cells) Cycling Data Summary.csv	B11c5	hsa-miR-151-3p	Target	MSC20		21.106	21.106
F:\OpenArray\Cycling Data\OA-20 (Mesenchymal Stem Cells) Cycling Data Summary.csv	B3c5	hsa-miR-151-3p	Target	MSC21		18.423	18.423
F:\OpenArray\Cycling Data\OA-20 (Mesenchymal Stem Cells) Cycling Data Summary.csv	A4c2	hsa-miR-26b#	Target	MSC12		28.905	28.905
F:\OpenArray\Cycling Data\OA-20 (Mesenchymal Stem Cells) Cycling Data Summary.csv	B7c5	hsa-miR-151-3p	Target	MSC22		19.202	19.202
F:\OpenArray\Cycling Data\OA-20 (Mesenchymal Stem Cells) Cycling Data Summary.csv	A12c2	hsa-miR-26b#	Target	MSC11		30.78	30
F:\OpenArray\Cycling Data\OA-20 (Mesenchymal Stem Cells) Cycling Data Summary.csv	B11c5	hsa-miR-151-3p	Target	MSC23		22.531	22.531
F:\OpenArray\Cycling Data\OA-20 (Mesenchymal Stem Cells) Cycling Data Summary.csv	A12c2	hsa-miR-26b#	Target	MSC14		27.441	27.441
F:\OpenArray\Cycling Data\OA-20 (Mesenchymal Stem Cells) Cycling Data Summary.csv	B3c5	hsa-miR-151-3p	Target	MSC24		21.799	21.799
F:\OpenArray\Cycling Data\OA-20 (Mesenchymal Stem Cells) Cycling Data Summary.csv	A8c2	hsa-miR-26b#	Target	MSC13		27.153	27.153
F:\OpenArray\Cycling Data\OA-20 (Mesenchymal Stem Cells) Cycling Data Summary.csv	B7c5	hsa-miR-151-3p	Target	MSC25		22.869	22.869
F:\OpenArray\Cycling Data\OA-20 (Mesenchymal Stem Cells) Cycling Data Summary.csv	A8c2	hsa-miR-26b#	Target	MSC16		26.967	26.967
F:\OpenArray\Cycling Data\OA-20 (Mesenchymal Stem Cells) Cycling Data Summary.csv	B11c5	hsa-miR-151-3p	Target	MSC26		22.912	22.912
F:\OpenArray\Cycling Data\OA-20 (Mesenchymal Stem Cells) Cycling Data Summary.csv	A4c2	hsa-miR-26b#	Target	MSC15		29.263	29.263
F:\OpenArray\Cycling Data\OA-20 (Mesenchymal Stem Cells) Cycling Data Summary.csv	B3c5	hsa-miR-151-3p	Target	MSC27		21.849	21.849
F:\OpenArray\Cycling Data\OA-20 (Mesenchymal Stem Cells) Cycling Data Summary.csv	B7c5	hsa-miR-151-3p	Target	MSC28		20.636	20.636
F:\OpenArray\Cycling Data\OA-20 (Mesenchymal Stem Cells) Cycling Data Summary.csv	B11c5	hsa-miR-151-3p	Target	MSC29		19.379	19.379
F:\OpenArray\Cycling Data\OA-20 (Mesenchymal Stem Cells) Cycling Data Summary.csv	C7d6	hsa-miR-155#	Target	MSC22		30.551	30
F:\OpenArray\Cycling Data\OA-20 (Mesenchymal Stem Cells) Cycling Data Summary.csv	B11c5	hsa-miR-151-3p	Target	MSC11		22.167	22.167
F:\OpenArray\Cycling Data\OA-20 (Mesenchymal Stem Cells) Cycling Data Summary.csv	B3c5	hsa-miR-151-3p	Target	MSC12		21.133	21.133
F:\OpenArray\Cycling Data\OA-20 (Mesenchymal Stem Cells) Cycling Data Summary.csv	B7c5	hsa-miR-151-3p	Target	MSC10		21.228	21.228
F:\OpenArray\Cycling Data\OA-20 (Mesenchymal Stem Cells) Cycling Data Summary.csv	B7c5	hsa-miR-151-3p	Target	MSC16		22.408	22.408
F:\OpenArray\Cycling Data\OA-20 (Mesenchymal Stem Cells) Cycling Data Summary.csv	B7c5	hsa-miR-151-3p	Target	MSC13		21.683	21.683
F:\OpenArray\Cycling Data\OA-20 (Mesenchymal Stem Cells) Cycling Data Summary.csv	B11c5	hsa-miR-151-3p	Target	MSC14		20.088	20.088
F:\OpenArray\Cycling Data\OA-20 (Mesenchymal Stem Cells) Cycling Data Summary.csv	A6b5	hsa-miR-483-5p	Target	MSC4		24.776	24.776
F:\OpenArray\Cycling Data\OA-20 (Mesenchymal Stem Cells) Cycling Data Summary.csv	B7c5	hsa-miR-151-3p	Target	MSC19		21.795	21.795
F:\OpenArray\Cycling Data\OA-20 (Mesenchymal Stem Cells) Cycling Data Summary.csv	A10b5	hsa-miR-483-5p	Target	MSC5		20.25	20.25
F:\OpenArray\Cycling Data\OA-20 (Mesenchymal Stem Cells) Cycling Data Summary.csv	A10b5	hsa-miR-483-5p	Target	MSC2		20.654	20.654
F:\OpenArray\Cycling Data\OA-20 (Mesenchymal Stem Cells) Cycling Data Summary.csv	B11c5	hsa-miR-151-3p	Target	MSC17		20.025	20.025
F:\OpenArray\Cycling Data\OA-20 (Mesenchymal Stem Cells) Cycling Data Summary.csv	A2b5	hsa-miR-483-5p	Target	MSC3		23.397	23.397
F:\OpenArray\Cycling Data\OA-20 (Mesenchymal Stem Cells) Cycling Data Summary.csv	B3c5	hsa-miR-151-3p	Target	MSC18		23.493	23.493
F:\OpenArray\Cycling Data\OA-20 (Mesenchymal Stem Cells) Cycling Data Summary.csv	A6b5	hsa-miR-483-5p	Target	MSC1		28.499	28.499
F:\OpenArray\Cycling Data\OA-20 (Mesenchymal Stem Cells) Cycling Data Summary.csv	B5a2	hsa-miR-100	Target	MSC16		13.093	13.093
F:\OpenArray\Cycling Data\OA-20 (Mesenchymal Stem Cells) Cycling Data Summary.csv	B1a2	hsa-miR-100	Target	MSC15		12.205	12.205
F:\OpenArray\Cycling Data\OA-20 (Mesenchymal Stem Cells) Cycling Data Summary.csv	B3e1	hsa-miR-941	Target	MSC12		24.493	24.493
F:\OpenArray\Cycling Data\OA-20 (Mesenchymal Stem Cells) Cycling Data Summary.csv	B9a2	hsa-miR-100	Target	MSC14		13.73	13.73
F:\OpenArray\Cycling Data\OA-20 (Mesenchymal Stem Cells) Cycling Data Summary.csv	B5a2	hsa-miR-100	Target	MSC13		14.064	14.064
F:\OpenArray\Cycling Data\OA-20 (Mesenchymal Stem Cells) Cycling Data Summary.csv	B1a2	hsa-miR-100	Target	MSC12		14.345	14.345
F:\OpenArray\Cycling Data\OA-20 (Mesenchymal Stem Cells) Cycling Data Summary.csv	B9a2	hsa-miR-100	Target	MSC11		13.209	13.209
F:\OpenArray\Cycling Data\OA-20 (Mesenchymal Stem Cells) Cycling Data Summary.csv	B5a2	hsa-miR-100	Target	MSC10		13.22	13.22
F:\OpenArray\Cycling Data\OA-20 (Mesenchymal Stem Cells) Cycling Data Summary.csv	B3e1	hsa-miR-941	Target	MSC15		24.741	24.741
F:\OpenArray\Cycling Data\OA-20 (Mesenchymal Stem Cells) Cycling Data Summary.csv	B11c4	HSA-MIR-1300	Target	MSC2		26.151	26.151
F:\OpenArray\Cycling Data\OA-20 (Mesenchymal Stem Cells) Cycling Data Summary.csv	B3c4	HSA-MIR-1300	Target	MSC3		29.258	29.258
F:\OpenArray\Cycling Data\OA-20 (Mesenchymal Stem Cells) Cycling Data Summary.csv	B7c4	HSA-MIR-1300	Target	MSC4		25.391	25.391
F:\OpenArray\Cycling Data\OA-20 (Mesenchymal Stem Cells) Cycling Data Summary.csv	B3c4	HSA-MIR-1300	Target	MSC9		26.933	26.933
F:\OpenArray\Cycling Data\OA-20 (Mesenchymal Stem Cells) Cycling Data Summary.csv	B11c4	HSA-MIR-1300	Target	MSC5		26.903	26.903
F:\OpenArray\Cycling Data\OA-20 (Mesenchymal Stem Cells) Cycling Data Summary.csv	B3c4	HSA-MIR-1300	Target	MSC6		25.456	25.456
F:\OpenArray\Cycling Data\OA-20 (Mesenchymal Stem Cells) Cycling Data Summary.csv	B7c4	HSA-MIR-1300	Target	MSC7		24.478	24.478
F:\OpenArray\Cycling Data\OA-20 (Mesenchymal Stem Cells) Cycling Data Summary.csv	B11c4	HSA-MIR-1300	Target	MSC8		26.037	26.037
F:\OpenArray\Cycling Data\OA-20 (Mesenchymal Stem Cells) Cycling Data Summary.csv	B5a2	hsa-miR-100	Target	MSC25		12.207	12.207
F:\OpenArray\Cycling Data\OA-20 (Mesenchymal Stem Cells) Cycling Data Summary.csv	B1a2	hsa-miR-100	Target	MSC24		12.414	12.414
F:\OpenArray\Cycling Data\OA-20 (Mesenchymal Stem Cells) Cycling Data Summary.csv	B1a2	hsa-miR-100	Target	MSC27		11.78	11.78
F:\OpenArray\Cycling Data\OA-20 (Mesenchymal Stem Cells) Cycling Data Summary.csv	B9a2	hsa-miR-100	Target	MSC26		15.241	15.241
F:\OpenArray\Cycling Data\OA-20 (Mesenchymal Stem Cells) Cycling Data Summary.csv	B1a2	hsa-miR-100	Target	MSC21		12.34	12.34
F:\OpenArray\Cycling Data\OA-20 (Mesenchymal Stem Cells) Cycling Data Summary.csv	B9a2	hsa-miR-100	Target	MSC20		13.047	13.047
F:\OpenArray\Cycling Data\OA-20 (Mesenchymal Stem Cells) Cycling Data Summary.csv	B9a2	hsa-miR-100	Target	MSC23		14.241	14.241
F:\OpenArray\Cycling Data\OA-20 (Mesenchymal Stem Cells) Cycling Data Summary.csv	B5a2	hsa-miR-100	Target	MSC22		11.975	11.975
F:\OpenArray\Cycling Data\OA-20 (Mesenchymal Stem Cells) Cycling Data Summary.csv	A11b8	hsa-miR-431#	Target	MSC14		16.987	16.987
F:\OpenArray\Cycling Data\OA-20 (Mesenchymal Stem Cells) Cycling Data Summary.csv	A8e3	hsa-miR-662	Target	MSC22		27.222	27.222
F:\OpenArray\Cycling Data\OA-20 (Mesenchymal Stem Cells) Cycling Data Summary.csv	B9a2	hsa-miR-100	Target	MSC17		13.83	13.83
F:\OpenArray\Cycling Data\OA-20 (Mesenchymal Stem Cells) Cycling Data Summary.csv	B1a2	hsa-miR-100	Target	MSC18		15.244	15.244
F:\OpenArray\Cycling Data\OA-20 (Mesenchymal Stem Cells) Cycling Data Summary.csv	B5a2	hsa-miR-100	Target	MSC19		12.934	12.934
F:\OpenArray\Cycling Data\OA-20 (Mesenchymal Stem Cells) Cycling Data Summary.csv	B4c8	HSA-MIR-1243	Target	MSC12		31.537	30
F:\OpenArray\Cycling Data\OA-20 (Mesenchymal Stem Cells) Cycling Data Summary.csv	B4e4	hsa-miR-524	Target	MSC24		31.012	30
F:\OpenArray\Cycling Data\OA-20 (Mesenchymal Stem Cells) Cycling Data Summary.csv	C4b5	hsa-miR-26a-1#	Target	MSC9		29.227	29.227
F:\OpenArray\Cycling Data\OA-20 (Mesenchymal Stem Cells) Cycling Data Summary.csv	C4b5	hsa-miR-26a-1#	Target	MSC6		28.511	28.511
F:\OpenArray\Cycling Data\OA-20 (Mesenchymal Stem Cells) Cycling Data Summary.csv	C12b5	hsa-miR-26a-1#	Target	MSC5		28.531	28.531
F:\OpenArray\Cycling Data\OA-20 (Mesenchymal Stem Cells) Cycling Data Summary.csv	C12b5	hsa-miR-26a-1#	Target	MSC8		27.239	27.239
F:\OpenArray\Cycling Data\OA-20 (Mesenchymal Stem Cells) Cycling Data Summary.csv	C8b5	hsa-miR-26a-1#	Target	MSC7		26.846	26.846
F:\OpenArray\Cycling Data\OA-20 (Mesenchymal Stem Cells) Cycling Data Summary.csv	C12b5	hsa-miR-26a-1#	Target	MSC2		26.011	26.011
F:\OpenArray\Cycling Data\OA-20 (Mesenchymal Stem Cells) Cycling Data Summary.csv	C8b5	hsa-miR-26a-1#	Target	MSC4		28.608	28.608
F:\OpenArray\Cycling Data\OA-20 (Mesenchymal Stem Cells) Cycling Data Summary.csv	C4b5	hsa-miR-26a-1#	Target	MSC3		28.228	28.228
F:\OpenArray\Cycling Data\OA-20 (Mesenchymal Stem Cells) Cycling Data Summary.csv	B6e1	hsa-miR-200c	Target	MSC10		23.746	23.746
F:\OpenArray\Cycling Data\OA-20 (Mesenchymal Stem Cells) Cycling Data Summary.csv	C9c4	hsa-miR-141	Target	MSC8		27.63	27.63
F:\OpenArray\Cycling Data\OA-20 (Mesenchymal Stem Cells) Cycling Data Summary.csv	C5c4	hsa-miR-141	Target	MSC4		27.448	27.448
F:\OpenArray\Cycling Data\OA-20 (Mesenchymal Stem Cells) Cycling Data Summary.csv	C1c4	hsa-miR-141	Target	MSC3		24.712	24.712
F:\OpenArray\Cycling Data\OA-20 (Mesenchymal Stem Cells) Cycling Data Summary.csv	B2e1	hsa-miR-200c	Target	MSC21		23.399	23.399
F:\OpenArray\Cycling Data\OA-20 (Mesenchymal Stem Cells) Cycling Data Summary.csv	B6e1	hsa-miR-200c	Target	MSC22		22.885	22.885
F:\OpenArray\Cycling Data\OA-20 (Mesenchymal Stem Cells) Cycling Data Summary.csv	D12e1	hsa-miR-625#	Target	MSC2		22.227	22.227
F:\OpenArray\Cycling Data\OA-20 (Mesenchymal Stem Cells) Cycling Data Summary.csv	D4e1	hsa-miR-625#	Target	MSC3		22.403	22.403
F:\OpenArray\Cycling Data\OA-20 (Mesenchymal Stem Cells) Cycling Data Summary.csv	D8e1	hsa-miR-625#	Target	MSC4		22.683	22.683
F:\OpenArray\Cycling Data\OA-20 (Mesenchymal Stem Cells) Cycling Data Summary.csv	D4e1	hsa-miR-625#	Target	MSC6		22.255	22.255
F:\OpenArray\Cycling Data\OA-20 (Mesenchymal Stem Cells) Cycling Data Summary.csv	B10e1	hsa-miR-200c	Target	MSC17		30.437	30
F:\OpenArray\Cycling Data\OA-20 (Mesenchymal Stem Cells) Cycling Data Summary.csv	D12e1	hsa-miR-625#	Target	MSC5		23.876	23.876
F:\OpenArray\Cycling Data\OA-20 (Mesenchymal Stem Cells) Cycling Data Summary.csv	D12e1	hsa-miR-625#	Target	MSC8		20.931	20.931
F:\OpenArray\Cycling Data\OA-20 (Mesenchymal Stem Cells) Cycling Data Summary.csv	B9a2	hsa-miR-100	Target	MSC29		10.788	10.788
F:\OpenArray\Cycling Data\OA-20 (Mesenchymal Stem Cells) Cycling Data Summary.csv	D8e1	hsa-miR-625#	Target	MSC7		21.274	21.274
F:\OpenArray\Cycling Data\OA-20 (Mesenchymal Stem Cells) Cycling Data Summary.csv	B5a2	hsa-miR-100	Target	MSC28		11.474	11.474
F:\OpenArray\Cycling Data\OA-20 (Mesenchymal Stem Cells) Cycling Data Summary.csv	B6e1	hsa-miR-200c	Target	MSC13		23.111	23.111
F:\OpenArray\Cycling Data\OA-20 (Mesenchymal Stem Cells) Cycling Data Summary.csv	D4e1	hsa-miR-625#	Target	MSC9		22.602	22.602
F:\OpenArray\Cycling Data\OA-20 (Mesenchymal Stem Cells) Cycling Data Summary.csv	B10e1	hsa-miR-200c	Target	MSC14		23.768	23.768
F:\OpenArray\Cycling Data\OA-20 (Mesenchymal Stem Cells) Cycling Data Summary.csv	D2e4	hsa-miR-545	Target	MSC21		25.973	25.973
F:\OpenArray\Cycling Data\OA-20 (Mesenchymal Stem Cells) Cycling Data Summary.csv	D6e4	hsa-miR-545	Target	MSC22		26.606	26.606
F:\OpenArray\Cycling Data\OA-20 (Mesenchymal Stem Cells) Cycling Data Summary.csv	B6e1	hsa-miR-200c	Target	MSC28		23.355	23.355
F:\OpenArray\Cycling Data\OA-20 (Mesenchymal Stem Cells) Cycling Data Summary.csv	B10e1	hsa-miR-200c	Target	MSC29		21.973	21.973
F:\OpenArray\Cycling Data\OA-20 (Mesenchymal Stem Cells) Cycling Data Summary.csv	B2e1	hsa-miR-200c	Target	MSC24		22.889	22.889
F:\OpenArray\Cycling Data\OA-20 (Mesenchymal Stem Cells) Cycling Data Summary.csv	B6e1	hsa-miR-200c	Target	MSC25		23.719	23.719
F:\OpenArray\Cycling Data\OA-20 (Mesenchymal Stem Cells) Cycling Data Summary.csv	C7d5	HSA-MIR-1248	Target	MSC10		28.574	28.574
F:\OpenArray\Cycling Data\OA-20 (Mesenchymal Stem Cells) Cycling Data Summary.csv	C6b8	hsa-miR-221	Target	MSC28		13.342	13.342
F:\OpenArray\Cycling Data\OA-20 (Mesenchymal Stem Cells) Cycling Data Summary.csv	C10b8	hsa-miR-221	Target	MSC29		13.155	13.155
F:\OpenArray\Cycling Data\OA-20 (Mesenchymal Stem Cells) Cycling Data Summary.csv	B12c3	HSA-MIR-1270	Target	MSC5		26.377	26.377
F:\OpenArray\Cycling Data\OA-20 (Mesenchymal Stem Cells) Cycling Data Summary.csv	B12c3	HSA-MIR-1270	Target	MSC8		26.336	26.336
F:\OpenArray\Cycling Data\OA-20 (Mesenchymal Stem Cells) Cycling Data Summary.csv	B4c3	HSA-MIR-1270	Target	MSC9		24.821	24.821
F:\OpenArray\Cycling Data\OA-20 (Mesenchymal Stem Cells) Cycling Data Summary.csv	D5e5	hsa-miR-512-3p	Target	MSC4		26.806	26.806
F:\OpenArray\Cycling Data\OA-20 (Mesenchymal Stem Cells) Cycling Data Summary.csv	B4c3	HSA-MIR-1270	Target	MSC3		24.837	24.837
F:\OpenArray\Cycling Data\OA-20 (Mesenchymal Stem Cells) Cycling Data Summary.csv	B12c3	HSA-MIR-1270	Target	MSC2		26.573	26.573
F:\OpenArray\Cycling Data\OA-20 (Mesenchymal Stem Cells) Cycling Data Summary.csv	D9e5	hsa-miR-512-3p	Target	MSC2		27.269	27.269
F:\OpenArray\Cycling Data\OA-20 (Mesenchymal Stem Cells) Cycling Data Summary.csv	C3d5	HSA-MIR-1248	Target	MSC27		30.091	30
F:\OpenArray\Cycling Data\OA-20 (Mesenchymal Stem Cells) Cycling Data Summary.csv	C7d5	HSA-MIR-1248	Target	MSC25		32.321	30
F:\OpenArray\Cycling Data\OA-20 (Mesenchymal Stem Cells) Cycling Data Summary.csv	C7d5	HSA-MIR-1248	Target	MSC22		26.31	26.31
F:\OpenArray\Cycling Data\OA-20 (Mesenchymal Stem Cells) Cycling Data Summary.csv	B10e8	hsa-miR-301b	Target	MSC20		27.026	27.026
F:\OpenArray\Cycling Data\OA-20 (Mesenchymal Stem Cells) Cycling Data Summary.csv	B6e8	hsa-miR-301b	Target	MSC19		30.708	30
F:\OpenArray\Cycling Data\OA-20 (Mesenchymal Stem Cells) Cycling Data Summary.csv	B10e8	hsa-miR-301b	Target	MSC11		27.595	27.595
F:\OpenArray\Cycling Data\OA-20 (Mesenchymal Stem Cells) Cycling Data Summary.csv	B6e8	hsa-miR-301b	Target	MSC10		28.189	28.189
F:\OpenArray\Cycling Data\OA-20 (Mesenchymal Stem Cells) Cycling Data Summary.csv	B6e8	hsa-miR-301b	Target	MSC13		25.595	25.595
F:\OpenArray\Cycling Data\OA-20 (Mesenchymal Stem Cells) Cycling Data Summary.csv	B2e8	hsa-miR-301b	Target	MSC12		27.676	27.676
F:\OpenArray\Cycling Data\OA-20 (Mesenchymal Stem Cells) Cycling Data Summary.csv	C11d5	HSA-MIR-1248	Target	MSC29		28.979	28.979
F:\OpenArray\Cycling Data\OA-20 (Mesenchymal Stem Cells) Cycling Data Summary.csv	B10e8	hsa-miR-301b	Target	MSC17		26.725	26.725
F:\OpenArray\Cycling Data\OA-20 (Mesenchymal Stem Cells) Cycling Data Summary.csv	C7d5	HSA-MIR-1248	Target	MSC28		28.4	28.4
F:\OpenArray\Cycling Data\OA-20 (Mesenchymal Stem Cells) Cycling Data Summary.csv	A1b8	hsa-miR-30c	Target	MSC24		15.122	15.122
F:\OpenArray\Cycling Data\OA-20 (Mesenchymal Stem Cells) Cycling Data Summary.csv	A9b8	hsa-miR-30c	Target	MSC23		18.439	18.439
F:\OpenArray\Cycling Data\OA-20 (Mesenchymal Stem Cells) Cycling Data Summary.csv	A5b8	hsa-miR-30c	Target	MSC22		15.483	15.483
F:\OpenArray\Cycling Data\OA-20 (Mesenchymal Stem Cells) Cycling Data Summary.csv	A1b8	hsa-miR-30c	Target	MSC21		14.429	14.429
F:\OpenArray\Cycling Data\OA-20 (Mesenchymal Stem Cells) Cycling Data Summary.csv	A9b8	hsa-miR-30c	Target	MSC20		25.082	25.082
F:\OpenArray\Cycling Data\OA-20 (Mesenchymal Stem Cells) Cycling Data Summary.csv	A3c6	hsa-let-7e#	Target	MSC9		30.666	30
F:\OpenArray\Cycling Data\OA-20 (Mesenchymal Stem Cells) Cycling Data Summary.csv	A7c6	hsa-let-7e#	Target	MSC7		32.696	30
F:\OpenArray\Cycling Data\OA-20 (Mesenchymal Stem Cells) Cycling Data Summary.csv	A11c6	hsa-let-7e#	Target	MSC8		30.151	30
F:\OpenArray\Cycling Data\OA-20 (Mesenchymal Stem Cells) Cycling Data Summary.csv	A11c6	hsa-let-7e#	Target	MSC5		30.914	30
F:\OpenArray\Cycling Data\OA-20 (Mesenchymal Stem Cells) Cycling Data Summary.csv	A3c6	hsa-let-7e#	Target	MSC6		31.964	30
F:\OpenArray\Cycling Data\OA-20 (Mesenchymal Stem Cells) Cycling Data Summary.csv	A9b8	hsa-miR-30c	Target	MSC29		13.073	13.073
F:\OpenArray\Cycling Data\OA-20 (Mesenchymal Stem Cells) Cycling Data Summary.csv	A3c6	hsa-let-7e#	Target	MSC3		31.608	30
F:\OpenArray\Cycling Data\OA-20 (Mesenchymal Stem Cells) Cycling Data Summary.csv	A5b8	hsa-miR-30c	Target	MSC28		14.546	14.546
F:\OpenArray\Cycling Data\OA-20 (Mesenchymal Stem Cells) Cycling Data Summary.csv	B2f2	hsa-miR-450b-5p	Target	MSC15		30.574	30
F:\OpenArray\Cycling Data\OA-20 (Mesenchymal Stem Cells) Cycling Data Summary.csv	A1b8	hsa-miR-30c	Target	MSC27		15.14	15.14
F:\OpenArray\Cycling Data\OA-20 (Mesenchymal Stem Cells) Cycling Data Summary.csv	A9b8	hsa-miR-30c	Target	MSC26		18.125	18.125
F:\OpenArray\Cycling Data\OA-20 (Mesenchymal Stem Cells) Cycling Data Summary.csv	A5b8	hsa-miR-30c	Target	MSC25		14.994	14.994
F:\OpenArray\Cycling Data\OA-20 (Mesenchymal Stem Cells) Cycling Data Summary.csv	D5a6	hsa-miR-329	Target	MSC19		26.836	26.836
F:\OpenArray\Cycling Data\OA-20 (Mesenchymal Stem Cells) Cycling Data Summary.csv	D9a6	hsa-miR-329	Target	MSC14		28.287	28.287
F:\OpenArray\Cycling Data\OA-20 (Mesenchymal Stem Cells) Cycling Data Summary.csv	D1a6	hsa-miR-329	Target	MSC15		26.112	26.112
F:\OpenArray\Cycling Data\OA-20 (Mesenchymal Stem Cells) Cycling Data Summary.csv	D9a6	hsa-miR-329	Target	MSC17		27.227	27.227
F:\OpenArray\Cycling Data\OA-20 (Mesenchymal Stem Cells) Cycling Data Summary.csv	D5a6	hsa-miR-329	Target	MSC10		30.999	30
F:\OpenArray\Cycling Data\OA-20 (Mesenchymal Stem Cells) Cycling Data Summary.csv	A9b8	hsa-miR-30c	Target	MSC11		15.69	15.69
F:\OpenArray\Cycling Data\OA-20 (Mesenchymal Stem Cells) Cycling Data Summary.csv	B2f2	hsa-miR-450b-5p	Target	MSC21		27.935	27.935
F:\OpenArray\Cycling Data\OA-20 (Mesenchymal Stem Cells) Cycling Data Summary.csv	A5b8	hsa-miR-30c	Target	MSC10		15.969	15.969
F:\OpenArray\Cycling Data\OA-20 (Mesenchymal Stem Cells) Cycling Data Summary.csv	A1b8	hsa-miR-30c	Target	MSC12		27.66	27.66
F:\OpenArray\Cycling Data\OA-20 (Mesenchymal Stem Cells) Cycling Data Summary.csv	B10f2	hsa-miR-450b-5p	Target	MSC29		26.495	26.495
F:\OpenArray\Cycling Data\OA-20 (Mesenchymal Stem Cells) Cycling Data Summary.csv	A5b8	hsa-miR-30c	Target	MSC19		20.453	20.453
F:\OpenArray\Cycling Data\OA-20 (Mesenchymal Stem Cells) Cycling Data Summary.csv	A1b8	hsa-miR-30c	Target	MSC18		24.165	24.165
F:\OpenArray\Cycling Data\OA-20 (Mesenchymal Stem Cells) Cycling Data Summary.csv	B6f2	hsa-miR-450b-5p	Target	MSC28		27.12	27.12
F:\OpenArray\Cycling Data\OA-20 (Mesenchymal Stem Cells) Cycling Data Summary.csv	A1b8	hsa-miR-30c	Target	MSC15		15.693	15.693
F:\OpenArray\Cycling Data\OA-20 (Mesenchymal Stem Cells) Cycling Data Summary.csv	A9b8	hsa-miR-30c	Target	MSC14		25.121	25.121
F:\OpenArray\Cycling Data\OA-20 (Mesenchymal Stem Cells) Cycling Data Summary.csv	B2f2	hsa-miR-450b-5p	Target	MSC24		27.25	27.25
F:\OpenArray\Cycling Data\OA-20 (Mesenchymal Stem Cells) Cycling Data Summary.csv	A9b8	hsa-miR-30c	Target	MSC17		33.213	30
F:\OpenArray\Cycling Data\OA-20 (Mesenchymal Stem Cells) Cycling Data Summary.csv	A5b8	hsa-miR-30c	Target	MSC16		24.151	24.151
F:\OpenArray\Cycling Data\OA-20 (Mesenchymal Stem Cells) Cycling Data Summary.csv	D9a6	hsa-miR-329	Target	MSC29		25.893	25.893
F:\OpenArray\Cycling Data\OA-20 (Mesenchymal Stem Cells) Cycling Data Summary.csv	D8e7	hsa-miR-516-3p	Target	MSC13		28.73	28.73
F:\OpenArray\Cycling Data\OA-20 (Mesenchymal Stem Cells) Cycling Data Summary.csv	D9a6	hsa-miR-329	Target	MSC23		34.06	30
F:\OpenArray\Cycling Data\OA-20 (Mesenchymal Stem Cells) Cycling Data Summary.csv	D4e7	hsa-miR-516-3p	Target	MSC15		29.781	29.781
F:\OpenArray\Cycling Data\OA-20 (Mesenchymal Stem Cells) Cycling Data Summary.csv	D1a6	hsa-miR-329	Target	MSC21		26.536	26.536
F:\OpenArray\Cycling Data\OA-20 (Mesenchymal Stem Cells) Cycling Data Summary.csv	C9d3	hsa-miR-146b-3p	Target	MSC29		26.953	26.953
F:\OpenArray\Cycling Data\OA-20 (Mesenchymal Stem Cells) Cycling Data Summary.csv	D5a6	hsa-miR-329	Target	MSC22		26.299	26.299
F:\OpenArray\Cycling Data\OA-20 (Mesenchymal Stem Cells) Cycling Data Summary.csv	D12e7	hsa-miR-516-3p	Target	MSC17		27.014	27.014
F:\OpenArray\Cycling Data\OA-20 (Mesenchymal Stem Cells) Cycling Data Summary.csv	D1a6	hsa-miR-329	Target	MSC27		26.487	26.487
F:\OpenArray\Cycling Data\OA-20 (Mesenchymal Stem Cells) Cycling Data Summary.csv	D5a6	hsa-miR-329	Target	MSC28		25.764	25.764
F:\OpenArray\Cycling Data\OA-20 (Mesenchymal Stem Cells) Cycling Data Summary.csv	D5a6	hsa-miR-329	Target	MSC25		27.511	27.511
F:\OpenArray\Cycling Data\OA-20 (Mesenchymal Stem Cells) Cycling Data Summary.csv	C5d3	hsa-miR-146b-3p	Target	MSC25		30.355	30
F:\OpenArray\Cycling Data\OA-20 (Mesenchymal Stem Cells) Cycling Data Summary.csv	C2b8	hsa-miR-221	Target	MSC15		13.855	13.855
F:\OpenArray\Cycling Data\OA-20 (Mesenchymal Stem Cells) Cycling Data Summary.csv	C6b8	hsa-miR-221	Target	MSC16		13.8	13.8
F:\OpenArray\Cycling Data\OA-20 (Mesenchymal Stem Cells) Cycling Data Summary.csv	C6b8	hsa-miR-221	Target	MSC13		13.653	13.653
F:\OpenArray\Cycling Data\OA-20 (Mesenchymal Stem Cells) Cycling Data Summary.csv	C10b8	hsa-miR-221	Target	MSC14		14.201	14.201
F:\OpenArray\Cycling Data\OA-20 (Mesenchymal Stem Cells) Cycling Data Summary.csv	C10b8	hsa-miR-221	Target	MSC11		14.65	14.65
F:\OpenArray\Cycling Data\OA-20 (Mesenchymal Stem Cells) Cycling Data Summary.csv	D9a6	hsa-miR-329	Target	MSC20		27.865	27.865
F:\OpenArray\Cycling Data\OA-20 (Mesenchymal Stem Cells) Cycling Data Summary.csv	C2b8	hsa-miR-221	Target	MSC12		14.384	14.384
F:\OpenArray\Cycling Data\OA-20 (Mesenchymal Stem Cells) Cycling Data Summary.csv	D12e7	hsa-miR-516-3p	Target	MSC20		30.799	30
F:\OpenArray\Cycling Data\OA-20 (Mesenchymal Stem Cells) Cycling Data Summary.csv	D4e7	hsa-miR-516-3p	Target	MSC21		31.46	30
F:\OpenArray\Cycling Data\OA-20 (Mesenchymal Stem Cells) Cycling Data Summary.csv	C6b8	hsa-miR-221	Target	MSC10		14.469	14.469
F:\OpenArray\Cycling Data\OA-20 (Mesenchymal Stem Cells) Cycling Data Summary.csv	D8e7	hsa-miR-516-3p	Target	MSC22		28.261	28.261
F:\OpenArray\Cycling Data\OA-20 (Mesenchymal Stem Cells) Cycling Data Summary.csv	C9f2	hsa-miR-152	Target	MSC2		18.021	18.021
F:\OpenArray\Cycling Data\OA-20 (Mesenchymal Stem Cells) Cycling Data Summary.csv	C5f2	hsa-miR-152	Target	MSC4		16.616	16.616
F:\OpenArray\Cycling Data\OA-20 (Mesenchymal Stem Cells) Cycling Data Summary.csv	C1f2	hsa-miR-152	Target	MSC3		15.68	15.68
F:\OpenArray\Cycling Data\OA-20 (Mesenchymal Stem Cells) Cycling Data Summary.csv	C1f2	hsa-miR-152	Target	MSC9		17.168	17.168
F:\OpenArray\Cycling Data\OA-20 (Mesenchymal Stem Cells) Cycling Data Summary.csv	C1f2	hsa-miR-152	Target	MSC6		17.28	17.28
F:\OpenArray\Cycling Data\OA-20 (Mesenchymal Stem Cells) Cycling Data Summary.csv	C2b8	hsa-miR-221	Target	MSC18		16.477	16.477
F:\OpenArray\Cycling Data\OA-20 (Mesenchymal Stem Cells) Cycling Data Summary.csv	C9f2	hsa-miR-152	Target	MSC5		23.253	23.253
F:\OpenArray\Cycling Data\OA-20 (Mesenchymal Stem Cells) Cycling Data Summary.csv	C10b8	hsa-miR-221	Target	MSC17		13.711	13.711
F:\OpenArray\Cycling Data\OA-20 (Mesenchymal Stem Cells) Cycling Data Summary.csv	C9f2	hsa-miR-152	Target	MSC8		18.207	18.207
F:\OpenArray\Cycling Data\OA-20 (Mesenchymal Stem Cells) Cycling Data Summary.csv	C5f2	hsa-miR-152	Target	MSC7		16.702	16.702
F:\OpenArray\Cycling Data\OA-20 (Mesenchymal Stem Cells) Cycling Data Summary.csv	C7f3	hsa-miR-641	Target	MSC19		27.846	27.846
F:\OpenArray\Cycling Data\OA-20 (Mesenchymal Stem Cells) Cycling Data Summary.csv	C6b8	hsa-miR-221	Target	MSC19		13.963	13.963
F:\OpenArray\Cycling Data\OA-20 (Mesenchymal Stem Cells) Cycling Data Summary.csv	C2b8	hsa-miR-221	Target	MSC24		14.227	14.227
F:\OpenArray\Cycling Data\OA-20 (Mesenchymal Stem Cells) Cycling Data Summary.csv	C11f3	hsa-miR-641	Target	MSC29		29.829	29.829
F:\OpenArray\Cycling Data\OA-20 (Mesenchymal Stem Cells) Cycling Data Summary.csv	C6b8	hsa-miR-221	Target	MSC25		13.703	13.703
F:\OpenArray\Cycling Data\OA-20 (Mesenchymal Stem Cells) Cycling Data Summary.csv	C10b8	hsa-miR-221	Target	MSC26		17.77	17.77
F:\OpenArray\Cycling Data\OA-20 (Mesenchymal Stem Cells) Cycling Data Summary.csv	C2b8	hsa-miR-221	Target	MSC27		13.441	13.441
F:\OpenArray\Cycling Data\OA-20 (Mesenchymal Stem Cells) Cycling Data Summary.csv	C10b8	hsa-miR-221	Target	MSC20		13.842	13.842
F:\OpenArray\Cycling Data\OA-20 (Mesenchymal Stem Cells) Cycling Data Summary.csv	C2b8	hsa-miR-221	Target	MSC21		14.173	14.173
F:\OpenArray\Cycling Data\OA-20 (Mesenchymal Stem Cells) Cycling Data Summary.csv	C7f3	hsa-miR-641	Target	MSC25		27.954	27.954
F:\OpenArray\Cycling Data\OA-20 (Mesenchymal Stem Cells) Cycling Data Summary.csv	C6b8	hsa-miR-221	Target	MSC22		13.705	13.705
F:\OpenArray\Cycling Data\OA-20 (Mesenchymal Stem Cells) Cycling Data Summary.csv	C10b8	hsa-miR-221	Target	MSC23		16.851	16.851
F:\OpenArray\Cycling Data\OA-20 (Mesenchymal Stem Cells) Cycling Data Summary.csv	B12f8	hsa-miR-550	Target	MSC20		28.852	28.852
F:\OpenArray\Cycling Data\OA-20 (Mesenchymal Stem Cells) Cycling Data Summary.csv	D3a4	hsa-miR-550	Target	MSC24		29.386	29.386
F:\OpenArray\Cycling Data\OA-20 (Mesenchymal Stem Cells) Cycling Data Summary.csv	D7a4	hsa-miR-550	Target	MSC16		30.851	30
F:\OpenArray\Cycling Data\OA-20 (Mesenchymal Stem Cells) Cycling Data Summary.csv	B8f8	hsa-miR-550	Target	MSC19		28.011	28.011
F:\OpenArray\Cycling Data\OA-20 (Mesenchymal Stem Cells) Cycling Data Summary.csv	B4f8	hsa-miR-550	Target	MSC15		32.149	30
F:\OpenArray\Cycling Data\OA-20 (Mesenchymal Stem Cells) Cycling Data Summary.csv	D3a4	hsa-miR-550	Target	MSC15		28.996	28.996
F:\OpenArray\Cycling Data\OA-20 (Mesenchymal Stem Cells) Cycling Data Summary.csv	B8f8	hsa-miR-550	Target	MSC13		28.465	28.465
F:\OpenArray\Cycling Data\OA-20 (Mesenchymal Stem Cells) Cycling Data Summary.csv	C1f6	hsa-miR-191	Target	MSC12		16.411	16.411
F:\OpenArray\Cycling Data\OA-20 (Mesenchymal Stem Cells) Cycling Data Summary.csv	C9f6	hsa-miR-191	Target	MSC11		15.088	15.088
F:\OpenArray\Cycling Data\OA-20 (Mesenchymal Stem Cells) Cycling Data Summary.csv	B3g5	hsa-miR-601	Target	MSC9		32.058	30
F:\OpenArray\Cycling Data\OA-20 (Mesenchymal Stem Cells) Cycling Data Summary.csv	C5f6	hsa-miR-191	Target	MSC10		15.165	15.165
F:\OpenArray\Cycling Data\OA-20 (Mesenchymal Stem Cells) Cycling Data Summary.csv	C5f6	hsa-miR-191	Target	MSC16		13.12	13.12
F:\OpenArray\Cycling Data\OA-20 (Mesenchymal Stem Cells) Cycling Data Summary.csv	B3g5	hsa-miR-601	Target	MSC6		27.552	27.552
F:\OpenArray\Cycling Data\OA-20 (Mesenchymal Stem Cells) Cycling Data Summary.csv	C1f6	hsa-miR-191	Target	MSC15		13.516	13.516
F:\OpenArray\Cycling Data\OA-20 (Mesenchymal Stem Cells) Cycling Data Summary.csv	B11g5	hsa-miR-601	Target	MSC5		28.303	28.303
F:\OpenArray\Cycling Data\OA-20 (Mesenchymal Stem Cells) Cycling Data Summary.csv	C9f6	hsa-miR-191	Target	MSC14		15.272	15.272
F:\OpenArray\Cycling Data\OA-20 (Mesenchymal Stem Cells) Cycling Data Summary.csv	C5f6	hsa-miR-191	Target	MSC13		15.047	15.047
F:\OpenArray\Cycling Data\OA-20 (Mesenchymal Stem Cells) Cycling Data Summary.csv	C5f6	hsa-miR-191	Target	MSC19		14.788	14.788
F:\OpenArray\Cycling Data\OA-20 (Mesenchymal Stem Cells) Cycling Data Summary.csv	C1f6	hsa-miR-191	Target	MSC18		16.24	16.24
F:\OpenArray\Cycling Data\OA-20 (Mesenchymal Stem Cells) Cycling Data Summary.csv	C9f6	hsa-miR-191	Target	MSC17		14.97	14.97
F:\OpenArray\Cycling Data\OA-20 (Mesenchymal Stem Cells) Cycling Data Summary.csv	C1f6	hsa-miR-191	Target	MSC21		13.448	13.448
F:\OpenArray\Cycling Data\OA-20 (Mesenchymal Stem Cells) Cycling Data Summary.csv	C9f6	hsa-miR-191	Target	MSC20		15.212	15.212
F:\OpenArray\Cycling Data\OA-20 (Mesenchymal Stem Cells) Cycling Data Summary.csv	C9f6	hsa-miR-191	Target	MSC23		15.34	15.34
F:\OpenArray\Cycling Data\OA-20 (Mesenchymal Stem Cells) Cycling Data Summary.csv	C5f6	hsa-miR-191	Target	MSC22		14.211	14.211
F:\OpenArray\Cycling Data\OA-20 (Mesenchymal Stem Cells) Cycling Data Summary.csv	C5f6	hsa-miR-191	Target	MSC25		14.32	14.32
F:\OpenArray\Cycling Data\OA-20 (Mesenchymal Stem Cells) Cycling Data Summary.csv	B12f8	hsa-miR-550	Target	MSC29		29.05	29.05
F:\OpenArray\Cycling Data\OA-20 (Mesenchymal Stem Cells) Cycling Data Summary.csv	C1f6	hsa-miR-191	Target	MSC24		13.578	13.578
F:\OpenArray\Cycling Data\OA-20 (Mesenchymal Stem Cells) Cycling Data Summary.csv	C1f6	hsa-miR-191	Target	MSC27		14.639	14.639
F:\OpenArray\Cycling Data\OA-20 (Mesenchymal Stem Cells) Cycling Data Summary.csv	B8f8	hsa-miR-550	Target	MSC28		28.206	28.206
F:\OpenArray\Cycling Data\OA-20 (Mesenchymal Stem Cells) Cycling Data Summary.csv	C9f6	hsa-miR-191	Target	MSC26		16.171	16.171
F:\OpenArray\Cycling Data\OA-20 (Mesenchymal Stem Cells) Cycling Data Summary.csv	B4f8	hsa-miR-550	Target	MSC27		28.037	28.037
F:\OpenArray\Cycling Data\OA-20 (Mesenchymal Stem Cells) Cycling Data Summary.csv	C9f6	hsa-miR-191	Target	MSC29		12.408	12.408
F:\OpenArray\Cycling Data\OA-20 (Mesenchymal Stem Cells) Cycling Data Summary.csv	D7e6	hsa-miR-622	Target	MSC13		28.298	28.298
F:\OpenArray\Cycling Data\OA-20 (Mesenchymal Stem Cells) Cycling Data Summary.csv	C5f6	hsa-miR-191	Target	MSC28		14.121	14.121
F:\OpenArray\Cycling Data\OA-20 (Mesenchymal Stem Cells) Cycling Data Summary.csv	D7e6	hsa-miR-622	Target	MSC22		28.68	28.68
F:\OpenArray\Cycling Data\OA-20 (Mesenchymal Stem Cells) Cycling Data Summary.csv	D3e6	hsa-miR-622	Target	MSC27		30.094	30
[truncated: 7,693 more rows]

## Sheet: Average CT
DataAssist Software v3.0
Study: Mesenchymal
Description: Mesenchymal Stem Cells
Maximum allowable CT value: 30.0
Include max CT values in calculations: Yes
Exclude outliers among replicates: Yes
Adjust p-values using Benjamini-Hochberg False Discovery Rate: No
Normalization method: Endogenous Control
Selected controls: RNU48
Reference sample: MSC1
Assay	Type	MSC1 (CT)	MSC1 (STDEV)	MSC10 (CT)	MSC10 (STDEV)	MSC11 (CT)	MSC11 (STDEV)	MSC12 (CT)	MSC12 (STDEV)	MSC13 (CT)	MSC13 (STDEV)	MSC14 (CT)	MSC14 (STDEV)	MSC15 (CT)	MSC15 (STDEV)	MSC16 (CT)	MSC16 (STDEV)	MSC17 (CT)	MSC17 (STDEV)	MSC18 (CT)	MSC18 (STDEV)	MSC19 (CT)	MSC19 (STDEV)	MSC2 (CT)	MSC2 (STDEV)	MSC20 (CT)	MSC20 (STDEV)	MSC21 (CT)	MSC21 (STDEV)	MSC22 (CT)	MSC22 (STDEV)	MSC23 (CT)	MSC23 (STDEV)	MSC24 (CT)	MSC24 (STDEV)	MSC25 (CT)	MSC25 (STDEV)	MSC26 (CT)	MSC26 (STDEV)	MSC27 (CT)	MSC27 (STDEV)	MSC28 (CT)	MSC28 (STDEV)	MSC29 (CT)	MSC29 (STDEV)	MSC3 (CT)	MSC3 (STDEV)	MSC4 (CT)	MSC4 (STDEV)
ath-miR159a	Candidate Control																							25.4045	1.1968							27.784	0					27.579	0
dme-miR-7	Candidate Control			27.65	0													26.583	0	27.758	0	26.38	0	28.273	0			27.072	0	25.109	0											25.754	0	26.055	0			27.948	0
hsa-let-7a	Target			16.523	0	16.979	0	19.307	0	19.248	0	17.156	0	15.676	0	16.047	0	16.713	0	21.59	0	17.487	0	17.855	0	18.513	0	16.124	0	16.394	0	17.834	0	16.065	0	16.003	0	18.423	0	15.416	0	15.839	0	15.317	0
hsa-let-7a#	Target													28.806	0
hsa-let-7b	Target													13.813	0	14.575	0	14.866	0							14.562	0			13.956	0											13.634	0	13.46	0
hsa-let-7c	Target			20.242	0	20.862	0	21.344	0	21.325	0	20.12	0	18.409	0	19.287	0	20.194	0	21.799	0	19.712	0	20.245	0	19.62	0	19.416	0	19.964	0	21.155	0	19.36	0	19.838	0	21.574	0	19.082	0	18.526	0	18.242	0	18.37	0	19.516	0
hsa-let-7d	Target			18.64	0	18.912	0	20.596	0	19.615	0	18.766	0	18.319	0	17.946	0	18.62	0	20.708	0	18.629	0	20.557	0	18.681	0	18.398	0	17.989	0	20.448	0	18.462	0	18.314	0	21.301	0	18.376	0	17.789	0	16.955	0	18.907	0	19.789	0
hsa-let-7e	Target			14.457	0	14.891	0	15.023	0	14.435	0	13.423	0	13.59	0	13.705	0	14.752	0	14.299	0	13.773	0	14.435	0	14.057	0	13.239	0	14.184	0	14.789	0	13.252	0	14.261	0	15.033	0	14.121	0	13.897	0	13.119	0			14.508	0
hsa-let-7e#	Target											30	0					28.111	0							28.107	0	30	0	26.356	0			30	0	30	0			30	0	29.57	0	30	0	30	0
hsa-let-7f	Target			21.153	0	21.058	0	21.789	0	21.063	0	20.876	0	20.761	0	20.773	0	21.489	0	23.21	0	20.064	0	22.347	0	20.433	0	20.496	0	20.072	0	21.953	0	20.523	0	20.372	0	22.387	0	20.288	0	19.968	0	19.336	0			22.353	0
hsa-let-7f-1#	Target																					30	0
hsa-let-7f-2#	Target			30	0	28.383	0			27.293	0					30	0	28.649	0					30	0	28.301	0	30	0	28.85	0	30	0							29.6	0	28.942	0	28.907	0
hsa-let-7g	Target			18.073	0	18.031	0	19.07	0	17.668	0	17.879	0	17.646	0	17.31	0	17.028	0	19.188	0	17.743	0	18.3	0	17.527	0	16.585	0	16.602	0	19.651	0	17.498	0	18.107	0	20.323	0	18.134	0	17.434	0	15.913	0	17.784	0	17.915	0
hsa-let-7g#	Target																							29.961	0									30	0
hsa-miR-100	Target			13.22	0	13.209	0	14.345	0	14.064	0	13.73	0	12.205	0	13.093	0	13.83	0	15.244	0	12.934	0	13.674	0	13.047	0	12.34	0	11.975	0	14.241	0	12.414	0	12.207	0	15.241	0	11.78	0	11.474	0	10.788	0	12.361	0	13.277	0
hsa-miR-100#	Target			27.778	0	28.96	0					29.226	0	28.327	0	28.912	0	25.665	0					24.1	0			25.54	0	23.486	0			26.821	0	27.077	0			27.922	0	26.285	0	26.321	0	25.152	0	24.627	0
hsa-miR-101	Target			25.708	0	26.216	0	26.906	0	26.803	0	27.647	0	26.359	0	26.574	0	25.275	0			27.472	0	24.636	0	27.735	0	22.65	0	21.805	0			26.766	0	28.416	0			25.193	0	24.779	0	23.581	0	22.778	0	23.976	0
hsa-miR-101#	Target																									30	0	30	0
hsa-miR-103	Target			19.099	0	19.443	0	21.117	0	20.197	0	20.111	0	19.005	0	18.806	0	19.548	0	21.177	0	19.318	0	20.066	0	19.22	0	17.903	0	17.766	0	21.209	0	18.692	0	18.415	0	21.478	0	18.538	0	17.603	0	16.705	0	18.391	0	19.155	0
hsa-miR-106a	Target	27.655	0	17.369	0	17.384	0	18.353	0	17.269	0	17.519	0	17.155	0	16.438	0	16.177	0	18.886	0	17.339	0	15.914	0	17.961	0	14.541	0	14.37	0	16.826	0	16.069	0	17.078	0	18.828	0	14.564	0	14.921	0	13.604	0	15.873	0	16.007	0
hsa-miR-106b	Target			19.86	0	19.658	0	19.497	0	18.507	0	19.714	0	19.637	0	18.69	0	17.588	0	22.142	0	19.123	0	19.856	0	19.389	0	17.693	0	17.127	0	22.501	0	19.718	0	19.316	0	24.142	0	18.501	0	17.784	0	16.782	0	17.766	0	18.772	0
hsa-miR-106b#	Target			22.697	0	23.129	0	23.947	0	22.424	0	22.961	0	22.602	0	21.759	0	22.689	0	25.094	0	22.692	0	23.315	0	22.949	0	22.182	0	21.529	0	30	0	22.653	0	23.023	0	25.674	0	22.614	0	21.46	0	21.026	0			22.595	0
hsa-miR-107	Target			24.397	0	24.085	0	23.945	0	22.932	0	23.542	0	23.003	0	22.354	0	22.077	0	25.065	0	23.491	0	26.834	0	23.565	0	22.857	0	22.963	0	26.287	0	24.46	0	23.532	0			22.8	0	22.069	0	22.047	0	23.405	0
hsa-miR-10a	Target			24.639	0	23.612	0	22.378	0					20.895	0	21.473	0	21.107	0	26.191	0	23.56	0	24.59	0	22.536	0	25.272	0	24.83	0	26.457	0	28.476	0					20.311	0	19.691	0	18.338	0	21.412	0	23.259	0
hsa-miR-10a#	Target																	29.431	0																									29.648	0
hsa-miR-10b	Target			19.523	0	18.688	0	18.37	0	16.953	0	18.253	0	18.174	0	17.819	0	17.173	0	24.24	0	19.39	0	18.813	0	18.419	0	16.673	0	16.95	0	21.04	0	19.184	0	19.658	0	26.895	0	16.736	0	16.051	0	15.051	0	17.242	0	18.176	0
hsa-miR-10b#	Target	27.8	0	21.591	0	21.684	0	21.633	0	20.889	0	20.439	0	21.464	0	20.474	0	22.305	0	23.018	0	22.292	0	19.872	0	22.02	0	18.398	0	19.14	0	22.659	0	20.361	0	20.88	0	22.974	0	19.61	0	18.517	0	17.523	0	19.659	0	19.965	0
HSA-MIR-1179	Target									30	0	30	0									29.724	0			30	0	27.709	0	30	0			30	0	29.747	0			29.591	0	30	0	30	0	30	0	29.366	0
HSA-MIR-1180	Target			23.934	0	26.761	0	23.386	0	23.139	0	24.992	0	24.682	0	23.332	0	23.841	0	27.547	0	25.485	0	24.755	0	24.414	0	25.184	0	22.868	0	27.638	0	24.357	0	23.477	0			23.295	0	22.26	0	21.988	0	23.671	0	24.387	0
HSA-MIR-1183	Target									25.027	0																			23.659	0			25.441	0											25.354	0
HSA-MIR-1184	Target			27.154	0	28.037	0																													28.537	0			28.023	0	27.092	0	26.385	0
HSA-MIR-1201	Target			24.401	0	24.138	0	29.37	0	26.567	0	24.587	0	24.369	0	25.004	0	26.67	0	27.146	0			23.921	0	23.157	0	23.301	0	21.175	0	23.263	0	22.863	0	22.609	0	24.998	0	23.329	0	21.586	0	20.985	0	23.58	0
HSA-MIR-1208	Target							27.269	0													25.902	0					26.592	0
hsa-miR-122	Target			23.503	0			22.352	0																							25.183	0	22.847	0											22.619	0
HSA-MIR-1225-3P	Target									29.999	0					28.152	0											29.803	0
HSA-MIR-1226#	Target			26.14	0	29.568	0					26.634	0	29.957	0	25.91	0							29.234	0	29.079	0	24.693	0	24.986	0			25.307	0					29.359	0
HSA-MIR-1227	Target			26.175	0	26.163	0			27.837	0	27.459	0	25.628	0	28.641	0	27.498	0	29.059	0			23.793	0	25.368	0	24.694	0	24.918	0	28.178	0	25.601	0	25.726	0	27.213	0	25.377	0	24.696	0	24.376	0	24.393	0	24.732	0
HSA-MIR-1233	Target							25.624	0							22.827	0			25.208	0							21.348	0
HSA-MIR-1243	Target							30	0
HSA-MIR-1244	Target			27.669	0	27.384	0	28.246	0	28.103	0							27.292	0					27.116	0	26.849	0	25.902	0	24.425	0	25.746	0			26.195	0	28.589	0	30	0	26.094	0	26.434	0	27.209	0	25.25	0
HSA-MIR-1247	Target			23.004	0	21.784	0			25.386	0	23.383	0			24.745	0	22.975	0	27.507	0	26.4	0	24.06	0			24.75	0	23.171	0	27.251	0	23.728	0			26.367	0					21.73	0	23.4	0	24.287	0
HSA-MIR-1248	Target			28.574	0																			28.37	0					26.31	0					30	0			30	0	28.4	0	28.979	0	29.811	0	28.257	0
HSA-MIR-1249	Target							29.634	0
HSA-MIR-1250	Target
HSA-MIR-1254	Target			24.571	0	30	0	25.871	0	24.633	0	25.392	0	30	0	24.664	0	30	0	26.547	0					30	0	23.766	0	30	0	29.722	0	30	0	30	0	27.817	0	26.083	0	30	0	30	0	30	0	24.645	0
HSA-MIR-1255A	Target											30	0									28.242	0
HSA-MIR-1255B	Target			25.973	0	26.07	0			25.693	0	26.926	0	26.393	0	24.582	0	24.807	0			27.385	0	26.114	0	26.275	0	27.81	0	28.859	0	27.843	0	25.951	0	25.564	0	30	0	25.972	0	24.515	0	24.257	0	26.442	0	25.259	0
HSA-MIR-1256	Target															29.753	0															30	0									30	0
hsa-miR-125a-3p	Target							26.143	0	26.374	0			26.533	0	26.534	0	26.219	0	27.344	0	26.526	0	25.959	0	26.863	0	24.722	0	25.234	0	29.339	0	26.326	0	25.598	0	28.117	0	25.707	0	27.062	0	25.211	0
hsa-miR-125a-5p	Target	26.893	0	19.379	0	18.633	0	18.278	0	16.78	0	18.908	0	17.798	0	17.175	0	18.253	0	15.477	0	17.52	0	17.817	0	17.229	0	17.165	0	17.975	0	17.907	0	17.037	0	17.841	0	18.433	0	17.457	0	17.395	0	15.251	0	18.546	0	19.762	0
hsa-miR-125b	Target			13.425	0	13.62	0	13.169	0	12.247	0	13.035	0	12.41	0	12.603	0	12.656	0	15.027	0	12.362	0	14.566	0	12.431	0	13.198	0	12.943	0	15.586	0	13.778	0	12.719	0	16.52	0	12.598	0	12.253	0	11.55	0	12.577	0	13.945	0
hsa-miR-125b-1#	Target			23.581	0	24.905	0	24.238	0	23.998	0	23.535	0	23.039	0	23.686	0	23.413	0	27.55	0	24.193	0	22.318	0	24.204	0	22.447	0	21.293	0	27.084	0	22.386	0	23.259	0	26.703	0	23.037	0	22.318	0	22.055	0	22.484	0	22.379	0
hsa-miR-125b-2#	Target																							29.863	0
hsa-miR-126	Target	30	0	23.17	0	23.251	0	22.851	0	22.045	0	22.767	0	21.003	0	21.599	0	22.821	0	23.671	0	21.534	0	20.654	0	23.533	0	18.819	0	20.621	0	22.169	0	19.538	0	20.93	0	24.26	0	19.546	0	19.639	0	17.701	0	19.597	0	21.46	0
hsa-miR-126#	Target			25.842	0	26.637	0	30	0	28.732	0	26.724	0	27.473	0	29.836	0					30	0	26.947	0			24.89	0	24.004	0			24.982	0	25.572	0			24.254	0	24.172	0	22.572	0	25.426	0	27.368	0
HSA-MIR-1260	Target	28.129	0	20.288	0	21.695	0	23.986	0	22.848	0	22.415	0	21.892	0	21.888	0	23.198	0	22.949	0	22.963	0	17.371	0	19.867	0	16.472	0	16.977	0	20.992	0	19.675	0	18.98	0	20.679	0	20.007	0	19.259	0	18.813	0	18.907	0	19.735	0
HSA-MIR-1262	Target																					28.293	0					28.645	0			29.128	0									27.423	0
HSA-MIR-1267	Target			26.966	0	27.115	0							25.578	0	24.277	0	23.119	0					27.49	0	23.021	0	27.883	0	24.431	0									21.17	0	20.832	0	21.974	0
HSA-MIR-1269	Target																	27.868	0			29.402	0													27.707	0					27.813	0					27.241	0
hsa-miR-127	Target			16.645	0	17.713	0	21.411	0	21.64	0	19.805	0	16.938	0	18.655	0	19.354	0	20.87	0	17.861	0	17.84	0	18.162	0	16.151	0	15.711	0	20.231	0	16.379	0	16.129	0	20.086	0	17.023	0	16.113	0	15.259	0	17.919	0	17.226	0
hsa-miR-127-5p	Target			26.584	0							29.079	0			26.892	0					27.446	0	27.012	0			28.346	0	25.772	0					27.453	0							28.565	0
HSA-MIR-1270	Target					25.051	0					25.086	0	25.024	0	24.231	0			27.172	0			26.573	0			25.176	0			30	0	24.356	0			27.556	0							24.837	0
HSA-MIR-1271	Target			25.642	0	23.828	0	22.919	0	23.784	0	22.935	0	22.384	0	22.587	0	23.603	0	23.486	0	23.987	0	22.598	0	23.143	0	22.91	0	22.311	0	26.328	0	21.666	0	22.667	0	23.526	0	22.879	0	23.253	0	21.326	0	23.005	0	22.561	0
HSA-MIR-1274A	Target			14.637	0	16.877	0	16.207	0	15.593	0	16.051	0	15.685	0	15.575	0	17.467	0	18.172	0	15.737	0	11.739	0	15.233	0	11.954	0	11.126	0	16.044	0	14.858	0	13.849	0	14.95	0	15.043	0	13.955	0	13.281	0	14.514	0	14.623	0
HSA-MIR-1274B	Target	22.836	0	14.684	0	15.228	0	13.504	0	13.48	0	14.246	0	13.687	0	11.978	0	13.096	0	15.289	0	12.387	0	10.37	0	12.89	0	11.524	0	10.54	0	14.494	0	14.685	0	12.801	0	13.347	0	14.337	0	12.409	0	11.58	0	12.143	0	12.215	0
HSA-MIR-1275	Target			20.641	0	20.328	0	20.108	0	20.167	0	20.148	0	19.83	0	19.181	0	19.507	0	19.97	0	18.384	0	20.47	0	19.165	0	19.867	0	17.999	0	20.379	0	18.995	0	19.268	0	20.127	0	18.547	0	18.74	0	18.581	0	20.381	0	20.814	0
HSA-MIR-1276	Target							28.712	0											29.972	0
HSA-MIR-1282	Target									30	0	30	0															26.394	0											30	0
HSA-MIR-1285	Target																																					30	0
HSA-MIR-1289	Target							29.971	0
hsa-miR-128a	Target			22.267	0	23.589	0	25.6	0	24.292	0	23.341	0	22.673	0	22.487	0	22.708	0	26.285	0	23.191	0	24.329	0	23.585	0	22.198	0	22.688	0	26.393	0	23.092	0	23.085	0	26.777	0	21.979	0	21.844	0	21.449	0	22.934	0	23.109	0
hsa-miR-129	Target																											26.319	0
hsa-miR-129#	Target			30	0			29.044	0			30	0									28.501	0			29.145	0	27.418	0	26.63	0													29.619	0
HSA-MIR-1290	Target	28.767	0	25.903	0	27.4	0	26.62	0	28.518	0	27.992	0	30	0			28.585	0	27.765	0			25.201	0	26.738	0	26.449	0	24.2	0	25.347	0	26.873	0			24.497	0					28.393	0	25.29	0	22.869	0
HSA-MIR-1291	Target			25.059	0	25.855	0	26.992	0	26.834	0	26.205	0	28.755	0	27.76	0	29.012	0			28.357	0			27.027	0	25.88	0	24.272	0			25.023	0	26.023	0	28.372	0	25.295	0	25.716	0	24.585	0	26.107	0	24.446	0
HSA-MIR-1293	Target
HSA-MIR-1300	Target							27.681	0	30	0			27.624	0	26.614	0			30	0	28.358	0	26.151	0	27.186	0	26.998	0	24.367	0	29.7	0	26.021	0	28.839	0					26.559	0	28.349	0	29.258	0	25.391	0
HSA-MIR-1303	Target																							26.569	0	27.115	0	25.75	0															24.678	0
HSA-MIR-1305	Target																											30	0
hsa-miR-130a	Target			19.601	0	20.197	0	21.48	0	20.653	0	19.727	0	19.708	0	19.352	0	17.595	0	25.226	0	20.448	0	19.764	0	20.403	0	17.001	0	16.004	0	24.249	0	19.901	0	18.946	0	24.115	0	18.468	0	17.479	0	16.771	0	17.409	0	18.294	0
hsa-miR-130b	Target			21.387	0	21.246	0	26.102	0	27.788	0	23.34	0	21.206	0	21.895	0	23.435	0	25.932	0	22.463	0	22.436	0	22.958	0	20.547	0	19.676	0	26.444	0	20.885	0	20.673	0	24.392	0	19.909	0	19.372	0	18.556	0	20.619	0	20.445	0
hsa-miR-130b#	Target					23.424	0	23.84	0															23.81	0									22.297	0			25.001	0
hsa-miR-132	Target			17.485	0	18.505	0							16.831	0	18.966	0	21.248	0	22.227	0	18.467	0	19.034	0	19.18	0	16.482	0	16.494	0	19.812	0	16.517	0	16.507	0	19.333	0	17.139	0	15.804	0	15.123	0	17.563	0	18.637	0
hsa-miR-132#	Target																													28.511	0
HSA-MIR-1324	Target													27.538	0
hsa-miR-133a	Target			23.932	0	23.608	0	27.512	0			26.013	0	23.241	0	23.098	0					22.518	0	23.319	0	23.664	0	24.08	0			24.699	0	20.61	0	22.351	0	24.529	0			21.026	0	20.826	0	22.269	0	23.975	0
hsa-miR-135a	Target																													27.953	0			28.669	0
hsa-miR-135b	Target					26.563	0	27.426	0			28.421	0	25.67	0							30	0	26.836	0			25.507	0	29.699	0			26.352	0	29.056	0							26.982	0	24.762	0	24.649	0
hsa-miR-136	Target																							27.535	0			26.405	0																	26.828	0	27.644	0
hsa-miR-136#	Target			24.215	0	24.673	0	28.084	0	25.299	0	24.615	0	26.529	0	25.428	0	24.187	0	28.889	0	25.273	0	23.289	0	24.518	0	21.814	0	20.147	0			25.438	0	24.223	0	27.755	0	25.86	0	23.417	0	22.721	0	22.091	0	22.812	0
hsa-miR-138	Target	26.797	0	19.783	0	18.772	0	19.343	0	19.309	0	21.086	0	17.566	0	18.413	0	19.152	0	20.285	0	18.593	0	19.472	0	19.459	0	16.25	0	16.541	0	19.673	0	17.017	0	18.022	0	20.505	0	17.278	0	18.659	0	18.209	0	17.36	0	17.782	0
hsa-miR-139-5p	Target			24.636	0	26.071	0	27.229	0	28.489	0	26.675	0	23.126	0	25.377	0	29.281	0	25.777	0	26.017	0	25.42	0	26.556	0	22.808	0	23.522	0	25.132	0	22.412	0	23.759	0	26.112	0	23.821	0	23.712	0	23.22	0	23.967	0	25.085	0
hsa-miR-140-3p	Target	30	0					26.158	0			25.148	0	21.209	0	22.826	0	24.177	0	23.196	0	23.02	0	21.588	0	23.073	0	19.685	0	21.448	0	24.231	0	21.397	0	23.277	0	25.271	0	23.014	0	22.1	0	20.264	0
hsa-miR-141	Target											27.581	0	27.254	0											28.933	0	26.357	0	26.861	0															24.712	0	27.448	0
hsa-miR-142-3p	Target			26.787	0	28.854	0							27.479	0	28.696	0	24.482	0									26.496	0	26.023	0															23.965	0	27.521	0
hsa-miR-142-5p	Target																																															30	0
hsa-miR-143	Target			17.351	0	18.834	0	20.616	0	18.497	0	19.444	0	19.086	0	19.11	0	16.826	0	22.511	0	17.728	0	19.427	0	18.262	0	16.422	0	15.249	0	24.891	0	17.305	0	17.051	0	23.046	0	17.321	0	16.586	0	15.59	0	18.814	0	19.549	0
hsa-miR-144#	Target																	29.193	0											29.245	0
hsa-miR-145	Target	29.716	0	14.099	0	15.279	0	16.975	0	17.981	0	16.597	0	14.891	0	16.168	0	16.653	0	16.233	0	13.663	0	16.953	0	13.673	0	14.537	0	14.518	0	20.325	0	12.938	0	13.088	0	17.238	0	13.678	0	13.803	0	13.114	0	18.939	0
hsa-miR-145#	Target			25.277	0			26.548	0	25.265	0	26.896	0	30	0	26.957	0	24.728	0	30	0	23.857	0	27.664	0	23.636	0	26.325	0	23.679	0	30	0	25.78	0	24.786	0			28.256	0	23.848	0	24.048	0	30	0
hsa-miR-146a	Target	25.324	0	17.191	0	15.814	0	22.467	0	20.602	0	17.435	0	16.797	0	16.193	0	16.623	0	22.358	0	20.344	0	16.629	0	18.97	0	14.296	0	14.532	0	15.358	0	17.081	0	16.142	0	17.784	0	19.373	0	17.239	0	13.473	0	18.56	0	20.902	0
hsa-miR-146b	Target	28.387	0	20.558	0	19.519	0	20.85	0	19.387	0	19.556	0	19.362	0	18.687	0	18.644	0	21.88	0	20.618	0	19.462	0	20.518	0	18.92	0	19.143	0	21.17	0	19.922	0	20.552	0	22.18	0	20.355	0	18.781	0	16.149	0	17.393	0	18.792	0
hsa-miR-146b-3p	Target																																			30	0							26.953	0	25.561	0	27.725	0
hsa-miR-148a	Target			20.64	0	20.669	0	20.015	0	18.97	0	19.846	0	20.341	0	20.055	0	18.98	0	23.121	0	19.235	0	21.845	0	19.602	0	19.311	0	18.843	0	24.561	0	20.482	0	20.454	0	24.063	0	20.505	0	19.653	0	18.242	0	19.715	0	20.52	0
hsa-miR-148b	Target			23.551	0	23.979	0	26.608	0	27.5	0	24.788	0	23.104	0	24.813	0	24.539	0	26.598	0	24.255	0	23.998	0	25.691	0	22.618	0	22.151	0	26.677	0	22.929	0	23.9	0	25.873	0	22.927	0	21.805	0	20.592	0	21.736	0	23.184	0
hsa-miR-148b#	Target			30	0	29.063	0	28.539	0	27.542	0	26.885	0	30	0	27.751	0	26.798	0			28.327	0	26.113	0	27.921	0	25.56	0	25.679	0			27.438	0	28.024	0			29.836	0	27.75	0	25.218	0	25.307	0	26.642	0
hsa-miR-149	Target	28.884	0	19.491	0	19.529	0	18.248	0	17.196	0	19.016	0	17.779	0	17.421	0	19.035	0	17.513	0	17.338	0	20.236	0	17.429	0	18.753	0	19.127	0	21.244	0	16.833	0	18.331	0	21.2	0	17.901	0	17.466	0	16.819	0	19.899	0	19.557	0
hsa-miR-150	Target			25.186	0	25.518	0	29.917	0	30	0	29.555	0	24.147	0	27.787	0	27.184	0	25.081	0	25.906	0			27.419	0	24.518	0	25.805	0	24.261	0	22.568	0	23.792	0	28.179	0	24.328	0	24.421	0	24.883	0	23.332	0	24.906	0
hsa-miR-151-3p	Target			21.228	0	22.167	0	21.133	0	21.683	0	20.088	0			22.408	0	20.025	0	23.493	0	21.795	0	20.4	0	21.106	0	18.423	0	19.202	0	22.531	0	21.799	0	22.869	0	22.912	0	21.849	0	20.636	0	19.379	0	21.106	0	19.84	0
HSA-MIR-151-5P	Target			21.646	0	22.042	0	22.177	0	22.006	0	21.508	0	22.597	0	21.243	0	21.629	0	24.298	0	21.832	0	22.314	0	22.339	0	22.178	0	20.404	0	24.402	0	21.81	0	21.206	0	24.248	0	21.722	0	20.419	0	19.656	0	21.774	0	23.201	0
hsa-miR-152	Target			17.313	0	17.376	0	18.956	0	17.616	0	17.643	0	16.182	0	16.38	0	16.748	0	22.081	0	17.149	0	18.021	0	17.896	0	15.822	0	16.216	0	20.673	0	16.123	0	16.609	0	20.402	0	16.346	0	16.011	0	14.817	0	15.68	0	16.616	0
hsa-miR-154	Target											27.735	0			26.982	0	28.684	0					26.817	0	27.602	0	24.672	0	23.895	0											24.639	0	23.943	0	25.636	0	25.959	0
hsa-miR-154#	Target			27.023	0	27.076	0	26.482	0	26.161	0	26.963	0	26.117	0	26.834	0	26.649	0			25.315	0	25.738	0	25.835	0	26.108	0	23.709	0			26.213	0	26.583	0			26.793	0	24.031	0	24.129	0	26.047	0	27.371	0
hsa-miR-155	Target	27.934	0	19.259	0	18.467	0	18.303	0	16.343	0	17.851	0	16.606	0	15.312	0	15.757	0	19.394	0	19.554	0	17.987	0	20.451	0	18.682	0	18.97	0	20.699	0	18.743	0	20.318	0	21.761	0	17.977	0	17.944	0	16.345	0	16.659	0	17.581	0
hsa-miR-155#	Target																													30	0
hsa-miR-15a	Target			23.265	0	23.077	0	27.633	0	28.318	0	25.463	0	23.058	0	23.937	0	24.122	0			24.09	0	22.514	0	25.388	0	20.819	0	20.887	0	26.214	0	22.842	0	23.746	0			22.096	0	21.176	0	19.672	0	20.125	0	21.877	0
hsa-miR-15a#	Target			29.734	0					26.835	0	28.694	0											26.644	0			26.213	0	25.874	0	30	0									25.639	0	26.596	0	26.723	0	30	0
hsa-miR-15b	Target			18.451	0	18.301	0	21.753	0	22.241	0	20.16	0	17.13	0	18.126	0	19.014	0	22.232	0	18.887	0	19.027	0	19.58	0	17.896	0	17.578	0	22.834	0	17.906	0	17.8	0	21.9	0	16.923	0	16.525	0	15.966	0	17.907	0	18.077	0
hsa-miR-15b#	Target			23.21	0	23.56	0	24.094	0	23.129	0	23.487	0	22.394	0	20.953	0	22.224	0			24.067	0			23.838	0	23.405	0	22.431	0													21.072	0			22.959	0
hsa-miR-16	Target	28.176	0	17.47	0	16.864	0	18.649	0	17.826	0	17.86	0	15.846	0	15.49	0	16.068	0	19.114	0	17.098	0	16.074	0	18.052	0	15.049	0	16.035	0	18.66	0	15.909	0	16.845	0	19.017	0	15.201	0	15.372	0	13.817	0	14.716	0	15.831	0
hsa-miR-16-1#	Target									27.618	0	26.804	0	27.136	0	26.687	0	27.506	0			26.154	0	24.432	0			25.029	0	23.473	0	28.205	0	27.271	0					27.552	0	25.37	0	24.492	0	24.255	0	25.143	0
hsa-miR-17	Target			17.476	0	17.447	0	17.935	0	16.821	0	17.502	0	17.352	0	16.295	0	15.672	0	18.473	0	16.968	0	16.422	0	17.51	0	14.728	0	14.648	0	17.241	0	16.345	0	16.917	0	19.304	0	15.357	0	14.927	0	13.818	0	17.141	0	16.276	0
hsa-miR-17#	Target															30	0	30	0									30	0	30	0	30	0	30	0									30	0			30	0
hsa-miR-181a	Target			20.296	0	21.035	0	24.669	0			22.515	0	19.996	0	22.233	0	22.184	0	24.63	0	21.021	0	20.071	0	21.361	0	17.524	0			21.251	0	20.117	0	19.327	0	23.088	0	19.414	0	18.823	0	17.356	0	19.65	0	19.676	0
hsa-miR-181a-2#	Target			24.04	0	24.802	0	24.053	0	24.442	0	23.972	0	22.179	0	22.788	0	24.332	0	23.565	0	23.141	0	23.274	0	22.562	0	21.359	0	21.107	0	23.315	0	21.826	0	22.124	0	23.824	0	22.281	0	21.913	0	20.603	0	23.42	0	22.731	0
hsa-miR-181c	Target			26.981	0	27.299	0	25.983	0	24.822	0	25.041	0					24.312	0	28.346	0							24.136	0					26.04	0					25.63	0			24.308	0	24.992	0
hsa-miR-181c#	Target					24.675	0											23.026	0									23.404	0																	23.511	0	23.678	0
hsa-miR-184	Target			26.724	0	28.036	0					30	0	25.761	0	28.171	0			28.029	0	28.895	0	27.853	0	30	0	24.088	0	23.434	0	27.539	0	25.503	0	25.628	0			26.905	0	26.417	0			27.293	0
hsa-miR-185	Target			21.147	0	21.464	0	23.798	0	21.887	0	21.36	0	20.607	0	20.005	0	19.877	0	24.421	0	21.392	0	21.809	0	21.333	0	20.114	0	19.782	0	23.187	0	20.194	0	20.243	0	24.228	0	20.072	0	19.633	0	18.566	0	20.553	0	21.366	0
hsa-miR-186	Target			21.017	0	20.356	0	21.185	0	19.298	0	20.07	0	19.059	0	19.146	0	19.583	0	19.775	0	20.675	0	18.57	0	19.368	0	16.332	0	18.101	0	22.171	0	18.485	0	19.972	0	22.082	0	19.546	0	19.457	0	15.78	0	18.23	0	18.804	0
hsa-miR-18a	Target			23.735	0	24.438	0	26.18	0	29.826	0	26.058	0	24.955	0	23.751	0	24.382	0	27.758	0	24.454	0	24.274	0	25.183	0	22.719	0	21.444	0	25.96	0	23.995	0	24.177	0	27.251	0	23.136	0	22.486	0	22.526	0	23.83	0	23.815	0
hsa-miR-18a#	Target					29.497	0	28.168	0	30	0	27.076	0	27.531	0	27.068	0	27.161	0	29.194	0	30	0	29.296	0	27.917	0	27.299	0	26.263	0			27.524	0	29.122	0	27.692	0	28.741	0	29.688	0	28.142	0			30	0
hsa-miR-190	Target			26.769	0	27.09	0	27.617	0	28.035	0	27.349	0			27.29	0	26.132	0					26.295	0			24.572	0	23.874	0									26.074	0	24.253	0	28.168	0	24.714	0	24.576	0
hsa-miR-190b	Target															28.213	0	28.633	0					26.875	0	27.286	0	28.454	0	27.452	0	28.608	0			29.289	0			28.358	0	29.095	0	26.658	0	28.888	0
hsa-miR-191	Target	19.509	0	15.165	0	15.088	0	16.411	0	15.047	0	15.272	0	13.516	0	13.12	0	14.97	0	16.24	0	14.788	0	14.955	0	15.212	0	13.448	0	14.211	0	15.34	0	13.578	0	14.32	0	16.171	0	14.639	0	14.121	0	12.408	0	14.332	0	14.521	0
HSA-MIR-191#	Target			30	0	30	0	29.047	0	29.703	0	30	0	29.105	0	27.978	0	30	0	30	0	30	0	27.866	0			27.06	0	26.872	0			29.308	0	29.194	0					26.538	0	27.78	0	29.007	0	30	0
hsa-miR-192	Target			23.774	0	24.382	0	30	0	26.909	0	24.847	0	23.855	0	24.868	0	26.527	0	26.757	0	24.206	0	25.096	0	25.463	0	22.73	0	22.755	0	24.739	0	22.789	0	23.392	0	26.288	0	25.169	0	22.494	0	21.088	0	21.672	0	23.173	0
hsa-miR-192#	Target					30	0							29.253	0															30	0					30	0			30	0	30	0	29.912	0
hsa-miR-193a-3p	Target			29.973	0	29.346	0	28.341	0			27.244	0	28.954	0	28.138	0	27.258	0	29.128	0			25.523	0			26.244	0	27.31	0	30	0	27.508	0	29.997	0	30	0	29.377	0	27.962	0	26.924	0	25.187	0	26.252	0
hsa-miR-193a-5p	Target			17.875	0	17.686	0	16.603	0	16.405	0	16.867	0	16.362	0	16.725	0	16.261	0	16.783	0	16.514	0	17.723	0	16.132	0	16.425	0	16.999	0	17.962	0	16.503	0	16.843	0	18.656	0	16.509	0	16.185	0	15.186	0	17.146	0	17.625	0
hsa-miR-193b	Target	23.828	0	15.385	0	14.836	0	15.089	0	13.765	0	14.782	0	13.844	0	14.379	0	14.143	0	13.753	0	13.834	0	14.777	0	13.811	0	13.448	0	13.755	0	15.625	0	13.595	0	14.165	0	15.634	0	14.616	0	14.013	0	13.193	0	13.714	0	14.809	0
hsa-miR-193b#	Target			22.555	0	22.859	0	21.948	0	21.769	0	21.842	0	21.55	0	21.617	0	22.669	0	20.988	0	21.205	0	22.425	0	21.319	0	21.125	0	21.73	0	21.923	0	20.68	0	21.702	0	21.815	0	21.926	0	21.173	0	21.12	0	21.977	0	22.973	0
hsa-miR-194	Target			25.025	0	25.507	0	24.624	0	23.839	0	24.123	0	24.5	0	23.875	0	23.723	0	26.046	0	22.61	0	25.471	0	22.938	0	23.966	0	23.755	0	25.269	0	23.243	0	24.668	0	26.259	0	23.896	0	23.466	0	22.403	0	23.603	0	24.659	0
hsa-miR-195	Target			19.249	0	19.249	0	19.903	0	18.434	0	20.227	0	18.842	0	18.716	0	18.372	0	20.489	0	17.799	0	20.675	0	17.554	0	18.485	0	18.528	0	22.573	0	19.544	0	19.265	0	23.844	0	20.098	0	19.312	0	18.078	0	18.443	0	20.215	0
hsa-miR-195#	Target																																													30	0
hsa-miR-196b	Target	29.028	0	21.812	0	21.718	0	21.116	0	20.269	0	20.985	0	21.089	0	20.321	0	20.749	0	20.318	0	20.132	0	20.105	0	20.779	0	19.141	0	20.123	0	23.214	0	19.05	0	20.529	0	22.972	0	20.061	0	19.915	0	18.283	0	19.2	0	20.697	0
hsa-miR-197	Target			20.187	0	20.283	0	19.539	0	19.36	0	19.611	0	17.982	0	19.007	0			17.167	0	19.019	0	19.575	0	19.587	0	17.416	0			19.582	0	17.116	0	19.195	0	20.242	0	18.503	0	19.58	0	18.398	0	18.892	0
hsa-miR-198	Target			24.886	0	24.776	0	26.133	0	26.13	0	26.081	0									24.352	0	24.163	0	24.893	0	24.667	0	24.602	0	26.602	0	25.171	0			28.066	0							24.837	0	25.208	0
hsa-miR-199a	Target			22.104	0	22.543	0	22.576	0	21.276	0	21.657	0	22.218	0	21.664	0	20.032	0	26.634	0	21.768	0	22.826	0	20.978	0	22.264	0	21.079	0	24.9	0	23.009	0	21.671	0	27.86	0	21.441	0	19.978	0	19.281	0	21.863	0	22.38	0
hsa-miR-199a-3p	Target			15.703	0	15.311	0	17.038	0	16.095	0	16.021	0	14.616	0	14.893	0	14.815	0	18.474	0	15.555	0	15.252	0	15.856	0	14.093	0	14.575	0	18.09	0	15.143	0	15.22	0	18.638	0	14.162	0	13.769	0	11.914	0	13.664	0	14.029	0
hsa-miR-199b	Target			24.687	0	23.354	0	25.151	0	22.934	0	23.844	0	23.062	0	22.946	0	20.844	0	29.605	0	24.602	0	23.586	0	23.161	0	25.221	0	23.173	0			25.875	0	24.742	0	28.176	0	23.667	0	22.614	0	21.149	0	22.212	0	22.785	0
hsa-miR-19a	Target			23.193	0	23.122	0	22.557	0	21.383	0	22.418	0	22.591	0	21.664	0	20.468	0	24.373	0	22.395	0	21.225	0	22.407	0	19.724	0	18.862	0	24.517	0	23.072	0	22.76	0	25.54	0	21.547	0	20.7	0	19.32	0	20.376	0	20.831	0
hsa-miR-19b	Target	27.399	0	16.464	0	16.619	0	18.086	0	16.142	0	16.865	0	15.815	0	15.234	0	14.928	0	19.839	0	16.581	0	15.543	0	16.474	0	13.584	0	13.187	0	17.221	0	16.055	0	16.012	0	19.155	0	14.515	0	13.841	0	12.766	0	14.227	0	14.916	0
hsa-miR-19b-1#	Target			27.669	0	29.264	0			29.226	0					29.04	0	28.757	0			29.977	0	26.481	0	28.767	0	28.298	0	25.845	0	30	0	30	0			30	0	27.901	0	26.303	0	27.493	0	28.267	0	27.48	0
hsa-miR-200a#	Target													29.624	0
hsa-miR-200b	Target											25.512	0					24.676	0	26.71	0			25.196	0			24.715	0			26.942	0											25.214	0
hsa-miR-200c	Target			23.746	0					23.111	0	23.768	0					30	0									23.399	0	22.885	0			22.889	0	23.719	0					23.355	0	21.973	0	23.625	0	23.993	0
hsa-miR-202	Target					28.253	0	28.495	0					28.957	0	29.035	0					27.002	0	29.182	0	26.947	0	27.914	0													27.607	0			25.877	0	27.344	0
hsa-miR-203	Target			24.476	0	25.445	0	28.978	0	27.075	0	27.949	0	22.693	0	24.234	0	24.997	0	27.341	0	24.186	0	25.065	0	24.112	0	26.69	0	26.803	0	27.229	0	22.272	0	21.78	0	24.957	0	20.897	0	20.203	0	18.989	0	22.235	0	25.309	0
hsa-miR-204	Target			20.319	0	20.149	0					22.942	0	15.861	0	17.298	0	19.593	0	23.393	0	20.543	0	23.942	0	21.493	0	15.137	0	17.011	0	24.075	0	18.11	0	18.453	0	21.703	0	17.386	0	17.16	0	16.12	0	20.073	0	19.757	0
hsa-miR-205	Target																									25.575	0															26.162	0
hsa-miR-206	Target			25.725	0			29.094	0	27.702	0			27.508	0	26.309	0	27.277	0			26.043	0	26.764	0	25.627	0	26.357	0	25.115	0	27.191	0	26.298	0	24.864	0			24.875	0	25.243	0	24.464	0	25.221	0	27.766	0
hsa-miR-208	Target																	27.204	0																							27.595	0
hsa-miR-20a	Target			18.66	0	18.185	0	17.325	0	16.454	0	17.16	0	17.849	0	16.715	0	15.637	0	19.524	0	17.013	0	17.724	0	17.401	0	16.081	0	15.678	0	18.05	0	17.866	0	17.895	0	20.537	0	16.358	0	15.887	0	14.772	0	17.186	0	17.605	0
hsa-miR-20a#	Target			27.988	0	28.069	0	27.982	0	28.942	0			28.077	0			25.452	0	28.225	0	28.279	0	26.09	0			24.373	0	23.475	0	30	0	27.091	0	27.333	0	27.229	0	26.209	0	25.211	0	24.494	0	26.387	0	29.017	0
hsa-miR-20b	Target			26.565	0	25.283	0	26.309	0	24.564	0	24.382	0	25.198	0	24.084	0	22.975	0	26.988	0	27.615	0	25.428	0	29.659	0	23.624	0	23.043	0	26.636	0	26.256	0	29.565	0	30	0	27.001	0	24.941	0	21.496	0	25.312	0	27.666	0
hsa-miR-21	Target			15.596	0	15.422	0	17.215	0	14.396	0	15.039	0	15.395	0	14.859	0	12.653	0	19.536	0	14.341	0	15.891	0	14.117	0	13.597	0	12.482	0	18.72	0	16.514	0			19.167	0	15.244	0	13.876	0	11.768	0	13.224	0	15.778	0
hsa-miR-21#	Target			26.631	0							27.268	0					26.459	0					25.369	0			23.792	0	22.865	0			28.453	0			28.737	0					25.025	0	24.841	0	23.728	0
hsa-miR-210	Target			19.927	0	20.231	0	19.063	0	21.137	0	21.181	0	17.424	0	19.557	0	20.292	0	17.628	0	18.621	0	16.281	0	19.598	0	15.025	0	17.696	0	20.123	0	15.681	0	18.733	0	22.271	0	16.122	0	18.618	0	17.487	0	15.299	0	17.734	0
hsa-miR-211	Target
hsa-miR-212	Target			21.309	0	21.946	0	23.339	0	22.399	0	22.64	0	20.721	0	20.969	0	21.665	0	22.416	0	20.734	0	22.531	0	20.712	0	19.591	0	19.266	0	24.493	0	20.127	0	19.696	0	22.439	0	20.45	0	18.906	0	18.734	0	20.653	0	21.556	0
hsa-miR-213	Target			27.451	0	28.824	0	27.074	0	24.849	0	25.468	0	25.822	0	24.471	0	24.29	0	28.335	0	24.205	0	24.998	0	24.891	0	24.809	0	23.822	0	26.764	0	25.284	0	24.798	0	30	0	26.142	0	23.868	0	23.451	0			26.282	0
hsa-miR-214	Target	24.165	0	16.729	0	16.346	0	16.475	0	15.31	0	16.126	0	14.136	0	15.158	0	15.102	0	16.501	0	15.31	0	15.963	0	15.153	0	14.64	0	15.619	0	17.583	0	14.904	0	15.672	0	18.88	0	15.207	0	14.36	0	13.075	0	16.174	0	15.091	0
hsa-miR-214#	Target			24.843	0	25.024	0	24.528	0	23.629	0	23.009	0	23.578	0	22.608	0	22.168	0	28.089	0	25.75	0	22.525	0	24.449	0	22.984	0	22.625	0	27.283	0	24.447	0	23.813	0	28.76	0	25.356	0	22.333	0	20.646	0	23.117	0	22.381	0
hsa-miR-215	Target									24.351	0	25.111	0			24.573	0							26.729	0			24.297	0			27.165	0
hsa-miR-216a	Target													27.576	0													25.382	0
hsa-miR-216b	Target					29.484	0							28.957	0																			27.543	0							27.238	0	26.104	0	28.237	0
hsa-miR-217	Target																					30	0					28.741	0	30	0					30	0					30	0	29.02	0
hsa-miR-218	Target			19.913	0	21.082	0			21.946	0	22.421	0	19.317	0	21.207	0	21.875	0			21.508	0	20.891	0	22.4	0	18.042	0	19.623	0	23.557	0	18.278	0	21.14	0	26.368	0			19.593	0	18.68	0	18.495	0	18.552	0
hsa-miR-218-2#	Target																											27.597	0																			28.458	0
hsa-miR-219	Target																													27.964	0
hsa-miR-219-1-3p	Target									30	0			29.664	0																	28.99	0
hsa-miR-22	Target			18.134	0	18.777	0	20.939	0	19.361	0	18.869	0	18.075	0	17.921	0	17.187	0			17.511	0	18.967	0	18.265	0	16.611	0	15.662	0	20.69	0	18.065	0	17.309	0			17.464	0	16.361	0	15.727	0	16.71	0	18.042	0
hsa-miR-22#	Target			24.36	0	24.323	0	23.376	0	23.701	0	24.052	0	22.022	0	22.712	0	22.542	0	25.215	0	23.262	0	22.195	0	23.8	0	21.992	0	20.909	0	25.088	0	22.188	0	23.126	0	25.83	0	21.615	0	21.509	0	21.058	0	21.688	0	21.596	0
hsa-miR-221	Target	30	0	14.469	0	14.65	0	14.384	0	13.653	0	14.201	0	13.855	0	13.8	0	13.711	0	16.477	0	13.963	0	15.857	0	13.842	0	14.173	0	13.705	0	16.851	0	14.227	0	13.703	0	17.77	0	13.441	0	13.342	0	13.155	0	16.172	0	14.814	0
hsa-miR-221#	Target			27.329	0	29.629	0	28.13	0			28.777	0			27.269	0	27.106	0			29.191	0	29.481	0	30	0	28.435	0	25.94	0			30	0	28.896	0					27.216	0	28.351	0	27.725	0	28.264	0
hsa-miR-222	Target	24.446	0	11.989	0	11.58	0	10.821	0	10.308	0	11.344	0	10.147	0	10.365	0	11.301	0	11.125	0	11.718	0	10.904	0	11.885	0			10.321	0	12.186	0	10.108	0	11.433	0	13.751	0	10.917	0	10.88	0					10.572	0
hsa-miR-222#	Target	29.301	0	23.821	0	23.933	0	23.236	0	21.762	0	23.066	0	22.182	0	21.864	0	20.728	0	24.348	0	22.914	0	18.811	0	22.919	0	18.34	0	18.159	0	24.298	0	21.982	0	22.765	0	24.51	0	22.347	0	21.623	0	20.532	0	20.794	0	20.033	0
hsa-miR-223	Target			22.631	0	23.66	0	24.485	0	24.829	0	23.61	0	22.446	0	23.174	0	25.904	0	24.042	0	23.271	0	29.941	0	24.379	0	22.248	0	27.776	0	24.187	0	20.861	0	23.474	0	25.205	0			23.464	0	23.562	0	21.607	0	25.217	0
hsa-miR-224	Target			18.5	0	19.471	0	21.349	0	20.63	0	21.304	0	19.442	0	20.673	0	21.855	0	22.049	0	20.073	0	21.453	0	20.683	0	19.021	0	19.387	0	22.144	0	18.652	0	18.383	0	21.321	0	18.778	0	17.952	0	16.928	0	20.86	0	21.728	0
hsa-miR-23a	Target											19.203	0
hsa-miR-23a#	Target									27.951	0															28.012	0			26.935	0	28.055	0			26.211	0			28.221	0	27.989	0	28.364	0
hsa-miR-23b	Target					20.01	0			19.574	0	19.66	0	19.615	0	17.997	0			22.878	0			20.814	0	18.292	0	19.302	0	19.32	0	21.78	0	21.192	0									18.808	0
hsa-miR-24	Target	21.617	0	12.611	0	12.389	0	13.725	0	12.157	0	13.034	0	11.53	0	11.623	0	12.293	0	14.076	0	11.619	0	11.606	0	12.108	0	9.98	0	10.416	0	13.579	0	11.659	0	11.684	0	14.752	0	11.882	0	11.636	0	10.133	0	10.05	0	11.612	0
hsa-miR-24-1#	Target																											26.561	0
hsa-miR-24-2#	Target			23.822	0	25.01	0	24.275	0	23.828	0	23.694	0	24.405	0	23.213	0	23.841	0	26.176	0	23.794	0	23.109	0	23.767	0	22.852	0	21.096	0	28.171	0	23.767	0	23.646	0	27.219	0	25.318	0	23.479	0	22.384	0	22.936	0	23.346	0
hsa-miR-25	Target			21.115	0	20.792	0	21.654	0	21.594	0	21.693	0	20.111	0	20.334	0	20.804	0	23.503	0	20.809	0	22.548	0	21.127	0	20.018	0	20.151	0	23.286	0	20.021	0	20.392	0	23.483	0			19.211	0	18.56	0	19.316	0	21.494	0
hsa-miR-25#	Target													26.511	0					26.94	0			27.179	0			25.025	0
hsa-miR-26a	Target			16.549	0	16.034	0	16.194	0	14.929	0	15.84	0	15.515	0	15.353	0	15.327	0	18.111	0	15.123	0	16.632	0	14.948	0	15.134	0	14.926	0	18.736	0	16.276	0	15.78	0	19.437	0	15.518	0	14.572	0	13.578	0	15.459	0	16.508	0
hsa-miR-26a-1#	Target			27.877	0	29.417	0	27.344	0	25.571	0	27.099	0	27.41	0	25.91	0	26.247	0	29.84	0			26.011	0	28.143	0	25.3	0	26.121	0	30	0	25.974	0	26.789	0			27.553	0	25.724	0	25.598	0	28.228	0	28.608	0
hsa-miR-26a-2#	Target			28.515	0			30	0	29.329	0			28.048	0	29.796	0	29.121	0			30	0			30	0	27.253	0					29.938	0	30	0			30	0	28.532	0	27.974	0
hsa-miR-26b	Target			18.78	0	18.755	0	19.37	0	17.605	0	18.618	0	17.744	0	17.601	0	18.84	0	21.005	0	17.692	0	19.282	0	17.533	0	17.543	0	17.655	0	20.681	0	18.655	0	18.351	0	21.654	0	17.963	0	17.587	0	15.998	0	17.771	0	18.699	0
hsa-miR-26b#	Target			30	0	30	0	28.905	0	27.153	0	27.441	0	29.263	0	26.967	0	27.331	0	30	0	30	0	29.599	0	29.651	0	27.653	0	27.211	0			27.588	0	28.552	0	30	0	29.147	0	26.425	0	26.159	0			30	0
hsa-miR-27a	Target			20.058	0	20.199	0	21.955	0	20.066	0	20.407	0	18.984	0	19.373	0	18.972	0	23.69	0	19.613	0	19.767	0	19.814	0	17.26	0	16.813	0	22.917	0	19.822	0	19.58	0	24.16	0	18.476	0	18.608	0	17.288	0	17.987	0	19.123	0
hsa-miR-27a#	Target			27.457	0	26.712	0	24.714	0	22.495	0	23.654	0	22.125	0	21.372	0	21.997	0	24.328	0	23.742	0	20.834	0	23.732	0	20.137	0	20.74	0	24.938	0	22.83	0	22.853	0	23.642	0	24.253	0	23.136	0	21.346	0	21.319	0	25.014	0
hsa-miR-27b	Target			19.651	0	19.859	0	19.692	0	18.493	0	19.408	0	18.507	0	18.456	0	17.296	0	22.355	0	18.164	0	20.236	0	18.454	0	18.093	0	17.24	0	23.308	0	20.133	0	19.217	0	25.385	0	19.225	0	18.202	0	17.89	0	18.324	0	19.347	0
hsa-miR-27b#	Target			23.413	0	23.708	0	22.106	0	21.824	0	22.992	0	21.73	0	21.363	0	23.407	0	23.856	0	21.491	0	20.702	0	22.16	0	20.471	0	20.743	0	25.477	0	21.701	0	22.602	0	24.795	0	23.337	0	21.9	0	21.866	0	20.11	0	21.643	0
hsa-miR-28	Target			19.387	0	19.778	0	20.895	0	19.285	0	20.333	0	18.996	0	18.76	0	18.755	0	21.248	0	18.705	0	20.719	0	18.587	0	18.334	0	17.987	0	21.516	0	18.863	0	18.57	0	22.511	0	18.234	0	17.775	0	16.834	0	20.729	0	20.014	0
hsa-miR-28-3p	Target	27.611	0	18.574	0	18.656	0	19.12	0	17.732	0	18.456	0	18.016	0	17.736	0	18.234	0	18.177	0	17.93	0	18.588	0	18.1	0	16.709	0	18.263	0	19.987	0	17.373	0	19.034	0	20.9	0	17.708	0	17.504	0	15.989	0	17.572	0	18.549	0
hsa-miR-296	Target			21.255	0	22.081	0			21.692	0	21.921	0	19.774	0	21.218	0	21.827	0			19.984	0	23.2	0	20.586	0	19.521	0	20.561	0	21.918	0	20.288	0	20.365	0	23.426	0			19.614	0	19.963	0	20.547	0	22.281	0
hsa-miR-296-3p	Target																															30	0					30	0
hsa-miR-298	Target															27.471	0													30	0
hsa-miR-299-3p	Target																											30	0
hsa-miR-299-5p	Target			25.288	0	25.568	0			26.709	0	25.194	0	23.568	0	24.195	0	24.674	0	25.232	0	23.809	0	24.403	0	23.928	0	22.619	0	25.118	0	25.913	0	23.15	0	23.696	0	28.381	0	23.847	0	24.704	0	23.158	0			24.871	0
hsa-miR-29a	Target			14.464	0	14.463	0	20.7	0	24.368	0	17.586	0	13.444	0	16.052	0	16.311	0	19.45	0	15.531	0	14.104	0	17.487	0	12.188	0	11.856	0	15.427	0	13.222	0	13.425	0	16.913	0	13.001	0	12.265	0	11.175	0	13.093	0	14.261	0
hsa-miR-29a#	Target			25.352	0	27.518	0	30	0	30	0	27.623	0	27.189	0			30	0					24.41	0	27.793	0	24.094	0	21.543	0					26.8	0			25.241	0	24.063	0	23.829	0	23.557	0	24.753	0
hsa-miR-29b	Target			20.986	0	21.725	0	23.216	0	23.431	0	21.23	0	22.012	0	20.995	0	20.165	0			22.514	0	21.276	0	24.791	0	18.891	0	18.235	0	22.861	0	21.185	0	21.776	0	25.775	0	19.756	0	19.764	0	19.64	0	19.334	0	19.475	0
hsa-miR-29b-1#	Target					27.062	0			26.555	0	29.516	0	26.486	0	27.651	0					28.472	0	27.029	0					25.878	0			27.529	0			28.252	0			25.13	0	25.307	0			29.321	0
hsa-miR-29b-2#	Target			26.829	0					27.588	0	27.551	0			25.535	0	29.367	0					28.585	0	25.992	0			28.358	0													30	0			26.876	0
hsa-miR-29c	Target			17.105	0	16.931	0	19.487	0	18.595	0	18.123	0	16.088	0	16.151	0	14.718	0	23.668	0	18.129	0	16.901	0	18.972	0	15.132	0	14.656	0	18.653	0	16.259	0	16.246	0	19.47	0	15.631	0	15.068	0	13.858	0	15.053	0	16.278	0
hsa-miR-301	Target			23.983	0	23.746	0	24.244	0	23.503	0	23.63	0	26.693	0	24.22	0	22.616	0	26.995	0	24.375	0	22.329	0	26.078	0	19.787	0	19.693	0	27.008	0	23.732	0	24.783	0	28.422	0	23.831	0	23.249	0	22.126	0	20.307	0	20.739	0
hsa-miR-301b	Target			28.189	0	27.595	0	27.676	0	25.595	0							26.725	0			30	0	26.211	0	27.026	0	24.181	0	22.665	0					29.887	0			28.199	0	25.558	0	25.544	0	24.201	0	24.049	0
hsa-miR-302a	Target					27.669	0							28.344	0							27.937	0			27.036	0	26.392	0	25.82	0					28.084	0			27.646	0	26.796	0	28.318	0
hsa-miR-302a#	Target			30	0																							30	0
hsa-miR-302b	Target					28.723	0									30	0	30	0	30	0	28.123	0	28.692	0	30	0	25.387	0	24.605	0			27.235	0	24.687	0			25.544	0	27.957	0	27.524	0
hsa-miR-302c	Target																											26.832	0	27.175	0															28.346	0
hsa-miR-302d	Target			28.2	0																					29.306	0	26.307	0	25.869	0			27.572	0	26.993	0	29.054	0	26.745	0	26.165	0	26.986	0			27.992	0
hsa-miR-30a-3p	Target			17.867	0	18.327	0	23.913	0	20.49	0	18.496	0	19.25	0	19.604	0	20.232	0	21.122	0	20.612	0	18.834	0	17.214	0	16.545	0	16.128	0	20.783	0	16.907	0	17.04	0	19.763	0	17.837	0	16.597	0	15.529	0	18.37	0	18.681	0
hsa-miR-30a-5p	Target			19.461	0	20.22	0	26.409	0	23.049	0	20.248	0	21.497	0	23.763	0	23.709	0	26.319	0	24.787	0	19.831	0	19.549	0	18.343	0	16.914	0	22.462	0	19.611	0	19.48	0	21.701	0	20.211	0	18.703	0	16.861	0	19.224	0	19.957	0
hsa-miR-30b	Target	30	0	16.281	0	16.396	0	21.632	0	23.017	0	18.636	0	15.618	0	17.545	0	19.25	0	20.497	0	17.703	0	16.861	0	18.225	0	14.49	0	15.123	0	17.893	0	15.461	0	15.306	0	18.336	0	15.353	0	14.9	0	13.5	0	16.682	0	16.606	0
hsa-miR-30c	Target	30	0	15.969	0	15.69	0	27.66	0			25.121	0	15.693	0	24.151	0	30	0	24.165	0	20.453	0	17.135	0	25.082	0	14.429	0	15.483	0	18.439	0	15.122	0	14.994	0	18.125	0	15.14	0	14.546	0	13.073	0	16.073	0	15.994	0
hsa-miR-30d	Target			22.002	0	22.098	0	24.316	0	23.203	0	21.741	0	22.134	0	22.035	0	21.3	0	29.637	0	26.298	0	22.022	0	22.837	0	21.081	0	20.021	0	25.156	0	22.476	0	21.596	0	23.655	0	22.402	0	20.692	0	19.266	0	20.653	0	22.173	0
hsa-miR-30d#	Target			26.487	0							29.219	0									30	0	26.968	0			26.474	0	25.103	0			27.051	0	27.336	0					25.998	0	24.825	0	26.134	0	26.135	0
hsa-miR-30e-3p	Target			18.85	0	20.887	0			30	0	25.686	0	25.559	0					30	0			20.394	0	22.933	0	19.404	0	20.706	0	23.985	0	18.557	0	18.956	0	21.429	0	18.719	0	17.195	0	16.23	0	20.48	0	20.843	0
hsa-miR-31	Target	23.038	0	16.321	0	15.711	0	15.95	0	15.604	0	16.357	0	12.9	0	14.005	0	13.73	0	16.92	0	15.213	0	12.818	0	16.177	0	12.041	0	13.392	0	14.597	0	12.845	0	14.272	0	16.456	0	12.627	0	13.506	0	12.906	0	11.73	0	13.334	0
hsa-miR-31#	Target			21.282	0	22	0	23.912	0	22.224	0	21.521	0	19.943	0	21.994	0	22.058	0	23.32	0	23.2	0	17.31	0	20.937	0	17.511	0	17.313	0	21.072	0	18.776	0	19.624	0	22.895	0	18.443	0	18.352	0	18.305	0	18.011	0	18.254	0
hsa-miR-32	Target			27.306	0	27.421	0					27.758	0					26.449	0			28.219	0	26.461	0			24.168	0	23.984	0			30	0					27.007	0	30	0	29.58	0	25.005	0	25.887	0
hsa-miR-320	Target	23.973	0	16.501	0	16.092	0	16.776	0	15.685	0	16.174	0	15.05	0	14.872	0	15.632	0	15.162	0	15.556	0	15.698	0	15.272	0	14.188	0	15.564	0	16.182	0	14.018	0	15.485	0	16.735	0	15.316	0	15.228	0	13.868	0	17.067	0	16.129	0
HSA-MIR-320B	Target			20.982	0	21.078	0	23.028	0	21.288	0	20.655	0	21.19	0	20.715	0	21.781	0			22.125	0	25.285	0	22.249	0	23.58	0	20.456	0	26.757	0	23.552	0	20.636	0	26.378	0	21.282	0	20.241	0	19.469	0	23.474	0	23.549	0
hsa-miR-323-3p	Target			21.837	0	22.366	0	23.432	0	22.905	0	23.29	0	20.171	0	21.203	0	21.859	0	23.698	0	22.089	0	21.99	0	22.908	0	19.737	0	20.692	0	23.696	0	19.726	0	20.435	0	23.441	0	21.362	0	20.862	0	20.185	0	21.051	0	21.522	0
hsa-miR-324-3p	Target			20.266	0	20.297	0	21.599	0	21.278	0	21.311	0	19.713	0	20.191	0	21.071	0	22.461	0	20.543	0	21.551	0	20.104	0	19.427	0	20.061	0	22.274	0	19.494	0	20.222	0	22.748	0	20.185	0	19.639	0	18.108	0	19.74	0	20.443	0
hsa-miR-324-5p	Target			21.393	0	21.52	0	24.874	0	24.611	0	23.356	0	21.375	0	22.188	0	22.834	0	28.32	0	22.582	0	23.138	0	22.426	0	20.532	0	20.102	0	23.351	0	21.101	0	20.615	0	24.194	0	20.291	0	19.957	0	19.163	0	21.458	0	21.69	0
hsa-miR-326	Target													26.165	0
hsa-miR-328	Target			18.413	0	18.499	0	17.803	0	17.479	0	18.436	0	17.046	0	18.073	0	18.406	0	18.007	0	16.997	0	19.277	0	17.149	0	16.966	0	17.875	0	19.812	0	17.33	0	17.444	0	19.814	0	17.249	0	17.411	0	16.987	0	17.499	0	18.716	0
hsa-miR-329	Target			30	0							28.287	0	26.112	0			27.227	0			26.836	0			27.865	0	26.536	0	26.299	0	30	0			27.511	0			26.487	0	25.764	0	25.893	0	27.21	0
hsa-miR-330	Target													23.486	0					23.748	0							22.993	0									30	0	23.746	0	23.078	0	22.186	0
hsa-miR-331	Target	27.986	0	18.026	0	18.086	0	19.23	0	17.858	0	18.828	0	16.624	0	17.347	0	18.035	0	18.646	0	17.851	0	17.332	0	17.857	0	15.495	0	16.322	0	19.366	0	16.233	0	16.511	0	19.602	0	16.135	0	16.139	0	15.208	0	15.821	0	17.564	0
hsa-miR-331-5p	Target									28.835	0	29.821	0					29.161	0					29.102	0			29.145	0	15.436	0	30	0	30	0	30	0			30	0			27.393	0			28.955	0
hsa-miR-335	Target			22.779	0	24.571	0	19.147	0	19.518	0	21.968	0	20.251	0	22.715	0	26.837	0	20.711	0	20.269	0	21.079	0	21.362	0	19.097	0	21.321	0	27.251	0	19.916	0	21.417	0	26.354	0	18.83	0	20.41	0	20.379	0	19.439	0	20.693	0
hsa-miR-335#	Target							22.629	0	24.453	0									25.666	0			25.048	0			23.974	0					23.348	0					23.066	0	22.362	0	23.498	0	23.334	0	24.346	0
hsa-miR-337-3p	Target			25.189	0	28.246	0	25.557	0	25.319	0	26.107	0	25.087	0	25.101	0	28.634	0	26.953	0	25.477	0	25.589	0	24.146	0	25.653	0	23.626	0	26.366	0	24.979	0	24.1	0	26.543	0	24.721	0	23.851	0	23.421	0
hsa-miR-337-5p	Target			22.039	0	22.982	0	24.538	0	22.968	0	23.436	0	23.622	0	22.5	0	20.977	0	25.745	0	22.599	0	23.119	0	22.508	0	20.841	0	19.72	0	27.051	0	22.656	0	22.299	0	26.43	0	23.275	0	21.619	0	20.707	0	21.017	0	21.832	0
hsa-miR-339-3p	Target			22.808	0	23.061	0	21.673	0	20.639	0	23.226	0	22.16	0	21.664	0	21.79	0	20.815	0	21.846	0	22.035	0	21.421	0	19.431	0	20.991	0	23.023	0	20.437	0	21.727	0	23.298	0	21.602	0	21.365	0	19.584	0	20.502	0	23.317	0
hsa-miR-339-5p	Target			21.096	0	20.99	0	20.447	0	19.46	0	20.996	0	20.531	0	20.443	0	20.017	0	20.996	0	19.195	0	21.44	0	19.165	0	19.714	0	19.444	0	22.946	0	20.223	0	20.159	0	23.48	0	19.485	0	19.355	0	19.171	0	19.7	0	21.32	0
hsa-miR-33a#	Target					27.599	0			27.496	0	30	0	30	0	29.812	0	25.783	0			30	0	28.495	0	30	0	26.32	0	30	0	28.844	0	30	0	27.392	0	29.601	0	29.704	0	28.132	0	29.245	0			26.689	0
hsa-miR-340	Target			23.312	0	24.035	0	26.031	0	23.829	0	25.029	0	24.181	0	23.975	0	23.645	0	26.881	0	24.389	0	25.215	0	24.298	0	21.286	0	22.182	0	28.954	0	23.687	0	24.617	0	29.471	0	23.565	0	23.757	0	20.885	0	22.593	0	22.926	0
hsa-miR-340#	Target			23.901	0	24.867	0	26.007	0	26.048	0	25.308	0	24.489	0	24.402	0	25.661	0			24.389	0	25.125	0	24.564	0	24.232	0	22.861	0	28.497	0	24.277	0	24.391	0	26.629	0	23.87	0	23.054	0	22.08	0	24.346	0	25.333	0
hsa-miR-342-3p	Target	24.65	0	18.669	0	18.588	0	18.476	0	16.934	0	18.108	0	16.717	0	16.848	0	18.493	0	16.78	0	17.752	0	17.466	0	17.911	0	16.386	0	18.494	0	19.433	0	16.187	0	18.039	0	20.161	0	17.992	0	17.707	0	15.554	0	16.888	0	18.223	0
hsa-miR-345	Target			20.333	0	19.612	0	21.463	0	20.387	0	21.238	0	20.691	0	19.876	0	20.1	0	21.802	0	20.427	0	21.327	0	20.209	0	19.223	0	19.411	0	24.969	0	19.172	0	20.139	0	24.295	0	19.588	0	17.847	0	16.381	0	19.729	0	21.503	0
hsa-miR-34a	Target			18.195	0	18.023	0	18.023	0	17.357	0	17.622	0	18.334	0	17.483	0	16.366	0	20.426	0	16.616	0	18.957	0	17.205	0	17.157	0	16.125	0	19.153	0	17.864	0	17.387	0	20.331	0	17.543	0	16.415	0	15.453	0	17.233	0	18.703	0
hsa-miR-34a#	Target			21.888	0	22.013	0	22.429	0	22.572	0	22.141	0	22.489	0	22.111	0	25.72	0	23.996	0	22.042	0	20.548	0	22.895	0	19.122	0	19.534	0	24.056	0	20.908	0	21.391	0	24.078	0	22.516	0	20.868	0	19.617	0	19.69	0	20.363	0
hsa-miR-34b	Target			23.7495	3.7498	24.054	4.0489	25.3055	4.4512	21.568	0	23.648	3.9089	24.6655	5.1555	22.6855	3.0243	22.461	0	22.04	0	23.5685	3.1275	23.0925	2.5915	20.359	0	23.13	3.7646	22.2955	2.2479	22.997	0	24.2335	5.5557	20.865	0	25.447	4.5665	23.6365	4.3324	20.012	0	21.6565	4.2999	23.476	2.8256	23.799	3.8155
hsa-miR-34c	Target			23.068	0	23.239	0	22.633	0	21.685	0	22.222	0	23.292	0	22.064	0	21.043	0	24.984	0	21.863	0	22.466	0	21.983	0	21.567	0	20.895	0	24.988	0	23.24	0	23.195	0	25.01	0	23.61	0	21.247	0	20.594	0	22.851	0	22.202	0
hsa-miR-361	Target			21.625	0	21.81	0	24.272	0	23.228	0	21.813	0	21.532	0	21.647	0	24.029	0	24.199	0	22.443	0	22.998	0	21.525	0	20.837	0	21.219	0	24.764	0	21.511	0	21.118	0	24.833	0	21.035	0	20.215	0	19.222	0	21.886	0	21.709	0
hsa-miR-361-3p	Target			25.451	0	26.018	0			25.174	0	24.921	0					24.2	0	27.87	0							24.946	0	23.295	0	27.245	0					26.965	0					22.969	0	25.586	0
hsa-miR-362	Target			22.478	0	22.481	0	23.308	0	23.02	0	22.389	0	21.732	0	21.432	0	22.272	0	23.345	0	22.209	0	23.233	0	21.669	0	20.483	0	21.306	0	23.65	0	21.166	0	21.857	0	23.681	0	20.499	0	20.913	0	19.721	0	21.914	0	22.271	0
hsa-miR-362-3p	Target			26.17	0	26.132	0	27.138	0	24.573	0	25.475	0	24.651	0	24.667	0	22.681	0			25.878	0	27.828	0	25.316	0	24.412	0	23.427	0	28.285	0	27.761	0	25.672	0			25.908	0	23.592	0	23.39	0	24.654	0	24.73	0
hsa-miR-363	Target																													26.255	0													26.56	0
hsa-miR-363#	Target							30	0
hsa-miR-365	Target			17.418	0	17.537	0	18.335	0	17.678	0	17.336	0	16.473	0	16.602	0	16.867	0	18.322	0	16.899	0	18.521	0	16.503	0	16.245	0	16.281	0	18.939	0	17.059	0	16.527	0	19.271	0	16.846	0	15.88	0	15.351	0	16.818	0	17.48	0
hsa-miR-367	Target			23.747	0									23.93	0											30	0	25.368	0	26.484	0
hsa-miR-369-3p	Target			26.921	0			28.037	0	29.551	0											26.537	0			26.062	0	27.454	0	25.32	0					27.007	0	29.505	0	27.128	0	25.852	0	25.667	0	27.785	0
hsa-miR-369-5p	Target			27.969	0	28.237	0	28.363	0	26.448	0	30	0	26.53	0	26.66	0	25.577	0	29.202	0	28.11	0	28.133	0	26.854	0	26.026	0	26.387	0			27.055	0	27.314	0	30	0	29.069	0	26.79	0	26.309	0	27.713	0	26.772	0
hsa-miR-370	Target			18.279	0	19.448	0	19.794	0	18.645	0	20.346	0	18	0	18.57	0	17.943	0	19.076	0	18.04	0	19.024	0	18.207	0	17.55	0	17.157	0	22.424	0	17.087	0	17.992	0	21.825	0	17.917	0	17.559	0	17.546	0	17.821	0	19.009	0
hsa-miR-372	Target					29.338	0	30	0							28.536	0									30	0			28.755	0									28.511	0	27.559	0
hsa-miR-373	Target																																											27.851	0
hsa-miR-374	Target	30	0	19.72	0	19.864	0	21.322	0	19.858	0	20.477	0	18.993	0	19.609	0	19.759	0	22.724	0	19.378	0	18.989	0	19.824	0	16.781	0	16.898	0	22.253	0	18.427	0	18.961	0	22.766	0	17.571	0	17.383	0	16.128	0	16.724	0	18.031	0
hsa-miR-374a#	Target																							28.949	0			28.14	0	25.324	0									29.675	0			27.058	0
hsa-miR-374b#	Target
hsa-miR-375	Target	28.432	0							28.161	0	26.188	0	26.273	0	26.997	0					27.011	0					25.641	0	26.658	0	26.475	0	25.466	0	25.601	0	27.815	0	26.094	0					27.088	0
hsa-miR-376a	Target			19.657	0	20.386	0	24.112	0	21.984	0	22.467	0	19.289	0	19.631	0	19.595	0	27.377	0	20.894	0	19.599	0	21.938	0	17.681	0	17.651	0	23.335	0	18.773	0	19.441	0	24.66	0	18.495	0	18.536	0	17.462	0	18.498	0	19.698	0
hsa-miR-376a#	Target											28.967	0													28.391	0			27.232	0			30	0							30	0	29.986	0
hsa-miR-376b	Target											28.587	0											28.073	0			25.609	0	25.207	0																	27.141	0
hsa-miR-376c	Target			19.454	0	20.067	0	21.696	0	20.097	0	21.423	0	20.047	0	20.84	0	19.511	0	21.295	0	19.503	0	18.394	0	18.995	0	16.255	0	16.569	0	23.585	0	18.902	0	18.895	0	23.816	0	19.893	0	18.138	0	16.748	0	18.268	0	17.501	0
hsa-miR-377	Target																							30	0															30	0
hsa-miR-377#	Target			28.978	0	30	0			30	0	30	0	30	0			28.108	0			28.413	0	30	0			29.329	0	27.616	0					28.346	0	30	0	30	0	28.65	0	26.951	0
hsa-miR-378	Target	30	0	27.29	0	28.979	0					28.863	0	30	0	30	0					25.922	0	28.506	0	26.7615	2.1503	27.521	0	26.828	0	28.085	0	26.372	0	26.836	0	30	0			26.196	0	25.467	0
hsa-miR-380-5p	Target			27.011	0	27.916	0			27.753	0			30	0	26.429	0	27.305	0					27.641	0	27.621	0	27.882	0	25.238	0			25.882	0	29.592	0	29.279	0			25.774	0	26.126	0			25.548	0
hsa-miR-381	Target			26.155	0									26.795	0							27.86	0	28.599	0			26.263	0	24.572	0					27.383	0			27.576	0	25.759	0	25.281	0	25.785	0	26.139	0
hsa-miR-382	Target			18.26	0	19.127	0	21.563	0			20.654	0	17.024	0	18.825	0	19.659	0									16.944	0	18.714	0			16.866	0	18.168	0					18.381	0	17.154	0	17.557	0	18.251	0
hsa-miR-383	Target			28.125	0					25.063	0	26.485	0											27.363	0															27.788	0	24.148	0
hsa-miR-409-3p	Target	23.483	0	15.545	0	17.055	0	21.873	0	18.914	0	16.962	0	16.781	0	19.313	0	22.412	0	18.333	0	20.102	0	16.683	0	16.371	0	15.493	0	14.942	0	18.717	0	14.161	0	15.037	0	17.706	0	16.132	0	15.078	0	14.672	0	19.273	0	17.327	0
hsa-miR-409-5p	Target			23.433	0	25.938	0			30	0	27.307	0	25.107	0	27.957	0	27.727	0			25.681	0	28.763	0	27.164	0	23.848	0	22.95	0			25.474	0	23.818	0			24.946	0	23.196	0	22.882	0			25.838	0
hsa-miR-410	Target	26.581	0	21.174	0	22.235	0	22.368	0	20.62	0	22.961	0	20.553	0	21.118	0	21.586	0	22.263	0	20.738	0	21.014	0	20.904	0	18.212	0	19.436	0	25.58	0	20.664	0	20.716	0	26.378	0	21.898	0	20.544	0	19.772	0	19.697	0	20.783	0
hsa-miR-411	Target	26.514	0	20.412	0	21.365	0	28.413	0	30	0	25.302	0	20.919	0	24.339	0	25.893	0	24.353	0	22.448	0	19.287	0	24.266	0	16.985	0	17.356	0	24.949	0	19.036	0	19.774	0	23.86	0	19.652	0	18.88	0	18.026	0	18.856	0	18.407	0
hsa-miR-411#	Target			25.267	0			26.953	0	25.761	0	29.59	0	26.54	0	25.65	0	28.83	0			24.595	0	25.302	0	24.844	0	25.662	0	24.393	0	29.083	0	24.689	0	23.792	0			25.383	0	24.603	0	24.023	0			25.849	0
hsa-miR-422a	Target																					29.044	0			28.138	0	23.507	0					29.569	0	30	0							26.754	0
hsa-miR-423-5p	Target			22.149	0	21.986	0	23.596	0	22.018	0	21.624	0	21.858	0	21.995	0	20.944	0	22.652	0	21.417	0	23.559	0	21.5	0	21.523	0	21.331	0	23.136	0	21.775	0	20.95	0	23.86	0	21.806	0	20.754	0	20.555	0	21.675	0	22.747	0
hsa-miR-424	Target					28.114	0							25.943	0	30	0					30	0	28.275	0			24.736	0	24.234	0	29.048	0	25.966	0	26.549	0	28.827	0	25.142	0	25.325	0	25	0			27.378	0
hsa-miR-424#	Target							27.262	0					24.114	0	26.003	0	26.266	0	26.407	0	26.042	0	24.88	0	23.907	0	23.082	0	22.448	0			22.671	0	23.662	0	27.391	0	22.835	0	22.96	0	23.075	0	24.842	0	24.489	0
hsa-miR-425#	Target	29.823	0	26.373	0	26.776	0	26.323	0	25.962	0	25.832	0	26.062	0	25.35	0	25.709	0	25.931	0	29.541	0	25.616	0	27.12	0	23.83	0	25.553	0	29.253	0	24.626	0	26.384	0	28.926	0	26.891	0	25.656	0	25.142	0	27.041	0	25.195	0
hsa-miR-425-5p	Target			20.281	0	20.394	0			21.32	0	21.272	0															18.804	0																	19.021	0	19.938	0
hsa-miR-429	Target																											30	0	29.035	0					30	0							29.558	0
hsa-miR-431	Target			19.41	0	20.326	0			20.872	0			19.759	0	19.277	0	18.8	0	22.25	0			20.081	0			18.672	0	18.211	0			17.899	0									19.508	0	18.818	0	19.934	0
hsa-miR-431#	Target											16.987	0
hsa-miR-432	Target			19.411	0	20.934	0	22.965	0	22.137	0	21.427	0	20.248	0	21.248	0	22.867	0	21.021	0	21.329	0	19.397	0	20.485	0	18.674	0	18.855	0	23.096	0	17.64	0	18.891	0	22.173	0	20.693	0	19.306	0	19.258	0	19.925	0	20.043	0
hsa-miR-433	Target			21.915	0	23.182	0	24.197	0	24.229	0	24.078	0	21.888	0	22.236	0	23.163	0	23.982	0	23.262	0	22.357	0	23.66	0	21.391	0	22.149	0	28.69	0	22.146	0	22.649	0	25.162	0			22.434	0	22.118	0	21.962	0	22.136	0
hsa-miR-449	Target			28.522	0									29.948	0									25.73	0			30	0	28.753	0	30	0							30	0	30	0	26.529	0	23.874	0	26.563	0
hsa-miR-449b	Target					27.342	0			28.324	0	27.526	0			29.705	0	27.194	0					28.537	0			28.039	0	27.291	0	28.349	0							30	0			26.476	0	24.605	0
hsa-miR-450a	Target			25.557	0					27.709	0	28.875	0	26.343	0	27.642	0			29.467	0							25.217	0					27.225	0					26.011	0	28.95	0	24.524	0	28.657	0	27.434	0
hsa-miR-450b-5p	Target													30	0									30	0			27.935	0					27.25	0							27.12	0	26.495	0			29.222	0
hsa-miR-452	Target	27.941	0	22.963	0	23.884	0	26.512	0	24.183	0	25.014	0	22.636	0	23.875	0	24.194	0	25.76	0	24.445	0	21.948	0	26.005	0	20.71	0	22.545	0	27.2	0	22.36	0	23.178	0	25.067	0	22.488	0	21.846	0	19.82	0	20.94	0	22.048	0
hsa-miR-452#	Target																																													30	0
hsa-miR-453	Target																			28.949	0
hsa-miR-454	Target	30	0	20.969	0	20.9	0	22.887	0	20.655	0	21.138	0	20.758	0	19.18	0	18.605	0	23.558	0	21.59	0	19.606	0	22.271	0	18.241	0	18.579	0	24.544	0	19.473	0	21.297	0	23.626	0	20.673	0	19.211	0	17.349	0	18.233	0	19.216	0
hsa-miR-454#	Target			28.026	0	29.153	0	27.881	0	27.962	0	27.333	0	27.394	0	25.671	0	28.786	0	29.679	0	27.828	0	27.014	0	28.397	0	27.689	0	27.27	0			26.131	0	27.521	0	30	0	27.7	0	28.8	0	25.877	0	29.018	0	27.609	0
hsa-miR-455	Target			23.481	0	24.182	0	27.172	0	27.917	0	24.607	0	25.092	0	24.93	0	25.537	0	28.359	0	24.942	0	22.882	0	26.114	0	21.684	0	21.168	0	25.464	0	22.636	0	23.734	0			22.061	0	21.878	0	21.281	0	21.569	0	22.765	0
hsa-miR-455-3p	Target			22.049	0	22.146	0	22.408	0	20.6	0	20.995	0	22.258	0	21.107	0	20.843	0	23.39	0	21.956	0	23.071	0	20.988	0	22.109	0	21.884	0	23.441	0	21.65	0	21.733	0	24.136	0	21.129	0	20.454	0	19.025	0	22.476	0	22.677	0
hsa-miR-483-3p	Target			19.484	0	20.511	0	22.445	0	20.562	0	19.252	0	23.108	0	20.183	0			24.317	0	20.751	0	21.12	0	19.442	0	19.421	0	17.968	0	25.569	0	20.981	0	18.988	0	20.227	0	21.833	0	19.575	0	18.483	0
hsa-miR-483-5p	Target	28.499	0	19.533	0	19.264	0	22.187	0	19.952	0	19.692	0	22.039	0	20.451	0	19.46	0	19.127	0	18.07	0	20.654	0	17.947	0	18.472	0	18.161	0	20.608	0	18.966	0	17.539	0	18.777	0	19.243	0	18.138	0	17.41	0	23.397	0	24.776	0
hsa-miR-484	Target	21.699	0	16.297	0	16.149	0	25.134	0			23.831	0	15.799	0	22.557	0			21.225	0	20.7	0	15.953	0			14.679	0	15.768	0	17.498	0	14.605	0	15.44	0	16.888	0	15.309	0	14.962	0	13.145	0	16.729	0	16.006	0
hsa-miR-485-3p	Target			22.385	0	22.503	0	30	0	30	0	26.64	0	21.484	0	25.456	0	29.34	0	24.296	0	23.992	0	22.589	0	26.798	0	21.698	0	22.775	0	23.605	0	21.021	0	21.32	0	24.488	0	22.331	0	22.397	0	22.974	0	22.993	0	22.894	0
hsa-miR-485-5p	Target									25.746	0			21.564	0					24.386	0			22.158	0			21.785	0					21.814	0
hsa-miR-486	Target																			30	0			25.749	0
hsa-miR-486-3p	Target															27.368	0			30	0
hsa-miR-487a	Target			25.159	0							26.81	0	24.689	0			24.205	0	30	0							26.182	0	24.47	0													23.933	0
hsa-miR-487b	Target			21.535	0	21.647	0	22.513	0	21.521	0	22.273	0	20.501	0	20.981	0	21.243	0	21.505	0	21.208	0	21.695	0	21.777	0	19.973	0	20.612	0	24.536	0	20.034	0	21.153	0	24.084	0	22.138	0	21.134	0	19.95	0	20.385	0	21.15	0
hsa-miR-489	Target			23.895	0	24.681	0	27.589	0	21.396	0	21.626	0	28.392	0	24.38	0	26.377	0	25.732	0	23.171	0	27.792	0	21.36	0	26.385	0	27.051	0	26.694	0	26.533	0	26.087	0	28.155	0	24.827	0	24.132	0	25.774	0
hsa-miR-493	Target			23.14	0	23.77	0			23.159	0	24.062	0	22.009	0	22.933	0	23.811	0			22.773	0	23.116	0	23.687	0	20.429	0	22.424	0	25.807	0	20.018	0	22.809	0	25.721	0			22.607	0	21.613	0			22.686	0
hsa-miR-494	Target			19.774	0	20.558	0	22.438	0	21.036	0	21.271	0	19.281	0	20.151	0	20.707	0	21.474	0	19.909	0	20.495	0	19.78	0	19.219	0			23.233	0	19.086	0	19.25	0	22.409	0	20.313	0	18.944	0	18.122	0	20.219	0	19.41	0
hsa-miR-497	Target			26.442	0	25.063	0	29.902	0	26.901	0	25.752	0	27.309	0	25.206	0	23.395	0			28.303	0			26.172	0	30	0	24.413	0			26.874	0	27.149	0			30	0	29.294	0	25.886	0	26.953	0	27.282	0
hsa-miR-500	Target			24.525	0	25.634	0			25.329	0	24.667	0	24.274	0	24.817	0	23.751	0	25.665	0	28.263	0	24.884	0	25.109	0	22.574	0	23.375	0	30	0	23.998	0	30	0	26.63	0			24.164	0	25.841	4.8522			24.516	0
hsa-miR-501-3p	Target															30	0																					30	0
hsa-miR-502	Target			24.318	0	23.998	0	26.557	0	26.49	0	26.184	0	24.073	0	24.532	0	24.099	0			24.375	0	25.537	0	24.204	0	23.566	0	22.865	0			24.751	0	24.493	0			23.935	0	22.271	0	22.001	0	23.564	0	25.008	0
hsa-miR-502-3p	Target			24.855	0	25.407	0	28.084	0	25.364	0	25.882	0	23.525	0	23.795	0	24.547	0	26.781	0	25.269	0	25.681	0	24.766	0	23.272	0	23.992	0	29.172	0	24.452	0	24.906	0	26.529	0	23.847	0	23.723	0	22.942	0	23.503	0	24.335	0
hsa-miR-505	Target			23.486	0	24.489	0	25.534	0	26.089	0	24.961	0	24.232	0	24.982	0	24.687	0			25.639	0	26.881	0	25.341	0	23.973	0	22.819	0	27.658	0	24.131	0	25.06	0			22.706	0	23.78	0	22.113	0
hsa-miR-505#	Target			23.795	0	24.227	0	23.227	0	22.984	0	23.735	0	23.255	0	22.027	0	23.17	0	24.799	0	23.445	0	24.857	0	23.511	0	23.636	0	22.547	0	25.826	0	22.781	0	23.594	0	26.736	0	23.888	0	22.539	0	22.097	0	23.746	0	24.165	0
hsa-miR-508	Target			29.596	0	27.003	0	28.485	0							28.764	0			30	0	30	0			28.195	0	28.587	0	30	0
hsa-miR-509-5p	Target					27.373	0			28.217	0	29.315	0			26.707	0	24.785	0	26.992	0			30	0					27.17	0													26.001	0	24.471	0	26.325	0
hsa-miR-511	Target									28.008	0	27.713	0					27.89	0							30	0	26.912	0							28	0					27.689	0
hsa-miR-512-3p	Target																	27.197	0			25.421	0	27.269	0	27.396	0	26.177	0			28.717	0											24.734	0			26.806	0
hsa-miR-512-5p	Target																																															30	0
hsa-miR-516-3p	Target									28.73	0			29.781	0			27.014	0					30	0	30	0	30	0	28.261	0					29.63	0			30	0	29.869	0	30	0
hsa-miR-517c	Target																	29.48	0
hsa-miR-518b	Target																											28.155	0
hsa-miR-518d-5p	Target																													28.547	0
hsa-miR-518e	Target																											30	0
hsa-miR-519a	Target																							30	0
hsa-miR-519b-3p	Target									30	0																																	30	0
hsa-miR-519d	Target									30	0
hsa-miR-520b	Target																	26.717	0
hsa-miR-520c-3p	Target			28.429	0																	23.524	0											28.649	0
HSA-MIR-520D-3P	Target			28.949	0			27.831	0													30	0							27.113	0							29.203	0					28.176	0			30	0
hsa-miR-520e	Target																					30	0											30	0							30	0
hsa-miR-520f	Target											28.583	0
hsa-miR-524	Target																																	30	0
hsa-miR-526b	Target					28.365	0
hsa-miR-532	Target			19.315	0	19.032	0	19.919	0	18.191	0	18.705	0	18.484	0	18.191	0	17.234	0	20.974	0	18.915	0	20.191	0	18.34	0	17.555	0	18.13	0	21.466	0	19.024	0	19.339	0	22.377	0	18.777	0	18.222	0	16.766	0	18.763	0	19.35	0
hsa-miR-532-3p	Target			20.342	0	19.927	0	20.092	0	19.137	0	19.48	0	18.803	0	18.587	0	19.27	0	19.846	0	19.36	0	21.252	0	18.798	0	18.642	0	19.606	0	20.815	0	18.762	0	19.627	0	21.261	0	19.105	0	19.189	0	18.024	0	20.125	0	20.591	0
hsa-miR-539	Target	27.799	0	19.755	0	20.091	0	20.184	0	19.076	0	20.015	0	18.606	0	18.961	0	19.765	0	19.12	0	19.52	0	19.558	0	19.508	0	18.086	0	19.317	0	22.5	0	18.207	0	19.419	0	21.898	0	19.664	0	19.425	0	18.175	0	18.743	0	19.396	0
hsa-miR-541	Target			30	0									30	0					30	0			30	0									30	0
hsa-miR-542-3p	Target			27.904	0	27.066	0	28.238	0	27.07	0			27.5	0	27.59	0	26.357	0									25.587	0	24.562	0			29.448	0	26.776	0			26.255	0	26.823	0	26.015	0	27.177	0
hsa-miR-542-5p	Target																											24.511	0																			25.32	0
hsa-miR-543	Target			22.078	0	22.716	0	22.851	0	22.531	0	23.511	0	22.116	0	21.908	0	22.822	0	24.225	0	20.958	0	23.408	0	22.225	0	23.605	0	21.85	0	27.589	0	21.987	0	21.563	0	25.782	0	22.983	0	22.144	0	22.899	0	23.928	0	25.428	0
hsa-miR-544	Target																	29.474	0											28.51	0													29.978	0
hsa-miR-545	Target															30	0			30	0			26.809	0			25.973	0	26.606	0															25.393	0	27.363	0
hsa-miR-545#	Target																							30	0			29.709	0	30	0					29.998	0					30	0
hsa-miR-548a	Target							28.531	0	29.723	0																					28.351	0											27.441	0
hsa-miR-548b	Target					30	0									30	0	26.807	0					30	0															29.982	0
hsa-miR-548b-5p	Target					27.449	0																							27.403	0											30	0			27.51	0	26.983	0
hsa-miR-548c	Target			27.907	0											27.543	0
hsa-miR-548c-5p	Target			30	0			27.762	0					30	0			27.636	0			27.119	0							27.684	0			30	0							27.674	0	30	0	29.381	0
hsa-miR-548d	Target																											28.041	0													29.31	0
hsa-miR-548d-5p	Target																									29.43	0	28.397	0							27.915	0			30	0	30	0
HSA-MIR-548E	Target																													30	0													28.58	0
HSA-MIR-548J	Target																																							30	0
HSA-MIR-548K	Target			30	0							30	0
HSA-MIR-548L	Target																																							30	0
hsa-miR-550	Target									28.465	0			29.498	0.7099	30	0					28.011	0			28.852	0							29.386	0					28.037	0	28.206	0	29.05	0
hsa-miR-551b	Target			28.74	0			28.324	0					28.263	0									26.768	0			25.449	0	23.749	0			27.933	0	26.615	0			27.714	0	27.068	0	27.544	0			28.157	0
hsa-miR-551b#	Target																									29.37	0	25.944	0	28.021	0			27.398	0					26.275	0	27.098	0	27.54	0
hsa-miR-564	Target															24.803	0					28.486	0			26.976	0	24.718	0					24.348	0			28.505	0
hsa-miR-567	Target																																			30	0
hsa-miR-570	Target			29.079	0					30	0					30	0	30	0							30	0			27.616	0															29.461	0
hsa-miR-572	Target																	26.489	0	24.971	0	26.236	0	25.999	0	24.985	0	24.772	0	24.615	0	22.972	0			25.952	0	24.939	0			26.563	0	24.663	0	24.979	0	24.581	0
hsa-miR-574-3p	Target	23.916	0	16.008	0	15.231	0	14.551	0	13.733	0	14.517	0	14.013	0	14.083	0	16.673	0	12.608	0	14.423	0	15.204	0	13.931	0	14.261	0	16.509	0	15.594	0	13.565	0	15.185	0	15.611	0	15.266	0	15.275	0	13.432	0	15.355	0	16.178	0
hsa-miR-576-3p	Target					28.713	0	28.577	0			28.501	0	26.304	0	26.782	0	27.275	0	29.642	0	27.462	0	28.586	0	27.698	0	26.84	0	24.937	0			27.707	0	26.003	0			25.391	0	24.486	0	24.461	0	26.7	0	26.4	0
hsa-miR-576-5p	Target					30	0											30	0																									29.83	0
HSA-MIR-577	Target			29.336	0
hsa-miR-578	Target																	30	0
hsa-miR-579	Target													30	0	29.958	0	27.365	0					30	0	29.563	0	26.938	0	24.404	0			30	0					29.731	0	27.024	0	25.687	0	26.942	0	28.303	0
hsa-miR-589	Target			26.6525	2.5831	28.676	0	26.76	0	27.536	3.4846	25.819	0	27.6185	0.9892	25.948	1.9035	26.805	1.5995					27.502	2.943	29.994	0	25.1135	0.9086	25.7595	2.9394	28.88	0	25.8825	2.2154	28.973	0					28.285	0	25.034	2.1637	24.474	0	25.265	0
HSA-MIR-590-3P	Target			24.964	0	27.339	0	27.354	0	24.663	0	25.481	0	25.654	0	24.004	0	24.175	0	29.662	0	25.912	0	22.83	0	25.866	0	22.262	0	21.01	0	29.47	0	23.919	0	24.823	0	30	0	24.842	0	23.25	0	22.234	0	21.996	0	23.128	0
hsa-miR-590-5p	Target			23.925	0	23.173	0			22.918	0	24.87	0			22.568	0	22.994	0			23.086	0	21.076	0	23.258	0	18.841	0	19.324	0	25.233	0			23.331	0	25.625	0			21.213	0	19.701	0			20.467	0
hsa-miR-591	Target																	30	0			30	0			30	0			30	0											30	0	30	0
hsa-miR-592	Target											29.206	0			28.422	0																	28.658	0					29.808	0					27.753	0
hsa-miR-597	Target			25.917	0	27.608	0			28.34	0	26.649	0					27.91	0					28.015	0	26.836	0	26.01	0	25.998	0	29.25	0							24.986	0	25.824	0	25.439	0	25.594	0	25.649	0
hsa-miR-598	Target			24.98	0	27.042	0	26.891	0	29.78	0	26.178	0	24.106	0	24.64	0	24.577	0	27.912	0	26.677	0	23.907	0	25.986	0	22.829	0	22.574	0	29.992	0	25.538	0	25.748	0	28.856	0	25.134	0	25.505	0	23.576	0	25.667	0	24.396	0
hsa-miR-601	Target			27.35	0	29.59	0	29.353	0	27.385	0	27.079	0	26.31	0			25.926	0			25.519	0	26.682	0	25.041	0	27.458	0	22.824	0	28.213	0			25.513	0	28.966	0	25.787	0	24.301	0	24.512	0	25.353	0
hsa-miR-604	Target					27.956	0																							30	0			29.168	0
hsa-miR-605	Target
hsa-miR-613	Target																	27.939	0			28.698	0
hsa-miR-615-5p	Target					26.2	0			27.59	0			27.255	0	29.065	0			28.521	0					25.834	0	24.036	0	25.8	0									27.002	0	25.407	0	24.556	0	23.852	0	24.734	0
hsa-miR-616	Target							25.949	0	25.497	0	26.908	0	27.284	0	25.213	0	25.27	0	29.116	0	28.949	0	28.246	2.1807	25.886	0	26.1795	0.0912	27.328	0	26.918	0	25.756	0	26.412	0			27.333	0	26.989	0	25.536	0	28.04	0
hsa-miR-618	Target			27.657	0					28.141	0	28.198	0	27.785	0	29.503	0							30	0					26.419	0											30	0	25.236	0			29.761	0
hsa-miR-622	Target									28.298	0																			28.68	0									30	0
hsa-miR-624	Target																	27.817	0					27.334	0
hsa-miR-625	Target			25.532	0	25.288	0			24.82	0	25.373	0	23.137	0	23.79	0	24.281	0	26.073	0	24.931	0	25.161	0	24.218	0	23.115	0	23.981	0	26.394	0	24.724	0	24.845	0	27.59	0			23.575	0	22.567	0	23.08	0	24.625	0
hsa-miR-625#	Target			22.746	0	22.178	0	21.242	0	21.535	0	21.76	0	21.636	0	20.228	0	21.769	0	21.076	0	21.185	0	22.227	0	21.428	0	21.08	0	21.5	0	23.054	0	20.597	0	21.629	0	23.286	0	22.485	0	20.96	0	20.228	0	22.403	0	22.683	0
hsa-miR-627	Target					29.978	0																					28.282	0	27.204	0			30	0	29.771	0							28.571	0	29.399	0
hsa-miR-628-3p	Target			25.284	0	25.617	0	24.098	0	25.141	0	25.722	0	24.24	0	23.952	0	25.893	0	23.437	0	24.856	0	23.894	0	24.842	0	21.87	0	24.331	0	26.137	0	21.667	0	24.328	0	25.566	0	24.619	0	23.886	0	23.483	0	23.76	0	24.437	0
hsa-miR-628-5p	Target			24.403	0	25.627	0	25.533	0	25.472	0	25.219	0	22.641	0	24.002	0	25.926	0	22.634	0	23.806	0	23.161	0	24.154	0	21.927	0	23.437	0	26.195	0	22.103	0	25.046	0	26.815	0	23.221	0	23.042	0	20.925	0	22.237	0	23.076	0
hsa-miR-629	Target			26.518	0			25.128	2.0563	24.863	0	27.354	0	28.019	2.8016	24.733	0	27.469	0	24.879	0			26.1965	1.7133	25.069	0	25.029	0.8853	27.872	3.0094	25.578	0	26.326	4.261	27.658	3.3121	25.734	0	25.183	1.6956	27.525	3.5002	24.2705	0.9468	26.0975	0.384	27.114	2.2557
hsa-miR-630	Target																																			30	0
hsa-miR-631	Target													30	0
hsa-miR-634	Target																																					30	0
hsa-miR-635	Target																					28.191	0	27.279	0					27.282	0
hsa-miR-636	Target					25.886	0			26.666	0	26.594	0	25.891	0	25.123	0	24.914	0	25.588	0			25.621	0	25.178	0	24.135	0	24.214	0	27.085	0	25.099	0			26.509	0	26.471	0			24.9	0	25.038	0	26.005	0
hsa-miR-638	Target							24.805	0					24.931	0	25.745	0	25.088	0			25.387	0	27.689	0	24.939	0	25.255	0	24.541	0					24.516	0					25.361	0	23.728	0
hsa-miR-639	Target													28.174	0																													29.085	0			26.754	0
hsa-miR-641	Target																					27.846	0													27.954	0							29.829	0
hsa-miR-642	Target			23.356	0	24.541	0	24.571	0	23.624	0	25.216	0	24.324	0	25.561	0	26.939	0	24.112	0	22.089	0	27.265	0	22.433	0	23.444	0	23.976	0	27.112	0	22.228	0	22.374	0	25.55	0	23.069	0	23.448	0	23.679	0	24.582	0	27.163	0
hsa-miR-645	Target																	27.262	0					28.764	0					27.163	0									30	0
hsa-miR-650	Target																	23.864	0	27.058	0			23.492	0	24.19	0	24.168	0	22.756	0	26.606	0					25.778	0									23.825	0
hsa-miR-651	Target																											28.063	0
hsa-miR-652	Target			21.973	0	20.867	0	22.979	0	20.702	0	22.125	0	22.074	0	19.873	0	18.996	0	29.88	0	21.929	0	24.285	0	21.079	0	22.594	0	20.339	0	26.83	0	22.762	0	21.759	0	25.317	0	21.65	0	19.627	0	17.936	0	21.555	0	24.436	0
hsa-miR-653	Target																	30	0
hsa-miR-654	Target			20.785	0									20.477	0	20.979	0	20.299	0	22.832	0	19.717	0	22.145	0	20.139	0	20.922	0	20.115	0	24.406	0	20.156	0	20.213	0	23.31	0	21.285	0	20.289	0	20.134	0
hsa-miR-654-3p	Target			25.526	0	24.791	0	26.933	0	24.031	0	24.9	0	24.286	0	24.385	0	24.349	0	27.67	0	24.33	0	30	0	24.31	0	26.784	0	25.497	0			24.865	0	25.785	0	29.217	0	25.293	0	23.827	0	23.538	0	26.675	0	26.493	0
hsa-miR-655	Target			23.742	0	25.171	0	26.571	0									23.558	0					25.776	0			21.762	0	21.964	0			24.23	0			27.704	0					22.077	0
hsa-miR-656	Target			24.615	0					29.521	0			29.706	0							30	0	27.005	0	26.284	0	26.325	0	23.972	0			25.05	0	24.48	0					23.16	0	22.91	0	26.098	0
hsa-miR-659	Target			24.278	0	24.765	0	25.304	0	26	0	24.557	0	26.061	0	23.289	0	24.897	0	28.518	0			26.71	0			26.757	0			30	0	23.96	0	25.198	0			25.094	0							24.867	0
hsa-miR-660	Target			21.816	0	21.39	0	22.478	0	20.421	0	21.478	0	20.584	0	20.501	0	18.189	0	24.415	0	21.776	0	21.169	0	20.799	0	18.279	0	18.352	0	24.825	0	21.387	0	21.389	0	25.992	0	21.435	0	19.976	0	18.276	0	19.185	0	20.219	0
hsa-miR-662	Target																													27.222	0
HSA-MIR-663B	Target					21.696	0													23.7	0			20.339	0	20.368	0	22.683	0	18.542	0	23.826	0	21.587	0											22.22	0	20.995	0
HSA-MIR-664	Target			19.761	0	20.058	0	19.229	0	19.513	0	18.955	0	19.476	0	18.827	0	22.511	0	19.274	0	19.863	0	18.362	0	19.397	0	17.036	0	19.156	0	19.858	0	17.271	0	19.237	0	19.716	0	20.294	0	19.629	0	17.74	0	18.718	0	19.23	0
hsa-miR-668	Target																											21.7	0					21.9	0
hsa-miR-671-3p	Target			23.876	0	23.816	0	23.498	0	22.226	0	23.416	0	22.216	0	21.484	0	22.713	0	23.086	0	22.911	0	23.238	0	22.968	0	22.142	0	23.61	0	23.711	0	22.109	0	22.747	0	24.715	0	23.122	0	22.348	0	21.666	0	23.285	0	23.706	0
hsa-miR-7-2#	Target																			26.245	0			26.895	0	25.011	0	24.843	0			28.388	0	24.696	0			28.381	0	24.898	0			24.904	0
hsa-miR-708	Target			22.545	0	21.323	0	20.58	0	18.816	0	20.202	0	21.511	0	21.146	0	21.6	0	21.326	0	19.339	0	22.671	0	19.188	0	19.477	0	20.862	0	22.855	0	20.537	0	21.179	0	26.735	0	18.924	0	18.712	0	17.387	0	25.935	0	22.448	0
hsa-miR-708#	Target
HSA-MIR-720	Target	22.076	0	15.067	0	15.913	0	14.622	0	14.386	0	15.472	0	13.228	0	13.028	0	14.737	0	12.539	0	13.686	0	11.954	0	12.915	0	12.122	0	12.344	0	14.314	0	12.791	0	13.242	0	13.38	0	14.206	0	13.395	0	13.082	0	14.483	0	14.249	0
hsa-miR-744	Target			21.083	0	20.818	0	21.305	0	20.379	0	21.215	0	19.488	0	19.96	0	20.272	0	21.506	0	20.534	0	21.505	0	20.098	0	18.792	0	19.456	0	22.052	0	18.781	0	20.487	0	21.789	0	19.579	0	19.457	0	17.914	0	20.209	0	20.897	0
hsa-miR-744#	Target			27.118	0	30	0	27.373	0	29.163	0	27.887	0	26.76	0	25.18	0	27.056	0			29.259	0	27.814	0	25.611	0	25.734	0	25.4	0	29.123	0	24.716	0	26.425	0	29.769	0	25.386	0	24.718	0	23.74	0	28.169	0	28.151	0
hsa-miR-758	Target			25.536	0	26.252	0	26.851	0	24.921	0	25.685	0	26.833	0	26.596	0	24.993	0	30	0	26.16	0	25.202	0	30	0	24.211	0	23.419	0			25.091	0	26.113	0			27.144	0	25.254	0	24.901	0	26.334	0	24.171	0
HSA-MIR-765	Target					28.786	0																											25.537	0
hsa-miR-766	Target			23.109	0	22.695	0	21.283	0	21.202	0	22.059	0	20.835	0	20.415	0	21.192	0	23.571	0			21.987	0	22.378	0	21.277	0	20.671	0	25.481	0	21.901	0	21.743	0	24.63	0	23.342	0	22.334	0	20.942	0	21.51	0	21.155	0
hsa-miR-769-5p	Target			23.043	0	23.348	0	23.053	0	22.938	0	23.28	0	23.522	0	22.519	0	23.081	0	25.657	0	23.055	0	22.874	0	23.735	0	22.49	0	21.171	0	25.416	0	22.639	0	23.093	0	26.621	0	23.241	0	21.743	0	21.289	0	22.183	0	23.031	0
hsa-miR-770-5p	Target	26.705	0	26.027	0	27.269	0					27.094	0	25.502	0	25.563	0			24.375	0			25.072	0			23.253	0	24.069	0			22.146	0									25.88	0	23.778	0	24.736	0
hsa-miR-873	Target																													30	0
hsa-miR-874	Target											23.334	0
hsa-miR-885-5p	Target			23.183	0	24.824	0	23.581	0	24.239	0	24.196	0	24.115	0	23.945	0	24.817	0	22.877	0	24.835	0	25.561	0	25.139	0	25.577	0	25.162	0	23.374	0	21.058	0	23.792	0	25.459	0	24.187	0	24.296	0	24.635	0	23.038	0	28.107	0
hsa-miR-886-3p	Target	26.509	0	21.49	0	20.747	0	19.978	0	20.427	0	20.244	0	22.455	0	22.654	0	21.679	0	23.09	0	22.123	0	17.582	0	20.522	0	16.675	0	15.532	0	22.812	0	20.694	0	21.493	0	24.714	0	21.825	0	21.823	0	20.148	0	16.355	0	17.23	0
hsa-miR-886-5p	Target			19.471	0	19.533	0	17.951	0	17.521	0	18.425	0	18.809	0	19.276	0	20.365	0	18.386	0	18.632	0	17.524	0	19.054	0	16.306	0	17.201	0	21.036	0	17.212	0	18.882	0	21.172	0	19.43	0	19.143	0	17.807	0	15.638	0	17.789	0
hsa-miR-887	Target
hsa-miR-888	Target					26.373	0			25.894	0							26.086	0	28.991	0			27.505	0	24.906	0	25.803	0	26.539	0							28.726	0			26.201	0	26.064	0	25.501	0
hsa-miR-889	Target			22.54	0	23.126	0	23.357	0	22.325	0	23.379	0	22.312	0	22.27	0	21.715	0	23.894	0	21.977	0	22.847	0	21.827	0	21.309	0	21.025	0	26.942	0	22.074	0	21.614	0	25.38	0	23.109	0	21.518	0	20.882	0	22.165	0	22.636	0
hsa-miR-891a	Target			28.96	0	29.415	0			26.49	0															30	0					26.565	0					29.597	0
hsa-miR-892b	Target							27.865	0																																	28.181	0
hsa-miR-9#	Target							28.356	0			27.272	0			28.38	0	26.799	0			30	0					26.572	0	25.955	0			28.644	0	27.21	0			28.256	0	30	0	29.985	0
hsa-miR-922	Target
hsa-miR-92a	Target			18.411	0	18.144	0	17.845	0	17.325	0	17.72	0	17.001	0	17.143	0	17.636	0	18.252	0	17.417	0	18.951	0	17.426	0	17.19	0	17.766	0	17.567	0	17.422	0	17.75	0	18.687	0	16.845	0	16.904	0	16.314	0	17.967	0	18.536	0
hsa-miR-92a-1#	Target			30	0													29.481	0					30	0	30	0	27.446	0	30	0			30	0	26.808	0	30	0	30	0	28.734	0
hsa-miR-93#	Target			23.9	0	23.492	0	23.752	0	23.094	0	23.093	0	22.867	0	22.689	0	23.275	0	24.188	0	23.71	0	22.25	0	23.267	0	21.802	0	22.222	0	25.641	0	21.98	0	22.788	0	24.133	0	23.517	0	22.005	0	20.84	0	23.079	0	23.448	0
hsa-miR-938	Target																							30	0													30	0							28.764	0
hsa-miR-939	Target			21.924	0	21.794	0	21.742	0	22.053	0	22.197	0	22.213	0	20.911	0	21.87	0			21.7	0	22.283	0	21.049	0	21.524	0	20.603	0	24.148	0	21.829	0	21.294	0	23.767	0	21.878	0	21.162	0	20.937	0	22.084	0	21.738	0
hsa-miR-941	Target							24.493	0					24.741	0
hsa-miR-942	Target			24.393	0	24.12	0	24.471	0	24.496	0	23.886	0	24.292	0	24.451	0	25.493	0	25.347	0	24.131	0	23.385	0	23.69	0	24.274	0	22.463	0	25.159	0	22.33	0	22.937	0	24.882	0	22.745	0	22.387	0	22.44	0	23.09	0	22.678	0
hsa-miR-943	Target																											28.007	0					28.643	0			30	0
hsa-miR-944	Target									29.31	0							30	0					29.83	0					30	0			29.124	0									28.017	0
hsa-miR-95	Target			24.02	0	23.765	0	25.227	0	24.246	0	23.258	0	25.455	0	24.056	0	23.754	0	25.702	0	23.042	0			21.563	0	23.41	0	21.228	0	27.833	0	23.461	0	23.562	0	24.387	0	25.772	0	22.403	0	19.774	0	23.525	0	24.279	0
hsa-miR-98	Target			20.826	0					20.859	0							21.568	0			21.206	0					20.418	0	20.831	0													19.63	0			21.958	0
hsa-miR-99a	Target			13.303	0	13.174	0	13.521	0	12.665	0	13.15	0	12.141	0	12.762	0	12.871	0	14.282	0	12.557	0	13.962	0	12.722	0	12.354	0	12.128	0	14.311	0	12.303	0	12.458	0	15.202	0	12.042	0	11.723	0	10.903	0	16.463	0	13.434	0
hsa-miR-99a#	Target			29.37	0	28.536	0	25.138	0	30	0	25.661	0	26.047	0	27.423	0	24.568	0			26.858	0	25.056	0	26.389	0	25.93	0	24.737	0			26.426	0	26.743	0			27.893	0	26.594	0	24.418	0	23.374	0	24.453	0
hsa-miR-99b	Target			16.542	0	16.859	0	17.31	0	15.838	0	17.039	0	15.42	0	15.973	0	17.05	0	17.448	0	15.511	0	18.016	0	15.704	0	15.291	0	15.481	0	18.394	0	15.379	0	15.529	0	18.672	0	15.773	0	15.399	0	14.248	0	17.202	0	17.441	0
hsa-miR-99b#	Target	26.323	0	23.802	0	23.748	0	22.397	0	23.787	0	22.855	0	23.079	0	22.827	0	22.873	0	21.269	0	22.828	0	22.349	0	23.083	0	20.808	0	21.706	0	24.582	0	20.765	0	22.74	0	25.228	0	23.32	0	22.757	0	21.559	0	22.045	0	22.662	0
mmu-let-7d#	Target											26.58	0							25.931	0							26.016	0			29.678	0					28.685	0
mmu-miR-124a	Target															25.047	0							23.866	0			23.795	0	22.845	0	25.529	0	25.656	0			30	0									20.861	0
mmu-miR-129-3p	Target			25.119	0			23.561	0	22.941	0	23.907	0											25.953	0			24.553	0	23.742	0	26.511	0
mmu-miR-134	Target			19.214	0	19.965	0	20.05	0	18.43	0	19.87	0	18.472	0	18.371	0	18.696	0	18.517	0	18.753	0	19.377	0	18.859	0	18.497	0	18.264	0	22.475	0	17.254	0	18.04	0	23.024	0	19.165	0	17.901	0	17.169	0	18.938	0	19.788	0
mmu-miR-137	Target			21.98	0	22.576	0	21.102	0	20.553	0	21.018	0	20.62	0	20.84	0	20.185	0	22.5	0	19.698	0	21.634	0	19.898	0	19.083	0	19.596	0	24.962	0	20.76	0	20.623	0	25.53	0	20.044	0	19.807	0	19.226	0	20.851	0	20.786	0
mmu-miR-140	Target			18.803	0	19.377	0	19.711	0	19.148	0	19.417	0	17.959	0	18.532	0	18.263	0	21.171	0	19.233	0	17.302	0	19.72	0	14.604	0	15.673	0	21.255	0	17.951	0	18.874	0	22.428	0	18.048	0	17.516	0	16.236	0	14.551	0	16.1	0
mmu-miR-187	Target					25.344	0											25.17	0					25.19	0													30	0					28.909	0	22.443	0	29.125	0
mmu-miR-374-5p	Target			18.915	0	19.312	0	19.338	0	17.853	0	19.08	0	18.441	0	17.924	0	18.826	0	18.479	0	18.157	0	19.082	0	17.572	0	17.221	0	17.765	0	20.662	0	17.985	0	18.469	0	20.296	0	17.333	0	17.55	0	15.772	0	17.348	0	19.347	0
mmu-miR-379	Target			20.673	0	21.567	0			22.059	0	23.04	0	21.402	0	21.854	0	22.408	0			20.959	0	20.424	0	22.526	0	18.509	0	19.075	0	25.235	0	20.053	0	20.809	0	25.652	0			20.138	0	19.376	0	18.431	0	19.658	0
mmu-miR-451	Target			27.295	0	26.66	0			25.464	0	28.656	0			27.081	0	29.182	0			25.456	0			29.33	0	27.978	0					26.86	0					25.751	0	25.902	0			23.864	0
mmu-miR-491	Target			21.647	0	21.845	0	21.663	0	20.715	0	21.608	0	20.412	0	20.507	0	21.154	0	21.211	0	20.694	0	21.326	0	20.651	0	19.639	0	20.408	0	21.808	0	20.008	0	21.159	0	21.955	0	20.934	0	20.449	0	18.803	0	20.549	0	21.632	0
mmu-miR-495	Target			19.627	0	20.797	0	21.09	0	19.698	0	20.703	0	19.197	0	19.862	0	21.282	0	21.322	0	19.853	0	21.165	0	19.902	0	19.845	0	20.101	0	24.423	0	19.723	0	20.428	0	23.876	0	20.223	0	20.234	0	19.368	0	20.703	0	21.092	0
mmu-miR-496	Target																									28.194	0	29.777	0																	28.586	0
mmu-miR-499	Target													30	0
mmu-miR-615	Target													20.299	0													21.137	0	21.27	0									21.31	0	21.068	0	21.182	0
mmu-miR-93	Target			19.558	0	19.365	0	20.059	0	18.862	0	19.485	0	19.386	0	18.166	0	18.079	0	22.41	0	19.843	0	19.833	0	19.848	0	18.169	0	17.812	0	22.587	0	19.425	0	19.518	0	22.805	0	18.481	0	17.723	0	16.176	0	19.358	0	19.515	0
mmu-miR-96	Target																													27.385	0			29.338	0
rno-miR-29c#	Target			26.293	0	26.958	0	26.84	0	26.754	0	26.933	0	27.187	0	25.686	0	23.809	0	30	0	27.001	0	26.016	0	26.39	0	26.22	0	24.192	0			26.412	0	27.308	0			27.652	0	26.12	0	24.28	0	24.087	0	26.478	0
rno-miR-7#	Target			21.054	0	21.096	0	20.377	0	20.424	0	20.581	0	20.503	0	19.645	0	20.719	0	21.606	0	19.942	0	20.466	0	20.601	0	19.207	0	19.655	0	23.555	0	19.455	0	20.457	0	22.152	0	19.707	0	19.279	0	18.322	0	20.275	0	20.267	0
RNU44	Candidate Control	25.896	2.8383	15.7468	0.1605	15.4879	0.3547	16.0587	1.6466	15.3401	1.0199	15.3471	0.9463	14.2798	0.8006	14.315	0.547	14.8081	1.1741	16.8021	1.16	14.6299	1.0981	15.6503	0.2209	14.2133	0.7925	14.1247	0.7284	13.2775	0.2671	14.666	0.4955	13.9659	0.3478	13.9175	0.2716	16.7313	0.1515	14.2013	0.5055	13.4973	0.1244	12.5074	0.1741	15.3395	0.9905	15.2898	0.3416
RNU48	Selected Control	16.3468	0.1776	12.5623	0.1163	12.3616	0.2231	13.0304	1.205	12.5963	0.8626	12.4302	0.8242	11.0535	0.5418	11.1099	0.589	12.0722	0.8158	12.3697	0.9384	12.321	0.9951	12.3653	0.1276	11.9166	0.6062	10.5899	0.1671	11.2454	0.2765	12.351	0.3075	10.6944	0.1145	11.6042	0.0466	12.5924	0.2964	11.9254	0.3967	11.5119	0.0988	10.16	0.2063	11.0267	0.4843	11.5648	0.0823
U6 rRNA	Candidate Control	16.7284	0.3816	11.0513	0.6182	10.7343	0.4413	11.7534	1.4135	10.934	0.9965	11.6066	1.2639	9.8963	0.2178	10.3255	0.7822	10.8844	1.0831	11.0216	0.816	11.0035	1.0387	10.3423	0.1311	10.5924	0.8951			9.5775	0.115	10.7311	0.3518			10.225	0.089	10.7508	0.857	9.6047	0.1009	9.7451	0.0878					10.4206	0.222
[truncated: 10 more columns]

## Sheet: Delta CT
DataAssist Software v3.0
Study: Mesenchymal
Description: Mesenchymal Stem Cells
Maximum allowable CT value: 30.0
Include max CT values in calculations: Yes
Exclude outliers among replicates: Yes
Adjust p-values using Benjamini-Hochberg False Discovery Rate: No
Normalization method: Endogenous Control
Selected controls: RNU48
Reference sample: MSC1
Assay	Type	MSC1 (DCT)	MSC1 (STDEV)	MSC10 (DCT)	MSC10 (STDEV)	MSC11 (DCT)	MSC11 (STDEV)	MSC12 (DCT)	MSC12 (STDEV)	MSC13 (DCT)	MSC13 (STDEV)	MSC14 (DCT)	MSC14 (STDEV)	MSC15 (DCT)	MSC15 (STDEV)	MSC16 (DCT)	MSC16 (STDEV)	MSC17 (DCT)	MSC17 (STDEV)	MSC18 (DCT)	MSC18 (STDEV)	MSC19 (DCT)	MSC19 (STDEV)	MSC2 (DCT)	MSC2 (STDEV)	MSC20 (DCT)	MSC20 (STDEV)	MSC21 (DCT)	MSC21 (STDEV)	MSC22 (DCT)	MSC22 (STDEV)	MSC23 (DCT)	MSC23 (STDEV)	MSC24 (DCT)	MSC24 (STDEV)	MSC25 (DCT)	MSC25 (STDEV)	MSC26 (DCT)	MSC26 (STDEV)	MSC27 (DCT)	MSC27 (STDEV)	MSC28 (DCT)	MSC28 (STDEV)	MSC29 (DCT)	MSC29 (STDEV)	MSC3 (DCT)	MSC3 (STDEV)	MSC4 (DCT)	MSC4 (STDEV)
ath-miR159a	Candidate Control																							13.0392	1.2036							15.433	0.3075					14.9866	0.2964
dme-miR-7	Candidate Control			15.0877	0.1163													14.5108	0.8158	15.3883	0.9384	14.059	0.9951	15.9077	0.1276			16.4821	0.1671	13.8636	0.2765											14.2421	0.0988	15.895	0.2063			16.3832	0.0823
hsa-let-7a	Target			3.9607	0.1163	4.6174	0.2231	6.2766	1.205	6.6517	0.8626	4.7258	0.8242	4.6225	0.5418	4.9371	0.589	4.6408	0.8158	9.2203	0.9384	5.166	0.9951	5.4897	0.1276	6.5964	0.6062	5.5341	0.1671	5.1486	0.2765	5.483	0.3075	5.3706	0.1145	4.3988	0.0466	5.8306	0.2964	3.4906	0.3967	4.3271	0.0988	5.157	0.2063
hsa-let-7a#	Target													17.7525	0.5418
hsa-let-7b	Target													2.7595	0.5418	3.4651	0.589	2.7938	0.8158							2.6454	0.6062			2.7106	0.2765											2.1221	0.0988	3.3	0.2063
hsa-let-7c	Target			7.6798	0.1163	8.5004	0.2231	8.3136	1.205	8.7287	0.8626	7.6898	0.8242	7.3555	0.5418	8.1771	0.589	8.1218	0.8158	9.4293	0.9384	7.391	0.9951	7.8797	0.1276	7.7034	0.6062	8.8261	0.1671	8.7186	0.2765	8.804	0.3075	8.6656	0.1145	8.2338	0.0466	8.9816	0.2964	7.1566	0.3967	7.0141	0.0988	8.082	0.2063	7.3433	0.4843	7.9512	0.0823
hsa-let-7d	Target			6.0778	0.1163	6.5504	0.2231	7.5656	1.205	7.0187	0.8626	6.3358	0.8242	7.2655	0.5418	6.8361	0.589	6.5478	0.8158	8.3383	0.9384	6.308	0.9951	8.1917	0.1276	6.7644	0.6062	7.8081	0.1671	6.7436	0.2765	8.097	0.3075	7.7676	0.1145	6.7098	0.0466	8.7086	0.2964	6.4506	0.3967	6.2771	0.0988	6.795	0.2063	7.8803	0.4843	8.2242	0.0823
hsa-let-7e	Target			1.8948	0.1163	2.5294	0.2231	1.9926	1.205	1.8387	0.8626	0.9928	0.8242	2.5365	0.5418	2.5951	0.589	2.6798	0.8158	1.9293	0.9384	1.452	0.9951	2.0697	0.1276	2.1404	0.6062	2.6491	0.1671	2.9386	0.2765	2.438	0.3075	2.5576	0.1145	2.6568	0.0466	2.4406	0.2964	2.1956	0.3967	2.3851	0.0988	2.959	0.2063			2.9432	0.0823
hsa-let-7e#	Target											17.5698	0.8242					16.0388	0.8158							16.1904	0.6062	19.4101	0.1671	15.1106	0.2765			19.3056	0.1145	18.3958	0.0466			18.0746	0.3967	18.0581	0.0988	19.84	0.2063	18.9733	0.4843
hsa-let-7f	Target			8.5907	0.1163	8.6964	0.2231	8.7586	1.205	8.4667	0.8626	8.4458	0.8242	9.7075	0.5418	9.6631	0.589	9.4168	0.8158	10.8403	0.9384	7.743	0.9951	9.9817	0.1276	8.5164	0.6062	9.9061	0.1671	8.8266	0.2765	9.602	0.3075	9.8286	0.1145	8.7678	0.0466	9.7946	0.2964	8.3626	0.3967	8.4561	0.0988	9.176	0.2063			10.7882	0.0823
hsa-let-7f-1#	Target																					17.679	0.9951
hsa-let-7f-2#	Target			17.4378	0.1163	16.0214	0.2231			14.6967	0.8626					18.8901	0.589	16.5768	0.8158					17.6347	0.1276	16.3844	0.6062	19.4101	0.1671	17.6046	0.2765	17.649	0.3075							17.6746	0.3967	17.4301	0.0988	18.747	0.2063
hsa-let-7g	Target			5.5108	0.1163	5.6694	0.2231	6.0396	1.205	5.0717	0.8626	5.4488	0.8242	6.5925	0.5418	6.2001	0.589	4.9558	0.8158	6.8183	0.9384	5.422	0.9951	5.9347	0.1276	5.6104	0.6062	5.9951	0.1671	5.3566	0.2765	7.3	0.3075	6.8036	0.1145	6.5028	0.0466	7.7306	0.2964	6.2086	0.3967	5.9221	0.0988	5.753	0.2063	6.7573	0.4843	6.3502	0.0823
hsa-let-7g#	Target																							17.5957	0.1276									19.3056	0.1145
hsa-miR-100	Target			0.6578	0.1163	0.8474	0.2231	1.3146	1.205	1.4677	0.8626	1.2998	0.8242	1.1515	0.5418	1.9831	0.589	1.7578	0.8158	2.8743	0.9384	0.613	0.9951	1.3087	0.1276	1.1304	0.6062	1.7501	0.1671	0.7296	0.2765	1.89	0.3075	1.7196	0.1145	0.6028	0.0466	2.6486	0.2964	-0.1454	0.3967	-0.0379	0.0988	0.628	0.2063	1.3343	0.4843	1.7122	0.0823
hsa-miR-100#	Target			15.2157	0.1163	16.5984	0.2231					16.7958	0.8242	17.2735	0.5418	17.8021	0.589	13.5928	0.8158					11.7347	0.1276			14.9501	0.1671	12.2406	0.2765			16.1266	0.1145	15.4728	0.0466			15.9966	0.3967	14.7731	0.0988	16.161	0.2063	14.1253	0.4843	13.0622	0.0823
hsa-miR-101	Target			13.1457	0.1163	13.8544	0.2231	13.8756	1.205	14.2067	0.8626	15.2168	0.8242	15.3055	0.5418	15.4641	0.589	13.2028	0.8158			15.151	0.9951	12.2707	0.1276	15.8184	0.6062	12.0601	0.1671	10.5596	0.2765			16.0716	0.1145	16.8118	0.0466			13.2676	0.3967	13.2671	0.0988	13.421	0.2063	11.7513	0.4843	12.4112	0.0823
hsa-miR-101#	Target																									18.0834	0.6062	19.4101	0.1671
hsa-miR-103	Target			6.5368	0.1163	7.0814	0.2231	8.0866	1.205	7.6007	0.8626	7.6808	0.8242	7.9515	0.5418	7.6961	0.589	7.4758	0.8158	8.8073	0.9384	6.997	0.9951	7.7007	0.1276	7.3034	0.6062	7.3131	0.1671	6.5206	0.2765	8.858	0.3075	7.9976	0.1145	6.8108	0.0466	8.8856	0.2964	6.6126	0.3967	6.0911	0.0988	6.545	0.2063	7.3643	0.4843	7.5902	0.0823
hsa-miR-106a	Target	11.3083	0.1776	4.8067	0.1163	5.0224	0.2231	5.3226	1.205	4.6727	0.8626	5.0888	0.8242	6.1015	0.5418	5.3281	0.589	4.1048	0.8158	6.5163	0.9384	5.018	0.9951	3.5487	0.1276	6.0444	0.6062	3.9511	0.1671	3.1246	0.2765	4.475	0.3075	5.3746	0.1145	5.4738	0.0466	6.2356	0.2964	2.6386	0.3967	3.4091	0.0988	3.444	0.2063	4.8463	0.4843	4.4422	0.0823
hsa-miR-106b	Target			7.2977	0.1163	7.2964	0.2231	6.4666	1.205	5.9107	0.8626	7.2838	0.8242	8.5835	0.5418	7.5801	0.589	5.5158	0.8158	9.7723	0.9384	6.802	0.9951	7.4907	0.1276	7.4724	0.6062	7.1031	0.1671	5.8816	0.2765	10.15	0.3075	9.0236	0.1145	7.7118	0.0466	11.5496	0.2964	6.5756	0.3967	6.2721	0.0988	6.622	0.2063	6.7393	0.4843	7.2072	0.0823
hsa-miR-106b#	Target			10.1347	0.1163	10.7674	0.2231	10.9166	1.205	9.8277	0.8626	10.5308	0.8242	11.5485	0.5418	10.6491	0.589	10.6168	0.8158	12.7243	0.9384	10.371	0.9951	10.9497	0.1276	11.0324	0.6062	11.5921	0.1671	10.2836	0.2765	17.649	0.3075	11.9586	0.1145	11.4188	0.0466	13.0816	0.2964	10.6886	0.3967	9.9481	0.0988	10.866	0.2063			11.0302	0.0823
hsa-miR-107	Target			11.8347	0.1163	11.7234	0.2231	10.9146	1.205	10.3357	0.8626	11.1118	0.8242	11.9495	0.5418	11.2441	0.589	10.0048	0.8158	12.6953	0.9384	11.17	0.9951	14.4687	0.1276	11.6484	0.6062	12.2671	0.1671	11.7176	0.2765	13.936	0.3075	13.7656	0.1145	11.9278	0.0466			10.8746	0.3967	10.5571	0.0988	11.887	0.2063	12.3783	0.4843
hsa-miR-10a	Target			12.0767	0.1163	11.2504	0.2231	9.3476	1.205					9.8415	0.5418	10.3631	0.589	9.0348	0.8158	13.8213	0.9384	11.239	0.9951	12.2247	0.1276	10.6194	0.6062	14.6821	0.1671	13.5846	0.2765	14.106	0.3075	17.7816	0.1145					8.3856	0.3967	8.1791	0.0988	8.178	0.2063	10.3853	0.4843	11.6942	0.0823
hsa-miR-10a#	Target																	17.3588	0.8158																									19.488	0.2063
hsa-miR-10b	Target			6.9607	0.1163	6.3264	0.2231	5.3396	1.205	4.3567	0.8626	5.8228	0.8242	7.1205	0.5418	6.7091	0.589	5.1008	0.8158	11.8703	0.9384	7.069	0.9951	6.4477	0.1276	6.5024	0.6062	6.0831	0.1671	5.7046	0.2765	8.689	0.3075	8.4896	0.1145	8.0538	0.0466	14.3026	0.2964	4.8106	0.3967	4.5391	0.0988	4.891	0.2063	6.2153	0.4843	6.6112	0.0823
hsa-miR-10b#	Target	11.4533	0.1776	9.0288	0.1163	9.3224	0.2231	8.6026	1.205	8.2927	0.8626	8.0088	0.8242	10.4105	0.5418	9.3641	0.589	10.2328	0.8158	10.6483	0.9384	9.971	0.9951	7.5067	0.1276	10.1034	0.6062	7.8081	0.1671	7.8946	0.2765	10.308	0.3075	9.6666	0.1145	9.2758	0.0466	10.3816	0.2964	7.6846	0.3967	7.0051	0.0988	7.363	0.2063	8.6323	0.4843	8.4002	0.0823
HSA-MIR-1179	Target									17.4037	0.8626	17.5698	0.8242									17.403	0.9951			18.0834	0.6062	17.1191	0.1671	18.7546	0.2765			19.3056	0.1145	18.1428	0.0466			17.6656	0.3967	18.4881	0.0988	19.84	0.2063	18.9733	0.4843	17.8012	0.0823
HSA-MIR-1180	Target			11.3718	0.1163	14.3994	0.2231	10.3556	1.205	10.5427	0.8626	12.5618	0.8242	13.6285	0.5418	12.2221	0.589	11.7688	0.8158	15.1773	0.9384	13.164	0.9951	12.3897	0.1276	12.4974	0.6062	14.5941	0.1671	11.6226	0.2765	15.287	0.3075	13.6626	0.1145	11.8728	0.0466			11.3696	0.3967	10.7481	0.0988	11.828	0.2063	12.6443	0.4843	12.8222	0.0823
HSA-MIR-1183	Target									12.4307	0.8626																			12.4136	0.2765			14.7466	0.1145											14.3273	0.4843
HSA-MIR-1184	Target			14.5918	0.1163	15.6754	0.2231																													16.9328	0.0466			16.0976	0.3967	15.5801	0.0988	16.225	0.2063
HSA-MIR-1201	Target			11.8388	0.1163	11.7764	0.2231	16.3396	1.205	13.9707	0.8626	12.1568	0.8242	13.3155	0.5418	13.8941	0.589	14.5978	0.8158	14.7763	0.9384			11.5557	0.1276	11.2404	0.6062	12.7111	0.1671	9.9296	0.2765	10.912	0.3075	12.1686	0.1145	11.0048	0.0466	12.4056	0.2964	11.4036	0.3967	10.0741	0.0988	10.825	0.2063	12.5533	0.4843
HSA-MIR-1208	Target							14.2386	1.205													13.581	0.9951					16.0021	0.1671
hsa-miR-122	Target			10.9408	0.1163			9.3216	1.205																							12.832	0.3075	12.1526	0.1145											11.5923	0.4843
HSA-MIR-1225-3P	Target									17.4027	0.8626					17.0421	0.589											19.2131	0.1671
HSA-MIR-1226#	Target			13.5778	0.1163	17.2064	0.2231					14.2038	0.8242	18.9035	0.5418	14.8001	0.589							16.8687	0.1276	17.1624	0.6062	14.1031	0.1671	13.7406	0.2765			14.6126	0.1145					17.4336	0.3967
HSA-MIR-1227	Target			13.6128	0.1163	13.8014	0.2231			15.2407	0.8626	15.0288	0.8242	14.5745	0.5418	17.5311	0.589	15.4258	0.8158	16.6893	0.9384			11.4277	0.1276	13.4514	0.6062	14.1041	0.1671	13.6726	0.2765	15.827	0.3075	14.9066	0.1145	14.1218	0.0466	14.6206	0.2964	13.4516	0.3967	13.1841	0.0988	14.216	0.2063	13.3663	0.4843	13.1672	0.0823
HSA-MIR-1233	Target							12.5936	1.205							11.7171	0.589			12.8383	0.9384							10.7581	0.1671
HSA-MIR-1243	Target							16.9696	1.205
HSA-MIR-1244	Target			15.1068	0.1163	15.0224	0.2231	15.2156	1.205	15.5067	0.8626							15.2198	0.8158					14.7507	0.1276	14.9324	0.6062	15.3121	0.1671	13.1796	0.2765	13.395	0.3075			14.5908	0.0466	15.9966	0.2964	18.0746	0.3967	14.5821	0.0988	16.274	0.2063	16.1823	0.4843	13.6852	0.0823
HSA-MIR-1247	Target			10.4418	0.1163	9.4224	0.2231			12.7897	0.8626	10.9528	0.8242			13.6351	0.589	10.9028	0.8158	15.1373	0.9384	14.079	0.9951	11.6947	0.1276			14.1601	0.1671	11.9256	0.2765	14.9	0.3075	13.0336	0.1145			13.7746	0.2964					11.57	0.2063	12.3733	0.4843	12.7222	0.0823
HSA-MIR-1248	Target			16.0118	0.1163																			16.0047	0.1276					15.0646	0.2765					18.3958	0.0466			18.0746	0.3967	16.8881	0.0988	18.819	0.2063	18.7843	0.4843	16.6922	0.0823
HSA-MIR-1249	Target							16.6036	1.205
HSA-MIR-1250	Target
HSA-MIR-1254	Target			12.0088	0.1163	17.6384	0.2231	12.8406	1.205	12.0367	0.8626	12.9618	0.8242	18.9465	0.5418	13.5541	0.589	17.9278	0.8158	14.1773	0.9384					18.0834	0.6062	13.1761	0.1671	18.7546	0.2765	17.371	0.3075	19.3056	0.1145	18.3958	0.0466	15.2246	0.2964	14.1576	0.3967	18.4881	0.0988	19.84	0.2063	18.9733	0.4843	13.0802	0.0823
HSA-MIR-1255A	Target											17.5698	0.8242									15.921	0.9951
HSA-MIR-1255B	Target			13.4107	0.1163	13.7084	0.2231			13.0967	0.8626	14.4958	0.8242	15.3395	0.5418	13.4721	0.589	12.7348	0.8158			15.064	0.9951	13.7487	0.1276	14.3584	0.6062	17.2201	0.1671	17.6136	0.2765	15.492	0.3075	15.2566	0.1145	13.9598	0.0466	17.4076	0.2964	14.0466	0.3967	13.0031	0.0988	14.097	0.2063	15.4153	0.4843	13.6942	0.0823
HSA-MIR-1256	Target															18.6431	0.589															17.649	0.3075									18.4881	0.0988
hsa-miR-125a-3p	Target							13.1126	1.205	13.7777	0.8626			15.4795	0.5418	15.4241	0.589	14.1468	0.8158	14.9743	0.9384	14.205	0.9951	13.5937	0.1276	14.9464	0.6062	14.1321	0.1671	13.9886	0.2765	16.988	0.3075	15.6316	0.1145	13.9938	0.0466	15.5246	0.2964	13.7816	0.3967	15.5501	0.0988	15.051	0.2063
hsa-miR-125a-5p	Target	10.5463	0.1776	6.8168	0.1163	6.2714	0.2231	5.2476	1.205	4.1837	0.8626	6.4778	0.8242	6.7445	0.5418	6.0651	0.589	6.1808	0.8158	3.1073	0.9384	5.199	0.9951	5.4517	0.1276	5.3124	0.6062	6.5751	0.1671	6.7296	0.2765	5.556	0.3075	6.3426	0.1145	6.2368	0.0466	5.8406	0.2964	5.5316	0.3967	5.8831	0.0988	5.091	0.2063	7.5193	0.4843	8.1972	0.0823
hsa-miR-125b	Target			0.8628	0.1163	1.2584	0.2231	0.1386	1.205	-0.3493	0.8626	0.6048	0.8242	1.3565	0.5418	1.4931	0.589	0.5838	0.8158	2.6573	0.9384	0.041	0.9951	2.2007	0.1276	0.5144	0.6062	2.6081	0.1671	1.6976	0.2765	3.235	0.3075	3.0836	0.1145	1.1148	0.0466	3.9276	0.2964	0.6726	0.3967	0.7411	0.0988	1.39	0.2063	1.5503	0.4843	2.3802	0.0823
hsa-miR-125b-1#	Target			11.0187	0.1163	12.5434	0.2231	11.2076	1.205	11.4017	0.8626	11.1048	0.8242	11.9855	0.5418	12.5761	0.589	11.3408	0.8158	15.1803	0.9384	11.872	0.9951	9.9527	0.1276	12.2874	0.6062	11.8571	0.1671	10.0476	0.2765	14.733	0.3075	11.6916	0.1145	11.6548	0.0466	14.1106	0.2964	11.1116	0.3967	10.8061	0.0988	11.895	0.2063	11.4573	0.4843	10.8142	0.0823
hsa-miR-125b-2#	Target																							17.4977	0.1276
hsa-miR-126	Target	13.6533	0.1776	10.6078	0.1163	10.8894	0.2231	9.8206	1.205	9.4487	0.8626	10.3368	0.8242	9.9495	0.5418	10.4891	0.589	10.7488	0.8158	11.3013	0.9384	9.213	0.9951	8.2887	0.1276	11.6164	0.6062	8.2291	0.1671	9.3756	0.2765	9.818	0.3075	8.8436	0.1145	9.3258	0.0466	11.6676	0.2964	7.6206	0.3967	8.1271	0.0988	7.541	0.2063	8.5703	0.4843	9.8952	0.0823
hsa-miR-126#	Target			13.2797	0.1163	14.2754	0.2231	16.9696	1.205	16.1357	0.8626	14.2938	0.8242	16.4195	0.5418	18.7261	0.589					17.679	0.9951	14.5817	0.1276			14.3001	0.1671	12.7586	0.2765			14.2876	0.1145	13.9678	0.0466			12.3286	0.3967	12.6601	0.0988	12.412	0.2063	14.3993	0.4843	15.8032	0.0823
HSA-MIR-1260	Target	11.7823	0.1776	7.7258	0.1163	9.3334	0.2231	10.9556	1.205	10.2517	0.8626	9.9848	0.8242	10.8385	0.5418	10.7781	0.589	11.1258	0.8158	10.5793	0.9384	10.642	0.9951	5.0057	0.1276	7.9504	0.6062	5.8821	0.1671	5.7316	0.2765	8.641	0.3075	8.9806	0.1145	7.3758	0.0466	8.0866	0.2964	8.0816	0.3967	7.7471	0.0988	8.653	0.2063	7.8803	0.4843	8.1702	0.0823
HSA-MIR-1262	Target																					15.972	0.9951					18.0551	0.1671			16.777	0.3075									15.9111	0.0988
HSA-MIR-1267	Target			14.4038	0.1163	14.7534	0.2231							14.5245	0.5418	13.1671	0.589	11.0468	0.8158					15.1247	0.1276	11.1044	0.6062	17.2931	0.1671	13.1856	0.2765									9.2446	0.3967	9.3201	0.0988	11.814	0.2063
HSA-MIR-1269	Target																	15.7958	0.8158			17.081	0.9951													16.1028	0.0466					16.3011	0.0988					15.6762	0.0823
hsa-miR-127	Target			4.0827	0.1163	5.3514	0.2231	8.3806	1.205	9.0437	0.8626	7.3748	0.8242	5.8845	0.5418	7.5451	0.589	7.2818	0.8158	8.5003	0.9384	5.54	0.9951	5.4747	0.1276	6.2454	0.6062	5.5611	0.1671	4.4656	0.2765	7.88	0.3075	5.6846	0.1145	4.5248	0.0466	7.4936	0.2964	5.0976	0.3967	4.6011	0.0988	5.099	0.2063	6.8923	0.4843	5.6612	0.0823
hsa-miR-127-5p	Target			14.0217	0.1163							16.6488	0.8242			15.7821	0.589					15.125	0.9951	14.6467	0.1276			17.7561	0.1671	14.5266	0.2765					15.8488	0.0466							18.405	0.2063
HSA-MIR-1270	Target					12.6894	0.2231					12.6558	0.8242	13.9705	0.5418	13.1211	0.589			14.8023	0.9384			14.2077	0.1276			14.5861	0.1671			17.649	0.3075	13.6616	0.1145			14.9636	0.2964							13.8103	0.4843
HSA-MIR-1271	Target			13.0797	0.1163	11.4664	0.2231	9.8886	1.205	11.1877	0.8626	10.5048	0.8242	11.3305	0.5418	11.4771	0.589	11.5308	0.8158	11.1163	0.9384	11.666	0.9951	10.2327	0.1276	11.2264	0.6062	12.3201	0.1671	11.0656	0.2765	13.977	0.3075	10.9716	0.1145	11.0628	0.0466	10.9336	0.2964	10.9536	0.3967	11.7411	0.0988	11.166	0.2063	11.9783	0.4843	10.9962	0.0823
HSA-MIR-1274A	Target			2.0748	0.1163	4.5154	0.2231	3.1766	1.205	2.9967	0.8626	3.6208	0.8242	4.6315	0.5418	4.4651	0.589	5.3948	0.8158	5.8023	0.9384	3.416	0.9951	-0.6263	0.1276	3.3164	0.6062	1.3641	0.1671	-0.1194	0.2765	3.693	0.3075	4.1636	0.1145	2.2448	0.0466	2.3576	0.2964	3.1176	0.3967	2.4431	0.0988	3.121	0.2063	3.4873	0.4843	3.0582	0.0823
HSA-MIR-1274B	Target	6.4892	0.1776	2.1217	0.1163	2.8664	0.2231	0.4736	1.205	0.8837	0.8626	1.8158	0.8242	2.6335	0.5418	0.8681	0.589	1.0238	0.8158	2.9193	0.9384	0.066	0.9951	-1.9953	0.1276	0.9734	0.6062	0.9341	0.1671	-0.7054	0.2765	2.143	0.3075	3.9906	0.1145	1.1968	0.0466	0.7546	0.2964	2.4116	0.3967	0.8971	0.0988	1.42	0.2063	1.1163	0.4843	0.6502	0.0823
HSA-MIR-1275	Target			8.0787	0.1163	7.9664	0.2231	7.0776	1.205	7.5707	0.8626	7.7178	0.8242	8.7765	0.5418	8.0711	0.589	7.4348	0.8158	7.6003	0.9384	6.063	0.9951	8.1047	0.1276	7.2484	0.6062	9.2771	0.1671	6.7536	0.2765	8.028	0.3075	8.3006	0.1145	7.6638	0.0466	7.5346	0.2964	6.6216	0.3967	7.2281	0.0988	8.421	0.2063	9.3543	0.4843	9.2492	0.0823
HSA-MIR-1276	Target							15.6816	1.205											17.6023	0.9384
HSA-MIR-1282	Target									17.4037	0.8626	17.5698	0.8242															15.8041	0.1671											18.0746	0.3967
HSA-MIR-1285	Target																																					17.4076	0.2964
HSA-MIR-1289	Target							16.9406	1.205
hsa-miR-128a	Target			9.7047	0.1163	11.2274	0.2231	12.5696	1.205	11.6957	0.8626	10.9108	0.8242	11.6195	0.5418	11.3771	0.589	10.6358	0.8158	13.9153	0.9384	10.87	0.9951	11.9637	0.1276	11.6684	0.6062	11.6081	0.1671	11.4426	0.2765	14.042	0.3075	12.3976	0.1145	11.4808	0.0466	14.1846	0.2964	10.0536	0.3967	10.3321	0.0988	11.289	0.2063	11.9073	0.4843	11.5442	0.0823
hsa-miR-129	Target																											15.7291	0.1671
hsa-miR-129#	Target			17.4378	0.1163			16.0136	1.205			17.5698	0.8242									16.18	0.9951			17.2284	0.6062	16.8281	0.1671	15.3846	0.2765													19.459	0.2063
HSA-MIR-1290	Target	12.4203	0.1776	13.3407	0.1163	15.0384	0.2231	13.5896	1.205	15.9217	0.8626	15.5618	0.8242	18.9465	0.5418			16.5128	0.8158	15.3953	0.9384			12.8357	0.1276	14.8214	0.6062	15.8591	0.1671	12.9546	0.2765	12.996	0.3075	16.1786	0.1145			11.9046	0.2964					18.233	0.2063	14.2633	0.4843	11.3042	0.0823
HSA-MIR-1291	Target			12.4968	0.1163	13.4934	0.2231	13.9616	1.205	14.2377	0.8626	13.7748	0.8242	17.7015	0.5418	16.6501	0.589	16.9398	0.8158			16.036	0.9951			15.1104	0.6062	15.2901	0.1671	13.0266	0.2765			14.3286	0.1145	14.4188	0.0466	15.7796	0.2964	13.3696	0.3967	14.2041	0.0988	14.425	0.2063	15.0803	0.4843	12.8812	0.0823
HSA-MIR-1293	Target
HSA-MIR-1300	Target							14.6506	1.205	17.4037	0.8626			16.5705	0.5418	15.5041	0.589			17.6303	0.9384	16.037	0.9951	13.7857	0.1276	15.2694	0.6062	16.4081	0.1671	13.1216	0.2765	17.349	0.3075	15.3266	0.1145	17.2348	0.0466					15.0471	0.0988	18.189	0.2063	18.2313	0.4843	13.8262	0.0823
HSA-MIR-1303	Target																							14.2037	0.1276	15.1984	0.6062	15.1601	0.1671															14.518	0.2063
HSA-MIR-1305	Target																											19.4101	0.1671
hsa-miR-130a	Target			7.0387	0.1163	7.8354	0.2231	8.4496	1.205	8.0567	0.8626	7.2968	0.8242	8.6545	0.5418	8.2421	0.589	5.5228	0.8158	12.8563	0.9384	8.127	0.9951	7.3987	0.1276	8.4864	0.6062	6.4111	0.1671	4.7586	0.2765	11.898	0.3075	9.2066	0.1145	7.3418	0.0466	11.5226	0.2964	6.5426	0.3967	5.9671	0.0988	6.611	0.2063	6.3823	0.4843	6.7292	0.0823
hsa-miR-130b	Target			8.8248	0.1163	8.8844	0.2231	13.0716	1.205	15.1917	0.8626	10.9098	0.8242	10.1525	0.5418	10.7851	0.589	11.3628	0.8158	13.5623	0.9384	10.142	0.9951	10.0707	0.1276	11.0414	0.6062	9.9571	0.1671	8.4306	0.2765	14.093	0.3075	10.1906	0.1145	9.0688	0.0466	11.7996	0.2964	7.9836	0.3967	7.8601	0.0988	8.396	0.2063	9.5923	0.4843	8.8802	0.0823
hsa-miR-130b#	Target					11.0624	0.2231	10.8096	1.205															11.4447	0.1276									11.6026	0.1145			12.4086	0.2964
hsa-miR-132	Target			4.9227	0.1163	6.1434	0.2231							5.7775	0.5418	7.8561	0.589	9.1758	0.8158	9.8573	0.9384	6.146	0.9951	6.6687	0.1276	7.2634	0.6062	5.8921	0.1671	5.2486	0.2765	7.461	0.3075	5.8226	0.1145	4.9028	0.0466	6.7406	0.2964	5.2136	0.3967	4.2921	0.0988	4.963	0.2063	6.5363	0.4843	7.0722	0.0823
hsa-miR-132#	Target																													17.2656	0.2765
HSA-MIR-1324	Target													16.4845	0.5418
hsa-miR-133a	Target			11.3697	0.1163	11.2464	0.2231	14.4816	1.205			13.5828	0.8242	12.1875	0.5418	11.9881	0.589					10.197	0.9951	10.9537	0.1276	11.7474	0.6062	13.4901	0.1671			12.348	0.3075	9.9156	0.1145	10.7468	0.0466	11.9366	0.2964			9.5141	0.0988	10.666	0.2063	11.2423	0.4843	12.4102	0.0823
hsa-miR-135a	Target																													16.7076	0.2765			17.9746	0.1145
hsa-miR-135b	Target					14.2014	0.2231	14.3956	1.205			15.9908	0.8242	14.6165	0.5418							17.679	0.9951	14.4707	0.1276			14.9171	0.1671	18.4536	0.2765			15.6576	0.1145	17.4518	0.0466							16.822	0.2063	13.7353	0.4843	13.0842	0.0823
hsa-miR-136	Target																							15.1697	0.1276			15.8151	0.1671																	15.8013	0.4843	16.0792	0.0823
hsa-miR-136#	Target			11.6528	0.1163	12.3114	0.2231	15.0536	1.205	12.7027	0.8626	12.1848	0.8242	15.4755	0.5418	14.3181	0.589	12.1148	0.8158	16.5193	0.9384	12.952	0.9951	10.9237	0.1276	12.6014	0.6062	11.2241	0.1671	8.9016	0.2765			14.7436	0.1145	12.6188	0.0466	15.1626	0.2964	13.9346	0.3967	11.9051	0.0988	12.561	0.2063	11.0643	0.4843	11.2472	0.0823
hsa-miR-138	Target	10.4503	0.1776	7.2208	0.1163	6.4104	0.2231	6.3126	1.205	6.7127	0.8626	8.6558	0.8242	6.5125	0.5418	7.3031	0.589	7.0798	0.8158	7.9153	0.9384	6.272	0.9951	7.1067	0.1276	7.5424	0.6062	5.6601	0.1671	5.2956	0.2765	7.322	0.3075	6.3226	0.1145	6.4178	0.0466	7.9126	0.2964	5.3526	0.3967	7.1471	0.0988	8.049	0.2063	6.3333	0.4843	6.2172	0.0823
hsa-miR-139-5p	Target			12.0737	0.1163	13.7094	0.2231	14.1986	1.205	15.8927	0.8626	14.2448	0.8242	12.0725	0.5418	14.2671	0.589	17.2088	0.8158	13.4073	0.9384	13.696	0.9951	13.0547	0.1276	14.6394	0.6062	12.2181	0.1671	12.2766	0.2765	12.781	0.3075	11.7176	0.1145	12.1548	0.0466	13.5196	0.2964	11.8956	0.3967	12.2001	0.0988	13.06	0.2063	12.9403	0.4843	13.5202	0.0823
hsa-miR-140-3p	Target	13.6533	0.1776					13.1276	1.205			12.7178	0.8242	10.1555	0.5418	11.7161	0.589	12.1048	0.8158	10.8263	0.9384	10.699	0.9951	9.2227	0.1276	11.1564	0.6062	9.0951	0.1671	10.2026	0.2765	11.88	0.3075	10.7026	0.1145	11.6728	0.0466	12.6786	0.2964	11.0886	0.3967	10.5881	0.0988	10.104	0.2063
hsa-miR-141	Target											15.1508	0.8242	16.2005	0.5418											17.0164	0.6062	15.7671	0.1671	15.6156	0.2765															13.6853	0.4843	15.8832	0.0823
hsa-miR-142-3p	Target			14.2247	0.1163	16.4924	0.2231							16.4255	0.5418	17.5861	0.589	12.4098	0.8158									15.9061	0.1671	14.7776	0.2765															12.9383	0.4843	15.9562	0.0823
hsa-miR-142-5p	Target																																															18.4352	0.0823
hsa-miR-143	Target			4.7887	0.1163	6.4724	0.2231	7.5856	1.205	5.9007	0.8626	7.0138	0.8242	8.0325	0.5418	8.0001	0.589	4.7538	0.8158	10.1413	0.9384	5.407	0.9951	7.0617	0.1276	6.3454	0.6062	5.8321	0.1671	4.0036	0.2765	12.54	0.3075	6.6106	0.1145	5.4468	0.0466	10.4536	0.2964	5.3956	0.3967	5.0741	0.0988	5.43	0.2063	7.7873	0.4843	7.9842	0.0823
hsa-miR-144#	Target																	17.1208	0.8158											17.9996	0.2765
hsa-miR-145	Target	13.3693	0.1776	1.5367	0.1163	2.9174	0.2231	3.9446	1.205	5.3847	0.8626	4.1668	0.8242	3.8375	0.5418	5.0581	0.589	4.5808	0.8158	3.8633	0.9384	1.342	0.9951	4.5877	0.1276	1.7564	0.6062	3.9471	0.1671	3.2726	0.2765	7.974	0.3075	2.2436	0.1145	1.4838	0.0466	4.6456	0.2964	1.7526	0.3967	2.2911	0.0988	2.954	0.2063	7.9123	0.4843
hsa-miR-145#	Target			12.7148	0.1163			13.5176	1.205	12.6687	0.8626	14.4658	0.8242	18.9465	0.5418	15.8471	0.589	12.6558	0.8158	17.6303	0.9384	11.536	0.9951	15.2987	0.1276	11.7194	0.6062	15.7351	0.1671	12.4336	0.2765	17.649	0.3075	15.0856	0.1145	13.1818	0.0466			16.3306	0.3967	12.3361	0.0988	13.888	0.2063	18.9733	0.4843
hsa-miR-146a	Target	8.9773	0.1776	4.6287	0.1163	3.4524	0.2231	9.4366	1.205	8.0057	0.8626	5.0048	0.8242	5.7435	0.5418	5.0831	0.589	4.5508	0.8158	9.9883	0.9384	8.023	0.9951	4.2637	0.1276	7.0534	0.6062	3.7061	0.1671	3.2866	0.2765	3.007	0.3075	6.3866	0.1145	4.5378	0.0466	5.1916	0.2964	7.4476	0.3967	5.7271	0.0988	3.313	0.2063	7.5333	0.4843	9.3372	0.0823
hsa-miR-146b	Target	12.0403	0.1776	7.9957	0.1163	7.1574	0.2231	7.8196	1.205	6.7907	0.8626	7.1258	0.8242	8.3085	0.5418	7.5771	0.589	6.5718	0.8158	9.5103	0.9384	8.297	0.9951	7.0967	0.1276	8.6014	0.6062	8.3301	0.1671	7.8976	0.2765	8.819	0.3075	9.2276	0.1145	8.9478	0.0466	9.5876	0.2964	8.4296	0.3967	7.2691	0.0988	5.989	0.2063	6.3663	0.4843	7.2272	0.0823
hsa-miR-146b-3p	Target																																			18.3958	0.0466							16.793	0.2063	14.5343	0.4843	16.1602	0.0823
hsa-miR-148a	Target			8.0778	0.1163	8.3074	0.2231	6.9846	1.205	6.3737	0.8626	7.4158	0.8242	9.2875	0.5418	8.9451	0.589	6.9078	0.8158	10.7513	0.9384	6.914	0.9951	9.4797	0.1276	7.6854	0.6062	8.7211	0.1671	7.5976	0.2765	12.21	0.3075	9.7876	0.1145	8.8498	0.0466	11.4706	0.2964	8.5796	0.3967	8.1411	0.0988	8.082	0.2063	8.6883	0.4843	8.9552	0.0823
hsa-miR-148b	Target			10.9887	0.1163	11.6174	0.2231	13.5776	1.205	14.9037	0.8626	12.3578	0.8242	12.0505	0.5418	13.7031	0.589	12.4668	0.8158	14.2283	0.9384	11.934	0.9951	11.6327	0.1276	13.7744	0.6062	12.0281	0.1671	10.9056	0.2765	14.326	0.3075	12.2346	0.1145	12.2958	0.0466	13.2806	0.2964	11.0016	0.3967	10.2931	0.0988	10.432	0.2063	10.7093	0.4843	11.6192	0.0823
hsa-miR-148b#	Target			17.4378	0.1163	16.7014	0.2231	15.5086	1.205	14.9457	0.8626	14.4548	0.8242	18.9465	0.5418	16.6411	0.589	14.7258	0.8158			16.006	0.9951	13.7477	0.1276	16.0044	0.6062	14.9701	0.1671	14.4336	0.2765			16.7436	0.1145	16.4198	0.0466			17.9106	0.3967	16.2381	0.0988	15.058	0.2063	14.2803	0.4843	15.0772	0.0823
hsa-miR-149	Target	12.5373	0.1776	6.9287	0.1163	7.1674	0.2231	5.2176	1.205	4.5997	0.8626	6.5858	0.8242	6.7255	0.5418	6.3111	0.589	6.9628	0.8158	5.1433	0.9384	5.017	0.9951	7.8707	0.1276	5.5124	0.6062	8.1631	0.1671	7.8816	0.2765	8.893	0.3075	6.1386	0.1145	6.7268	0.0466	8.6076	0.2964	5.9756	0.3967	5.9541	0.0988	6.659	0.2063	8.8723	0.4843	7.9922	0.0823
hsa-miR-150	Target			12.6238	0.1163	13.1564	0.2231	16.8866	1.205	17.4037	0.8626	17.1248	0.8242	13.0935	0.5418	16.6771	0.589	15.1118	0.8158	12.7113	0.9384	13.585	0.9951			15.5024	0.6062	13.9281	0.1671	14.5596	0.2765	11.91	0.3075	11.8736	0.1145	12.1878	0.0466	15.5866	0.2964	12.4026	0.3967	12.9091	0.0988	14.723	0.2063	12.3053	0.4843	13.3412	0.0823
hsa-miR-151-3p	Target			8.6658	0.1163	9.8054	0.2231	8.1026	1.205	9.0867	0.8626	7.6578	0.8242			11.2981	0.589	7.9528	0.8158	11.1233	0.9384	9.474	0.9951	8.0347	0.1276	9.1894	0.6062	7.8331	0.1671	7.9566	0.2765	10.18	0.3075	11.1046	0.1145	11.2648	0.0466	10.3196	0.2964	9.9236	0.3967	9.1241	0.0988	9.219	0.2063	10.0793	0.4843	8.2752	0.0823
HSA-MIR-151-5P	Target			9.0838	0.1163	9.6804	0.2231	9.1466	1.205	9.4097	0.8626	9.0778	0.8242	11.5435	0.5418	10.1331	0.589	9.5568	0.8158	11.9283	0.9384	9.511	0.9951	9.9487	0.1276	10.4224	0.6062	11.5881	0.1671	9.1586	0.2765	12.051	0.3075	11.1156	0.1145	9.6018	0.0466	11.6556	0.2964	9.7966	0.3967	8.9071	0.0988	9.496	0.2063	10.7473	0.4843	11.6362	0.0823
hsa-miR-152	Target			4.7507	0.1163	5.0144	0.2231	5.9256	1.205	5.0197	0.8626	5.2128	0.8242	5.1285	0.5418	5.2701	0.589	4.6758	0.8158	9.7113	0.9384	4.828	0.9951	5.6557	0.1276	5.9794	0.6062	5.2321	0.1671	4.9706	0.2765	8.322	0.3075	5.4286	0.1145	5.0048	0.0466	7.8096	0.2964	4.4206	0.3967	4.4991	0.0988	4.657	0.2063	4.6533	0.4843	5.0512	0.0823
hsa-miR-154	Target											15.3048	0.8242			15.8721	0.589	16.6118	0.8158					14.4517	0.1276	15.6854	0.6062	14.0821	0.1671	12.6496	0.2765											13.1271	0.0988	13.783	0.2063	14.6093	0.4843	14.3942	0.0823
hsa-miR-154#	Target			14.4607	0.1163	14.7144	0.2231	13.4516	1.205	13.5647	0.8626	14.5328	0.8242	15.0635	0.5418	15.7241	0.589	14.5768	0.8158			12.994	0.9951	13.3727	0.1276	13.9184	0.6062	15.5181	0.1671	12.4636	0.2765			15.5186	0.1145	14.9788	0.0466			14.8676	0.3967	12.5191	0.0988	13.969	0.2063	15.0203	0.4843	15.8062	0.0823
hsa-miR-155	Target	11.5873	0.1776	6.6968	0.1163	6.1054	0.2231	5.2726	1.205	3.7467	0.8626	5.4208	0.8242	5.5525	0.5418	4.2021	0.589	3.6848	0.8158	7.0243	0.9384	7.233	0.9951	5.6217	0.1276	8.5344	0.6062	8.0921	0.1671	7.7246	0.2765	8.348	0.3075	8.0486	0.1145	8.7138	0.0466	9.1686	0.2964	6.0516	0.3967	6.4321	0.0988	6.185	0.2063	5.6323	0.4843	6.0162	0.0823
hsa-miR-155#	Target																													18.7546	0.2765
hsa-miR-15a	Target			10.7028	0.1163	10.7154	0.2231	14.6026	1.205	15.7217	0.8626	13.0328	0.8242	12.0045	0.5418	12.8271	0.589	12.0498	0.8158			11.769	0.9951	10.1487	0.1276	13.4714	0.6062	10.2291	0.1671	9.6416	0.2765	13.863	0.3075	12.1476	0.1145	12.1418	0.0466			10.1706	0.3967	9.6641	0.0988	9.512	0.2063	9.0983	0.4843	10.3122	0.0823
hsa-miR-15a#	Target			17.1718	0.1163					14.2387	0.8626	16.2638	0.8242											14.2787	0.1276			15.6231	0.1671	14.6286	0.2765	17.649	0.3075									14.1271	0.0988	16.436	0.2063	15.6963	0.4843	18.4352	0.0823
hsa-miR-15b	Target			5.8888	0.1163	5.9394	0.2231	8.7226	1.205	9.6447	0.8626	7.7298	0.8242	6.0765	0.5418	7.0161	0.589	6.9418	0.8158	9.8623	0.9384	6.566	0.9951	6.6617	0.1276	7.6634	0.6062	7.3061	0.1671	6.3326	0.2765	10.483	0.3075	7.2116	0.1145	6.1958	0.0466	9.3076	0.2964	4.9976	0.3967	5.0131	0.0988	5.806	0.2063	6.8803	0.4843	6.5122	0.0823
hsa-miR-15b#	Target			10.6478	0.1163	11.1984	0.2231	11.0636	1.205	10.5327	0.8626	11.0568	0.8242	11.3405	0.5418	9.8431	0.589	10.1518	0.8158			11.746	0.9951			11.9214	0.6062	12.8151	0.1671	11.1856	0.2765													10.912	0.2063			11.3942	0.0823
hsa-miR-16	Target	11.8292	0.1776	4.9077	0.1163	4.5024	0.2231	5.6186	1.205	5.2297	0.8626	5.4298	0.8242	4.7925	0.5418	4.3801	0.589	3.9958	0.8158	6.7443	0.9384	4.777	0.9951	3.7087	0.1276	6.1354	0.6062	4.4591	0.1671	4.7896	0.2765	6.309	0.3075	5.2146	0.1145	5.2408	0.0466	6.4246	0.2964	3.2756	0.3967	3.8601	0.0988	3.657	0.2063	3.6893	0.4843	4.2662	0.0823
hsa-miR-16-1#	Target									15.0217	0.8626	14.3738	0.8242	16.0825	0.5418	15.5771	0.589	15.4338	0.8158			13.833	0.9951	12.0667	0.1276			14.4391	0.1671	12.2276	0.2765	15.854	0.3075	16.5766	0.1145					15.6266	0.3967	13.8581	0.0988	14.332	0.2063	13.2283	0.4843	13.5782	0.0823
hsa-miR-17	Target			4.9137	0.1163	5.0854	0.2231	4.9046	1.205	4.2247	0.8626	5.0718	0.8242	6.2985	0.5418	5.1851	0.589	3.5998	0.8158	6.1033	0.9384	4.647	0.9951	4.0567	0.1276	5.5934	0.6062	4.1381	0.1671	3.4026	0.2765	4.89	0.3075	5.6506	0.1145	5.3128	0.0466	6.7116	0.2964	3.4316	0.3967	3.4151	0.0988	3.658	0.2063	6.1143	0.4843	4.7112	0.0823
hsa-miR-17#	Target															18.8901	0.589	17.9278	0.8158									19.4101	0.1671	18.7546	0.2765	17.649	0.3075	19.3056	0.1145									19.84	0.2063			18.4352	0.0823
hsa-miR-181a	Target			7.7337	0.1163	8.6734	0.2231	11.6386	1.205			10.0848	0.8242	8.9425	0.5418	11.1231	0.589	10.1118	0.8158	12.2603	0.9384	8.7	0.9951	7.7057	0.1276	9.4444	0.6062	6.9341	0.1671			8.9	0.3075	9.4226	0.1145	7.7228	0.0466	10.4956	0.2964	7.4886	0.3967	7.3111	0.0988	7.196	0.2063	8.6233	0.4843	8.1112	0.0823
hsa-miR-181a-2#	Target			11.4777	0.1163	12.4404	0.2231	11.0226	1.205	11.8457	0.8626	11.5418	0.8242	11.1255	0.5418	11.6781	0.589	12.2598	0.8158	11.1953	0.9384	10.82	0.9951	10.9087	0.1276	10.6454	0.6062	10.7691	0.1671	9.8616	0.2765	10.964	0.3075	11.1316	0.1145	10.5198	0.0466	11.2316	0.2964	10.3556	0.3967	10.4011	0.0988	10.443	0.2063	12.3933	0.4843	11.1662	0.0823
hsa-miR-181c	Target			14.4188	0.1163	14.9374	0.2231	12.9526	1.205	12.2257	0.8626	12.6108	0.8242					12.2398	0.8158	15.9763	0.9384							13.5461	0.1671					15.3456	0.1145					13.7046	0.3967			14.148	0.2063	13.9653	0.4843
hsa-miR-181c#	Target					12.3134	0.2231											10.9538	0.8158									12.8141	0.1671																	12.4843	0.4843	12.1132	0.0823
hsa-miR-184	Target			14.1618	0.1163	15.6744	0.2231					17.5698	0.8242	14.7075	0.5418	17.0611	0.589			15.6593	0.9384	16.574	0.9951	15.4877	0.1276	18.0834	0.6062	13.4981	0.1671	12.1886	0.2765	15.188	0.3075	14.8086	0.1145	14.0238	0.0466			14.9796	0.3967	14.9051	0.0988			16.2663	0.4843
hsa-miR-185	Target			8.5847	0.1163	9.1024	0.2231	10.7676	1.205	9.2907	0.8626	8.9298	0.8242	9.5535	0.5418	8.8951	0.589	7.8048	0.8158	12.0513	0.9384	9.071	0.9951	9.4437	0.1276	9.4164	0.6062	9.5241	0.1671	8.5366	0.2765	10.836	0.3075	9.4996	0.1145	8.6388	0.0466	11.6356	0.2964	8.1466	0.3967	8.1211	0.0988	8.406	0.2063	9.5263	0.4843	9.8012	0.0823
hsa-miR-186	Target			8.4547	0.1163	7.9944	0.2231	8.1546	1.205	6.7017	0.8626	7.6398	0.8242	8.0055	0.5418	8.0361	0.589	7.5108	0.8158	7.4053	0.9384	8.354	0.9951	6.2047	0.1276	7.4514	0.6062	5.7421	0.1671	6.8556	0.2765	9.82	0.3075	7.7906	0.1145	8.3678	0.0466	9.4896	0.2964	7.6206	0.3967	7.9451	0.0988	5.62	0.2063	7.2033	0.4843	7.2392	0.0823
hsa-miR-18a	Target			11.1727	0.1163	12.0764	0.2231	13.1496	1.205	17.2297	0.8626	13.6278	0.8242	13.9015	0.5418	12.6411	0.589	12.3098	0.8158	15.3883	0.9384	12.133	0.9951	11.9087	0.1276	13.2664	0.6062	12.1291	0.1671	10.1986	0.2765	13.609	0.3075	13.3006	0.1145	12.5728	0.0466	14.6586	0.2964	11.2106	0.3967	10.9741	0.0988	12.366	0.2063	12.8033	0.4843	12.2502	0.0823
hsa-miR-18a#	Target					17.1354	0.2231	15.1376	1.205	17.4037	0.8626	14.6458	0.8242	16.4775	0.5418	15.9581	0.589	15.0888	0.8158	16.8243	0.9384	17.679	0.9951	16.9307	0.1276	16.0004	0.6062	16.7091	0.1671	15.0176	0.2765			16.8296	0.1145	17.5178	0.0466	15.0996	0.2964	16.8156	0.3967	18.1761	0.0988	17.982	0.2063			18.4352	0.0823
hsa-miR-190	Target			14.2067	0.1163	14.7284	0.2231	14.5866	1.205	15.4387	0.8626	14.9188	0.8242			16.1801	0.589	14.0598	0.8158					13.9297	0.1276			13.9821	0.1671	12.6286	0.2765									14.1486	0.3967	12.7411	0.0988	18.008	0.2063	13.6873	0.4843	13.0112	0.0823
hsa-miR-190b	Target															17.1031	0.589	16.5608	0.8158					14.5097	0.1276	15.3694	0.6062	17.8641	0.1671	16.2066	0.2765	16.257	0.3075			17.6848	0.0466			16.4326	0.3967	17.5831	0.0988	16.498	0.2063	17.8613	0.4843
hsa-miR-191	Target	3.1623	0.1776	2.6027	0.1163	2.7264	0.2231	3.3806	1.205	2.4507	0.8626	2.8418	0.8242	2.4625	0.5418	2.0101	0.589	2.8978	0.8158	3.8703	0.9384	2.467	0.9951	2.5897	0.1276	3.2954	0.6062	2.8581	0.1671	2.9656	0.2765	2.989	0.3075	2.8836	0.1145	2.7158	0.0466	3.5786	0.2964	2.7136	0.3967	2.6091	0.0988	2.248	0.2063	3.3053	0.4843	2.9562	0.0823
HSA-MIR-191#	Target			17.4378	0.1163	17.6384	0.2231	16.0166	1.205	17.1067	0.8626	17.5698	0.8242	18.0515	0.5418	16.8681	0.589	17.9278	0.8158	17.6303	0.9384	17.679	0.9951	15.5007	0.1276			16.4701	0.1671	15.6266	0.2765			18.6136	0.1145	17.5898	0.0466					15.0261	0.0988	17.62	0.2063	17.9803	0.4843	18.4352	0.0823
hsa-miR-192	Target			11.2118	0.1163	12.0204	0.2231	16.9696	1.205	14.3127	0.8626	12.4168	0.8242	12.8015	0.5418	13.7581	0.589	14.4548	0.8158	14.3873	0.9384	11.885	0.9951	12.7307	0.1276	13.5464	0.6062	12.1401	0.1671	11.5096	0.2765	12.388	0.3075	12.0946	0.1145	11.7878	0.0466	13.6956	0.2964	13.2436	0.3967	10.9821	0.0988	10.928	0.2063	10.6453	0.4843	11.6082	0.0823
hsa-miR-192#	Target					17.6384	0.2231							18.1995	0.5418															18.7546	0.2765					18.3958	0.0466			18.0746	0.3967	18.4881	0.0988	19.752	0.2063
hsa-miR-193a-3p	Target			17.4108	0.1163	16.9844	0.2231	15.3106	1.205			14.8138	0.8242	17.9005	0.5418	17.0281	0.589	15.1858	0.8158	16.7583	0.9384			13.1577	0.1276			15.6541	0.1671	16.0646	0.2765	17.649	0.3075	16.8136	0.1145	18.3928	0.0466	17.4076	0.2964	17.4516	0.3967	16.4501	0.0988	16.764	0.2063	14.1603	0.4843	14.6872	0.0823
hsa-miR-193a-5p	Target			5.3127	0.1163	5.3244	0.2231	3.5726	1.205	3.8087	0.8626	4.4368	0.8242	5.3085	0.5418	5.6151	0.589	4.1888	0.8158	4.4133	0.9384	4.193	0.9951	5.3577	0.1276	4.2154	0.6062	5.8351	0.1671	5.7536	0.2765	5.611	0.3075	5.8086	0.1145	5.2388	0.0466	6.0636	0.2964	4.5836	0.3967	4.6731	0.0988	5.026	0.2063	6.1193	0.4843	6.0602	0.0823
hsa-miR-193b	Target	7.4812	0.1776	2.8227	0.1163	2.4744	0.2231	2.0586	1.205	1.1687	0.8626	2.3518	0.8242	2.7905	0.5418	3.2691	0.589	2.0708	0.8158	1.3833	0.9384	1.513	0.9951	2.4117	0.1276	1.8944	0.6062	2.8581	0.1671	2.5096	0.2765	3.274	0.3075	2.9006	0.1145	2.5608	0.0466	3.0416	0.2964	2.6906	0.3967	2.5011	0.0988	3.033	0.2063	2.6873	0.4843	3.2442	0.0823
hsa-miR-193b#	Target			9.9928	0.1163	10.4974	0.2231	8.9176	1.205	9.1727	0.8626	9.4118	0.8242	10.4965	0.5418	10.5071	0.589	10.5968	0.8158	8.6183	0.9384	8.884	0.9951	10.0597	0.1276	9.4024	0.6062	10.5351	0.1671	10.4846	0.2765	9.572	0.3075	9.9856	0.1145	10.0978	0.0466	9.2226	0.2964	10.0006	0.3967	9.6611	0.0988	10.96	0.2063	10.9503	0.4843	11.4082	0.0823
hsa-miR-194	Target			12.4627	0.1163	13.1454	0.2231	11.5936	1.205	11.2427	0.8626	11.6928	0.8242	13.4465	0.5418	12.7651	0.589	11.6508	0.8158	13.6763	0.9384	10.289	0.9951	13.1057	0.1276	11.0214	0.6062	13.3761	0.1671	12.5096	0.2765	12.918	0.3075	12.5486	0.1145	13.0638	0.0466	13.6666	0.2964	11.9706	0.3967	11.9541	0.0988	12.243	0.2063	12.5763	0.4843	13.0942	0.0823
hsa-miR-195	Target			6.6867	0.1163	6.8874	0.2231	6.8726	1.205	5.8377	0.8626	7.7968	0.8242	7.7885	0.5418	7.6061	0.589	6.2998	0.8158	8.1193	0.9384	5.478	0.9951	8.3097	0.1276	5.6374	0.6062	7.8951	0.1671	7.2826	0.2765	10.222	0.3075	8.8496	0.1145	7.6608	0.0466	11.2516	0.2964	8.1726	0.3967	7.8001	0.0988	7.918	0.2063	7.4163	0.4843	8.6502	0.0823
hsa-miR-195#	Target																																													18.9733	0.4843
hsa-miR-196b	Target	12.6812	0.1776	9.2498	0.1163	9.3564	0.2231	8.0856	1.205	7.6727	0.8626	8.5548	0.8242	10.0355	0.5418	9.2111	0.589	8.6768	0.8158	7.9483	0.9384	7.811	0.9951	7.7397	0.1276	8.8624	0.6062	8.5511	0.1671	8.8776	0.2765	10.863	0.3075	8.3556	0.1145	8.9248	0.0466	10.3796	0.2964	8.1356	0.3967	8.4031	0.0988	8.123	0.2063	8.1733	0.4843	9.1322	0.0823
hsa-miR-197	Target			7.6248	0.1163	7.9214	0.2231	6.5086	1.205	6.7637	0.8626	7.1808	0.8242	6.9285	0.5418	7.8971	0.589			4.7973	0.9384	6.698	0.9951	7.2097	0.1276	7.6704	0.6062	6.8261	0.1671			7.231	0.3075	6.4216	0.1145	7.5908	0.0466	7.6496	0.2964	6.5776	0.3967	8.0681	0.0988	8.238	0.2063	7.8653	0.4843
hsa-miR-198	Target			12.3237	0.1163	12.4144	0.2231	13.1026	1.205	13.5337	0.8626	13.6508	0.8242									12.031	0.9951	11.7977	0.1276	12.9764	0.6062	14.0771	0.1671	13.3566	0.2765	14.251	0.3075	14.4766	0.1145			15.4736	0.2964							13.8103	0.4843	13.6432	0.0823
hsa-miR-199a	Target			9.5417	0.1163	10.1814	0.2231	9.5456	1.205	8.6797	0.8626	9.2268	0.8242	11.1645	0.5418	10.5541	0.589	7.9598	0.8158	14.2643	0.9384	9.447	0.9951	10.4607	0.1276	9.0614	0.6062	11.6741	0.1671	9.8336	0.2765	12.549	0.3075	12.3146	0.1145	10.0668	0.0466	15.2676	0.2964	9.5156	0.3967	8.4661	0.0988	9.121	0.2063	10.8363	0.4843	10.8152	0.0823
hsa-miR-199a-3p	Target			3.1407	0.1163	2.9494	0.2231	4.0076	1.205	3.4987	0.8626	3.5908	0.8242	3.5625	0.5418	3.7831	0.589	2.7428	0.8158	6.1043	0.9384	3.234	0.9951	2.8867	0.1276	3.9394	0.6062	3.5031	0.1671	3.3296	0.2765	5.739	0.3075	4.4486	0.1145	3.6158	0.0466	6.0456	0.2964	2.2366	0.3967	2.2571	0.0988	1.754	0.2063	2.6373	0.4843	2.4642	0.0823
hsa-miR-199b	Target			12.1248	0.1163	10.9924	0.2231	12.1206	1.205	10.3377	0.8626	11.4138	0.8242	12.0085	0.5418	11.8361	0.589	8.7718	0.8158	17.2353	0.9384	12.281	0.9951	11.2207	0.1276	11.2444	0.6062	14.6311	0.1671	11.9276	0.2765			15.1806	0.1145	13.1378	0.0466	15.5836	0.2964	11.7416	0.3967	11.1021	0.0988	10.989	0.2063	11.1853	0.4843	11.2202	0.0823
hsa-miR-19a	Target			10.6308	0.1163	10.7604	0.2231	9.5266	1.205	8.7867	0.8626	9.9878	0.8242	11.5375	0.5418	10.5541	0.589	8.3958	0.8158	12.0033	0.9384	10.074	0.9951	8.8597	0.1276	10.4904	0.6062	9.1341	0.1671	7.6166	0.2765	12.166	0.3075	12.3776	0.1145	11.1558	0.0466	12.9476	0.2964	9.6216	0.3967	9.1881	0.0988	9.16	0.2063	9.3493	0.4843	9.2662	0.0823
hsa-miR-19b	Target	11.0523	0.1776	3.9017	0.1163	4.2574	0.2231	5.0556	1.205	3.5457	0.8626	4.4348	0.8242	4.7615	0.5418	4.1241	0.589	2.8558	0.8158	7.4693	0.9384	4.26	0.9951	3.1777	0.1276	4.5574	0.6062	2.9941	0.1671	1.9416	0.2765	4.87	0.3075	5.3606	0.1145	4.4078	0.0466	6.5626	0.2964	2.5896	0.3967	2.3291	0.0988	2.606	0.2063	3.2003	0.4843	3.3512	0.0823
hsa-miR-19b-1#	Target			15.1068	0.1163	16.9024	0.2231			16.6297	0.8626					17.9301	0.589	16.6848	0.8158			17.656	0.9951	14.1157	0.1276	16.8504	0.6062	17.7081	0.1671	14.5996	0.2765	17.649	0.3075	19.3056	0.1145			17.4076	0.2964	15.9756	0.3967	14.7911	0.0988	17.333	0.2063	17.2403	0.4843	15.9152	0.0823
hsa-miR-200a#	Target													18.5705	0.5418
hsa-miR-200b	Target											13.0818	0.8242					12.6038	0.8158	14.3403	0.9384			12.8307	0.1276			14.1251	0.1671			14.591	0.3075											15.054	0.2063
hsa-miR-200c	Target			11.1837	0.1163					10.5147	0.8626	11.3378	0.8242					17.9278	0.8158									12.8091	0.1671	11.6396	0.2765			12.1946	0.1145	12.1148	0.0466					11.8431	0.0988	11.813	0.2063	12.5983	0.4843	12.4282	0.0823
hsa-miR-202	Target					15.8914	0.2231	15.4646	1.205					17.9035	0.5418	17.9251	0.589					14.681	0.9951	16.8167	0.1276	15.0304	0.6062	17.3241	0.1671													16.0951	0.0988			14.8503	0.4843	15.7792	0.0823
hsa-miR-203	Target			11.9137	0.1163	13.0834	0.2231	15.9476	1.205	14.4787	0.8626	15.5188	0.8242	11.6395	0.5418	13.1241	0.589	12.9248	0.8158	14.9713	0.9384	11.865	0.9951	12.6997	0.1276	12.1954	0.6062	16.1001	0.1671	15.5576	0.2765	14.878	0.3075	11.5776	0.1145	10.1758	0.0466	12.3646	0.2964	8.9716	0.3967	8.6911	0.0988	8.829	0.2063	11.2083	0.4843	13.7442	0.0823
hsa-miR-204	Target			7.7567	0.1163	7.7874	0.2231					10.5118	0.8242	4.8075	0.5418	6.1881	0.589	7.5208	0.8158	11.0233	0.9384	8.222	0.9951	11.5767	0.1276	9.5764	0.6062	4.5471	0.1671	5.7656	0.2765	11.724	0.3075	7.4156	0.1145	6.8488	0.0466	9.1106	0.2964	5.4606	0.3967	5.6481	0.0988	5.96	0.2063	9.0463	0.4843	8.1922	0.0823
hsa-miR-205	Target																									13.6584	0.6062															14.6501	0.0988
hsa-miR-206	Target			13.1628	0.1163			16.0636	1.205	15.1057	0.8626			16.4545	0.5418	15.1991	0.589	15.2048	0.8158			13.722	0.9951	14.3987	0.1276	13.7104	0.6062	15.7671	0.1671	13.8696	0.2765	14.84	0.3075	15.6036	0.1145	13.2598	0.0466			12.9496	0.3967	13.7311	0.0988	14.304	0.2063	14.1943	0.4843	16.2012	0.0823
hsa-miR-208	Target																	15.1318	0.8158																							16.0831	0.0988
hsa-miR-20a	Target			6.0978	0.1163	5.8234	0.2231	4.2946	1.205	3.8577	0.8626	4.7298	0.8242	6.7955	0.5418	5.6051	0.589	3.5648	0.8158	7.1543	0.9384	4.692	0.9951	5.3587	0.1276	5.4844	0.6062	5.4911	0.1671	4.4326	0.2765	5.699	0.3075	7.1716	0.1145	6.2908	0.0466	7.9446	0.2964	4.4326	0.3967	4.3751	0.0988	4.612	0.2063	6.1593	0.4843	6.0402	0.0823
hsa-miR-20a#	Target			15.4257	0.1163	15.7074	0.2231	14.9516	1.205	16.3457	0.8626			17.0235	0.5418			13.3798	0.8158	15.8553	0.9384	15.958	0.9951	13.7247	0.1276			13.7831	0.1671	12.2296	0.2765	17.649	0.3075	16.3966	0.1145	15.7288	0.0466	14.6366	0.2964	14.2836	0.3967	13.6991	0.0988	14.334	0.2063	15.3603	0.4843	17.4522	0.0823
hsa-miR-20b	Target			14.0028	0.1163	12.9214	0.2231	13.2786	1.205	11.9677	0.8626	11.9518	0.8242	14.1445	0.5418	12.9741	0.589	10.9028	0.8158	14.6183	0.9384	15.294	0.9951	13.0627	0.1276	17.7424	0.6062	13.0341	0.1671	11.7976	0.2765	14.285	0.3075	15.5616	0.1145	17.9608	0.0466	17.4076	0.2964	15.0756	0.3967	13.4291	0.0988	11.336	0.2063	14.2853	0.4843	16.1012	0.0823
hsa-miR-21	Target			3.0337	0.1163	3.0604	0.2231	4.1846	1.205	1.7997	0.8626	2.6088	0.8242	4.3415	0.5418	3.7491	0.589	0.5808	0.8158	7.1663	0.9384	2.02	0.9951	3.5257	0.1276	2.2004	0.6062	3.0071	0.1671	1.2366	0.2765	6.369	0.3075	5.8196	0.1145			6.5746	0.2964	3.3186	0.3967	2.3641	0.0988	1.608	0.2063	2.1973	0.4843	4.2132	0.0823
hsa-miR-21#	Target			14.0688	0.1163							14.8378	0.8242					14.3868	0.8158					13.0037	0.1276			13.2021	0.1671	11.6196	0.2765			17.7586	0.1145			16.1446	0.2964					14.865	0.2063	13.8143	0.4843	12.1632	0.0823
hsa-miR-210	Target			7.3647	0.1163	7.8694	0.2231	6.0326	1.205	8.5407	0.8626	8.7508	0.8242	6.3705	0.5418	8.4471	0.589	8.2198	0.8158	5.2583	0.9384	6.3	0.9951	3.9157	0.1276	7.6814	0.6062	4.4351	0.1671	6.4506	0.2765	7.772	0.3075	4.9866	0.1145	7.1288	0.0466	9.6786	0.2964	4.1966	0.3967	7.1061	0.0988	7.327	0.2063	4.2723	0.4843	6.1692	0.0823
hsa-miR-211	Target
hsa-miR-212	Target			8.7468	0.1163	9.5844	0.2231	10.3086	1.205	9.8027	0.8626	10.2098	0.8242	9.6675	0.5418	9.8591	0.589	9.5928	0.8158	10.0463	0.9384	8.413	0.9951	10.1657	0.1276	8.7954	0.6062	9.0011	0.1671	8.0206	0.2765	12.142	0.3075	9.4326	0.1145	8.0918	0.0466	9.8466	0.2964	8.5246	0.3967	7.3941	0.0988	8.574	0.2063	9.6263	0.4843	9.9912	0.0823
hsa-miR-213	Target			14.8888	0.1163	16.4624	0.2231	14.0436	1.205	12.2527	0.8626	13.0378	0.8242	14.7685	0.5418	13.3611	0.589	12.2178	0.8158	15.9653	0.9384	11.884	0.9951	12.6327	0.1276	12.9744	0.6062	14.2191	0.1671	12.5766	0.2765	14.413	0.3075	14.5896	0.1145	13.1938	0.0466	17.4076	0.2964	14.2166	0.3967	12.3561	0.0988	13.291	0.2063			14.7172	0.0823
hsa-miR-214	Target	7.8182	0.1776	4.1667	0.1163	3.9844	0.2231	3.4446	1.205	2.7137	0.8626	3.6958	0.8242	3.0825	0.5418	4.0481	0.589	3.0298	0.8158	4.1313	0.9384	2.989	0.9951	3.5977	0.1276	3.2364	0.6062	4.0501	0.1671	4.3736	0.2765	5.232	0.3075	4.2096	0.1145	4.0678	0.0466	6.2876	0.2964	3.2816	0.3967	2.8481	0.0988	2.915	0.2063	5.1473	0.4843	3.5262	0.0823
hsa-miR-214#	Target			12.2808	0.1163	12.6624	0.2231	11.4976	1.205	11.0327	0.8626	10.5788	0.8242	12.5245	0.5418	11.4981	0.589	10.0958	0.8158	15.7193	0.9384	13.429	0.9951	10.1597	0.1276	12.5324	0.6062	12.3941	0.1671	11.3796	0.2765	14.932	0.3075	13.7526	0.1145	12.2088	0.0466	16.1676	0.2964	13.4306	0.3967	10.8211	0.0988	10.486	0.2063	12.0903	0.4843	10.8162	0.0823
hsa-miR-215	Target									11.7547	0.8626	12.6808	0.8242			13.4631	0.589							14.3637	0.1276			13.7071	0.1671			14.814	0.3075
hsa-miR-216a	Target													16.5225	0.5418													14.7921	0.1671
hsa-miR-216b	Target					17.1224	0.2231							17.9035	0.5418																			16.8486	0.1145							15.7261	0.0988	15.944	0.2063	17.2103	0.4843
hsa-miR-217	Target																					17.679	0.9951					18.1511	0.1671	18.7546	0.2765					18.3958	0.0466					18.4881	0.0988	18.86	0.2063
hsa-miR-218	Target			7.3508	0.1163	8.7204	0.2231			9.3497	0.8626	9.9908	0.8242	8.2635	0.5418	10.0971	0.589	9.8028	0.8158			9.187	0.9951	8.5257	0.1276	10.4834	0.6062	7.4521	0.1671	8.3776	0.2765	11.206	0.3075	7.5836	0.1145	9.5358	0.0466	13.7756	0.2964			8.0811	0.0988	8.52	0.2063	7.4683	0.4843	6.9872	0.0823
hsa-miR-218-2#	Target																											17.0071	0.1671																			16.8932	0.0823
hsa-miR-219	Target																													16.7186	0.2765
hsa-miR-219-1-3p	Target									17.4037	0.8626			18.6105	0.5418																	16.639	0.3075
hsa-miR-22	Target			5.5718	0.1163	6.4154	0.2231	7.9086	1.205	6.7647	0.8626	6.4388	0.8242	7.0215	0.5418	6.8111	0.589	5.1148	0.8158			5.19	0.9951	6.6017	0.1276	6.3484	0.6062	6.0211	0.1671	4.4166	0.2765	8.339	0.3075	7.3706	0.1145	5.7048	0.0466			5.5386	0.3967	4.8491	0.0988	5.567	0.2063	5.6833	0.4843	6.4772	0.0823
hsa-miR-22#	Target			11.7977	0.1163	11.9614	0.2231	10.3456	1.205	11.1047	0.8626	11.6218	0.8242	10.9685	0.5418	11.6021	0.589	10.4698	0.8158	12.8453	0.9384	10.941	0.9951	9.8297	0.1276	11.8834	0.6062	11.4021	0.1671	9.6636	0.2765	12.737	0.3075	11.4936	0.1145	11.5218	0.0466	13.2376	0.2964	9.6896	0.3967	9.9971	0.0988	10.898	0.2063	10.6613	0.4843	10.0312	0.0823
hsa-miR-221	Target	13.6533	0.1776	1.9067	0.1163	2.2884	0.2231	1.3536	1.205	1.0567	0.8626	1.7708	0.8242	2.8015	0.5418	2.6901	0.589	1.6388	0.8158	4.1073	0.9384	1.642	0.9951	3.4917	0.1276	1.9254	0.6062	3.5831	0.1671	2.4596	0.2765	4.5	0.3075	3.5326	0.1145	2.0988	0.0466	5.1776	0.2964	1.5156	0.3967	1.8301	0.0988	2.995	0.2063	5.1453	0.4843	3.2492	0.0823
hsa-miR-221#	Target			14.7668	0.1163	17.2674	0.2231	15.0996	1.205			16.3468	0.8242			16.1591	0.589	15.0338	0.8158			16.87	0.9951	17.1157	0.1276	18.0834	0.6062	17.8451	0.1671	14.6946	0.2765			19.3056	0.1145	17.2918	0.0466					15.7041	0.0988	18.191	0.2063	16.6983	0.4843	16.6992	0.0823
hsa-miR-222	Target	8.0993	0.1776	-0.5732	0.1163	-0.7816	0.2231	-2.2094	1.205	-2.2883	0.8626	-1.0862	0.8242	-0.9065	0.5418	-0.7449	0.589	-0.7712	0.8158	-1.2447	0.9384	-0.603	0.9951	-1.4613	0.1276	-0.0316	0.6062			-0.9244	0.2765	-0.165	0.3075	-0.5864	0.1145	-0.1712	0.0466	1.1586	0.2964	-1.0084	0.3967	-0.6319	0.0988					-0.9928	0.0823
hsa-miR-222#	Target	12.9542	0.1776	11.2588	0.1163	11.5714	0.2231	10.2056	1.205	9.1657	0.8626	10.6358	0.8242	11.1285	0.5418	10.7541	0.589	8.6558	0.8158	11.9783	0.9384	10.593	0.9951	6.4457	0.1276	11.0024	0.6062	7.7501	0.1671	6.9136	0.2765	11.947	0.3075	11.2876	0.1145	11.1608	0.0466	11.9176	0.2964	10.4216	0.3967	10.1111	0.0988	10.372	0.2063	9.7673	0.4843	8.4682	0.0823
hsa-miR-223	Target			10.0688	0.1163	11.2984	0.2231	11.4546	1.205	12.2327	0.8626	11.1798	0.8242	11.3925	0.5418	12.0641	0.589	13.8318	0.8158	11.6723	0.9384	10.95	0.9951	17.5757	0.1276	12.4624	0.6062	11.6581	0.1671	16.5306	0.2765	11.836	0.3075	10.1666	0.1145	11.8698	0.0466	12.6126	0.2964			11.9521	0.0988	13.402	0.2063	10.5803	0.4843	13.6522	0.0823
hsa-miR-224	Target			5.9377	0.1163	7.1094	0.2231	8.3186	1.205	8.0337	0.8626	8.8738	0.8242	8.3885	0.5418	9.5631	0.589	9.7828	0.8158	9.6793	0.9384	7.752	0.9951	9.0877	0.1276	8.7664	0.6062	8.4311	0.1671	8.1416	0.2765	9.793	0.3075	7.9576	0.1145	6.7788	0.0466	8.7286	0.2964	6.8526	0.3967	6.4401	0.0988	6.768	0.2063	9.8333	0.4843	10.1632	0.0823
hsa-miR-23a	Target											6.7728	0.8242
hsa-miR-23a#	Target									15.3547	0.8626															16.0954	0.6062			15.6896	0.2765	15.704	0.3075			14.6068	0.0466			16.2956	0.3967	16.4771	0.0988	18.204	0.2063
hsa-miR-23b	Target					7.6484	0.2231			6.9777	0.8626	7.2298	0.8242	8.5615	0.5418	6.8871	0.589			10.5083	0.9384			8.4487	0.1276	6.3754	0.6062	8.7121	0.1671	8.0746	0.2765	9.429	0.3075	10.4976	0.1145									8.648	0.2063
hsa-miR-24	Target	5.2703	0.1776	0.0488	0.1163	0.0274	0.2231	0.6946	1.205	-0.4393	0.8626	0.6038	0.8242	0.4765	0.5418	0.5131	0.589	0.2208	0.8158	1.7063	0.9384	-0.702	0.9951	-0.7593	0.1276	0.1914	0.6062	-0.6099	0.1671	-0.8294	0.2765	1.228	0.3075	0.9646	0.1145	0.0798	0.0466	2.1596	0.2964	-0.0434	0.3967	0.1241	0.0988	-0.027	0.2063	-0.9767	0.4843	0.0472	0.0823
hsa-miR-24-1#	Target																											15.9711	0.1671
hsa-miR-24-2#	Target			11.2597	0.1163	12.6484	0.2231	11.2446	1.205	11.2317	0.8626	11.2638	0.8242	13.3515	0.5418	12.1031	0.589	11.7688	0.8158	13.8063	0.9384	11.473	0.9951	10.7437	0.1276	11.8504	0.6062	12.2621	0.1671	9.8506	0.2765	15.82	0.3075	13.0726	0.1145	12.0418	0.0466	14.6266	0.2964	13.3926	0.3967	11.9671	0.0988	12.224	0.2063	11.9093	0.4843	11.7812	0.0823
hsa-miR-25	Target			8.5527	0.1163	8.4304	0.2231	8.6236	1.205	8.9977	0.8626	9.2628	0.8242	9.0575	0.5418	9.2241	0.589	8.7318	0.8158	11.1333	0.9384	8.488	0.9951	10.1827	0.1276	9.2104	0.6062	9.4281	0.1671	8.9056	0.2765	10.935	0.3075	9.3266	0.1145	8.7878	0.0466	10.8906	0.2964			7.6991	0.0988	8.4	0.2063	8.2893	0.4843	9.9292	0.0823
hsa-miR-25#	Target													15.4575	0.5418					14.5703	0.9384			14.8137	0.1276			14.4351	0.1671
hsa-miR-26a	Target			3.9867	0.1163	3.6724	0.2231	3.1636	1.205	2.3327	0.8626	3.4098	0.8242	4.4615	0.5418	4.2431	0.589	3.2548	0.8158	5.7413	0.9384	2.802	0.9951	4.2667	0.1276	3.0314	0.6062	4.5441	0.1671	3.6806	0.2765	6.385	0.3075	5.5816	0.1145	4.1758	0.0466	6.8446	0.2964	3.5926	0.3967	3.0601	0.0988	3.418	0.2063	4.4323	0.4843	4.9432	0.0823
[truncated: 299 more rows]
[truncated: 10 more columns]

## Sheet: 2 TO (-Delta CT)
DataAssist Software v3.0
[truncated: 508 more rows]

[truncated: 1 more sheets: Fold Change]
