# Supplementary material for: Signature of microRNA expression during osteogenic differentiation of bone marrow MSCs reveals a putative role of miR-335-5p in osteoarthritis
Source: BMC Musculoskelet Disord. 2015 Aug 5;16:182. doi: 10.1186/s12891-015-0652-9 (PMC4526194; doi:10.1186/s12891-015-0652-9)
Supplement: Additional file 6: — Extraction of all the experimentally validated microRNA-target interactions for hsa-miR-210 and hsa-miR-335-5p from the miRTarBase database. An extraction of miR-335 target genes related to the WNT pathway was also included. These belong to the Wnt signaling pathway, according to the enriched annotations provided in the Kyoto Encyclopedia of Genes and Genomes (KEGG) 04310. (XLS 2121 kb) [file 12891_2015_652_MOESM6_ESM.xls]

## Sheet: miRTarBase
				miRTarBase
				The experimentally validated microRNA-target interactions database.
				Browse the database !!
				Homo sapiens miRTarBase Download (All features) Release 4.5 (Excel format *.xls)							hsa_MTI.xls
				¨	miR-210-3p extraction
				¨	miR-335-5p extraction
				¨	miR-335-5p targets belonging to the WNT Pathway
					DISCLAIMER
					Because miRTarBase data are licensed for academic use free of charge, in no event shall any member of the miRTarBase development team be liable to any party for direct, indirect, special, incidental, or consequential damages arising out of the use of the miRTarBase database, even if the miRTarBase team has been advised of the possibility of such damages.
					To the extent permitted by law, miRTarBase specifically disclaims any warranties, including, but not limited to, the implied warranties of merchantability and fitness for a particular purpose. miRTarBase is provided "as is" without warranty of any kind. We assume no obligation to provide maintenance, support, updates, enhancements, or modifications.

## Sheet: miR-210-3p
miRTarBase ID	miRNA	Species (miRNA)	Target Gene	Target Gene (Entrez ID)	Species (Target Gene)	Experiments	Support Type	References (PMID)
MIRT000149	hsa-miR-210-3p	Homo sapiens	HOXA9	3205	Homo sapiens	Luciferase reporter assay	Functional MTI	19782034
MIRT000150	hsa-miR-210-3p	Homo sapiens	TP53I11	9537	Homo sapiens	Luciferase reporter assay	Functional MTI	19782034
MIRT000151	hsa-miR-210-3p	Homo sapiens	PIM1	5292	Homo sapiens	Luciferase reporter assay	Functional MTI	19782034
MIRT000152	hsa-miR-210-3p	Homo sapiens	HOXA1	3198	Homo sapiens	Luciferase reporter assay	Functional MTI	19782034
MIRT000153	hsa-miR-210-3p	Homo sapiens	FGFRL1	53834	Homo sapiens	Luciferase reporter assay//Microarray//qRT-PCR//Western blot	Functional MTI	21044961
MIRT000153	hsa-miR-210-3p	Homo sapiens	FGFRL1	53834	Homo sapiens	Luciferase reporter assay	Functional MTI	19782034
MIRT000156	hsa-miR-210-3p	Homo sapiens	RAD52	5893	Homo sapiens	Luciferase reporter assay//qRT-PCR//Western blot	Functional MTI	19141645
MIRT000156	hsa-miR-210-3p	Homo sapiens	RAD52	5893	Homo sapiens	immunoprecipitaion//qRT-PCR	Functional MTI (Weak)	19826008
MIRT001930	hsa-miR-210-3p	Homo sapiens	NPTX1	4884	Homo sapiens	Luciferase reporter assay	Functional MTI	18539147
MIRT001930	hsa-miR-210-3p	Homo sapiens	NPTX1	4884	Homo sapiens	immunoprecipitaion//qRT-PCR	Functional MTI (Weak)	19826008
MIRT002024	hsa-miR-210-3p	Homo sapiens	EFNA3	1944	Homo sapiens	Luciferase reporter assay	Functional MTI	18539147
MIRT002024	hsa-miR-210-3p	Homo sapiens	EFNA3	1944	Homo sapiens	Luciferase reporter assay//Reporter assay;Other	Functional MTI	18417479
MIRT002024	hsa-miR-210-3p	Homo sapiens	EFNA3	1944	Homo sapiens	immunoprecipitaion//qRT-PCR	Functional MTI (Weak)	19826008
MIRT002024	hsa-miR-210-3p	Homo sapiens	EFNA3	1944	Homo sapiens	Luciferase reporter assay//Western blot	Functional MTI	19551852
MIRT002024	hsa-miR-210-3p	Homo sapiens	EFNA3	1944	Homo sapiens	Luciferase reporter assay//Western blot	Functional MTI	23322395
MIRT006519	hsa-miR-210-3p	Homo sapiens	CASP8AP2	9994	Homo sapiens	Luciferase reporter assay	Functional MTI	19721136
MIRT003155	hsa-miR-210-3p	Homo sapiens	P4HB	5034	Homo sapiens	2DGE//immunoprecipitaion//Mass spectrometry//Microarray//qRT-PCR//Western blot	Functional MTI	19826008
MIRT003154	hsa-miR-210-3p	Homo sapiens	PTPN1	5770	Homo sapiens	2DGE//immunoprecipitaion//Luciferase reporter assay//Mass spectrometry//Microarray//qRT-PCR//Western blot	Functional MTI	19826008
MIRT003153	hsa-miR-210-3p	Homo sapiens	BDNF	627	Homo sapiens	2DGE//immunoprecipitaion//Luciferase reporter assay//Mass spectrometry//Microarray//qRT-PCR//Western blot	Functional MTI	19826008
MIRT003173	hsa-miR-210-3p	Homo sapiens	SMCHD1	23347	Homo sapiens	immunoprecipitaion//Microarray//qRT-PCR	Functional MTI (Weak)	19826008
MIRT003172	hsa-miR-210-3p	Homo sapiens	TNPO1	3842	Homo sapiens	immunoprecipitaion//Microarray//qRT-PCR	Functional MTI (Weak)	19826008
MIRT003171	hsa-miR-210-3p	Homo sapiens	XIST	7503	Homo sapiens	immunoprecipitaion//Luciferase reporter assay//Microarray//qRT-PCR	Functional MTI	19826008
MIRT003170	hsa-miR-210-3p	Homo sapiens	CBX1	10951	Homo sapiens	immunoprecipitaion//Microarray//qRT-PCR	Functional MTI (Weak)	19826008
MIRT003169	hsa-miR-210-3p	Homo sapiens	ABCB9	23457	Homo sapiens	immunoprecipitaion//Microarray//qRT-PCR	Functional MTI (Weak)	19826008
MIRT003168	hsa-miR-210-3p	Homo sapiens	CDK10	8558	Homo sapiens	immunoprecipitaion//Microarray//qRT-PCR	Functional MTI (Weak)	19826008
MIRT003167	hsa-miR-210-3p	Homo sapiens	CPEB2	132864	Homo sapiens	immunoprecipitaion//Luciferase reporter assay//Microarray//qRT-PCR	Functional MTI	19826008
MIRT003166	hsa-miR-210-3p	Homo sapiens	DENND6A	201627	Homo sapiens	immunoprecipitaion//Microarray//qRT-PCR	Functional MTI (Weak)	19826008
MIRT003165	hsa-miR-210-3p	Homo sapiens	GPD1L	23171	Homo sapiens	immunoprecipitaion//Luciferase reporter assay//Microarray//qRT-PCR	Functional MTI	19826008
MIRT003164	hsa-miR-210-3p	Homo sapiens	HOXA3	3200	Homo sapiens	immunoprecipitaion//Microarray//qRT-PCR	Functional MTI (Weak)	19826008
MIRT003163	hsa-miR-210-3p	Homo sapiens	ISCU	23479	Homo sapiens	immunoprecipitaion//Microarray//qRT-PCR	Functional MTI (Weak)	19826008
MIRT003163	hsa-miR-210-3p	Homo sapiens	ISCU	23479	Homo sapiens	Luciferase reporter assay//qRT-PCR//Western blot	Functional MTI	19808020
MIRT003163	hsa-miR-210-3p	Homo sapiens	ISCU	23479	Homo sapiens	CLASH	Functional MTI (Weak)	23622248
MIRT003162	hsa-miR-210-3p	Homo sapiens	KIAA1161	57462	Homo sapiens	immunoprecipitaion//Microarray//qRT-PCR	Functional MTI (Weak)	19826008
MIRT003161	hsa-miR-210-3p	Homo sapiens	MDGA1	266727	Homo sapiens	immunoprecipitaion//Microarray//qRT-PCR	Functional MTI (Weak)	19826008
MIRT003160	hsa-miR-210-3p	Homo sapiens	MID1IP1	58526	Homo sapiens	immunoprecipitaion//Microarray//qRT-PCR	Functional MTI (Weak)	19826008
MIRT003159	hsa-miR-210-3p	Homo sapiens	NCAM1	4684	Homo sapiens	immunoprecipitaion//Luciferase reporter assay//Microarray//qRT-PCR	Functional MTI	19826008
MIRT003158	hsa-miR-210-3p	Homo sapiens	SEH1L	81929	Homo sapiens	immunoprecipitaion//Microarray//qRT-PCR	Functional MTI (Weak)	19826008
MIRT003156	hsa-miR-210-3p	Homo sapiens	UBQLN1	29979	Homo sapiens	immunoprecipitaion//Microarray//qRT-PCR	Functional MTI (Weak)	19826008
MIRT003157	hsa-miR-210-3p	Homo sapiens	SERTAD2	9792	Homo sapiens	immunoprecipitaion//Microarray//qRT-PCR	Functional MTI (Weak)	19826008
MIRT003185	hsa-miR-210-3p	Homo sapiens	ACVR1B	91	Homo sapiens	immunoprecipitaion//qRT-PCR	Functional MTI (Weak)	19826008
MIRT003184	hsa-miR-210-3p	Homo sapiens	E2F3	1871	Homo sapiens	immunoprecipitaion//qRT-PCR	Functional MTI (Weak)	19826008
MIRT003184	hsa-miR-210-3p	Homo sapiens	E2F3	1871	Homo sapiens	Luciferase reporter assay	Functional MTI	21465485
MIRT003183	hsa-miR-210-3p	Homo sapiens	APC	324	Homo sapiens	immunoprecipitaion//Microarray//qRT-PCR	Functional MTI (Weak)	19826008
MIRT003182	hsa-miR-210-3p	Homo sapiens	ATP11C	286410	Homo sapiens	immunoprecipitaion//Microarray//qRT-PCR	Functional MTI (Weak)	19826008
MIRT003181	hsa-miR-210-3p	Homo sapiens	CHD9	80205	Homo sapiens	immunoprecipitaion//Microarray//qRT-PCR	Functional MTI (Weak)	19826008
MIRT003180	hsa-miR-210-3p	Homo sapiens	CLASP2	23122	Homo sapiens	immunoprecipitaion//Microarray//qRT-PCR	Functional MTI (Weak)	19826008
MIRT003179	hsa-miR-210-3p	Homo sapiens	DDAH1	23576	Homo sapiens	immunoprecipitaion//Luciferase reporter assay//Microarray//qRT-PCR	Functional MTI	19826008
MIRT003178	hsa-miR-210-3p	Homo sapiens	ELK3	2004	Homo sapiens	immunoprecipitaion//Microarray//qRT-PCR	Functional MTI (Weak)	19826008
MIRT003174	hsa-miR-210-3p	Homo sapiens	PTAR1	375743	Homo sapiens	immunoprecipitaion//Microarray//qRT-PCR	Functional MTI (Weak)	19826008
MIRT003175	hsa-miR-210-3p	Homo sapiens	NIPBL	25836	Homo sapiens	immunoprecipitaion//Microarray//qRT-PCR	Functional MTI (Weak)	19826008
MIRT003176	hsa-miR-210-3p	Homo sapiens	MIB1	57534	Homo sapiens	immunoprecipitaion//Microarray//qRT-PCR	Functional MTI (Weak)	19826008
MIRT003177	hsa-miR-210-3p	Homo sapiens	HECTD1	25831	Homo sapiens	immunoprecipitaion//Microarray//qRT-PCR	Functional MTI (Weak)	19826008
MIRT003916	hsa-miR-210-3p	Homo sapiens	MRE11A	4361	Homo sapiens	Western blot	Non-Functional MTI	19141645
MIRT003917	hsa-miR-210-3p	Homo sapiens	XPA	7507	Homo sapiens	Western blot	Non-Functional MTI	19141645
MIRT004672	hsa-miR-210-3p	Homo sapiens	MNT	4335	Homo sapiens	Luciferase reporter assay//qRT-PCR//Western blot	Functional MTI	19652553
MIRT006326	hsa-miR-210-3p	Homo sapiens	AIFM3	150209	Homo sapiens	Luciferase reporter assay	Functional MTI	22387901
MIRT006663	hsa-miR-210-3p	Homo sapiens	VMP1	81671	Homo sapiens	Luciferase reporter assay//Microarray//Western blot	Functional MTI	22144109
MIRT047002	hsa-miR-210-3p	Homo sapiens	PFDN2	5202	Homo sapiens	CLASH	Functional MTI (Weak)	23622248
MIRT047003	hsa-miR-210-3p	Homo sapiens	U2AF2	11338	Homo sapiens	CLASH	Functional MTI (Weak)	23622248
MIRT047004	hsa-miR-210-3p	Homo sapiens	UBA1	7317	Homo sapiens	CLASH	Functional MTI (Weak)	23622248
MIRT047005	hsa-miR-210-3p	Homo sapiens	ESPL1	9700	Homo sapiens	CLASH	Functional MTI (Weak)	23622248
MIRT047006	hsa-miR-210-3p	Homo sapiens	ACTR1A	10121	Homo sapiens	CLASH	Functional MTI (Weak)	23622248
MIRT047007	hsa-miR-210-3p	Homo sapiens	SCN1B	6324	Homo sapiens	CLASH	Functional MTI (Weak)	23622248
MIRT047008	hsa-miR-210-3p	Homo sapiens	RCC2	55920	Homo sapiens	CLASH	Functional MTI (Weak)	23622248

## Sheet: miR-335-5p
miRTarBase ID	miRNA	Species (miRNA)	Target Gene	Target Gene (Entrez ID)	Species (Target Gene)	Experiments	Support Type	References (PMID)
MIRT006447	hsa-miR-335-5p	Homo sapiens	MAPK1	5594	Homo sapiens	Immunofluorescence//Immunoprecipitaion//Luciferase reporter assay//Microarray//qRT-PCR//Western blot	Functional MTI	22382496
MIRT000666	hsa-miR-335-5p	Homo sapiens	TNC	3371	Homo sapiens	Immunohistochemistry//Luciferase reporter assay//Microarray//Microarray;Other	Functional MTI	18185580
MIRT002429	hsa-miR-335-5p	Homo sapiens	MERTK	10461	Homo sapiens	Luciferase reporter assay//Microarray//Microarray;Other	Functional MTI	18185580
MIRT002430	hsa-miR-335-5p	Homo sapiens	PTPRN2	5799	Homo sapiens	Luciferase reporter assay//Microarray//Microarray;Other	Functional MTI	18185580
MIRT002431	hsa-miR-335-5p	Homo sapiens	SOX4	6659	Homo sapiens	Immunohistochemistry//Luciferase reporter assay//Microarray//Microarray;Other	Functional MTI	18185580
MIRT006110	hsa-miR-335-5p	Homo sapiens	TFF2	7032	Homo sapiens	Microarray	Functional MTI (Weak)	18185580
MIRT006448	hsa-miR-335-5p	Homo sapiens	LRG1	116844	Homo sapiens	Immunofluorescence//Immunoprecipitaion//Luciferase reporter assay//Microarray//qRT-PCR//Western blot	Functional MTI	22382496
MIRT003230	hsa-miR-335-5p	Homo sapiens	RASA1	5921	Homo sapiens	Luciferase reporter assay	Non-Functional MTI	20065103
MIRT003229	hsa-miR-335-5p	Homo sapiens	ARPC5L	81873	Homo sapiens	Luciferase reporter assay	Non-Functional MTI	20065103
MIRT003587	hsa-miR-335-5p	Homo sapiens	RB1	5925	Homo sapiens	Luciferase reporter assay//Western blot	Functional MTI	20713524
MIRT004083	hsa-miR-335-5p	Homo sapiens	UBE2F	140739	Homo sapiens	Luciferase reporter assay	Non-Functional MTI	18185580
MIRT005888	hsa-miR-335-5p	Homo sapiens	RUNX2	860	Homo sapiens	Luciferase reporter assay//Microarray//qRT-PCR//Western blot	Functional MTI	21164520
MIRT007304	hsa-miR-335-5p	Homo sapiens	BIRC5	332	Homo sapiens	Luciferase reporter assay	Functional MTI	23232114
MIRT016695	hsa-miR-335-5p	Homo sapiens	CD69	969	Homo sapiens	Microarray	Functional MTI (Weak)	18185580
MIRT016696	hsa-miR-335-5p	Homo sapiens	DEFB126	81623	Homo sapiens	Microarray	Functional MTI (Weak)	18185580
MIRT016697	hsa-miR-335-5p	Homo sapiens	PPP1R3D	5509	Homo sapiens	Microarray	Functional MTI (Weak)	18185580
MIRT016698	hsa-miR-335-5p	Homo sapiens	ZNF609	23060	Homo sapiens	Microarray	Functional MTI (Weak)	18185580
MIRT016699	hsa-miR-335-5p	Homo sapiens	SYT12	91683	Homo sapiens	Microarray	Functional MTI (Weak)	18185580
MIRT016700	hsa-miR-335-5p	Homo sapiens	TNNI1	7135	Homo sapiens	Microarray	Functional MTI (Weak)	18185580
MIRT016701	hsa-miR-335-5p	Homo sapiens	IFNA21	3452	Homo sapiens	Microarray	Functional MTI (Weak)	18185580
MIRT016702	hsa-miR-335-5p	Homo sapiens	BSN	8927	Homo sapiens	Microarray	Functional MTI (Weak)	18185580
MIRT016703	hsa-miR-335-5p	Homo sapiens	EREG	2069	Homo sapiens	Microarray	Functional MTI (Weak)	18185580
MIRT016704	hsa-miR-335-5p	Homo sapiens	SYCP2L	221711	Homo sapiens	Microarray	Functional MTI (Weak)	18185580
MIRT016705	hsa-miR-335-5p	Homo sapiens	FBP2	8789	Homo sapiens	Microarray	Functional MTI (Weak)	18185580
MIRT016706	hsa-miR-335-5p	Homo sapiens	IL17A	3605	Homo sapiens	Microarray	Functional MTI (Weak)	18185580
MIRT016707	hsa-miR-335-5p	Homo sapiens	KCNH2	3757	Homo sapiens	Microarray	Functional MTI (Weak)	18185580
MIRT016708	hsa-miR-335-5p	Homo sapiens	SCP2D1	140856	Homo sapiens	Microarray	Functional MTI (Weak)	18185580
MIRT016709	hsa-miR-335-5p	Homo sapiens	NPY	4852	Homo sapiens	Microarray	Functional MTI (Weak)	18185580
MIRT016710	hsa-miR-335-5p	Homo sapiens	CACNB3	784	Homo sapiens	Microarray	Functional MTI (Weak)	18185580
MIRT016711	hsa-miR-335-5p	Homo sapiens	CRYGC	1420	Homo sapiens	Microarray	Functional MTI (Weak)	18185580
MIRT016712	hsa-miR-335-5p	Homo sapiens	USH1C	10083	Homo sapiens	Microarray	Functional MTI (Weak)	18185580
MIRT016713	hsa-miR-335-5p	Homo sapiens	PCDHGC4	56098	Homo sapiens	Microarray	Functional MTI (Weak)	18185580
MIRT016714	hsa-miR-335-5p	Homo sapiens	C8orf12	83656	Homo sapiens	Microarray	Functional MTI (Weak)	18185580
MIRT016715	hsa-miR-335-5p	Homo sapiens	KLRC1	3821	Homo sapiens	Microarray	Functional MTI (Weak)	18185580
MIRT016716	hsa-miR-335-5p	Homo sapiens	XKRX	402415	Homo sapiens	Microarray	Functional MTI (Weak)	18185580
MIRT016717	hsa-miR-335-5p	Homo sapiens	SIX6	4990	Homo sapiens	Microarray	Functional MTI (Weak)	18185580
MIRT016718	hsa-miR-335-5p	Homo sapiens	FAM99A	387742	Homo sapiens	Microarray	Functional MTI (Weak)	18185580
MIRT016719	hsa-miR-335-5p	Homo sapiens	HMBOX1	79618	Homo sapiens	Microarray	Functional MTI (Weak)	18185580
MIRT016720	hsa-miR-335-5p	Homo sapiens	DAZL	1618	Homo sapiens	Microarray	Functional MTI (Weak)	18185580
MIRT016721	hsa-miR-335-5p	Homo sapiens	APLP1	333	Homo sapiens	Microarray	Functional MTI (Weak)	18185580
MIRT016722	hsa-miR-335-5p	Homo sapiens	GAGE2D	729408	Homo sapiens	Microarray	Functional MTI (Weak)	18185580
MIRT016723	hsa-miR-335-5p	Homo sapiens	ADCY6	112	Homo sapiens	Microarray	Functional MTI (Weak)	18185580
MIRT016724	hsa-miR-335-5p	Homo sapiens	EFNA1	1942	Homo sapiens	Microarray	Functional MTI (Weak)	18185580
MIRT016725	hsa-miR-335-5p	Homo sapiens	OR11A1	26531	Homo sapiens	Microarray	Functional MTI (Weak)	18185580
MIRT016726	hsa-miR-335-5p	Homo sapiens	DYNC1I1	1780	Homo sapiens	Microarray	Functional MTI (Weak)	18185580
MIRT016727	hsa-miR-335-5p	Homo sapiens	DNASE1L3	1776	Homo sapiens	Microarray	Functional MTI (Weak)	18185580
MIRT016728	hsa-miR-335-5p	Homo sapiens	KDM5B	10765	Homo sapiens	Microarray	Functional MTI (Weak)	18185580
MIRT016729	hsa-miR-335-5p	Homo sapiens	TGFBR2	7048	Homo sapiens	Microarray	Functional MTI (Weak)	18185580
MIRT016730	hsa-miR-335-5p	Homo sapiens	MEF2A	4205	Homo sapiens	Microarray	Functional MTI (Weak)	18185580
MIRT016731	hsa-miR-335-5p	Homo sapiens	MIR34C	407042	Homo sapiens	Microarray	Functional MTI (Weak)	18185580
MIRT016732	hsa-miR-335-5p	Homo sapiens	TREML3P	340206	Homo sapiens	Microarray	Functional MTI (Weak)	18185580
MIRT016733	hsa-miR-335-5p	Homo sapiens	LRRC4	64101	Homo sapiens	Microarray	Functional MTI (Weak)	18185580
MIRT016734	hsa-miR-335-5p	Homo sapiens	SLC26A3	1811	Homo sapiens	Microarray	Functional MTI (Weak)	18185580
MIRT016735	hsa-miR-335-5p	Homo sapiens	DCST2	127579	Homo sapiens	Microarray	Functional MTI (Weak)	18185580
MIRT016736	hsa-miR-335-5p	Homo sapiens	ZNF641	121274	Homo sapiens	Microarray	Functional MTI (Weak)	18185580
MIRT016737	hsa-miR-335-5p	Homo sapiens	IDUA	3425	Homo sapiens	Microarray	Functional MTI (Weak)	18185580
MIRT016738	hsa-miR-335-5p	Homo sapiens	ZFAND3	60685	Homo sapiens	Microarray	Functional MTI (Weak)	18185580
MIRT016739	hsa-miR-335-5p	Homo sapiens	ZC3H11B	643136	Homo sapiens	Microarray	Functional MTI (Weak)	18185580
MIRT016740	hsa-miR-335-5p	Homo sapiens	TMPRSS12	283471	Homo sapiens	Microarray	Functional MTI (Weak)	18185580
MIRT016741	hsa-miR-335-5p	Homo sapiens	KCNH3	23416	Homo sapiens	Microarray	Functional MTI (Weak)	18185580
MIRT016742	hsa-miR-335-5p	Homo sapiens	KLRB1	3820	Homo sapiens	Microarray	Functional MTI (Weak)	18185580
MIRT016743	hsa-miR-335-5p	Homo sapiens	TTC6	319089	Homo sapiens	Microarray	Functional MTI (Weak)	18185580
MIRT016744	hsa-miR-335-5p	Homo sapiens	MMP20	9313	Homo sapiens	Microarray	Functional MTI (Weak)	18185580
MIRT016745	hsa-miR-335-5p	Homo sapiens	ARHGAP5	394	Homo sapiens	Microarray	Functional MTI (Weak)	18185580
MIRT016746	hsa-miR-335-5p	Homo sapiens	PTPRH	5794	Homo sapiens	Microarray	Functional MTI (Weak)	18185580
MIRT016747	hsa-miR-335-5p	Homo sapiens	KRTAP10-2	386679	Homo sapiens	Microarray	Functional MTI (Weak)	18185580
MIRT016748	hsa-miR-335-5p	Homo sapiens	SYNPO2	171024	Homo sapiens	Microarray	Functional MTI (Weak)	18185580
MIRT016749	hsa-miR-335-5p	Homo sapiens	GCNT2	2651	Homo sapiens	Microarray	Functional MTI (Weak)	18185580
MIRT016750	hsa-miR-335-5p	Homo sapiens	DEFB118	117285	Homo sapiens	Microarray	Functional MTI (Weak)	18185580
MIRT016751	hsa-miR-335-5p	Homo sapiens	NBEA	26960	Homo sapiens	Microarray	Functional MTI (Weak)	18185580
MIRT016752	hsa-miR-335-5p	Homo sapiens	RAB5B	5869	Homo sapiens	Microarray	Functional MTI (Weak)	18185580
MIRT016753	hsa-miR-335-5p	Homo sapiens	LHX9	56956	Homo sapiens	Microarray	Functional MTI (Weak)	18185580
MIRT016754	hsa-miR-335-5p	Homo sapiens	ALDH2	217	Homo sapiens	Microarray	Functional MTI (Weak)	18185580
MIRT016755	hsa-miR-335-5p	Homo sapiens	SLC46A3	283537	Homo sapiens	Microarray	Functional MTI (Weak)	18185580
MIRT016756	hsa-miR-335-5p	Homo sapiens	USH2A	7399	Homo sapiens	Microarray	Functional MTI (Weak)	18185580
MIRT016757	hsa-miR-335-5p	Homo sapiens	CYP21A1P	1590	Homo sapiens	Microarray	Functional MTI (Weak)	18185580
MIRT016758	hsa-miR-335-5p	Homo sapiens	WNT9A	7483	Homo sapiens	Microarray	Functional MTI (Weak)	18185580
MIRT016759	hsa-miR-335-5p	Homo sapiens	PRAMEF14	729528	Homo sapiens	Microarray	Functional MTI (Weak)	18185580
MIRT016760	hsa-miR-335-5p	Homo sapiens	VNN2	8875	Homo sapiens	Microarray	Functional MTI (Weak)	18185580
MIRT016761	hsa-miR-335-5p	Homo sapiens	DMGDH	29958	Homo sapiens	Microarray	Functional MTI (Weak)	18185580
MIRT016762	hsa-miR-335-5p	Homo sapiens	NGFR	4804	Homo sapiens	Microarray	Functional MTI (Weak)	18185580
MIRT016763	hsa-miR-335-5p	Homo sapiens	UGDH	7358	Homo sapiens	Microarray	Functional MTI (Weak)	18185580
MIRT016764	hsa-miR-335-5p	Homo sapiens	PLD4	122618	Homo sapiens	Microarray	Functional MTI (Weak)	18185580
MIRT016765	hsa-miR-335-5p	Homo sapiens	CCDC108	255101	Homo sapiens	Microarray	Functional MTI (Weak)	18185580
MIRT016766	hsa-miR-335-5p	Homo sapiens	ST6GALNAC1	55808	Homo sapiens	Microarray	Functional MTI (Weak)	18185580
MIRT016767	hsa-miR-335-5p	Homo sapiens	SEC14L4	284904	Homo sapiens	Microarray	Functional MTI (Weak)	18185580
MIRT016768	hsa-miR-335-5p	Homo sapiens	KIAA1033	23325	Homo sapiens	Microarray	Functional MTI (Weak)	18185580
MIRT016769	hsa-miR-335-5p	Homo sapiens	CCL15	6359	Homo sapiens	Microarray	Functional MTI (Weak)	18185580
MIRT016770	hsa-miR-335-5p	Homo sapiens	INHBE	83729	Homo sapiens	Microarray	Functional MTI (Weak)	18185580
MIRT016771	hsa-miR-335-5p	Homo sapiens	RXRB	6257	Homo sapiens	Microarray	Functional MTI (Weak)	18185580
MIRT016772	hsa-miR-335-5p	Homo sapiens	SYVN1	84447	Homo sapiens	Microarray	Functional MTI (Weak)	18185580
MIRT016773	hsa-miR-335-5p	Homo sapiens	CYGB	114757	Homo sapiens	Microarray	Functional MTI (Weak)	18185580
MIRT016774	hsa-miR-335-5p	Homo sapiens	ORAI3	93129	Homo sapiens	Microarray	Functional MTI (Weak)	18185580
MIRT016775	hsa-miR-335-5p	Homo sapiens	KRT72	140807	Homo sapiens	Microarray	Functional MTI (Weak)	18185580
MIRT016776	hsa-miR-335-5p	Homo sapiens	FAM110C	642273	Homo sapiens	Microarray	Functional MTI (Weak)	18185580
MIRT016777	hsa-miR-335-5p	Homo sapiens	PIP5KL1	138429	Homo sapiens	Microarray	Functional MTI (Weak)	18185580
MIRT016778	hsa-miR-335-5p	Homo sapiens	SVIL	6840	Homo sapiens	Microarray	Functional MTI (Weak)	18185580
MIRT016779	hsa-miR-335-5p	Homo sapiens	KIAA1551	55196	Homo sapiens	Microarray	Functional MTI (Weak)	18185580
MIRT016780	hsa-miR-335-5p	Homo sapiens	RIPPLY2	134701	Homo sapiens	Microarray	Functional MTI (Weak)	18185580
MIRT016781	hsa-miR-335-5p	Homo sapiens	GNMT	27232	Homo sapiens	Microarray	Functional MTI (Weak)	18185580
MIRT016782	hsa-miR-335-5p	Homo sapiens	ARHGAP12	94134	Homo sapiens	Microarray	Functional MTI (Weak)	18185580
MIRT016783	hsa-miR-335-5p	Homo sapiens	KDM4C	23081	Homo sapiens	Microarray	Functional MTI (Weak)	18185580
MIRT016784	hsa-miR-335-5p	Homo sapiens	KAAG1	353219	Homo sapiens	Microarray	Functional MTI (Weak)	18185580
MIRT016785	hsa-miR-335-5p	Homo sapiens	USP29	57663	Homo sapiens	Microarray	Functional MTI (Weak)	18185580
MIRT016786	hsa-miR-335-5p	Homo sapiens	SERPINA3	12	Homo sapiens	Microarray	Functional MTI (Weak)	18185580
MIRT016787	hsa-miR-335-5p	Homo sapiens	OR2J3	442186	Homo sapiens	Microarray	Functional MTI (Weak)	18185580
MIRT016788	hsa-miR-335-5p	Homo sapiens	GC	2638	Homo sapiens	Microarray	Functional MTI (Weak)	18185580
MIRT016789	hsa-miR-335-5p	Homo sapiens	PPP1R17	10842	Homo sapiens	Microarray	Functional MTI (Weak)	18185580
MIRT016790	hsa-miR-335-5p	Homo sapiens	NNT	23530	Homo sapiens	Microarray	Functional MTI (Weak)	18185580
MIRT016791	hsa-miR-335-5p	Homo sapiens	RASL10A	10633	Homo sapiens	Microarray	Functional MTI (Weak)	18185580
MIRT016792	hsa-miR-335-5p	Homo sapiens	CACNG1	786	Homo sapiens	Microarray	Functional MTI (Weak)	18185580
MIRT016793	hsa-miR-335-5p	Homo sapiens	CD24P4	938	Homo sapiens	Microarray	Functional MTI (Weak)	18185580
MIRT016794	hsa-miR-335-5p	Homo sapiens	ECE1	1889	Homo sapiens	Microarray	Functional MTI (Weak)	18185580
MIRT016795	hsa-miR-335-5p	Homo sapiens	SEC24D	9871	Homo sapiens	Microarray	Functional MTI (Weak)	18185580
MIRT016796	hsa-miR-335-5p	Homo sapiens	TMEM154	201799	Homo sapiens	Microarray	Functional MTI (Weak)	18185580
MIRT016797	hsa-miR-335-5p	Homo sapiens	CYTL1	54360	Homo sapiens	Microarray	Functional MTI (Weak)	18185580
MIRT016798	hsa-miR-335-5p	Homo sapiens	ACOT8	10005	Homo sapiens	Microarray	Functional MTI (Weak)	18185580
MIRT016799	hsa-miR-335-5p	Homo sapiens	ABCC11	85320	Homo sapiens	Microarray	Functional MTI (Weak)	18185580
MIRT016800	hsa-miR-335-5p	Homo sapiens	POU6F2	11281	Homo sapiens	Microarray	Functional MTI (Weak)	18185580
MIRT016801	hsa-miR-335-5p	Homo sapiens	SOBP	55084	Homo sapiens	Microarray	Functional MTI (Weak)	18185580
MIRT016802	hsa-miR-335-5p	Homo sapiens	HIST1H4I	8294	Homo sapiens	Microarray	Functional MTI (Weak)	18185580
MIRT016803	hsa-miR-335-5p	Homo sapiens	ARHGEF3	50650	Homo sapiens	Microarray	Functional MTI (Weak)	18185580
MIRT016804	hsa-miR-335-5p	Homo sapiens	ASIP	434	Homo sapiens	Microarray	Functional MTI (Weak)	18185580
MIRT016805	hsa-miR-335-5p	Homo sapiens	JAG2	3714	Homo sapiens	Microarray	Functional MTI (Weak)	18185580
MIRT016806	hsa-miR-335-5p	Homo sapiens	PRSS53	339105	Homo sapiens	Microarray	Functional MTI (Weak)	18185580
MIRT016807	hsa-miR-335-5p	Homo sapiens	SEMA3B	7869	Homo sapiens	Microarray	Functional MTI (Weak)	18185580
MIRT016808	hsa-miR-335-5p	Homo sapiens	ARRB1	408	Homo sapiens	Microarray	Functional MTI (Weak)	18185580
MIRT016809	hsa-miR-335-5p	Homo sapiens	PDE4A	5141	Homo sapiens	Microarray	Functional MTI (Weak)	18185580
MIRT016810	hsa-miR-335-5p	Homo sapiens	PPP3R2	5535	Homo sapiens	Microarray	Functional MTI (Weak)	18185580
MIRT016811	hsa-miR-335-5p	Homo sapiens	ARHGEF28	64283	Homo sapiens	Microarray	Functional MTI (Weak)	18185580
MIRT016812	hsa-miR-335-5p	Homo sapiens	NOL4	8715	Homo sapiens	Microarray	Functional MTI (Weak)	18185580
MIRT016813	hsa-miR-335-5p	Homo sapiens	SOX5	6660	Homo sapiens	Microarray	Functional MTI (Weak)	18185580
MIRT016814	hsa-miR-335-5p	Homo sapiens	SERPINA1	5265	Homo sapiens	Microarray	Functional MTI (Weak)	18185580
MIRT016815	hsa-miR-335-5p	Homo sapiens	EGLN1	54583	Homo sapiens	Microarray	Functional MTI (Weak)	18185580
MIRT016816	hsa-miR-335-5p	Homo sapiens	SH2D3A	10045	Homo sapiens	Microarray	Functional MTI (Weak)	18185580
MIRT016817	hsa-miR-335-5p	Homo sapiens	CD14	929	Homo sapiens	Microarray	Functional MTI (Weak)	18185580
MIRT016818	hsa-miR-335-5p	Homo sapiens	ESAM	90952	Homo sapiens	Microarray	Functional MTI (Weak)	18185580
MIRT016819	hsa-miR-335-5p	Homo sapiens	GALNT16	57452	Homo sapiens	Microarray	Functional MTI (Weak)	18185580
MIRT016820	hsa-miR-335-5p	Homo sapiens	PLEKHG1	57480	Homo sapiens	Microarray	Functional MTI (Weak)	18185580
MIRT016821	hsa-miR-335-5p	Homo sapiens	SCN1B	6324	Homo sapiens	Microarray	Functional MTI (Weak)	18185580
MIRT016822	hsa-miR-335-5p	Homo sapiens	FAM84B	157638	Homo sapiens	Microarray	Functional MTI (Weak)	18185580
MIRT016823	hsa-miR-335-5p	Homo sapiens	FBXL8	55336	Homo sapiens	Microarray	Functional MTI (Weak)	18185580
MIRT016824	hsa-miR-335-5p	Homo sapiens	ULK2	9706	Homo sapiens	Microarray	Functional MTI (Weak)	18185580
MIRT016825	hsa-miR-335-5p	Homo sapiens	CCNG2	901	Homo sapiens	Microarray	Functional MTI (Weak)	18185580
MIRT016826	hsa-miR-335-5p	Homo sapiens	ZNF654	55279	Homo sapiens	Microarray	Functional MTI (Weak)	18185580
MIRT016827	hsa-miR-335-5p	Homo sapiens	ABTB2	25841	Homo sapiens	Microarray	Functional MTI (Weak)	18185580
MIRT016828	hsa-miR-335-5p	Homo sapiens	LRP1B	53353	Homo sapiens	Microarray	Functional MTI (Weak)	18185580
MIRT016829	hsa-miR-335-5p	Homo sapiens	C7orf31	136895	Homo sapiens	Microarray	Functional MTI (Weak)	18185580
MIRT016830	hsa-miR-335-5p	Homo sapiens	POU2F3	25833	Homo sapiens	Microarray	Functional MTI (Weak)	18185580
MIRT016831	hsa-miR-335-5p	Homo sapiens	PARK2	5071	Homo sapiens	Microarray	Functional MTI (Weak)	18185580
MIRT016832	hsa-miR-335-5p	Homo sapiens	VAT1	10493	Homo sapiens	Microarray	Functional MTI (Weak)	18185580
MIRT016833	hsa-miR-335-5p	Homo sapiens	EDDM3B	64184	Homo sapiens	Microarray	Functional MTI (Weak)	18185580
MIRT016834	hsa-miR-335-5p	Homo sapiens	SLFN5	162394	Homo sapiens	Microarray	Functional MTI (Weak)	18185580
MIRT016835	hsa-miR-335-5p	Homo sapiens	TRAV22	28661	Homo sapiens	Microarray	Functional MTI (Weak)	18185580
MIRT016836	hsa-miR-335-5p	Homo sapiens	TSPYL2	64061	Homo sapiens	Microarray	Functional MTI (Weak)	18185580
MIRT016837	hsa-miR-335-5p	Homo sapiens	UBE4B	10277	Homo sapiens	Microarray	Functional MTI (Weak)	18185580
MIRT016838	hsa-miR-335-5p	Homo sapiens	NUCB1	4924	Homo sapiens	Microarray	Functional MTI (Weak)	18185580
MIRT016839	hsa-miR-335-5p	Homo sapiens	IL17RD	54756	Homo sapiens	Microarray	Functional MTI (Weak)	18185580
MIRT016840	hsa-miR-335-5p	Homo sapiens	FCRL4	83417	Homo sapiens	Microarray	Functional MTI (Weak)	18185580
MIRT016841	hsa-miR-335-5p	Homo sapiens	TBATA	219793	Homo sapiens	Microarray	Functional MTI (Weak)	18185580
MIRT016842	hsa-miR-335-5p	Homo sapiens	CASP14	23581	Homo sapiens	Microarray	Functional MTI (Weak)	18185580
MIRT016843	hsa-miR-335-5p	Homo sapiens	CHRNA7	1139	Homo sapiens	Microarray	Functional MTI (Weak)	18185580
MIRT016844	hsa-miR-335-5p	Homo sapiens	PNPLA3	80339	Homo sapiens	Microarray	Functional MTI (Weak)	18185580
MIRT016845	hsa-miR-335-5p	Homo sapiens	ODF3L1	161753	Homo sapiens	Microarray	Functional MTI (Weak)	18185580
MIRT016846	hsa-miR-335-5p	Homo sapiens	ADAM21	8747	Homo sapiens	Microarray	Functional MTI (Weak)	18185580
MIRT016847	hsa-miR-335-5p	Homo sapiens	PARD6B	84612	Homo sapiens	Microarray	Functional MTI (Weak)	18185580
MIRT016848	hsa-miR-335-5p	Homo sapiens	WNT7B	7477	Homo sapiens	Microarray	Functional MTI (Weak)	18185580
MIRT016849	hsa-miR-335-5p	Homo sapiens	LINC00313	114038	Homo sapiens	Microarray	Functional MTI (Weak)	18185580
MIRT016850	hsa-miR-335-5p	Homo sapiens	ATP10A	57194	Homo sapiens	Microarray	Functional MTI (Weak)	18185580
MIRT016851	hsa-miR-335-5p	Homo sapiens	DNMBP	23268	Homo sapiens	Microarray	Functional MTI (Weak)	18185580
MIRT016852	hsa-miR-335-5p	Homo sapiens	F10	2159	Homo sapiens	Microarray	Functional MTI (Weak)	18185580
MIRT016853	hsa-miR-335-5p	Homo sapiens	ENTPD4	9583	Homo sapiens	Microarray	Functional MTI (Weak)	18185580
MIRT016854	hsa-miR-335-5p	Homo sapiens	MEGF11	84465	Homo sapiens	Microarray	Functional MTI (Weak)	18185580
MIRT016855	hsa-miR-335-5p	Homo sapiens	ATP10D	57205	Homo sapiens	Microarray	Functional MTI (Weak)	18185580
MIRT016856	hsa-miR-335-5p	Homo sapiens	APOBEC4	403314	Homo sapiens	Microarray	Functional MTI (Weak)	18185580
MIRT016857	hsa-miR-335-5p	Homo sapiens	C20orf194	25943	Homo sapiens	Microarray	Functional MTI (Weak)	18185580
MIRT016858	hsa-miR-335-5p	Homo sapiens	TMEM130	222865	Homo sapiens	Microarray	Functional MTI (Weak)	18185580
MIRT016859	hsa-miR-335-5p	Homo sapiens	GDPD1	284161	Homo sapiens	Microarray	Functional MTI (Weak)	18185580
MIRT016860	hsa-miR-335-5p	Homo sapiens	KRT19	3880	Homo sapiens	Microarray	Functional MTI (Weak)	18185580
MIRT016861	hsa-miR-335-5p	Homo sapiens	PFKFB4	5210	Homo sapiens	Microarray	Functional MTI (Weak)	18185580
MIRT016862	hsa-miR-335-5p	Homo sapiens	HSPA1B	3304	Homo sapiens	Microarray	Functional MTI (Weak)	18185580
MIRT016863	hsa-miR-335-5p	Homo sapiens	CRISPLD2	83716	Homo sapiens	Microarray	Functional MTI (Weak)	18185580
MIRT016864	hsa-miR-335-5p	Homo sapiens	ROR2	4920	Homo sapiens	Microarray	Functional MTI (Weak)	18185580
MIRT016865	hsa-miR-335-5p	Homo sapiens	ZCCHC24	219654	Homo sapiens	Microarray	Functional MTI (Weak)	18185580
MIRT016866	hsa-miR-335-5p	Homo sapiens	SPP1	6696	Homo sapiens	Microarray	Functional MTI (Weak)	18185580
MIRT016867	hsa-miR-335-5p	Homo sapiens	RNF214	257160	Homo sapiens	Microarray	Functional MTI (Weak)	18185580
MIRT016868	hsa-miR-335-5p	Homo sapiens	CDRT4	284040	Homo sapiens	Microarray	Functional MTI (Weak)	18185580
MIRT016869	hsa-miR-335-5p	Homo sapiens	ZNF821	55565	Homo sapiens	Microarray	Functional MTI (Weak)	18185580
MIRT016870	hsa-miR-335-5p	Homo sapiens	FABP6	2172	Homo sapiens	Microarray	Functional MTI (Weak)	18185580
MIRT016871	hsa-miR-335-5p	Homo sapiens	SLC12A7	10723	Homo sapiens	Microarray	Functional MTI (Weak)	18185580
MIRT016872	hsa-miR-335-5p	Homo sapiens	CDR1	1038	Homo sapiens	Microarray	Functional MTI (Weak)	18185580
MIRT016873	hsa-miR-335-5p	Homo sapiens	MBD5	55777	Homo sapiens	Microarray	Functional MTI (Weak)	18185580
MIRT016874	hsa-miR-335-5p	Homo sapiens	HRH2	3274	Homo sapiens	Microarray	Functional MTI (Weak)	18185580
MIRT016875	hsa-miR-335-5p	Homo sapiens	RHOB	388	Homo sapiens	Microarray	Functional MTI (Weak)	18185580
MIRT016876	hsa-miR-335-5p	Homo sapiens	MAPK4	5596	Homo sapiens	Microarray	Functional MTI (Weak)	18185580
MIRT016877	hsa-miR-335-5p	Homo sapiens	ALDOC	230	Homo sapiens	Microarray	Functional MTI (Weak)	18185580
MIRT016878	hsa-miR-335-5p	Homo sapiens	SLC37A1	54020	Homo sapiens	Microarray	Functional MTI (Weak)	18185580
MIRT016879	hsa-miR-335-5p	Homo sapiens	ACOT4	122970	Homo sapiens	Microarray	Functional MTI (Weak)	18185580
MIRT016880	hsa-miR-335-5p	Homo sapiens	KLF4	9314	Homo sapiens	Microarray	Functional MTI (Weak)	18185580
MIRT016881	hsa-miR-335-5p	Homo sapiens	TIAF1	9220	Homo sapiens	Microarray	Functional MTI (Weak)	18185580
MIRT016882	hsa-miR-335-5p	Homo sapiens	SOX13	9580	Homo sapiens	Microarray	Functional MTI (Weak)	18185580
MIRT016883	hsa-miR-335-5p	Homo sapiens	SYNGR3	9143	Homo sapiens	Microarray	Functional MTI (Weak)	18185580
MIRT016884	hsa-miR-335-5p	Homo sapiens	JUP	3728	Homo sapiens	Microarray	Functional MTI (Weak)	18185580
MIRT016885	hsa-miR-335-5p	Homo sapiens	CFP	5199	Homo sapiens	Microarray	Functional MTI (Weak)	18185580
MIRT016886	hsa-miR-335-5p	Homo sapiens	OTUB2	78990	Homo sapiens	Microarray	Functional MTI (Weak)	18185580
MIRT016887	hsa-miR-335-5p	Homo sapiens	PER1	5187	Homo sapiens	Microarray	Functional MTI (Weak)	18185580
MIRT016888	hsa-miR-335-5p	Homo sapiens	GALNT12	79695	Homo sapiens	Microarray	Functional MTI (Weak)	18185580
MIRT016889	hsa-miR-335-5p	Homo sapiens	TMEM155	132332	Homo sapiens	Microarray	Functional MTI (Weak)	18185580
MIRT016890	hsa-miR-335-5p	Homo sapiens	JMY	133746	Homo sapiens	Microarray	Functional MTI (Weak)	18185580
MIRT016891	hsa-miR-335-5p	Homo sapiens	ERO1LB	56605	Homo sapiens	Microarray	Functional MTI (Weak)	18185580
MIRT016892	hsa-miR-335-5p	Homo sapiens	LYPD4	147719	Homo sapiens	Microarray	Functional MTI (Weak)	18185580
MIRT016893	hsa-miR-335-5p	Homo sapiens	SETX	23064	Homo sapiens	Microarray	Functional MTI (Weak)	18185580
MIRT016894	hsa-miR-335-5p	Homo sapiens	C20orf141	128653	Homo sapiens	Microarray	Functional MTI (Weak)	18185580
MIRT016895	hsa-miR-335-5p	Homo sapiens	GALNT5	11227	Homo sapiens	Microarray	Functional MTI (Weak)	18185580
MIRT016896	hsa-miR-335-5p	Homo sapiens	RAB3C	115827	Homo sapiens	Microarray	Functional MTI (Weak)	18185580
MIRT016897	hsa-miR-335-5p	Homo sapiens	GOLGA6L9	440295	Homo sapiens	Microarray	Functional MTI (Weak)	18185580
MIRT016898	hsa-miR-335-5p	Homo sapiens	BAZ2B	29994	Homo sapiens	Microarray	Functional MTI (Weak)	18185580
MIRT016899	hsa-miR-335-5p	Homo sapiens	SORBS2	8470	Homo sapiens	Microarray	Functional MTI (Weak)	18185580
MIRT016900	hsa-miR-335-5p	Homo sapiens	CYP21A2	1589	Homo sapiens	Microarray	Functional MTI (Weak)	18185580
MIRT016901	hsa-miR-335-5p	Homo sapiens	NEFM	4741	Homo sapiens	Microarray	Functional MTI (Weak)	18185580
MIRT016902	hsa-miR-335-5p	Homo sapiens	HYOU1	10525	Homo sapiens	Microarray	Functional MTI (Weak)	18185580
MIRT016903	hsa-miR-335-5p	Homo sapiens	GAGE12B	729428	Homo sapiens	Microarray	Functional MTI (Weak)	18185580
MIRT016904	hsa-miR-335-5p	Homo sapiens	LHX6	26468	Homo sapiens	Microarray	Functional MTI (Weak)	18185580
MIRT016905	hsa-miR-335-5p	Homo sapiens	CC2D2B	387707	Homo sapiens	Microarray	Functional MTI (Weak)	18185580
MIRT016906	hsa-miR-335-5p	Homo sapiens	PCDHGA8	9708	Homo sapiens	Microarray	Functional MTI (Weak)	18185580
MIRT016907	hsa-miR-335-5p	Homo sapiens	SERINC2	347735	Homo sapiens	Microarray	Functional MTI (Weak)	18185580
MIRT016908	hsa-miR-335-5p	Homo sapiens	EPHA4	2043	Homo sapiens	Microarray	Functional MTI (Weak)	18185580
MIRT016909	hsa-miR-335-5p	Homo sapiens	C11orf52	91894	Homo sapiens	Microarray	Functional MTI (Weak)	18185580
MIRT016910	hsa-miR-335-5p	Homo sapiens	RRBP1	6238	Homo sapiens	Microarray	Functional MTI (Weak)	18185580
MIRT016911	hsa-miR-335-5p	Homo sapiens	VEGFA	7422	Homo sapiens	Microarray	Functional MTI (Weak)	18185580
MIRT016912	hsa-miR-335-5p	Homo sapiens	SCRG1	11341	Homo sapiens	Microarray	Functional MTI (Weak)	18185580
MIRT016913	hsa-miR-335-5p	Homo sapiens	TUBGCP6	85378	Homo sapiens	Microarray	Functional MTI (Weak)	18185580
MIRT016914	hsa-miR-335-5p	Homo sapiens	CDH20	28316	Homo sapiens	Microarray	Functional MTI (Weak)	18185580
MIRT016915	hsa-miR-335-5p	Homo sapiens	RAB4B	53916	Homo sapiens	Microarray	Functional MTI (Weak)	18185580
MIRT016916	hsa-miR-335-5p	Homo sapiens	SYT14	255928	Homo sapiens	Microarray	Functional MTI (Weak)	18185580
MIRT016917	hsa-miR-335-5p	Homo sapiens	HTR7	3363	Homo sapiens	Microarray	Functional MTI (Weak)	18185580
MIRT016918	hsa-miR-335-5p	Homo sapiens	APBB2	323	Homo sapiens	Microarray	Functional MTI (Weak)	18185580
MIRT016919	hsa-miR-335-5p	Homo sapiens	IL25	64806	Homo sapiens	Microarray	Functional MTI (Weak)	18185580
MIRT016920	hsa-miR-335-5p	Homo sapiens	DUSP16	80824	Homo sapiens	Microarray	Functional MTI (Weak)	18185580
MIRT016921	hsa-miR-335-5p	Homo sapiens	DNAAF2	55172	Homo sapiens	Microarray	Functional MTI (Weak)	18185580
MIRT016922	hsa-miR-335-5p	Homo sapiens	PRAMEF17	391004	Homo sapiens	Microarray	Functional MTI (Weak)	18185580
MIRT016923	hsa-miR-335-5p	Homo sapiens	DNASE2B	58511	Homo sapiens	Microarray	Functional MTI (Weak)	18185580
MIRT016924	hsa-miR-335-5p	Homo sapiens	SNED1	25992	Homo sapiens	Microarray	Functional MTI (Weak)	18185580
MIRT016925	hsa-miR-335-5p	Homo sapiens	TUSC5	286753	Homo sapiens	Microarray	Functional MTI (Weak)	18185580
MIRT016926	hsa-miR-335-5p	Homo sapiens	MEIS3	56917	Homo sapiens	Microarray	Functional MTI (Weak)	18185580
MIRT016927	hsa-miR-335-5p	Homo sapiens	DDIT3	1649	Homo sapiens	Microarray	Functional MTI (Weak)	18185580
MIRT016928	hsa-miR-335-5p	Homo sapiens	CD8A	925	Homo sapiens	Microarray	Functional MTI (Weak)	18185580
MIRT016929	hsa-miR-335-5p	Homo sapiens	CHD6	84181	Homo sapiens	Microarray	Functional MTI (Weak)	18185580
MIRT016930	hsa-miR-335-5p	Homo sapiens	ZNF771	51333	Homo sapiens	Microarray	Functional MTI (Weak)	18185580
MIRT016931	hsa-miR-335-5p	Homo sapiens	LATS1	9113	Homo sapiens	Microarray	Functional MTI (Weak)	18185580
MIRT016932	hsa-miR-335-5p	Homo sapiens	FN3K	64122	Homo sapiens	Microarray	Functional MTI (Weak)	18185580
MIRT016933	hsa-miR-335-5p	Homo sapiens	FOXO1	2308	Homo sapiens	Microarray	Functional MTI (Weak)	18185580
MIRT016934	hsa-miR-335-5p	Homo sapiens	FAM160A2	84067	Homo sapiens	Microarray	Functional MTI (Weak)	18185580
MIRT016935	hsa-miR-335-5p	Homo sapiens	SALL4	57167	Homo sapiens	Microarray	Functional MTI (Weak)	18185580
MIRT016936	hsa-miR-335-5p	Homo sapiens	CAPN11	11131	Homo sapiens	Microarray	Functional MTI (Weak)	18185580
MIRT016937	hsa-miR-335-5p	Homo sapiens	BRAT1	221927	Homo sapiens	Microarray	Functional MTI (Weak)	18185580
MIRT016938	hsa-miR-335-5p	Homo sapiens	LTC4S	4056	Homo sapiens	Microarray	Functional MTI (Weak)	18185580
MIRT016939	hsa-miR-335-5p	Homo sapiens	DAAM1	23002	Homo sapiens	Microarray	Functional MTI (Weak)	18185580
MIRT016940	hsa-miR-335-5p	Homo sapiens	LPAL2	80350	Homo sapiens	Microarray	Functional MTI (Weak)	18185580
MIRT016941	hsa-miR-335-5p	Homo sapiens	FGF16	8823	Homo sapiens	Microarray	Functional MTI (Weak)	18185580
MIRT016942	hsa-miR-335-5p	Homo sapiens	KCNC1	3746	Homo sapiens	Microarray	Functional MTI (Weak)	18185580
MIRT016943	hsa-miR-335-5p	Homo sapiens	RNF213	57674	Homo sapiens	Microarray	Functional MTI (Weak)	18185580
MIRT016944	hsa-miR-335-5p	Homo sapiens	CXCL9	4283	Homo sapiens	Microarray	Functional MTI (Weak)	18185580
MIRT016945	hsa-miR-335-5p	Homo sapiens	TMPRSS13	84000	Homo sapiens	Microarray	Functional MTI (Weak)	18185580
MIRT016946	hsa-miR-335-5p	Homo sapiens	ABCA3	21	Homo sapiens	Microarray	Functional MTI (Weak)	18185580
MIRT016947	hsa-miR-335-5p	Homo sapiens	BBX	56987	Homo sapiens	Microarray	Functional MTI (Weak)	18185580
MIRT016948	hsa-miR-335-5p	Homo sapiens	OR8G7P	282786	Homo sapiens	Microarray	Functional MTI (Weak)	18185580
MIRT016949	hsa-miR-335-5p	Homo sapiens	IL6	3569	Homo sapiens	Microarray	Functional MTI (Weak)	18185580
MIRT016950	hsa-miR-335-5p	Homo sapiens	TRIB1	10221	Homo sapiens	Microarray	Functional MTI (Weak)	18185580
MIRT016951	hsa-miR-335-5p	Homo sapiens	VIP	7432	Homo sapiens	Microarray	Functional MTI (Weak)	18185580
MIRT016952	hsa-miR-335-5p	Homo sapiens	PIGN	23556	Homo sapiens	Microarray	Functional MTI (Weak)	18185580
MIRT016953	hsa-miR-335-5p	Homo sapiens	CPNE5	57699	Homo sapiens	Microarray	Functional MTI (Weak)	18185580
MIRT016954	hsa-miR-335-5p	Homo sapiens	FPGT-TNNI3K	100526835	Homo sapiens	Microarray	Functional MTI (Weak)	18185580
MIRT016955	hsa-miR-335-5p	Homo sapiens	PNRC1	10957	Homo sapiens	Microarray	Functional MTI (Weak)	18185580
MIRT016956	hsa-miR-335-5p	Homo sapiens	C12orf56	115749	Homo sapiens	Microarray	Functional MTI (Weak)	18185580
MIRT016957	hsa-miR-335-5p	Homo sapiens	CABP1	9478	Homo sapiens	Microarray	Functional MTI (Weak)	18185580
MIRT016958	hsa-miR-335-5p	Homo sapiens	KIF17	57576	Homo sapiens	Microarray	Functional MTI (Weak)	18185580
MIRT016959	hsa-miR-335-5p	Homo sapiens	ZFP57	346171	Homo sapiens	Microarray	Functional MTI (Weak)	18185580
MIRT016960	hsa-miR-335-5p	Homo sapiens	DAPK2	23604	Homo sapiens	Microarray	Functional MTI (Weak)	18185580
MIRT016961	hsa-miR-335-5p	Homo sapiens	HSPA1L	3305	Homo sapiens	Microarray	Functional MTI (Weak)	18185580
MIRT016962	hsa-miR-335-5p	Homo sapiens	IL37	27178	Homo sapiens	Microarray	Functional MTI (Weak)	18185580
MIRT016963	hsa-miR-335-5p	Homo sapiens	LINC00324	284029	Homo sapiens	Microarray	Functional MTI (Weak)	18185580
MIRT016964	hsa-miR-335-5p	Homo sapiens	YPEL5	51646	Homo sapiens	Microarray	Functional MTI (Weak)	18185580
MIRT016965	hsa-miR-335-5p	Homo sapiens	LRRC41	10489	Homo sapiens	Microarray	Functional MTI (Weak)	18185580
MIRT016966	hsa-miR-335-5p	Homo sapiens	C21orf62	56245	Homo sapiens	Microarray	Functional MTI (Weak)	18185580
MIRT016967	hsa-miR-335-5p	Homo sapiens	ITPR2	3709	Homo sapiens	Microarray	Functional MTI (Weak)	18185580
MIRT016968	hsa-miR-335-5p	Homo sapiens	NECAB1	64168	Homo sapiens	Microarray	Functional MTI (Weak)	18185580
MIRT016969	hsa-miR-335-5p	Homo sapiens	DYRK1B	9149	Homo sapiens	Microarray	Functional MTI (Weak)	18185580
MIRT016970	hsa-miR-335-5p	Homo sapiens	MMP14	4323	Homo sapiens	Microarray	Functional MTI (Weak)	18185580
MIRT016971	hsa-miR-335-5p	Homo sapiens	ACSM1	116285	Homo sapiens	Microarray	Functional MTI (Weak)	18185580
MIRT016972	hsa-miR-335-5p	Homo sapiens	ITGB2	3689	Homo sapiens	Microarray	Functional MTI (Weak)	18185580
MIRT016973	hsa-miR-335-5p	Homo sapiens	SIGLEC5	8778	Homo sapiens	Microarray	Functional MTI (Weak)	18185580
MIRT016974	hsa-miR-335-5p	Homo sapiens	PSORS1C1	170679	Homo sapiens	Microarray	Functional MTI (Weak)	18185580
MIRT016975	hsa-miR-335-5p	Homo sapiens	MAFB	9935	Homo sapiens	Microarray	Functional MTI (Weak)	18185580
MIRT016976	hsa-miR-335-5p	Homo sapiens	GREB1	9687	Homo sapiens	Microarray	Functional MTI (Weak)	18185580
MIRT016977	hsa-miR-335-5p	Homo sapiens	GLS2	27165	Homo sapiens	Microarray	Functional MTI (Weak)	18185580
MIRT016978	hsa-miR-335-5p	Homo sapiens	KDR	3791	Homo sapiens	Microarray	Functional MTI (Weak)	18185580
MIRT016979	hsa-miR-335-5p	Homo sapiens	CSF1	1435	Homo sapiens	Microarray	Functional MTI (Weak)	18185580
MIRT016980	hsa-miR-335-5p	Homo sapiens	HECTD4	283450	Homo sapiens	Microarray	Functional MTI (Weak)	18185580
MIRT016981	hsa-miR-335-5p	Homo sapiens	TET2	54790	Homo sapiens	Microarray	Functional MTI (Weak)	18185580
MIRT016982	hsa-miR-335-5p	Homo sapiens	DHCR7	1717	Homo sapiens	Microarray	Functional MTI (Weak)	18185580
MIRT016983	hsa-miR-335-5p	Homo sapiens	PCDHB10	56126	Homo sapiens	Microarray	Functional MTI (Weak)	18185580
MIRT016984	hsa-miR-335-5p	Homo sapiens	GFAP	2670	Homo sapiens	Microarray	Functional MTI (Weak)	18185580
MIRT016985	hsa-miR-335-5p	Homo sapiens	OR8D2	283160	Homo sapiens	Microarray	Functional MTI (Weak)	18185580
MIRT016986	hsa-miR-335-5p	Homo sapiens	ESRP1	54845	Homo sapiens	Microarray	Functional MTI (Weak)	18185580
MIRT016987	hsa-miR-335-5p	Homo sapiens	ARHGEF4	50649	Homo sapiens	Microarray	Functional MTI (Weak)	18185580
MIRT016988	hsa-miR-335-5p	Homo sapiens	SLC25A41	284427	Homo sapiens	Microarray	Functional MTI (Weak)	18185580
MIRT016989	hsa-miR-335-5p	Homo sapiens	ZKSCAN2	342357	Homo sapiens	Microarray	Functional MTI (Weak)	18185580
MIRT016990	hsa-miR-335-5p	Homo sapiens	KMT2C	58508	Homo sapiens	Microarray	Functional MTI (Weak)	18185580
MIRT016991	hsa-miR-335-5p	Homo sapiens	ANGPT4	51378	Homo sapiens	Microarray	Functional MTI (Weak)	18185580
MIRT016992	hsa-miR-335-5p	Homo sapiens	GABRP	2568	Homo sapiens	Microarray	Functional MTI (Weak)	18185580
MIRT016993	hsa-miR-335-5p	Homo sapiens	GRB7	2886	Homo sapiens	Microarray	Functional MTI (Weak)	18185580
MIRT016994	hsa-miR-335-5p	Homo sapiens	PHYHIP	9796	Homo sapiens	Microarray	Functional MTI (Weak)	18185580
MIRT016995	hsa-miR-335-5p	Homo sapiens	MGAT4A	11320	Homo sapiens	Microarray	Functional MTI (Weak)	18185580
MIRT016996	hsa-miR-335-5p	Homo sapiens	PHF21A	51317	Homo sapiens	Microarray	Functional MTI (Weak)	18185580
MIRT016997	hsa-miR-335-5p	Homo sapiens	OSMR	9180	Homo sapiens	Microarray	Functional MTI (Weak)	18185580
MIRT016998	hsa-miR-335-5p	Homo sapiens	GULP1	51454	Homo sapiens	Microarray	Functional MTI (Weak)	18185580
MIRT016999	hsa-miR-335-5p	Homo sapiens	PCYOX1	51449	Homo sapiens	Microarray	Functional MTI (Weak)	18185580
MIRT017000	hsa-miR-335-5p	Homo sapiens	GPR50	9248	Homo sapiens	Microarray	Functional MTI (Weak)	18185580
MIRT017001	hsa-miR-335-5p	Homo sapiens	SASH1	23328	Homo sapiens	Microarray	Functional MTI (Weak)	18185580
MIRT017002	hsa-miR-335-5p	Homo sapiens	MANBA	4126	Homo sapiens	Microarray	Functional MTI (Weak)	18185580
MIRT017003	hsa-miR-335-5p	Homo sapiens	HIST1H4L	8368	Homo sapiens	Microarray	Functional MTI (Weak)	18185580
MIRT017004	hsa-miR-335-5p	Homo sapiens	BFSP2	8419	Homo sapiens	Microarray	Functional MTI (Weak)	18185580
MIRT017005	hsa-miR-335-5p	Homo sapiens	SOX1	6656	Homo sapiens	Microarray	Functional MTI (Weak)	18185580
MIRT017006	hsa-miR-335-5p	Homo sapiens	RASGEF1A	221002	Homo sapiens	Microarray	Functional MTI (Weak)	18185580
MIRT017007	hsa-miR-335-5p	Homo sapiens	CLIC3	9022	Homo sapiens	Microarray	Functional MTI (Weak)	18185580
MIRT017008	hsa-miR-335-5p	Homo sapiens	GBX2	2637	Homo sapiens	Microarray	Functional MTI (Weak)	18185580
MIRT017009	hsa-miR-335-5p	Homo sapiens	LEPR	3953	Homo sapiens	Microarray	Functional MTI (Weak)	18185580
MIRT017010	hsa-miR-335-5p	Homo sapiens	GRIK1-AS1	642976	Homo sapiens	Microarray	Functional MTI (Weak)	18185580
MIRT017011	hsa-miR-335-5p	Homo sapiens	TNFSF9	8744	Homo sapiens	Microarray	Functional MTI (Weak)	18185580
MIRT017012	hsa-miR-335-5p	Homo sapiens	TRAV23DV6	28660	Homo sapiens	Microarray	Functional MTI (Weak)	18185580
MIRT017013	hsa-miR-335-5p	Homo sapiens	FGF23	8074	Homo sapiens	Microarray	Functional MTI (Weak)	18185580
MIRT017014	hsa-miR-335-5p	Homo sapiens	CXorf58	254158	Homo sapiens	Microarray	Functional MTI (Weak)	18185580
MIRT017015	hsa-miR-335-5p	Homo sapiens	MKNK2	2872	Homo sapiens	Microarray	Functional MTI (Weak)	18185580
MIRT017016	hsa-miR-335-5p	Homo sapiens	STAT6	6778	Homo sapiens	Microarray	Functional MTI (Weak)	18185580
MIRT017017	hsa-miR-335-5p	Homo sapiens	SIGIRR	59307	Homo sapiens	Microarray	Functional MTI (Weak)	18185580
MIRT017018	hsa-miR-335-5p	Homo sapiens	MFGE8	4240	Homo sapiens	Microarray	Functional MTI (Weak)	18185580
MIRT017019	hsa-miR-335-5p	Homo sapiens	SERPINB10	5273	Homo sapiens	Microarray	Functional MTI (Weak)	18185580
MIRT017020	hsa-miR-335-5p	Homo sapiens	ST14	6768	Homo sapiens	Microarray	Functional MTI (Weak)	18185580
MIRT017021	hsa-miR-335-5p	Homo sapiens	KIF27	55582	Homo sapiens	Microarray	Functional MTI (Weak)	18185580
MIRT017022	hsa-miR-335-5p	Homo sapiens	TRRAP	8295	Homo sapiens	Microarray	Functional MTI (Weak)	18185580
MIRT017023	hsa-miR-335-5p	Homo sapiens	TEKT3	64518	Homo sapiens	Microarray	Functional MTI (Weak)	18185580
MIRT017024	hsa-miR-335-5p	Homo sapiens	ZNF461	92283	Homo sapiens	Microarray	Functional MTI (Weak)	18185580
MIRT017025	hsa-miR-335-5p	Homo sapiens	SDCCAG8	10806	Homo sapiens	Microarray	Functional MTI (Weak)	18185580
MIRT017026	hsa-miR-335-5p	Homo sapiens	PCDHGC5	56097	Homo sapiens	Microarray	Functional MTI (Weak)	18185580
MIRT017027	hsa-miR-335-5p	Homo sapiens	FAM71F2	346653	Homo sapiens	Microarray	Functional MTI (Weak)	18185580
MIRT017028	hsa-miR-335-5p	Homo sapiens	ARX	170302	Homo sapiens	Microarray	Functional MTI (Weak)	18185580
MIRT017029	hsa-miR-335-5p	Homo sapiens	AGPAT3	56894	Homo sapiens	Microarray	Functional MTI (Weak)	18185580
MIRT017030	hsa-miR-335-5p	Homo sapiens	KLHL24	54800	Homo sapiens	Microarray	Functional MTI (Weak)	18185580
MIRT017031	hsa-miR-335-5p	Homo sapiens	DYRK1A	1859	Homo sapiens	Microarray	Functional MTI (Weak)	18185580
MIRT017032	hsa-miR-335-5p	Homo sapiens	CTDP1	9150	Homo sapiens	Microarray	Functional MTI (Weak)	18185580
MIRT017033	hsa-miR-335-5p	Homo sapiens	FTSJD2	23070	Homo sapiens	Microarray	Functional MTI (Weak)	18185580
MIRT017034	hsa-miR-335-5p	Homo sapiens	MLC1	23209	Homo sapiens	Microarray	Functional MTI (Weak)	18185580
MIRT017035	hsa-miR-335-5p	Homo sapiens	CYP19A1	1588	Homo sapiens	Microarray	Functional MTI (Weak)	18185580
MIRT017036	hsa-miR-335-5p	Homo sapiens	MAN1A1	4121	Homo sapiens	Microarray	Functional MTI (Weak)	18185580
MIRT017037	hsa-miR-335-5p	Homo sapiens	TBX15	6913	Homo sapiens	Microarray	Functional MTI (Weak)	18185580
MIRT017038	hsa-miR-335-5p	Homo sapiens	PELP1	27043	Homo sapiens	Microarray	Functional MTI (Weak)	18185580
MIRT017039	hsa-miR-335-5p	Homo sapiens	SUSD3	203328	Homo sapiens	Microarray	Functional MTI (Weak)	18185580
MIRT017040	hsa-miR-335-5p	Homo sapiens	RSPO3	84870	Homo sapiens	Microarray	Functional MTI (Weak)	18185580
MIRT017041	hsa-miR-335-5p	Homo sapiens	NIPSNAP1	8508	Homo sapiens	Microarray	Functional MTI (Weak)	18185580
MIRT017042	hsa-miR-335-5p	Homo sapiens	RARRES2	5919	Homo sapiens	Microarray	Functional MTI (Weak)	18185580
MIRT017043	hsa-miR-335-5p	Homo sapiens	PTAFR	5724	Homo sapiens	Microarray	Functional MTI (Weak)	18185580
MIRT017044	hsa-miR-335-5p	Homo sapiens	THBD	7056	Homo sapiens	Microarray	Functional MTI (Weak)	18185580
MIRT017045	hsa-miR-335-5p	Homo sapiens	SLC30A2	7780	Homo sapiens	Microarray	Functional MTI (Weak)	18185580
MIRT017046	hsa-miR-335-5p	Homo sapiens	HOXA2	3199	Homo sapiens	Microarray	Functional MTI (Weak)	18185580
MIRT017047	hsa-miR-335-5p	Homo sapiens	LINC00487	400941	Homo sapiens	Microarray	Functional MTI (Weak)	18185580
MIRT017048	hsa-miR-335-5p	Homo sapiens	TNFRSF9	3604	Homo sapiens	Microarray	Functional MTI (Weak)	18185580
MIRT017049	hsa-miR-335-5p	Homo sapiens	HEY1	23462	Homo sapiens	Microarray	Functional MTI (Weak)	18185580
MIRT017050	hsa-miR-335-5p	Homo sapiens	KIRREL	55243	Homo sapiens	Microarray	Functional MTI (Weak)	18185580
MIRT017051	hsa-miR-335-5p	Homo sapiens	IL1A	3552	Homo sapiens	Microarray	Functional MTI (Weak)	18185580
MIRT017052	hsa-miR-335-5p	Homo sapiens	DEFB104A	140596	Homo sapiens	Microarray	Functional MTI (Weak)	18185580
MIRT017053	hsa-miR-335-5p	Homo sapiens	IGDCC4	57722	Homo sapiens	Microarray	Functional MTI (Weak)	18185580
MIRT017054	hsa-miR-335-5p	Homo sapiens	SH3D21	79729	Homo sapiens	Microarray	Functional MTI (Weak)	18185580
MIRT017055	hsa-miR-335-5p	Homo sapiens	PDZD8	118987	Homo sapiens	Microarray	Functional MTI (Weak)	18185580
MIRT017056	hsa-miR-335-5p	Homo sapiens	C8G	733	Homo sapiens	Microarray	Functional MTI (Weak)	18185580
MIRT017057	hsa-miR-335-5p	Homo sapiens	TACSTD2	4070	Homo sapiens	Microarray	Functional MTI (Weak)	18185580
MIRT017058	hsa-miR-335-5p	Homo sapiens	ASB11	140456	Homo sapiens	Microarray	Functional MTI (Weak)	18185580
MIRT017059	hsa-miR-335-5p	Homo sapiens	SCIMP	388325	Homo sapiens	Microarray	Functional MTI (Weak)	18185580
MIRT017060	hsa-miR-335-5p	Homo sapiens	MUC15	143662	Homo sapiens	Microarray	Functional MTI (Weak)	18185580
MIRT017061	hsa-miR-335-5p	Homo sapiens	SHH	6469	Homo sapiens	Microarray	Functional MTI (Weak)	18185580
MIRT017062	hsa-miR-335-5p	Homo sapiens	PTH2	113091	Homo sapiens	Microarray	Functional MTI (Weak)	18185580
MIRT017063	hsa-miR-335-5p	Homo sapiens	SLC2A12	154091	Homo sapiens	Microarray	Functional MTI (Weak)	18185580
MIRT017064	hsa-miR-335-5p	Homo sapiens	EXD3	54932	Homo sapiens	Microarray	Functional MTI (Weak)	18185580
MIRT017065	hsa-miR-335-5p	Homo sapiens	OPN1MW2	728458	Homo sapiens	Microarray	Functional MTI (Weak)	18185580
MIRT017066	hsa-miR-335-5p	Homo sapiens	IGLV1-47	28822	Homo sapiens	Microarray	Functional MTI (Weak)	18185580
MIRT017067	hsa-miR-335-5p	Homo sapiens	ZNF518A	9849	Homo sapiens	Microarray	Functional MTI (Weak)	18185580
MIRT017068	hsa-miR-335-5p	Homo sapiens	HSPB3	8988	Homo sapiens	Microarray	Functional MTI (Weak)	18185580
MIRT017069	hsa-miR-335-5p	Homo sapiens	KMT2E	55904	Homo sapiens	Microarray	Functional MTI (Weak)	18185580
MIRT017070	hsa-miR-335-5p	Homo sapiens	IRX2	153572	Homo sapiens	Microarray	Functional MTI (Weak)	18185580
MIRT017071	hsa-miR-335-5p	Homo sapiens	LRRK2	120892	Homo sapiens	Microarray	Functional MTI (Weak)	18185580
MIRT017072	hsa-miR-335-5p	Homo sapiens	HOXA11	3207	Homo sapiens	Microarray	Functional MTI (Weak)	18185580
MIRT017073	hsa-miR-335-5p	Homo sapiens	RAB11FIP1	80223	Homo sapiens	Microarray	Functional MTI (Weak)	18185580
MIRT017074	hsa-miR-335-5p	Homo sapiens	MAML2	84441	Homo sapiens	Microarray	Functional MTI (Weak)	18185580
MIRT017075	hsa-miR-335-5p	Homo sapiens	NPAS1	4861	Homo sapiens	Microarray	Functional MTI (Weak)	18185580
MIRT017076	hsa-miR-335-5p	Homo sapiens	XRRA1	143570	Homo sapiens	Microarray	Functional MTI (Weak)	18185580
MIRT017077	hsa-miR-335-5p	Homo sapiens	CLCN2	1181	Homo sapiens	Microarray	Functional MTI (Weak)	18185580
MIRT017078	hsa-miR-335-5p	Homo sapiens	FNDC9	408263	Homo sapiens	Microarray	Functional MTI (Weak)	18185580
MIRT017079	hsa-miR-335-5p	Homo sapiens	TANC2	26115	Homo sapiens	Microarray	Functional MTI (Weak)	18185580
MIRT017080	hsa-miR-335-5p	Homo sapiens	PTPRT	11122	Homo sapiens	Microarray	Functional MTI (Weak)	18185580
MIRT017081	hsa-miR-335-5p	Homo sapiens	ULK1	8408	Homo sapiens	Microarray	Functional MTI (Weak)	18185580
MIRT017082	hsa-miR-335-5p	Homo sapiens	ACACA	31	Homo sapiens	Microarray	Functional MTI (Weak)	18185580
MIRT017083	hsa-miR-335-5p	Homo sapiens	DUSP5	1847	Homo sapiens	Microarray	Functional MTI (Weak)	18185580
MIRT017084	hsa-miR-335-5p	Homo sapiens	G2E3	55632	Homo sapiens	Microarray	Functional MTI (Weak)	18185580
MIRT017085	hsa-miR-335-5p	Homo sapiens	ZFP69	339559	Homo sapiens	Microarray	Functional MTI (Weak)	18185580
MIRT017086	hsa-miR-335-5p	Homo sapiens	SPRR3	6707	Homo sapiens	Microarray	Functional MTI (Weak)	18185580
MIRT017087	hsa-miR-335-5p	Homo sapiens	TOX2	84969	Homo sapiens	Microarray	Functional MTI (Weak)	18185580
MIRT017088	hsa-miR-335-5p	Homo sapiens	GRIK4	2900	Homo sapiens	Microarray	Functional MTI (Weak)	18185580
MIRT017089	hsa-miR-335-5p	Homo sapiens	FGD2	221472	Homo sapiens	Microarray	Functional MTI (Weak)	18185580
MIRT017090	hsa-miR-335-5p	Homo sapiens	SH2D6	284948	Homo sapiens	Microarray	Functional MTI (Weak)	18185580
MIRT017091	hsa-miR-335-5p	Homo sapiens	LTBP1	4052	Homo sapiens	Microarray	Functional MTI (Weak)	18185580
MIRT017092	hsa-miR-335-5p	Homo sapiens	NEUROD4	58158	Homo sapiens	Microarray	Functional MTI (Weak)	18185580
MIRT017093	hsa-miR-335-5p	Homo sapiens	RNF121	55298	Homo sapiens	Microarray	Functional MTI (Weak)	18185580
MIRT017094	hsa-miR-335-5p	Homo sapiens	IL22	50616	Homo sapiens	Microarray	Functional MTI (Weak)	18185580
MIRT017095	hsa-miR-335-5p	Homo sapiens	C4orf45	152940	Homo sapiens	Microarray	Functional MTI (Weak)	18185580
MIRT017096	hsa-miR-335-5p	Homo sapiens	MAMLD1	10046	Homo sapiens	Microarray	Functional MTI (Weak)	18185580
MIRT017097	hsa-miR-335-5p	Homo sapiens	PLAC8L1	153770	Homo sapiens	Microarray	Functional MTI (Weak)	18185580
MIRT017098	hsa-miR-335-5p	Homo sapiens	TEAD2	8463	Homo sapiens	Microarray	Functional MTI (Weak)	18185580
MIRT017099	hsa-miR-335-5p	Homo sapiens	PLD3	23646	Homo sapiens	Microarray	Functional MTI (Weak)	18185580
MIRT017100	hsa-miR-335-5p	Homo sapiens	TAZ	6901	Homo sapiens	Microarray	Functional MTI (Weak)	18185580
MIRT017101	hsa-miR-335-5p	Homo sapiens	MYPN	84665	Homo sapiens	Microarray	Functional MTI (Weak)	18185580
MIRT017102	hsa-miR-335-5p	Homo sapiens	MAP3K8	1326	Homo sapiens	Microarray	Functional MTI (Weak)	18185580
MIRT017103	hsa-miR-335-5p	Homo sapiens	CNGB1	1258	Homo sapiens	Microarray	Functional MTI (Weak)	18185580
MIRT017104	hsa-miR-335-5p	Homo sapiens	ABCA12	26154	Homo sapiens	Microarray	Functional MTI (Weak)	18185580
MIRT017105	hsa-miR-335-5p	Homo sapiens	DISP1	84976	Homo sapiens	Microarray	Functional MTI (Weak)	18185580
MIRT017106	hsa-miR-335-5p	Homo sapiens	ELOVL6	79071	Homo sapiens	Microarray	Functional MTI (Weak)	18185580
MIRT017107	hsa-miR-335-5p	Homo sapiens	FAM151A	338094	Homo sapiens	Microarray	Functional MTI (Weak)	18185580
MIRT017108	hsa-miR-335-5p	Homo sapiens	ZNF579	163033	Homo sapiens	Microarray	Functional MTI (Weak)	18185580
MIRT017109	hsa-miR-335-5p	Homo sapiens	DHH	50846	Homo sapiens	Microarray	Functional MTI (Weak)	18185580
MIRT017110	hsa-miR-335-5p	Homo sapiens	FAM131C	348487	Homo sapiens	Microarray	Functional MTI (Weak)	18185580
MIRT017111	hsa-miR-335-5p	Homo sapiens	RSPH4A	345895	Homo sapiens	Microarray	Functional MTI (Weak)	18185580
MIRT017112	hsa-miR-335-5p	Homo sapiens	SLC6A12	6539	Homo sapiens	Microarray	Functional MTI (Weak)	18185580
MIRT017113	hsa-miR-335-5p	Homo sapiens	XKR6	286046	Homo sapiens	Microarray	Functional MTI (Weak)	18185580
MIRT017114	hsa-miR-335-5p	Homo sapiens	FLG2	388698	Homo sapiens	Microarray	Functional MTI (Weak)	18185580
MIRT017115	hsa-miR-335-5p	Homo sapiens	MLXIP	22877	Homo sapiens	Microarray	Functional MTI (Weak)	18185580
MIRT017116	hsa-miR-335-5p	Homo sapiens	NEIL1	79661	Homo sapiens	Microarray	Functional MTI (Weak)	18185580
MIRT017117	hsa-miR-335-5p	Homo sapiens	ING4	51147	Homo sapiens	Microarray	Functional MTI (Weak)	18185580
MIRT017118	hsa-miR-335-5p	Homo sapiens	SMG7	9887	Homo sapiens	Microarray	Functional MTI (Weak)	18185580
MIRT017119	hsa-miR-335-5p	Homo sapiens	FREM1	158326	Homo sapiens	Microarray	Functional MTI (Weak)	18185580
MIRT017120	hsa-miR-335-5p	Homo sapiens	FOXA2	3170	Homo sapiens	Microarray	Functional MTI (Weak)	18185580
MIRT017121	hsa-miR-335-5p	Homo sapiens	ATG16L2	89849	Homo sapiens	Microarray	Functional MTI (Weak)	18185580
MIRT017122	hsa-miR-335-5p	Homo sapiens	LDLR	3949	Homo sapiens	Microarray	Functional MTI (Weak)	18185580
MIRT017123	hsa-miR-335-5p	Homo sapiens	COPA	1314	Homo sapiens	Microarray	Functional MTI (Weak)	18185580
MIRT017124	hsa-miR-335-5p	Homo sapiens	SESN3	143686	Homo sapiens	Microarray	Functional MTI (Weak)	18185580
MIRT017125	hsa-miR-335-5p	Homo sapiens	SLC29A3	55315	Homo sapiens	Microarray	Functional MTI (Weak)	18185580
MIRT017126	hsa-miR-335-5p	Homo sapiens	TMEM25	84866	Homo sapiens	Microarray	Functional MTI (Weak)	18185580
MIRT017127	hsa-miR-335-5p	Homo sapiens	C6orf223	221416	Homo sapiens	Microarray	Functional MTI (Weak)	18185580
MIRT017128	hsa-miR-335-5p	Homo sapiens	GLTPD2	388323	Homo sapiens	Microarray	Functional MTI (Weak)	18185580
MIRT017129	hsa-miR-335-5p	Homo sapiens	PLK3	1263	Homo sapiens	Microarray	Functional MTI (Weak)	18185580
MIRT017130	hsa-miR-335-5p	Homo sapiens	VMO1	284013	Homo sapiens	Microarray	Functional MTI (Weak)	18185580
MIRT017131	hsa-miR-335-5p	Homo sapiens	ZBTB1	22890	Homo sapiens	Microarray	Functional MTI (Weak)	18185580
MIRT017132	hsa-miR-335-5p	Homo sapiens	IGLV1-36	28826	Homo sapiens	Microarray	Functional MTI (Weak)	18185580
MIRT017133	hsa-miR-335-5p	Homo sapiens	C10orf118	55088	Homo sapiens	Microarray	Functional MTI (Weak)	18185580
MIRT017134	hsa-miR-335-5p	Homo sapiens	DHRS3	9249	Homo sapiens	Microarray	Functional MTI (Weak)	18185580
MIRT017135	hsa-miR-335-5p	Homo sapiens	ZBED2	79413	Homo sapiens	Microarray	Functional MTI (Weak)	18185580
MIRT017136	hsa-miR-335-5p	Homo sapiens	PRAMEF10	343071	Homo sapiens	Microarray	Functional MTI (Weak)	18185580
MIRT017137	hsa-miR-335-5p	Homo sapiens	ADGB	79747	Homo sapiens	Microarray	Functional MTI (Weak)	18185580
MIRT017138	hsa-miR-335-5p	Homo sapiens	HMGCS1	3157	Homo sapiens	Microarray	Functional MTI (Weak)	18185580
MIRT017139	hsa-miR-335-5p	Homo sapiens	ANTXR2	118429	Homo sapiens	Microarray	Functional MTI (Weak)	18185580
MIRT017140	hsa-miR-335-5p	Homo sapiens	FAM47C	442444	Homo sapiens	Microarray	Functional MTI (Weak)	18185580
MIRT017141	hsa-miR-335-5p	Homo sapiens	OPN1SW	611	Homo sapiens	Microarray	Functional MTI (Weak)	18185580
MIRT017142	hsa-miR-335-5p	Homo sapiens	NUTM2B	729262	Homo sapiens	Microarray	Functional MTI (Weak)	18185580
MIRT017143	hsa-miR-335-5p	Homo sapiens	ZFP41	286128	Homo sapiens	Microarray	Functional MTI (Weak)	18185580
MIRT017144	hsa-miR-335-5p	Homo sapiens	HOXC6	3223	Homo sapiens	Microarray	Functional MTI (Weak)	18185580
MIRT017145	hsa-miR-335-5p	Homo sapiens	MMRN1	22915	Homo sapiens	Microarray	Functional MTI (Weak)	18185580
MIRT017146	hsa-miR-335-5p	Homo sapiens	SAG	6295	Homo sapiens	Microarray	Functional MTI (Weak)	18185580
MIRT017147	hsa-miR-335-5p	Homo sapiens	RUFY2	55680	Homo sapiens	Microarray	Functional MTI (Weak)	18185580
MIRT017148	hsa-miR-335-5p	Homo sapiens	WIF1	11197	Homo sapiens	Microarray	Functional MTI (Weak)	18185580
MIRT017149	hsa-miR-335-5p	Homo sapiens	CBLN4	140689	Homo sapiens	Microarray	Functional MTI (Weak)	18185580
MIRT017150	hsa-miR-335-5p	Homo sapiens	FAM214A	56204	Homo sapiens	Microarray	Functional MTI (Weak)	18185580
MIRT017151	hsa-miR-335-5p	Homo sapiens	TAF8	129685	Homo sapiens	Microarray	Functional MTI (Weak)	18185580
MIRT017152	hsa-miR-335-5p	Homo sapiens	MPPED2	744	Homo sapiens	Microarray	Functional MTI (Weak)	18185580
MIRT017153	hsa-miR-335-5p	Homo sapiens	RASSF8	11228	Homo sapiens	Microarray	Functional MTI (Weak)	18185580
MIRT017154	hsa-miR-335-5p	Homo sapiens	WDR59	79726	Homo sapiens	Microarray	Functional MTI (Weak)	18185580
MIRT017155	hsa-miR-335-5p	Homo sapiens	AHNAK	79026	Homo sapiens	Microarray	Functional MTI (Weak)	18185580
MIRT017156	hsa-miR-335-5p	Homo sapiens	RNASE4	6038	Homo sapiens	Microarray	Functional MTI (Weak)	18185580
MIRT017157	hsa-miR-335-5p	Homo sapiens	GPR82	27197	Homo sapiens	Microarray	Functional MTI (Weak)	18185580
MIRT017158	hsa-miR-335-5p	Homo sapiens	TFE3	7030	Homo sapiens	Microarray	Functional MTI (Weak)	18185580
MIRT017159	hsa-miR-335-5p	Homo sapiens	SFRP1	6422	Homo sapiens	Microarray	Functional MTI (Weak)	18185580
MIRT017160	hsa-miR-335-5p	Homo sapiens	SLC34A2	10568	Homo sapiens	Microarray	Functional MTI (Weak)	18185580
MIRT017161	hsa-miR-335-5p	Homo sapiens	PPM1H	57460	Homo sapiens	Microarray	Functional MTI (Weak)	18185580
MIRT017162	hsa-miR-335-5p	Homo sapiens	TRIM2	23321	Homo sapiens	Microarray	Functional MTI (Weak)	18185580
MIRT017163	hsa-miR-335-5p	Homo sapiens	ATP2B4	493	Homo sapiens	Microarray	Functional MTI (Weak)	18185580
MIRT017164	hsa-miR-335-5p	Homo sapiens	FAM63B	54629	Homo sapiens	Microarray	Functional MTI (Weak)	18185580
MIRT017165	hsa-miR-335-5p	Homo sapiens	SH3BP1	23616	Homo sapiens	Microarray	Functional MTI (Weak)	18185580
MIRT017166	hsa-miR-335-5p	Homo sapiens	MCMDC2	157777	Homo sapiens	Microarray	Functional MTI (Weak)	18185580
MIRT017167	hsa-miR-335-5p	Homo sapiens	TRDN	10345	Homo sapiens	Microarray	Functional MTI (Weak)	18185580
MIRT017168	hsa-miR-335-5p	Homo sapiens	C6orf25	80739	Homo sapiens	Microarray	Functional MTI (Weak)	18185580
MIRT017169	hsa-miR-335-5p	Homo sapiens	IL6ST	3572	Homo sapiens	Microarray	Functional MTI (Weak)	18185580
MIRT017170	hsa-miR-335-5p	Homo sapiens	DLG2	1740	Homo sapiens	Microarray	Functional MTI (Weak)	18185580
MIRT017171	hsa-miR-335-5p	Homo sapiens	LEPREL2	10536	Homo sapiens	Microarray	Functional MTI (Weak)	18185580
MIRT017172	hsa-miR-335-5p	Homo sapiens	JHDM1D	80853	Homo sapiens	Microarray	Functional MTI (Weak)	18185580
MIRT017173	hsa-miR-335-5p	Homo sapiens	PLEKHA1	59338	Homo sapiens	Microarray	Functional MTI (Weak)	18185580
MIRT017174	hsa-miR-335-5p	Homo sapiens	PLLP	51090	Homo sapiens	Microarray	Functional MTI (Weak)	18185580
MIRT017175	hsa-miR-335-5p	Homo sapiens	KLRK1	22914	Homo sapiens	Microarray	Functional MTI (Weak)	18185580
MIRT017176	hsa-miR-335-5p	Homo sapiens	FAM102A	399665	Homo sapiens	Microarray	Functional MTI (Weak)	18185580
MIRT017177	hsa-miR-335-5p	Homo sapiens	LIN7A	8825	Homo sapiens	Microarray	Functional MTI (Weak)	18185580
MIRT017178	hsa-miR-335-5p	Homo sapiens	KMT2A	4297	Homo sapiens	Microarray	Functional MTI (Weak)	18185580
MIRT017179	hsa-miR-335-5p	Homo sapiens	GSDMB	55876	Homo sapiens	Microarray	Functional MTI (Weak)	18185580
MIRT017180	hsa-miR-335-5p	Homo sapiens	MFSD6L	162387	Homo sapiens	Microarray	Functional MTI (Weak)	18185580
MIRT017181	hsa-miR-335-5p	Homo sapiens	CDK20	23552	Homo sapiens	Microarray	Functional MTI (Weak)	18185580
MIRT017182	hsa-miR-335-5p	Homo sapiens	NLRC4	58484	Homo sapiens	Microarray	Functional MTI (Weak)	18185580
MIRT017183	hsa-miR-335-5p	Homo sapiens	EGFLAM	133584	Homo sapiens	Microarray	Functional MTI (Weak)	18185580
MIRT017184	hsa-miR-335-5p	Homo sapiens	TRBV7-3	28595	Homo sapiens	Microarray	Functional MTI (Weak)	18185580
MIRT017185	hsa-miR-335-5p	Homo sapiens	GP9	2815	Homo sapiens	Microarray	Functional MTI (Weak)	18185580
MIRT017186	hsa-miR-335-5p	Homo sapiens	ZNF660	285349	Homo sapiens	Microarray	Functional MTI (Weak)	18185580
MIRT017187	hsa-miR-335-5p	Homo sapiens	CA14	23632	Homo sapiens	Microarray	Functional MTI (Weak)	18185580
MIRT017188	hsa-miR-335-5p	Homo sapiens	C7orf69	80099	Homo sapiens	Microarray	Functional MTI (Weak)	18185580
MIRT017189	hsa-miR-335-5p	Homo sapiens	OR1C1	26188	Homo sapiens	Microarray	Functional MTI (Weak)	18185580
MIRT017190	hsa-miR-335-5p	Homo sapiens	PDE5A	8654	Homo sapiens	Microarray	Functional MTI (Weak)	18185580
MIRT017191	hsa-miR-335-5p	Homo sapiens	ZER1	10444	Homo sapiens	Microarray	Functional MTI (Weak)	18185580
MIRT017192	hsa-miR-335-5p	Homo sapiens	PRAMEF2	65122	Homo sapiens	Microarray	Functional MTI (Weak)	18185580
MIRT017193	hsa-miR-335-5p	Homo sapiens	CPNE6	9362	Homo sapiens	Microarray	Functional MTI (Weak)	18185580
MIRT017194	hsa-miR-335-5p	Homo sapiens	KIAA1324L	222223	Homo sapiens	Microarray	Functional MTI (Weak)	18185580
MIRT017195	hsa-miR-335-5p	Homo sapiens	TMEM8A	58986	Homo sapiens	Microarray	Functional MTI (Weak)	18185580
MIRT017196	hsa-miR-335-5p	Homo sapiens	KCNJ9	3765	Homo sapiens	Microarray	Functional MTI (Weak)	18185580
MIRT017197	hsa-miR-335-5p	Homo sapiens	CEACAM3	1084	Homo sapiens	Microarray	Functional MTI (Weak)	18185580
MIRT017198	hsa-miR-335-5p	Homo sapiens	TVP23A	780776	Homo sapiens	Microarray	Functional MTI (Weak)	18185580
MIRT017199	hsa-miR-335-5p	Homo sapiens	GAB2	9846	Homo sapiens	Microarray	Functional MTI (Weak)	18185580
MIRT017200	hsa-miR-335-5p	Homo sapiens	UBN1	29855	Homo sapiens	Microarray	Functional MTI (Weak)	18185580
MIRT017201	hsa-miR-335-5p	Homo sapiens	FOXO3	2309	Homo sapiens	Microarray	Functional MTI (Weak)	18185580
MIRT017202	hsa-miR-335-5p	Homo sapiens	IRF2	3660	Homo sapiens	Microarray	Functional MTI (Weak)	18185580
MIRT017203	hsa-miR-335-5p	Homo sapiens	STOX1	219736	Homo sapiens	Microarray	Functional MTI (Weak)	18185580
MIRT017204	hsa-miR-335-5p	Homo sapiens	HDAC6	10013	Homo sapiens	Microarray	Functional MTI (Weak)	18185580
MIRT017205	hsa-miR-335-5p	Homo sapiens	DDR1	780	Homo sapiens	Microarray	Functional MTI (Weak)	18185580
MIRT017206	hsa-miR-335-5p	Homo sapiens	ABLIM1	3983	Homo sapiens	Microarray	Functional MTI (Weak)	18185580
MIRT017207	hsa-miR-335-5p	Homo sapiens	ACOT6	641372	Homo sapiens	Microarray	Functional MTI (Weak)	18185580
MIRT017208	hsa-miR-335-5p	Homo sapiens	C6orf201	404220	Homo sapiens	Microarray	Functional MTI (Weak)	18185580
MIRT017209	hsa-miR-335-5p	Homo sapiens	ZNF251	90987	Homo sapiens	Microarray	Functional MTI (Weak)	18185580
MIRT017210	hsa-miR-335-5p	Homo sapiens	PRAMEF16	654348	Homo sapiens	Microarray	Functional MTI (Weak)	18185580
MIRT017211	hsa-miR-335-5p	Homo sapiens	TULP4	56995	Homo sapiens	Microarray	Functional MTI (Weak)	18185580
MIRT017212	hsa-miR-335-5p	Homo sapiens	FGF8	2253	Homo sapiens	Microarray	Functional MTI (Weak)	18185580
MIRT017213	hsa-miR-335-5p	Homo sapiens	ACSL1	2180	Homo sapiens	Microarray	Functional MTI (Weak)	18185580
MIRT017214	hsa-miR-335-5p	Homo sapiens	RSPO4	343637	Homo sapiens	Microarray	Functional MTI (Weak)	18185580
MIRT017215	hsa-miR-335-5p	Homo sapiens	TACR3	6870	Homo sapiens	Microarray	Functional MTI (Weak)	18185580
MIRT017216	hsa-miR-335-5p	Homo sapiens	HSD17B7P2	158160	Homo sapiens	Microarray	Functional MTI (Weak)	18185580
MIRT017217	hsa-miR-335-5p	Homo sapiens	CEL	1056	Homo sapiens	Microarray	Functional MTI (Weak)	18185580
MIRT017218	hsa-miR-335-5p	Homo sapiens	BCL2A1	597	Homo sapiens	Microarray	Functional MTI (Weak)	18185580
MIRT017219	hsa-miR-335-5p	Homo sapiens	OR2J1	442185	Homo sapiens	Microarray	Functional MTI (Weak)	18185580
MIRT017220	hsa-miR-335-5p	Homo sapiens	ANXA11	311	Homo sapiens	Microarray	Functional MTI (Weak)	18185580
MIRT017221	hsa-miR-335-5p	Homo sapiens	NDST3	9348	Homo sapiens	Microarray	Functional MTI (Weak)	18185580
MIRT017222	hsa-miR-335-5p	Homo sapiens	KLK3	354	Homo sapiens	Microarray	Functional MTI (Weak)	18185580
MIRT017223	hsa-miR-335-5p	Homo sapiens	USP44	84101	Homo sapiens	Microarray	Functional MTI (Weak)	18185580
MIRT017224	hsa-miR-335-5p	Homo sapiens	SEMA4D	10507	Homo sapiens	Microarray	Functional MTI (Weak)	18185580
MIRT017225	hsa-miR-335-5p	Homo sapiens	PYGM	5837	Homo sapiens	Microarray	Functional MTI (Weak)	18185580
MIRT017226	hsa-miR-335-5p	Homo sapiens	PTPLAD2	401494	Homo sapiens	Microarray	Functional MTI (Weak)	18185580
MIRT017227	hsa-miR-335-5p	Homo sapiens	CEACAM21	90273	Homo sapiens	Microarray	Functional MTI (Weak)	18185580
MIRT017228	hsa-miR-335-5p	Homo sapiens	SERPINF1	5176	Homo sapiens	Microarray	Functional MTI (Weak)	18185580
MIRT017229	hsa-miR-335-5p	Homo sapiens	COG3	83548	Homo sapiens	Microarray	Functional MTI (Weak)	18185580
MIRT017230	hsa-miR-335-5p	Homo sapiens	TP53AIP1	63970	Homo sapiens	Microarray	Functional MTI (Weak)	18185580
MIRT017231	hsa-miR-335-5p	Homo sapiens	SLC27A6	28965	Homo sapiens	Microarray	Functional MTI (Weak)	18185580
MIRT017232	hsa-miR-335-5p	Homo sapiens	SWT1	54823	Homo sapiens	Microarray	Functional MTI (Weak)	18185580
MIRT017233	hsa-miR-335-5p	Homo sapiens	UHMK1	127933	Homo sapiens	Microarray	Functional MTI (Weak)	18185580
MIRT017234	hsa-miR-335-5p	Homo sapiens	FOLR2	2350	Homo sapiens	Microarray	Functional MTI (Weak)	18185580
MIRT017235	hsa-miR-335-5p	Homo sapiens	TGIF2LY	90655	Homo sapiens	Microarray	Functional MTI (Weak)	18185580
MIRT017236	hsa-miR-335-5p	Homo sapiens	CHST8	64377	Homo sapiens	Microarray	Functional MTI (Weak)	18185580
MIRT017237	hsa-miR-335-5p	Homo sapiens	CPT1B	1375	Homo sapiens	Microarray	Functional MTI (Weak)	18185580
MIRT017238	hsa-miR-335-5p	Homo sapiens	IRAK2	3656	Homo sapiens	Microarray	Functional MTI (Weak)	18185580
MIRT017239	hsa-miR-335-5p	Homo sapiens	ATP8B2	57198	Homo sapiens	Microarray	Functional MTI (Weak)	18185580
MIRT017240	hsa-miR-335-5p	Homo sapiens	CD79A	973	Homo sapiens	Microarray	Functional MTI (Weak)	18185580
MIRT017241	hsa-miR-335-5p	Homo sapiens	IYD	389434	Homo sapiens	Microarray	Functional MTI (Weak)	18185580
MIRT017242	hsa-miR-335-5p	Homo sapiens	IL27	246778	Homo sapiens	Microarray	Functional MTI (Weak)	18185580
MIRT017243	hsa-miR-335-5p	Homo sapiens	DPY19L2	283417	Homo sapiens	Microarray	Functional MTI (Weak)	18185580
MIRT017244	hsa-miR-335-5p	Homo sapiens	SYT5	6861	Homo sapiens	Microarray	Functional MTI (Weak)	18185580
MIRT017245	hsa-miR-335-5p	Homo sapiens	LGALS9	3965	Homo sapiens	Microarray	Functional MTI (Weak)	18185580
MIRT017246	hsa-miR-335-5p	Homo sapiens	EMX2	2018	Homo sapiens	Microarray	Functional MTI (Weak)	18185580
MIRT017247	hsa-miR-335-5p	Homo sapiens	DOCK9	23348	Homo sapiens	Microarray	Functional MTI (Weak)	18185580
MIRT017248	hsa-miR-335-5p	Homo sapiens	APOL2	23780	Homo sapiens	Microarray	Functional MTI (Weak)	18185580
MIRT017249	hsa-miR-335-5p	Homo sapiens	KCNK4	50801	Homo sapiens	Microarray	Functional MTI (Weak)	18185580
MIRT017250	hsa-miR-335-5p	Homo sapiens	GOLGB1	2804	Homo sapiens	Microarray	Functional MTI (Weak)	18185580
MIRT017251	hsa-miR-335-5p	Homo sapiens	RARG	5916	Homo sapiens	Microarray	Functional MTI (Weak)	18185580
MIRT017252	hsa-miR-335-5p	Homo sapiens	SKAP2	8935	Homo sapiens	Microarray	Functional MTI (Weak)	18185580
MIRT017253	hsa-miR-335-5p	Homo sapiens	PCMTD1	115294	Homo sapiens	Microarray	Functional MTI (Weak)	18185580
MIRT017254	hsa-miR-335-5p	Homo sapiens	CDKN1A	1026	Homo sapiens	Microarray	Functional MTI (Weak)	18185580
MIRT017255	hsa-miR-335-5p	Homo sapiens	ZNF334	55713	Homo sapiens	Microarray	Functional MTI (Weak)	18185580
MIRT017256	hsa-miR-335-5p	Homo sapiens	CRYBA2	1412	Homo sapiens	Microarray	Functional MTI (Weak)	18185580
MIRT017257	hsa-miR-335-5p	Homo sapiens	FAM120B	84498	Homo sapiens	Microarray	Functional MTI (Weak)	18185580
MIRT017258	hsa-miR-335-5p	Homo sapiens	KCNK5	8645	Homo sapiens	Microarray	Functional MTI (Weak)	18185580
MIRT017259	hsa-miR-335-5p	Homo sapiens	SLC9A7	84679	Homo sapiens	Microarray	Functional MTI (Weak)	18185580
MIRT017260	hsa-miR-335-5p	Homo sapiens	DMPK	1760	Homo sapiens	Microarray	Functional MTI (Weak)	18185580
MIRT017261	hsa-miR-335-5p	Homo sapiens	TRIM40	135644	Homo sapiens	Microarray	Functional MTI (Weak)	18185580
MIRT017262	hsa-miR-335-5p	Homo sapiens	DCHS2	54798	Homo sapiens	Microarray	Functional MTI (Weak)	18185580
MIRT017263	hsa-miR-335-5p	Homo sapiens	ILDR1	286676	Homo sapiens	Microarray	Functional MTI (Weak)	18185580
MIRT017264	hsa-miR-335-5p	Homo sapiens	CYB561	1534	Homo sapiens	Microarray	Functional MTI (Weak)	18185580
MIRT017265	hsa-miR-335-5p	Homo sapiens	CDH5	1003	Homo sapiens	Microarray	Functional MTI (Weak)	18185580
MIRT017266	hsa-miR-335-5p	Homo sapiens	KRTAP4-2	85291	Homo sapiens	Microarray	Functional MTI (Weak)	18185580
MIRT017267	hsa-miR-335-5p	Homo sapiens	CNTNAP3	79937	Homo sapiens	Microarray	Functional MTI (Weak)	18185580
MIRT017268	hsa-miR-335-5p	Homo sapiens	BCL7A	605	Homo sapiens	Microarray	Functional MTI (Weak)	18185580
MIRT017269	hsa-miR-335-5p	Homo sapiens	FCRLA	84824	Homo sapiens	Microarray	Functional MTI (Weak)	18185580
MIRT017270	hsa-miR-335-5p	Homo sapiens	CLMN	79789	Homo sapiens	Microarray	Functional MTI (Weak)	18185580
MIRT017271	hsa-miR-335-5p	Homo sapiens	CD5L	922	Homo sapiens	Microarray	Functional MTI (Weak)	18185580
MIRT017272	hsa-miR-335-5p	Homo sapiens	SERPINB5	5268	Homo sapiens	Microarray	Functional MTI (Weak)	18185580
MIRT017273	hsa-miR-335-5p	Homo sapiens	PPFIBP1	8496	Homo sapiens	Microarray	Functional MTI (Weak)	18185580
MIRT017274	hsa-miR-335-5p	Homo sapiens	RIIAD1	284485	Homo sapiens	Microarray	Functional MTI (Weak)	18185580
MIRT017275	hsa-miR-335-5p	Homo sapiens	ADCK1	57143	Homo sapiens	Microarray	Functional MTI (Weak)	18185580
MIRT017276	hsa-miR-335-5p	Homo sapiens	SLC4A8	9498	Homo sapiens	Microarray	Functional MTI (Weak)	18185580
MIRT017277	hsa-miR-335-5p	Homo sapiens	CLIP2	7461	Homo sapiens	Microarray	Functional MTI (Weak)	18185580
MIRT017278	hsa-miR-335-5p	Homo sapiens	TNNC1	7134	Homo sapiens	Microarray	Functional MTI (Weak)	18185580
MIRT017279	hsa-miR-335-5p	Homo sapiens	HCAR1	27198	Homo sapiens	Microarray	Functional MTI (Weak)	18185580
MIRT017280	hsa-miR-335-5p	Homo sapiens	RGS16	6004	Homo sapiens	Microarray	Functional MTI (Weak)	18185580
MIRT017281	hsa-miR-335-5p	Homo sapiens	KCNA4	3739	Homo sapiens	Microarray	Functional MTI (Weak)	18185580
MIRT017282	hsa-miR-335-5p	Homo sapiens	RNF186	54546	Homo sapiens	Microarray	Functional MTI (Weak)	18185580
MIRT017283	hsa-miR-335-5p	Homo sapiens	SPATA20	64847	Homo sapiens	Microarray	Functional MTI (Weak)	18185580
MIRT017284	hsa-miR-335-5p	Homo sapiens	CYTH1	9267	Homo sapiens	Microarray	Functional MTI (Weak)	18185580
MIRT017285	hsa-miR-335-5p	Homo sapiens	CCDC103	388389	Homo sapiens	Microarray	Functional MTI (Weak)	18185580
MIRT017286	hsa-miR-335-5p	Homo sapiens	PLA2G7	7941	Homo sapiens	Microarray	Functional MTI (Weak)	18185580
MIRT017287	hsa-miR-335-5p	Homo sapiens	JUND	3727	Homo sapiens	Microarray	Functional MTI (Weak)	18185580
MIRT017288	hsa-miR-335-5p	Homo sapiens	FAM214B	80256	Homo sapiens	Microarray	Functional MTI (Weak)	18185580
MIRT017289	hsa-miR-335-5p	Homo sapiens	LBP	3929	Homo sapiens	Microarray	Functional MTI (Weak)	18185580
MIRT017290	hsa-miR-335-5p	Homo sapiens	DBH	1621	Homo sapiens	Microarray	Functional MTI (Weak)	18185580
MIRT017291	hsa-miR-335-5p	Homo sapiens	PLCE1	51196	Homo sapiens	Microarray	Functional MTI (Weak)	18185580
MIRT017292	hsa-miR-335-5p	Homo sapiens	RAB26	25837	Homo sapiens	Microarray	Functional MTI (Weak)	18185580
MIRT017293	hsa-miR-335-5p	Homo sapiens	PYGB	5834	Homo sapiens	Microarray	Functional MTI (Weak)	18185580
MIRT017294	hsa-miR-335-5p	Homo sapiens	C10orf99	387695	Homo sapiens	Microarray	Functional MTI (Weak)	18185580
MIRT017295	hsa-miR-335-5p	Homo sapiens	TMPRSS11D	9407	Homo sapiens	Microarray	Functional MTI (Weak)	18185580
MIRT017296	hsa-miR-335-5p	Homo sapiens	CD22	933	Homo sapiens	Microarray	Functional MTI (Weak)	18185580
MIRT017297	hsa-miR-335-5p	Homo sapiens	CCDC88C	440193	Homo sapiens	Microarray	Functional MTI (Weak)	18185580
MIRT017298	hsa-miR-335-5p	Homo sapiens	ABCA5	23461	Homo sapiens	Microarray	Functional MTI (Weak)	18185580
MIRT017299	hsa-miR-335-5p	Homo sapiens	TNIK	23043	Homo sapiens	Microarray	Functional MTI (Weak)	18185580
MIRT017300	hsa-miR-335-5p	Homo sapiens	TLL1	7092	Homo sapiens	Microarray	Functional MTI (Weak)	18185580
MIRT017301	hsa-miR-335-5p	Homo sapiens	SLC13A4	26266	Homo sapiens	Microarray	Functional MTI (Weak)	18185580
MIRT017302	hsa-miR-335-5p	Homo sapiens	JAKMIP3	282973	Homo sapiens	Microarray	Functional MTI (Weak)	18185580
MIRT017303	hsa-miR-335-5p	Homo sapiens	AKAP13	11214	Homo sapiens	Microarray	Functional MTI (Weak)	18185580
MIRT017304	hsa-miR-335-5p	Homo sapiens	PGM5	5239	Homo sapiens	Microarray	Functional MTI (Weak)	18185580
MIRT017305	hsa-miR-335-5p	Homo sapiens	NANOG	79923	Homo sapiens	Microarray	Functional MTI (Weak)	18185580
MIRT017306	hsa-miR-335-5p	Homo sapiens	PIK3CA	5290	Homo sapiens	Microarray	Functional MTI (Weak)	18185580
MIRT017307	hsa-miR-335-5p	Homo sapiens	S100Z	170591	Homo sapiens	Microarray	Functional MTI (Weak)	18185580
MIRT017308	hsa-miR-335-5p	Homo sapiens	IGSF10	285313	Homo sapiens	Microarray	Functional MTI (Weak)	18185580
MIRT017309	hsa-miR-335-5p	Homo sapiens	SLC1A4	6509	Homo sapiens	Microarray	Functional MTI (Weak)	18185580
MIRT017310	hsa-miR-335-5p	Homo sapiens	RALGDS	5900	Homo sapiens	Microarray	Functional MTI (Weak)	18185580
MIRT017311	hsa-miR-335-5p	Homo sapiens	ETV5	2119	Homo sapiens	Microarray	Functional MTI (Weak)	18185580
MIRT017312	hsa-miR-335-5p	Homo sapiens	SH3TC2	79628	Homo sapiens	Microarray	Functional MTI (Weak)	18185580
MIRT017313	hsa-miR-335-5p	Homo sapiens	PLXNA4	91584	Homo sapiens	Microarray	Functional MTI (Weak)	18185580
MIRT017314	hsa-miR-335-5p	Homo sapiens	NBPF23	100302292	Homo sapiens	Microarray	Functional MTI (Weak)	18185580
MIRT017315	hsa-miR-335-5p	Homo sapiens	MYCT1	80177	Homo sapiens	Microarray	Functional MTI (Weak)	18185580
MIRT017316	hsa-miR-335-5p	Homo sapiens	GRIN2D	2906	Homo sapiens	Microarray	Functional MTI (Weak)	18185580
MIRT017317	hsa-miR-335-5p	Homo sapiens	LONRF2	164832	Homo sapiens	Microarray	Functional MTI (Weak)	18185580
MIRT017318	hsa-miR-335-5p	Homo sapiens	PJA2	9867	Homo sapiens	Microarray	Functional MTI (Weak)	18185580
MIRT017319	hsa-miR-335-5p	Homo sapiens	LIN28A	79727	Homo sapiens	Microarray	Functional MTI (Weak)	18185580
MIRT017320	hsa-miR-335-5p	Homo sapiens	PMEL	6490	Homo sapiens	Microarray	Functional MTI (Weak)	18185580
MIRT017321	hsa-miR-335-5p	Homo sapiens	PLXNC1	10154	Homo sapiens	Microarray	Functional MTI (Weak)	18185580
MIRT017322	hsa-miR-335-5p	Homo sapiens	SNORD116-21	100033432	Homo sapiens	Microarray	Functional MTI (Weak)	18185580
MIRT017323	hsa-miR-335-5p	Homo sapiens	VPS39	23339	Homo sapiens	Microarray	Functional MTI (Weak)	18185580
MIRT017324	hsa-miR-335-5p	Homo sapiens	ABAT	18	Homo sapiens	Microarray	Functional MTI (Weak)	18185580
MIRT017325	hsa-miR-335-5p	Homo sapiens	NTN4	59277	Homo sapiens	Microarray	Functional MTI (Weak)	18185580
MIRT017326	hsa-miR-335-5p	Homo sapiens	SCNN1D	6339	Homo sapiens	Microarray	Functional MTI (Weak)	18185580
MIRT017327	hsa-miR-335-5p	Homo sapiens	UNC13D	201294	Homo sapiens	Microarray	Functional MTI (Weak)	18185580
MIRT017328	hsa-miR-335-5p	Homo sapiens	PPP1R3B	79660	Homo sapiens	Microarray	Functional MTI (Weak)	18185580
MIRT017329	hsa-miR-335-5p	Homo sapiens	SLC6A9	6536	Homo sapiens	Microarray	Functional MTI (Weak)	18185580
MIRT017330	hsa-miR-335-5p	Homo sapiens	SCD	6319	Homo sapiens	Microarray	Functional MTI (Weak)	18185580
MIRT017331	hsa-miR-335-5p	Homo sapiens	GJB6	10804	Homo sapiens	Microarray	Functional MTI (Weak)	18185580
MIRT017332	hsa-miR-335-5p	Homo sapiens	EFCAB5	374786	Homo sapiens	Microarray	Functional MTI (Weak)	18185580
MIRT017333	hsa-miR-335-5p	Homo sapiens	C14orf178	283579	Homo sapiens	Microarray	Functional MTI (Weak)	18185580
MIRT017334	hsa-miR-335-5p	Homo sapiens	DTX1	1840	Homo sapiens	Microarray	Functional MTI (Weak)	18185580
MIRT017335	hsa-miR-335-5p	Homo sapiens	NR1D1	9572	Homo sapiens	Microarray	Functional MTI (Weak)	18185580
MIRT017336	hsa-miR-335-5p	Homo sapiens	NEUROG1	4762	Homo sapiens	Microarray	Functional MTI (Weak)	18185580
MIRT017337	hsa-miR-335-5p	Homo sapiens	NCF4	4689	Homo sapiens	Microarray	Functional MTI (Weak)	18185580
MIRT017338	hsa-miR-335-5p	Homo sapiens	KRT71	112802	Homo sapiens	Microarray	Functional MTI (Weak)	18185580
MIRT017339	hsa-miR-335-5p	Homo sapiens	C14orf28	122525	Homo sapiens	Microarray	Functional MTI (Weak)	18185580
MIRT017340	hsa-miR-335-5p	Homo sapiens	HMP19	51617	Homo sapiens	Microarray	Functional MTI (Weak)	18185580
MIRT017341	hsa-miR-335-5p	Homo sapiens	LMOD3	56203	Homo sapiens	Microarray	Functional MTI (Weak)	18185580
MIRT017342	hsa-miR-335-5p	Homo sapiens	COL10A1	1300	Homo sapiens	Microarray	Functional MTI (Weak)	18185580
MIRT017343	hsa-miR-335-5p	Homo sapiens	CDCP1	64866	Homo sapiens	Microarray	Functional MTI (Weak)	18185580
MIRT017344	hsa-miR-335-5p	Homo sapiens	GUCY1A2	2977	Homo sapiens	Microarray	Functional MTI (Weak)	18185580
MIRT017345	hsa-miR-335-5p	Homo sapiens	PPARGC1A	10891	Homo sapiens	Microarray	Functional MTI (Weak)	18185580
MIRT017346	hsa-miR-335-5p	Homo sapiens	C6orf132	647024	Homo sapiens	Microarray	Functional MTI (Weak)	18185580
MIRT017347	hsa-miR-335-5p	Homo sapiens	UBE2O	63893	Homo sapiens	Microarray	Functional MTI (Weak)	18185580
MIRT017348	hsa-miR-335-5p	Homo sapiens	ARRDC3	57561	Homo sapiens	Microarray	Functional MTI (Weak)	18185580
MIRT017349	hsa-miR-335-5p	Homo sapiens	DMBX1	127343	Homo sapiens	Microarray	Functional MTI (Weak)	18185580
MIRT017350	hsa-miR-335-5p	Homo sapiens	PPP1R3C	5507	Homo sapiens	Microarray	Functional MTI (Weak)	18185580
MIRT017351	hsa-miR-335-5p	Homo sapiens	PRICKLE2	166336	Homo sapiens	Microarray	Functional MTI (Weak)	18185580
MIRT017352	hsa-miR-335-5p	Homo sapiens	OR2L2	26246	Homo sapiens	Microarray	Functional MTI (Weak)	18185580
MIRT017353	hsa-miR-335-5p	Homo sapiens	ADIG	149685	Homo sapiens	Microarray	Functional MTI (Weak)	18185580
MIRT017354	hsa-miR-335-5p	Homo sapiens	ERC1	23085	Homo sapiens	Microarray	Functional MTI (Weak)	18185580
MIRT017355	hsa-miR-335-5p	Homo sapiens	RNF157	114804	Homo sapiens	Microarray	Functional MTI (Weak)	18185580
MIRT017356	hsa-miR-335-5p	Homo sapiens	AMHR2	269	Homo sapiens	Microarray	Functional MTI (Weak)	18185580
MIRT017357	hsa-miR-335-5p	Homo sapiens	CDK19	23097	Homo sapiens	Microarray	Functional MTI (Weak)	18185580
MIRT017358	hsa-miR-335-5p	Homo sapiens	CXCR2	3579	Homo sapiens	Microarray	Functional MTI (Weak)	18185580
MIRT017359	hsa-miR-335-5p	Homo sapiens	SLC22A15	55356	Homo sapiens	Microarray	Functional MTI (Weak)	18185580
MIRT017360	hsa-miR-335-5p	Homo sapiens	FADS2	9415	Homo sapiens	Microarray	Functional MTI (Weak)	18185580
MIRT017361	hsa-miR-335-5p	Homo sapiens	ZFP28	140612	Homo sapiens	Microarray	Functional MTI (Weak)	18185580
MIRT017362	hsa-miR-335-5p	Homo sapiens	PRPF40B	25766	Homo sapiens	Microarray	Functional MTI (Weak)	18185580
MIRT017363	hsa-miR-335-5p	Homo sapiens	TGFB2	7042	Homo sapiens	Microarray	Functional MTI (Weak)	18185580
MIRT017364	hsa-miR-335-5p	Homo sapiens	CHAT	1103	Homo sapiens	Microarray	Functional MTI (Weak)	18185580
MIRT017365	hsa-miR-335-5p	Homo sapiens	BARX2	8538	Homo sapiens	Microarray	Functional MTI (Weak)	18185580
MIRT017366	hsa-miR-335-5p	Homo sapiens	CCPG1	9236	Homo sapiens	Microarray	Functional MTI (Weak)	18185580
MIRT017367	hsa-miR-335-5p	Homo sapiens	COLQ	8292	Homo sapiens	Microarray	Functional MTI (Weak)	18185580
MIRT017368	hsa-miR-335-5p	Homo sapiens	PCYT2	5833	Homo sapiens	Microarray	Functional MTI (Weak)	18185580
MIRT017369	hsa-miR-335-5p	Homo sapiens	GABRQ	55879	Homo sapiens	Microarray	Functional MTI (Weak)	18185580
MIRT017370	hsa-miR-335-5p	Homo sapiens	CTRB2	440387	Homo sapiens	Microarray	Functional MTI (Weak)	18185580
MIRT017371	hsa-miR-335-5p	Homo sapiens	PLIN4	729359	Homo sapiens	Microarray	Functional MTI (Weak)	18185580
MIRT017372	hsa-miR-335-5p	Homo sapiens	CECR5-AS1	100130717	Homo sapiens	Microarray	Functional MTI (Weak)	18185580
MIRT017373	hsa-miR-335-5p	Homo sapiens	APOH	350	Homo sapiens	Microarray	Functional MTI (Weak)	18185580
MIRT017374	hsa-miR-335-5p	Homo sapiens	SLC10A7	84068	Homo sapiens	Microarray	Functional MTI (Weak)	18185580
MIRT017375	hsa-miR-335-5p	Homo sapiens	FCGRT	2217	Homo sapiens	Microarray	Functional MTI (Weak)	18185580
MIRT017376	hsa-miR-335-5p	Homo sapiens	PTPRA	5786	Homo sapiens	Microarray	Functional MTI (Weak)	18185580
MIRT017377	hsa-miR-335-5p	Homo sapiens	TMEFF2	23671	Homo sapiens	Microarray	Functional MTI (Weak)	18185580
MIRT017378	hsa-miR-335-5p	Homo sapiens	SELENBP1	8991	Homo sapiens	Microarray	Functional MTI (Weak)	18185580
MIRT017379	hsa-miR-335-5p	Homo sapiens	SHC4	399694	Homo sapiens	Microarray	Functional MTI (Weak)	18185580
MIRT017380	hsa-miR-335-5p	Homo sapiens	MYT1L	23040	Homo sapiens	Microarray	Functional MTI (Weak)	18185580
MIRT017381	hsa-miR-335-5p	Homo sapiens	KLHL34	257240	Homo sapiens	Microarray	Functional MTI (Weak)	18185580
MIRT017382	hsa-miR-335-5p	Homo sapiens	ARL5B	221079	Homo sapiens	Microarray	Functional MTI (Weak)	18185580
MIRT017383	hsa-miR-335-5p	Homo sapiens	CNTNAP3B	728577	Homo sapiens	Microarray	Functional MTI (Weak)	18185580
MIRT017384	hsa-miR-335-5p	Homo sapiens	PTGES	9536	Homo sapiens	Microarray	Functional MTI (Weak)	18185580
MIRT017385	hsa-miR-335-5p	Homo sapiens	C2orf16	84226	Homo sapiens	Microarray	Functional MTI (Weak)	18185580
MIRT017386	hsa-miR-335-5p	Homo sapiens	SCG3	29106	Homo sapiens	Microarray	Functional MTI (Weak)	18185580
MIRT017387	hsa-miR-335-5p	Homo sapiens	NOTCH3	4854	Homo sapiens	Microarray	Functional MTI (Weak)	18185580
MIRT017388	hsa-miR-335-5p	Homo sapiens	LY6G6E	79136	Homo sapiens	Microarray	Functional MTI (Weak)	18185580
MIRT017389	hsa-miR-335-5p	Homo sapiens	CRB3	92359	Homo sapiens	Microarray	Functional MTI (Weak)	18185580
MIRT017390	hsa-miR-335-5p	Homo sapiens	SRL	6345	Homo sapiens	Microarray	Functional MTI (Weak)	18185580
MIRT017391	hsa-miR-335-5p	Homo sapiens	CDK17	5128	Homo sapiens	Microarray	Functional MTI (Weak)	18185580
MIRT017392	hsa-miR-335-5p	Homo sapiens	FOXI1	2299	Homo sapiens	Microarray	Functional MTI (Weak)	18185580
MIRT017393	hsa-miR-335-5p	Homo sapiens	PLSCR4	57088	Homo sapiens	Microarray	Functional MTI (Weak)	18185580
MIRT017394	hsa-miR-335-5p	Homo sapiens	SELPLG	6404	Homo sapiens	Microarray	Functional MTI (Weak)	18185580
MIRT017395	hsa-miR-335-5p	Homo sapiens	CLDN4	1364	Homo sapiens	Microarray	Functional MTI (Weak)	18185580
MIRT017396	hsa-miR-335-5p	Homo sapiens	LINC00470	56651	Homo sapiens	Microarray	Functional MTI (Weak)	18185580
MIRT017397	hsa-miR-335-5p	Homo sapiens	SPATA6	54558	Homo sapiens	Microarray	Functional MTI (Weak)	18185580
MIRT017398	hsa-miR-335-5p	Homo sapiens	R3HDML	140902	Homo sapiens	Microarray	Functional MTI (Weak)	18185580
MIRT017399	hsa-miR-335-5p	Homo sapiens	ABCA8	10351	Homo sapiens	Microarray	Functional MTI (Weak)	18185580
MIRT017400	hsa-miR-335-5p	Homo sapiens	SNX29	92017	Homo sapiens	Microarray	Functional MTI (Weak)	18185580
MIRT017401	hsa-miR-335-5p	Homo sapiens	ABCA7	10347	Homo sapiens	Microarray	Functional MTI (Weak)	18185580
MIRT017402	hsa-miR-335-5p	Homo sapiens	FAM114A1	92689	Homo sapiens	Microarray	Functional MTI (Weak)	18185580
MIRT017403	hsa-miR-335-5p	Homo sapiens	ABTB1	80325	Homo sapiens	Microarray	Functional MTI (Weak)	18185580
MIRT017404	hsa-miR-335-5p	Homo sapiens	MYCL1	4610	Homo sapiens	Microarray	Functional MTI (Weak)	18185580
MIRT017405	hsa-miR-335-5p	Homo sapiens	SULT2A1	6822	Homo sapiens	Microarray	Functional MTI (Weak)	18185580
MIRT017406	hsa-miR-335-5p	Homo sapiens	AK7	122481	Homo sapiens	Microarray	Functional MTI (Weak)	18185580
MIRT017407	hsa-miR-335-5p	Homo sapiens	MIR30C2	407032	Homo sapiens	Microarray	Functional MTI (Weak)	18185580
MIRT017408	hsa-miR-335-5p	Homo sapiens	RHBDF2	79651	Homo sapiens	Microarray	Functional MTI (Weak)	18185580
MIRT017409	hsa-miR-335-5p	Homo sapiens	TRPM4	54795	Homo sapiens	Microarray	Functional MTI (Weak)	18185580
MIRT017410	hsa-miR-335-5p	Homo sapiens	TKTL1	8277	Homo sapiens	Microarray	Functional MTI (Weak)	18185580
MIRT017411	hsa-miR-335-5p	Homo sapiens	IGFBP2	3485	Homo sapiens	Microarray	Functional MTI (Weak)	18185580
MIRT017412	hsa-miR-335-5p	Homo sapiens	PLEKHB1	58473	Homo sapiens	Microarray	Functional MTI (Weak)	18185580
MIRT017413	hsa-miR-335-5p	Homo sapiens	THAP3	90326	Homo sapiens	Microarray	Functional MTI (Weak)	18185580
MIRT017414	hsa-miR-335-5p	Homo sapiens	COL11A1	1301	Homo sapiens	Microarray	Functional MTI (Weak)	18185580
MIRT017415	hsa-miR-335-5p	Homo sapiens	MAGI1	9223	Homo sapiens	Microarray	Functional MTI (Weak)	18185580
MIRT017416	hsa-miR-335-5p	Homo sapiens	EHBP1L1	254102	Homo sapiens	Microarray	Functional MTI (Weak)	18185580
MIRT017417	hsa-miR-335-5p	Homo sapiens	POMC	5443	Homo sapiens	Microarray	Functional MTI (Weak)	18185580
MIRT017418	hsa-miR-335-5p	Homo sapiens	POLK	51426	Homo sapiens	Microarray	Functional MTI (Weak)	18185580
MIRT017419	hsa-miR-335-5p	Homo sapiens	MEPE	56955	Homo sapiens	Microarray	Functional MTI (Weak)	18185580
MIRT017420	hsa-miR-335-5p	Homo sapiens	BPY2C	442868	Homo sapiens	Microarray	Functional MTI (Weak)	18185580
MIRT017421	hsa-miR-335-5p	Homo sapiens	THBS3	7059	Homo sapiens	Microarray	Functional MTI (Weak)	18185580
MIRT017422	hsa-miR-335-5p	Homo sapiens	LOXL1	4016	Homo sapiens	Microarray	Functional MTI (Weak)	18185580
MIRT017423	hsa-miR-335-5p	Homo sapiens	RNU4-8P	6070	Homo sapiens	Microarray	Functional MTI (Weak)	18185580
MIRT017424	hsa-miR-335-5p	Homo sapiens	DNAL4	10126	Homo sapiens	Microarray	Functional MTI (Weak)	18185580
MIRT017425	hsa-miR-335-5p	Homo sapiens	CYP3A5	1577	Homo sapiens	Microarray	Functional MTI (Weak)	18185580
MIRT017426	hsa-miR-335-5p	Homo sapiens	CCL26	10344	Homo sapiens	Microarray	Functional MTI (Weak)	18185580
MIRT017427	hsa-miR-335-5p	Homo sapiens	REPS2	9185	Homo sapiens	Microarray	Functional MTI (Weak)	18185580
MIRT017428	hsa-miR-335-5p	Homo sapiens	SMG1	23049	Homo sapiens	Microarray	Functional MTI (Weak)	18185580
MIRT017429	hsa-miR-335-5p	Homo sapiens	MBNL2	10150	Homo sapiens	Microarray	Functional MTI (Weak)	18185580
MIRT017430	hsa-miR-335-5p	Homo sapiens	CMTM1	113540	Homo sapiens	Microarray	Functional MTI (Weak)	18185580
MIRT017431	hsa-miR-335-5p	Homo sapiens	CELSR3	1951	Homo sapiens	Microarray	Functional MTI (Weak)	18185580
MIRT017432	hsa-miR-335-5p	Homo sapiens	FLYWCH1	84256	Homo sapiens	Microarray	Functional MTI (Weak)	18185580
MIRT017433	hsa-miR-335-5p	Homo sapiens	TIGD3	220359	Homo sapiens	Microarray	Functional MTI (Weak)	18185580
MIRT017434	hsa-miR-335-5p	Homo sapiens	XKR4	114786	Homo sapiens	Microarray	Functional MTI (Weak)	18185580
MIRT017435	hsa-miR-335-5p	Homo sapiens	TMEM217	221468	Homo sapiens	Microarray	Functional MTI (Weak)	18185580
MIRT017436	hsa-miR-335-5p	Homo sapiens	KIAA1407	57577	Homo sapiens	Microarray	Functional MTI (Weak)	18185580
MIRT017437	hsa-miR-335-5p	Homo sapiens	FAM149A	25854	Homo sapiens	Microarray	Functional MTI (Weak)	18185580
MIRT017438	hsa-miR-335-5p	Homo sapiens	UBD	10537	Homo sapiens	Microarray	Functional MTI (Weak)	18185580
MIRT017439	hsa-miR-335-5p	Homo sapiens	COPG1	22820	Homo sapiens	Microarray	Functional MTI (Weak)	18185580
MIRT017440	hsa-miR-335-5p	Homo sapiens	BPIFA1	51297	Homo sapiens	Microarray	Functional MTI (Weak)	18185580
MIRT017441	hsa-miR-335-5p	Homo sapiens	WFDC11	259239	Homo sapiens	Microarray	Functional MTI (Weak)	18185580
MIRT017442	hsa-miR-335-5p	Homo sapiens	KRTAP3-3	85293	Homo sapiens	Microarray	Functional MTI (Weak)	18185580
MIRT017443	hsa-miR-335-5p	Homo sapiens	NRIP2	83714	Homo sapiens	Microarray	Functional MTI (Weak)	18185580
MIRT017444	hsa-miR-335-5p	Homo sapiens	C17orf66	256957	Homo sapiens	Microarray	Functional MTI (Weak)	18185580
MIRT017445	hsa-miR-335-5p	Homo sapiens	SNCG	6623	Homo sapiens	Microarray	Functional MTI (Weak)	18185580
MIRT017446	hsa-miR-335-5p	Homo sapiens	PRG3	10394	Homo sapiens	Microarray	Functional MTI (Weak)	18185580
MIRT017447	hsa-miR-335-5p	Homo sapiens	CNIH3	149111	Homo sapiens	Microarray	Functional MTI (Weak)	18185580
MIRT017448	hsa-miR-335-5p	Homo sapiens	MUC3A	4584	Homo sapiens	Microarray	Functional MTI (Weak)	18185580
MIRT017449	hsa-miR-335-5p	Homo sapiens	ZC3H11A	9877	Homo sapiens	Microarray	Functional MTI (Weak)	18185580
MIRT017450	hsa-miR-335-5p	Homo sapiens	DEFB123	245936	Homo sapiens	Microarray	Functional MTI (Weak)	18185580
MIRT017451	hsa-miR-335-5p	Homo sapiens	CDH3	1001	Homo sapiens	Microarray	Functional MTI (Weak)	18185580
MIRT017452	hsa-miR-335-5p	Homo sapiens	GPIHBP1	338328	Homo sapiens	Microarray	Functional MTI (Weak)	18185580
MIRT017453	hsa-miR-335-5p	Homo sapiens	HTRA4	203100	Homo sapiens	Microarray	Functional MTI (Weak)	18185580
MIRT017454	hsa-miR-335-5p	Homo sapiens	CRHR2	1395	Homo sapiens	Microarray	Functional MTI (Weak)	18185580
MIRT017455	hsa-miR-335-5p	Homo sapiens	GPRIN2	9721	Homo sapiens	Microarray	Functional MTI (Weak)	18185580
MIRT017456	hsa-miR-335-5p	Homo sapiens	KRT4	3851	Homo sapiens	Microarray	Functional MTI (Weak)	18185580
MIRT017457	hsa-miR-335-5p	Homo sapiens	FUT9	10690	Homo sapiens	Microarray	Functional MTI (Weak)	18185580
MIRT017458	hsa-miR-335-5p	Homo sapiens	SERPINB1	1992	Homo sapiens	Microarray	Functional MTI (Weak)	18185580
MIRT017459	hsa-miR-335-5p	Homo sapiens	FZD1	8321	Homo sapiens	Microarray	Functional MTI (Weak)	18185580
MIRT017460	hsa-miR-335-5p	Homo sapiens	TCEA3	6920	Homo sapiens	Microarray	Functional MTI (Weak)	18185580
MIRT017461	hsa-miR-335-5p	Homo sapiens	AGBL2	79841	Homo sapiens	Microarray	Functional MTI (Weak)	18185580
MIRT017462	hsa-miR-335-5p	Homo sapiens	FLT3	2322	Homo sapiens	Microarray	Functional MTI (Weak)	18185580
MIRT017463	hsa-miR-335-5p	Homo sapiens	SCGB1D1	10648	Homo sapiens	Microarray	Functional MTI (Weak)	18185580
MIRT017464	hsa-miR-335-5p	Homo sapiens	LY6H	4062	Homo sapiens	Microarray	Functional MTI (Weak)	18185580
MIRT017465	hsa-miR-335-5p	Homo sapiens	CHRDL2	25884	Homo sapiens	Microarray	Functional MTI (Weak)	18185580
MIRT017466	hsa-miR-335-5p	Homo sapiens	CYP4F22	126410	Homo sapiens	Microarray	Functional MTI (Weak)	18185580
MIRT017467	hsa-miR-335-5p	Homo sapiens	KLF8	11279	Homo sapiens	Microarray	Functional MTI (Weak)	18185580
MIRT017468	hsa-miR-335-5p	Homo sapiens	CLIC2	1193	Homo sapiens	Microarray	Functional MTI (Weak)	18185580
MIRT017469	hsa-miR-335-5p	Homo sapiens	ZSCAN23	222696	Homo sapiens	Microarray	Functional MTI (Weak)	18185580
MIRT017470	hsa-miR-335-5p	Homo sapiens	SLCO4A1	28231	Homo sapiens	Microarray	Functional MTI (Weak)	18185580
MIRT017471	hsa-miR-335-5p	Homo sapiens	TTC23L	153657	Homo sapiens	Microarray	Functional MTI (Weak)	18185580
MIRT017472	hsa-miR-335-5p	Homo sapiens	ABCC3	8714	Homo sapiens	Microarray	Functional MTI (Weak)	18185580
MIRT017473	hsa-miR-335-5p	Homo sapiens	SLC16A6	9120	Homo sapiens	Microarray	Functional MTI (Weak)	18185580
MIRT017474	hsa-miR-335-5p	Homo sapiens	SPSB1	80176	Homo sapiens	Microarray	Functional MTI (Weak)	18185580
MIRT017475	hsa-miR-335-5p	Homo sapiens	OR10D1P	26541	Homo sapiens	Microarray	Functional MTI (Weak)	18185580
MIRT017476	hsa-miR-335-5p	Homo sapiens	HFM1	164045	Homo sapiens	Microarray	Functional MTI (Weak)	18185580
MIRT017477	hsa-miR-335-5p	Homo sapiens	DRD5	1816	Homo sapiens	Microarray	Functional MTI (Weak)	18185580
MIRT017478	hsa-miR-335-5p	Homo sapiens	OVGP1	5016	Homo sapiens	Microarray	Functional MTI (Weak)	18185580
MIRT017479	hsa-miR-335-5p	Homo sapiens	PRR15L	79170	Homo sapiens	Microarray	Functional MTI (Weak)	18185580
MIRT017480	hsa-miR-335-5p	Homo sapiens	THEMIS2	9473	Homo sapiens	Microarray	Functional MTI (Weak)	18185580
MIRT017481	hsa-miR-335-5p	Homo sapiens	LURAP1L	286343	Homo sapiens	Microarray	Functional MTI (Weak)	18185580
MIRT017482	hsa-miR-335-5p	Homo sapiens	DYDC1	143241	Homo sapiens	Microarray	Functional MTI (Weak)	18185580
MIRT017483	hsa-miR-335-5p	Homo sapiens	C11orf54	28970	Homo sapiens	Microarray	Functional MTI (Weak)	18185580
MIRT017484	hsa-miR-335-5p	Homo sapiens	SYNPR	132204	Homo sapiens	Microarray	Functional MTI (Weak)	18185580
MIRT017485	hsa-miR-335-5p	Homo sapiens	ARHGAP21	57584	Homo sapiens	Microarray	Functional MTI (Weak)	18185580
MIRT017486	hsa-miR-335-5p	Homo sapiens	SPPL2C	162540	Homo sapiens	Microarray	Functional MTI (Weak)	18185580
MIRT017487	hsa-miR-335-5p	Homo sapiens	C1QA	712	Homo sapiens	Microarray	Functional MTI (Weak)	18185580
MIRT017488	hsa-miR-335-5p	Homo sapiens	CXCR1	3577	Homo sapiens	Microarray	Functional MTI (Weak)	18185580
MIRT017489	hsa-miR-335-5p	Homo sapiens	GAGE12D	100132399	Homo sapiens	Microarray	Functional MTI (Weak)	18185580
MIRT017490	hsa-miR-335-5p	Homo sapiens	SEMA4B	10509	Homo sapiens	Microarray	Functional MTI (Weak)	18185580
MIRT017491	hsa-miR-335-5p	Homo sapiens	DNAAF3	352909	Homo sapiens	Microarray	Functional MTI (Weak)	18185580
MIRT017492	hsa-miR-335-5p	Homo sapiens	BCL6	604	Homo sapiens	Microarray	Functional MTI (Weak)	18185580
MIRT017493	hsa-miR-335-5p	Homo sapiens	APBB1	322	Homo sapiens	Microarray	Functional MTI (Weak)	18185580
MIRT017494	hsa-miR-335-5p	Homo sapiens	ANKH	56172	Homo sapiens	Microarray	Functional MTI (Weak)	18185580
MIRT017495	hsa-miR-335-5p	Homo sapiens	ATP6V0A1	535	Homo sapiens	Microarray	Functional MTI (Weak)	18185580
MIRT017496	hsa-miR-335-5p	Homo sapiens	FUT11	170384	Homo sapiens	Microarray	Functional MTI (Weak)	18185580
MIRT017497	hsa-miR-335-5p	Homo sapiens	C7orf33	202865	Homo sapiens	Microarray	Functional MTI (Weak)	18185580
MIRT017498	hsa-miR-335-5p	Homo sapiens	PLXND1	23129	Homo sapiens	Microarray	Functional MTI (Weak)	18185580
MIRT017499	hsa-miR-335-5p	Homo sapiens	C19orf18	147685	Homo sapiens	Microarray	Functional MTI (Weak)	18185580
MIRT017500	hsa-miR-335-5p	Homo sapiens	HRH4	59340	Homo sapiens	Microarray	Functional MTI (Weak)	18185580
MIRT017501	hsa-miR-335-5p	Homo sapiens	ZNF451	26036	Homo sapiens	Microarray	Functional MTI (Weak)	18185580
MIRT017502	hsa-miR-335-5p	Homo sapiens	CCL25	6370	Homo sapiens	Microarray	Functional MTI (Weak)	18185580
MIRT017503	hsa-miR-335-5p	Homo sapiens	DEFA4	1669	Homo sapiens	Microarray	Functional MTI (Weak)	18185580
MIRT017504	hsa-miR-335-5p	Homo sapiens	CFHR2	3080	Homo sapiens	Microarray	Functional MTI (Weak)	18185580
MIRT017505	hsa-miR-335-5p	Homo sapiens	AP3D1	8943	Homo sapiens	Microarray	Functional MTI (Weak)	18185580
MIRT017506	hsa-miR-335-5p	Homo sapiens	GDF5	8200	Homo sapiens	Microarray	Functional MTI (Weak)	18185580
MIRT017507	hsa-miR-335-5p	Homo sapiens	ZFP3	124961	Homo sapiens	Microarray	Functional MTI (Weak)	18185580
MIRT017508	hsa-miR-335-5p	Homo sapiens	SLC12A3	6559	Homo sapiens	Microarray	Functional MTI (Weak)	18185580
MIRT017509	hsa-miR-335-5p	Homo sapiens	TFAP2B	7021	Homo sapiens	Microarray	Functional MTI (Weak)	18185580
MIRT017510	hsa-miR-335-5p	Homo sapiens	CLDN1	9076	Homo sapiens	Microarray	Functional MTI (Weak)	18185580
MIRT017511	hsa-miR-335-5p	Homo sapiens	ENTPD3	956	Homo sapiens	Microarray	Functional MTI (Weak)	18185580
MIRT017512	hsa-miR-335-5p	Homo sapiens	NPR3	4883	Homo sapiens	Microarray	Functional MTI (Weak)	18185580
MIRT017513	hsa-miR-335-5p	Homo sapiens	SP1	6667	Homo sapiens	Reporter assay;Western blot	Functional MTI	21618216
MIRT017514	hsa-miR-335-5p	Homo sapiens	KRT38	8687	Homo sapiens	Microarray	Functional MTI (Weak)	18185580
MIRT017515	hsa-miR-335-5p	Homo sapiens	EHF	26298	Homo sapiens	Microarray	Functional MTI (Weak)	18185580
MIRT017516	hsa-miR-335-5p	Homo sapiens	PSPN	5623	Homo sapiens	Microarray	Functional MTI (Weak)	18185580
MIRT017517	hsa-miR-335-5p	Homo sapiens	NTSR1	4923	Homo sapiens	Microarray	Functional MTI (Weak)	18185580
MIRT017518	hsa-miR-335-5p	Homo sapiens	DNALI1	7802	Homo sapiens	Microarray	Functional MTI (Weak)	18185580
MIRT017519	hsa-miR-335-5p	Homo sapiens	PLTP	5360	Homo sapiens	Microarray	Functional MTI (Weak)	18185580
MIRT017520	hsa-miR-335-5p	Homo sapiens	CRB2	286204	Homo sapiens	Microarray	Functional MTI (Weak)	18185580
MIRT017521	hsa-miR-335-5p	Homo sapiens	NDUFA4L2	56901	Homo sapiens	Microarray	Functional MTI (Weak)	18185580
MIRT017522	hsa-miR-335-5p	Homo sapiens	PDE2A	5138	Homo sapiens	Microarray	Functional MTI (Weak)	18185580
MIRT017523	hsa-miR-335-5p	Homo sapiens	PNLDC1	154197	Homo sapiens	Microarray	Functional MTI (Weak)	18185580
MIRT017524	hsa-miR-335-5p	Homo sapiens	LYST	1130	Homo sapiens	Microarray	Functional MTI (Weak)	18185580
MIRT017525	hsa-miR-335-5p	Homo sapiens	CAPS2	84698	Homo sapiens	Microarray	Functional MTI (Weak)	18185580
MIRT017526	hsa-miR-335-5p	Homo sapiens	SMYD1	150572	Homo sapiens	Microarray	Functional MTI (Weak)	18185580
MIRT017527	hsa-miR-335-5p	Homo sapiens	XRN1	54464	Homo sapiens	Microarray	Functional MTI (Weak)	18185580
MIRT017528	hsa-miR-335-5p	Homo sapiens	PDE6H	5149	Homo sapiens	Microarray	Functional MTI (Weak)	18185580
MIRT017529	hsa-miR-335-5p	Homo sapiens	ADAM32	203102	Homo sapiens	Microarray	Functional MTI (Weak)	18185580
MIRT017530	hsa-miR-335-5p	Homo sapiens	PTPRJ	5795	Homo sapiens	Microarray	Functional MTI (Weak)	18185580
MIRT017531	hsa-miR-335-5p	Homo sapiens	PRRG2	5639	Homo sapiens	Microarray	Functional MTI (Weak)	18185580
MIRT017532	hsa-miR-335-5p	Homo sapiens	RAB40A	142684	Homo sapiens	Microarray	Functional MTI (Weak)	18185580
MIRT017533	hsa-miR-335-5p	Homo sapiens	DEPDC5	9681	Homo sapiens	Microarray	Functional MTI (Weak)	18185580
MIRT017534	hsa-miR-335-5p	Homo sapiens	SLC35E2	9906	Homo sapiens	Microarray	Functional MTI (Weak)	18185580
MIRT017535	hsa-miR-335-5p	Homo sapiens	LZTS2	84445	Homo sapiens	Microarray	Functional MTI (Weak)	18185580
MIRT017536	hsa-miR-335-5p	Homo sapiens	RGCC	28984	Homo sapiens	Microarray	Functional MTI (Weak)	18185580
MIRT017537	hsa-miR-335-5p	Homo sapiens	NRP2	8828	Homo sapiens	Microarray	Functional MTI (Weak)	18185580
MIRT017538	hsa-miR-335-5p	Homo sapiens	CD99L2	83692	Homo sapiens	Microarray	Functional MTI (Weak)	18185580
MIRT017539	hsa-miR-335-5p	Homo sapiens	PC	5091	Homo sapiens	Microarray	Functional MTI (Weak)	18185580
MIRT017540	hsa-miR-335-5p	Homo sapiens	SPRY4	81848	Homo sapiens	Microarray	Functional MTI (Weak)	18185580
MIRT017541	hsa-miR-335-5p	Homo sapiens	C20orf85	128602	Homo sapiens	Microarray	Functional MTI (Weak)	18185580
MIRT017542	hsa-miR-335-5p	Homo sapiens	HBE1	3046	Homo sapiens	Microarray	Functional MTI (Weak)	18185580
MIRT017543	hsa-miR-335-5p	Homo sapiens	PODN	127435	Homo sapiens	Microarray	Functional MTI (Weak)	18185580
MIRT017544	hsa-miR-335-5p	Homo sapiens	VSTM2L	128434	Homo sapiens	Microarray	Functional MTI (Weak)	18185580
MIRT017545	hsa-miR-335-5p	Homo sapiens	OR8B3	390271	Homo sapiens	Microarray	Functional MTI (Weak)	18185580
MIRT017546	hsa-miR-335-5p	Homo sapiens	KLHL1	57626	Homo sapiens	Microarray	Functional MTI (Weak)	18185580
MIRT017547	hsa-miR-335-5p	Homo sapiens	ZNF157	7712	Homo sapiens	Microarray	Functional MTI (Weak)	18185580
MIRT017548	hsa-miR-335-5p	Homo sapiens	GPBAR1	151306	Homo sapiens	Microarray	Functional MTI (Weak)	18185580
MIRT017549	hsa-miR-335-5p	Homo sapiens	TK2	7084	Homo sapiens	Microarray	Functional MTI (Weak)	18185580
MIRT017550	hsa-miR-335-5p	Homo sapiens	ERCC6L2	375748	Homo sapiens	Microarray	Functional MTI (Weak)	18185580
MIRT017551	hsa-miR-335-5p	Homo sapiens	RBMY1F	159163	Homo sapiens	Microarray	Functional MTI (Weak)	18185580
MIRT017552	hsa-miR-335-5p	Homo sapiens	MUC4	4585	Homo sapiens	Microarray	Functional MTI (Weak)	18185580
MIRT017553	hsa-miR-335-5p	Homo sapiens	CORO2B	10391	Homo sapiens	Microarray	Functional MTI (Weak)	18185580
MIRT017554	hsa-miR-335-5p	Homo sapiens	RASA3	22821	Homo sapiens	Microarray	Functional MTI (Weak)	18185580
MIRT017555	hsa-miR-335-5p	Homo sapiens	FAM49A	81553	Homo sapiens	Microarray	Functional MTI (Weak)	18185580
MIRT017556	hsa-miR-335-5p	Homo sapiens	GNG8	94235	Homo sapiens	Microarray	Functional MTI (Weak)	18185580
MIRT017557	hsa-miR-335-5p	Homo sapiens	RERG	85004	Homo sapiens	Microarray	Functional MTI (Weak)	18185580
MIRT017558	hsa-miR-335-5p	Homo sapiens	DEFB132	400830	Homo sapiens	Microarray	Functional MTI (Weak)	18185580
MIRT017559	hsa-miR-335-5p	Homo sapiens	DNAJB14	79982	Homo sapiens	Microarray	Functional MTI (Weak)	18185580
MIRT017560	hsa-miR-335-5p	Homo sapiens	CHRM2	1129	Homo sapiens	Microarray	Functional MTI (Weak)	18185580
MIRT017561	hsa-miR-335-5p	Homo sapiens	FAM179A	165186	Homo sapiens	Microarray	Functional MTI (Weak)	18185580
MIRT017562	hsa-miR-335-5p	Homo sapiens	AMDHD1	144193	Homo sapiens	Microarray	Functional MTI (Weak)	18185580
MIRT017563	hsa-miR-335-5p	Homo sapiens	TAPT1	202018	Homo sapiens	Microarray	Functional MTI (Weak)	18185580
MIRT017564	hsa-miR-335-5p	Homo sapiens	BBS9	27241	Homo sapiens	Microarray	Functional MTI (Weak)	18185580
MIRT017565	hsa-miR-335-5p	Homo sapiens	RSPO1	284654	Homo sapiens	Microarray	Functional MTI (Weak)	18185580
MIRT017566	hsa-miR-335-5p	Homo sapiens	MAGED4B	81557	Homo sapiens	Microarray	Functional MTI (Weak)	18185580
MIRT017567	hsa-miR-335-5p	Homo sapiens	TBXAS1	6916	Homo sapiens	Microarray	Functional MTI (Weak)	18185580
MIRT017568	hsa-miR-335-5p	Homo sapiens	KDM6B	23135	Homo sapiens	Microarray	Functional MTI (Weak)	18185580
MIRT017569	hsa-miR-335-5p	Homo sapiens	NKAIN2	154215	Homo sapiens	Microarray	Functional MTI (Weak)	18185580
MIRT017570	hsa-miR-335-5p	Homo sapiens	MANSC1	54682	Homo sapiens	Microarray	Functional MTI (Weak)	18185580
MIRT017571	hsa-miR-335-5p	Homo sapiens	LTBP4	8425	Homo sapiens	Microarray	Functional MTI (Weak)	18185580
MIRT017572	hsa-miR-335-5p	Homo sapiens	MMAB	326625	Homo sapiens	Microarray	Functional MTI (Weak)	18185580
MIRT017573	hsa-miR-335-5p	Homo sapiens	ANO3	63982	Homo sapiens	Microarray	Functional MTI (Weak)	18185580
MIRT017574	hsa-miR-335-5p	Homo sapiens	CACNA2D4	93589	Homo sapiens	Microarray	Functional MTI (Weak)	18185580
MIRT017575	hsa-miR-335-5p	Homo sapiens	HRC	3270	Homo sapiens	Microarray	Functional MTI (Weak)	18185580
MIRT017576	hsa-miR-335-5p	Homo sapiens	LECT1	11061	Homo sapiens	Microarray	Functional MTI (Weak)	18185580
MIRT017577	hsa-miR-335-5p	Homo sapiens	CST4	1472	Homo sapiens	Microarray	Functional MTI (Weak)	18185580
MIRT017578	hsa-miR-335-5p	Homo sapiens	KRTAP9-8	83901	Homo sapiens	Microarray	Functional MTI (Weak)	18185580
MIRT017579	hsa-miR-335-5p	Homo sapiens	TEX13B	56156	Homo sapiens	Microarray	Functional MTI (Weak)	18185580
MIRT017580	hsa-miR-335-5p	Homo sapiens	RHOQ	23433	Homo sapiens	Microarray	Functional MTI (Weak)	18185580
MIRT017581	hsa-miR-335-5p	Homo sapiens	SESN2	83667	Homo sapiens	Microarray	Functional MTI (Weak)	18185580
MIRT017582	hsa-miR-335-5p	Homo sapiens	NAPSB	256236	Homo sapiens	Microarray	Functional MTI (Weak)	18185580
MIRT017583	hsa-miR-335-5p	Homo sapiens	BMP2	650	Homo sapiens	Microarray	Functional MTI (Weak)	18185580
MIRT017584	hsa-miR-335-5p	Homo sapiens	HHATL	57467	Homo sapiens	Microarray	Functional MTI (Weak)	18185580
MIRT017585	hsa-miR-335-5p	Homo sapiens	PTGDS	5730	Homo sapiens	Microarray	Functional MTI (Weak)	18185580
MIRT017586	hsa-miR-335-5p	Homo sapiens	CITED2	10370	Homo sapiens	Microarray	Functional MTI (Weak)	18185580
MIRT017587	hsa-miR-335-5p	Homo sapiens	NTN3	4917	Homo sapiens	Microarray	Functional MTI (Weak)	18185580
MIRT017588	hsa-miR-335-5p	Homo sapiens	PIK3C2A	5286	Homo sapiens	Microarray	Functional MTI (Weak)	18185580
MIRT017589	hsa-miR-335-5p	Homo sapiens	CCL24	6369	Homo sapiens	Microarray	Functional MTI (Weak)	18185580
MIRT017590	hsa-miR-335-5p	Homo sapiens	FAM196A	642938	Homo sapiens	Microarray	Functional MTI (Weak)	18185580
MIRT017591	hsa-miR-335-5p	Homo sapiens	CYSLTR1	10800	Homo sapiens	Microarray	Functional MTI (Weak)	18185580
MIRT017592	hsa-miR-335-5p	Homo sapiens	FAM124B	79843	Homo sapiens	Microarray	Functional MTI (Weak)	18185580
MIRT017593	hsa-miR-335-5p	Homo sapiens	SHOC2	8036	Homo sapiens	Microarray	Functional MTI (Weak)	18185580
MIRT017594	hsa-miR-335-5p	Homo sapiens	VN1R1	57191	Homo sapiens	Microarray	Functional MTI (Weak)	18185580
MIRT017595	hsa-miR-335-5p	Homo sapiens	FAM26E	254228	Homo sapiens	Microarray	Functional MTI (Weak)	18185580
MIRT017596	hsa-miR-335-5p	Homo sapiens	MXD1	4084	Homo sapiens	Microarray	Functional MTI (Weak)	18185580
MIRT017597	hsa-miR-335-5p	Homo sapiens	CRYGN	155051	Homo sapiens	Microarray	Functional MTI (Weak)	18185580
MIRT017598	hsa-miR-335-5p	Homo sapiens	CACNG4	27092	Homo sapiens	Microarray	Functional MTI (Weak)	18185580
MIRT017599	hsa-miR-335-5p	Homo sapiens	RPS6KA6	27330	Homo sapiens	Microarray	Functional MTI (Weak)	18185580
MIRT017600	hsa-miR-335-5p	Homo sapiens	TTLL1	25809	Homo sapiens	Microarray	Functional MTI (Weak)	18185580
MIRT017601	hsa-miR-335-5p	Homo sapiens	UGT2B4	7363	Homo sapiens	Microarray	Functional MTI (Weak)	18185580
MIRT017602	hsa-miR-335-5p	Homo sapiens	ITGA2	3673	Homo sapiens	Microarray	Functional MTI (Weak)	18185580
MIRT017603	hsa-miR-335-5p	Homo sapiens	FAAH2	158584	Homo sapiens	Microarray	Functional MTI (Weak)	18185580
MIRT017604	hsa-miR-335-5p	Homo sapiens	ITPR1	3708	Homo sapiens	Microarray	Functional MTI (Weak)	18185580
MIRT017605	hsa-miR-335-5p	Homo sapiens	ZCCHC6	79670	Homo sapiens	Microarray	Functional MTI (Weak)	18185580
MIRT017606	hsa-miR-335-5p	Homo sapiens	LOXL4	84171	Homo sapiens	Microarray	Functional MTI (Weak)	18185580
MIRT017607	hsa-miR-335-5p	Homo sapiens	RBM47	54502	Homo sapiens	Microarray	Functional MTI (Weak)	18185580
MIRT017608	hsa-miR-335-5p	Homo sapiens	HOOK1	51361	Homo sapiens	Microarray	Functional MTI (Weak)	18185580
MIRT017609	hsa-miR-335-5p	Homo sapiens	SPACA3	124912	Homo sapiens	Microarray	Functional MTI (Weak)	18185580
MIRT017610	hsa-miR-335-5p	Homo sapiens	DKK4	27121	Homo sapiens	Microarray	Functional MTI (Weak)	18185580
MIRT017611	hsa-miR-335-5p	Homo sapiens	REN	5972	Homo sapiens	Microarray	Functional MTI (Weak)	18185580
MIRT017612	hsa-miR-335-5p	Homo sapiens	MCPH1	79648	Homo sapiens	Microarray	Functional MTI (Weak)	18185580
MIRT017613	hsa-miR-335-5p	Homo sapiens	TERT	7015	Homo sapiens	Microarray	Functional MTI (Weak)	18185580
MIRT017614	hsa-miR-335-5p	Homo sapiens	ACSL3	2181	Homo sapiens	Microarray	Functional MTI (Weak)	18185580
MIRT017615	hsa-miR-335-5p	Homo sapiens	SLC17A7	57030	Homo sapiens	Microarray	Functional MTI (Weak)	18185580
MIRT017616	hsa-miR-335-5p	Homo sapiens	TBKBP1	9755	Homo sapiens	Microarray	Functional MTI (Weak)	18185580
MIRT017617	hsa-miR-335-5p	Homo sapiens	OTOR	56914	Homo sapiens	Microarray	Functional MTI (Weak)	18185580
MIRT017618	hsa-miR-335-5p	Homo sapiens	OR3A2	4995	Homo sapiens	Microarray	Functional MTI (Weak)	18185580
MIRT017619	hsa-miR-335-5p	Homo sapiens	TRIM73	375593	Homo sapiens	Microarray	Functional MTI (Weak)	18185580
MIRT017620	hsa-miR-335-5p	Homo sapiens	MSS51	118490	Homo sapiens	Microarray	Functional MTI (Weak)	18185580
MIRT017621	hsa-miR-335-5p	Homo sapiens	PON3	5446	Homo sapiens	Microarray	Functional MTI (Weak)	18185580
MIRT017622	hsa-miR-335-5p	Homo sapiens	FOXD3	27022	Homo sapiens	Microarray	Functional MTI (Weak)	18185580
MIRT017623	hsa-miR-335-5p	Homo sapiens	GEM	2669	Homo sapiens	Microarray	Functional MTI (Weak)	18185580
MIRT017624	hsa-miR-335-5p	Homo sapiens	C4orf17	84103	Homo sapiens	Microarray	Functional MTI (Weak)	18185580
MIRT017625	hsa-miR-335-5p	Homo sapiens	PPM1L	151742	Homo sapiens	Microarray	Functional MTI (Weak)	18185580
MIRT017626	hsa-miR-335-5p	Homo sapiens	SATB1	6304	Homo sapiens	Microarray	Functional MTI (Weak)	18185580
MIRT017627	hsa-miR-335-5p	Homo sapiens	SLC38A4	55089	Homo sapiens	Microarray	Functional MTI (Weak)	18185580
MIRT017628	hsa-miR-335-5p	Homo sapiens	LDLRAD4	753	Homo sapiens	Microarray	Functional MTI (Weak)	18185580
MIRT017629	hsa-miR-335-5p	Homo sapiens	FKBP8	23770	Homo sapiens	Microarray	Functional MTI (Weak)	18185580
MIRT017630	hsa-miR-335-5p	Homo sapiens	ETV1	2115	Homo sapiens	Microarray	Functional MTI (Weak)	18185580
MIRT017631	hsa-miR-335-5p	Homo sapiens	MARCKSL1	65108	Homo sapiens	Microarray	Functional MTI (Weak)	18185580
MIRT017632	hsa-miR-335-5p	Homo sapiens	NLRP13	126204	Homo sapiens	Microarray	Functional MTI (Weak)	18185580
MIRT017633	hsa-miR-335-5p	Homo sapiens	KCTD17	79734	Homo sapiens	Microarray	Functional MTI (Weak)	18185580
MIRT017634	hsa-miR-335-5p	Homo sapiens	KIAA1644	85352	Homo sapiens	Microarray	Functional MTI (Weak)	18185580
MIRT017635	hsa-miR-335-5p	Homo sapiens	SLC22A2	6582	Homo sapiens	Microarray	Functional MTI (Weak)	18185580
MIRT017636	hsa-miR-335-5p	Homo sapiens	JAK3	3718	Homo sapiens	Microarray	Functional MTI (Weak)	18185580
MIRT017637	hsa-miR-335-5p	Homo sapiens	KDM5A	5927	Homo sapiens	Microarray	Functional MTI (Weak)	18185580
MIRT017638	hsa-miR-335-5p	Homo sapiens	USO1	8615	Homo sapiens	Microarray	Functional MTI (Weak)	18185580
MIRT017639	hsa-miR-335-5p	Homo sapiens	CPEB2	132864	Homo sapiens	Microarray	Functional MTI (Weak)	18185580
MIRT017640	hsa-miR-335-5p	Homo sapiens	UBR2	23304	Homo sapiens	Microarray	Functional MTI (Weak)	18185580
MIRT017641	hsa-miR-335-5p	Homo sapiens	ATOH1	474	Homo sapiens	Microarray	Functional MTI (Weak)	18185580
MIRT017642	hsa-miR-335-5p	Homo sapiens	RORA	6095	Homo sapiens	Microarray	Functional MTI (Weak)	18185580
MIRT017643	hsa-miR-335-5p	Homo sapiens	MDGA2	161357	Homo sapiens	Microarray	Functional MTI (Weak)	18185580
MIRT017644	hsa-miR-335-5p	Homo sapiens	ZNF322P1	387328	Homo sapiens	Microarray	Functional MTI (Weak)	18185580
MIRT017645	hsa-miR-335-5p	Homo sapiens	IDH1	3417	Homo sapiens	Microarray	Functional MTI (Weak)	18185580
MIRT017646	hsa-miR-335-5p	Homo sapiens	RCVRN	5957	Homo sapiens	Microarray	Functional MTI (Weak)	18185580
MIRT017647	hsa-miR-335-5p	Homo sapiens	DIO1	1733	Homo sapiens	Microarray	Functional MTI (Weak)	18185580
MIRT017648	hsa-miR-335-5p	Homo sapiens	CDK18	5129	Homo sapiens	Microarray	Functional MTI (Weak)	18185580
MIRT017649	hsa-miR-335-5p	Homo sapiens	NXF3	56000	Homo sapiens	Microarray	Functional MTI (Weak)	18185580
MIRT017650	hsa-miR-335-5p	Homo sapiens	COLGALT2	23127	Homo sapiens	Microarray	Functional MTI (Weak)	18185580
MIRT017651	hsa-miR-335-5p	Homo sapiens	HSP90B1	7184	Homo sapiens	Microarray	Functional MTI (Weak)	18185580
MIRT017652	hsa-miR-335-5p	Homo sapiens	KIAA1328	57536	Homo sapiens	Microarray	Functional MTI (Weak)	18185580
MIRT017653	hsa-miR-335-5p	Homo sapiens	POLN	353497	Homo sapiens	Microarray	Functional MTI (Weak)	18185580
MIRT017654	hsa-miR-335-5p	Homo sapiens	RGS18	64407	Homo sapiens	Microarray	Functional MTI (Weak)	18185580
MIRT017655	hsa-miR-335-5p	Homo sapiens	ITGA10	8515	Homo sapiens	Microarray	Functional MTI (Weak)	18185580
MIRT017656	hsa-miR-335-5p	Homo sapiens	GLCCI1	113263	Homo sapiens	Microarray	Functional MTI (Weak)	18185580
MIRT017657	hsa-miR-335-5p	Homo sapiens	EIF4ENIF1	56478	Homo sapiens	Microarray	Functional MTI (Weak)	18185580
MIRT017658	hsa-miR-335-5p	Homo sapiens	CELF4	56853	Homo sapiens	Microarray	Functional MTI (Weak)	18185580
MIRT017659	hsa-miR-335-5p	Homo sapiens	NRP1	8829	Homo sapiens	Microarray	Functional MTI (Weak)	18185580
MIRT017660	hsa-miR-335-5p	Homo sapiens	IPMK	253430	Homo sapiens	Microarray	Functional MTI (Weak)	18185580
MIRT017661	hsa-miR-335-5p	Homo sapiens	VPREB3	29802	Homo sapiens	Microarray	Functional MTI (Weak)	18185580
MIRT017662	hsa-miR-335-5p	Homo sapiens	CUL7	9820	Homo sapiens	Microarray	Functional MTI (Weak)	18185580
MIRT017663	hsa-miR-335-5p	Homo sapiens	RFX3	5991	Homo sapiens	Microarray	Functional MTI (Weak)	18185580
MIRT017664	hsa-miR-335-5p	Homo sapiens	NXNL2	158046	Homo sapiens	Microarray	Functional MTI (Weak)	18185580
MIRT017665	hsa-miR-335-5p	Homo sapiens	AMELY	266	Homo sapiens	Microarray	Functional MTI (Weak)	18185580
MIRT017666	hsa-miR-335-5p	Homo sapiens	PCDHB15	56121	Homo sapiens	Microarray	Functional MTI (Weak)	18185580
MIRT017667	hsa-miR-335-5p	Homo sapiens	P2RX1	5023	Homo sapiens	Microarray	Functional MTI (Weak)	18185580
MIRT017668	hsa-miR-335-5p	Homo sapiens	MTA2	9219	Homo sapiens	Microarray	Functional MTI (Weak)	18185580
MIRT017669	hsa-miR-335-5p	Homo sapiens	BHLHE22	27319	Homo sapiens	Microarray	Functional MTI (Weak)	18185580
MIRT017670	hsa-miR-335-5p	Homo sapiens	ZNF280D	54816	Homo sapiens	Microarray	Functional MTI (Weak)	18185580
MIRT017671	hsa-miR-335-5p	Homo sapiens	C15orf32	145858	Homo sapiens	Microarray	Functional MTI (Weak)	18185580
MIRT017672	hsa-miR-335-5p	Homo sapiens	CHAC1	79094	Homo sapiens	Microarray	Functional MTI (Weak)	18185580
MIRT017673	hsa-miR-335-5p	Homo sapiens	LCK	3932	Homo sapiens	Microarray	Functional MTI (Weak)	18185580
MIRT017674	hsa-miR-335-5p	Homo sapiens	EPHA1	2041	Homo sapiens	Microarray	Functional MTI (Weak)	18185580
MIRT017675	hsa-miR-335-5p	Homo sapiens	OR8B2	26595	Homo sapiens	Microarray	Functional MTI (Weak)	18185580
MIRT017676	hsa-miR-335-5p	Homo sapiens	MATK	4145	Homo sapiens	Microarray	Functional MTI (Weak)	18185580
MIRT017677	hsa-miR-335-5p	Homo sapiens	TEX38	374973	Homo sapiens	Microarray	Functional MTI (Weak)	18185580
MIRT017678	hsa-miR-335-5p	Homo sapiens	MYO3B	140469	Homo sapiens	Microarray	Functional MTI (Weak)	18185580
MIRT017679	hsa-miR-335-5p	Homo sapiens	C10orf71	118461	Homo sapiens	Microarray	Functional MTI (Weak)	18185580
MIRT017680	hsa-miR-335-5p	Homo sapiens	PIM1	5292	Homo sapiens	Microarray	Functional MTI (Weak)	18185580
MIRT017681	hsa-miR-335-5p	Homo sapiens	PCDHGA10	56106	Homo sapiens	Microarray	Functional MTI (Weak)	18185580
MIRT017682	hsa-miR-335-5p	Homo sapiens	CABP5	56344	Homo sapiens	Microarray	Functional MTI (Weak)	18185580
MIRT017683	hsa-miR-335-5p	Homo sapiens	LRRC19	64922	Homo sapiens	Microarray	Functional MTI (Weak)	18185580
MIRT017684	hsa-miR-335-5p	Homo sapiens	CCDC146	57639	Homo sapiens	Microarray	Functional MTI (Weak)	18185580
MIRT017685	hsa-miR-335-5p	Homo sapiens	ANKRD44	91526	Homo sapiens	Microarray	Functional MTI (Weak)	18185580
MIRT017686	hsa-miR-335-5p	Homo sapiens	CLCN6	1185	Homo sapiens	Microarray	Functional MTI (Weak)	18185580
MIRT017687	hsa-miR-335-5p	Homo sapiens	KCNT2	343450	Homo sapiens	Microarray	Functional MTI (Weak)	18185580
MIRT017688	hsa-miR-335-5p	Homo sapiens	CCL14	6358	Homo sapiens	Microarray	Functional MTI (Weak)	18185580
MIRT017689	hsa-miR-335-5p	Homo sapiens	SNTB1	6641	Homo sapiens	Microarray	Functional MTI (Weak)	18185580
MIRT017690	hsa-miR-335-5p	Homo sapiens	C22orf43	51233	Homo sapiens	Microarray	Functional MTI (Weak)	18185580
MIRT017691	hsa-miR-335-5p	Homo sapiens	IL5	3567	Homo sapiens	Microarray	Functional MTI (Weak)	18185580
MIRT017692	hsa-miR-335-5p	Homo sapiens	NPEPL1	79716	Homo sapiens	Microarray	Functional MTI (Weak)	18185580
MIRT017693	hsa-miR-335-5p	Homo sapiens	TTC3	7267	Homo sapiens	Microarray	Functional MTI (Weak)	18185580
MIRT017694	hsa-miR-335-5p	Homo sapiens	CSGALNACT1	55790	Homo sapiens	Microarray	Functional MTI (Weak)	18185580
MIRT017695	hsa-miR-335-5p	Homo sapiens	ZNF558	148156	Homo sapiens	Microarray	Functional MTI (Weak)	18185580
MIRT017696	hsa-miR-335-5p	Homo sapiens	SYT1	6857	Homo sapiens	Microarray	Functional MTI (Weak)	18185580
MIRT017697	hsa-miR-335-5p	Homo sapiens	FNDC1	84624	Homo sapiens	Microarray	Functional MTI (Weak)	18185580
MIRT017698	hsa-miR-335-5p	Homo sapiens	ESRRB	2103	Homo sapiens	Microarray	Functional MTI (Weak)	18185580
MIRT017699	hsa-miR-335-5p	Homo sapiens	GRHL3	57822	Homo sapiens	Microarray	Functional MTI (Weak)	18185580
MIRT017700	hsa-miR-335-5p	Homo sapiens	VANGL2	57216	Homo sapiens	Microarray	Functional MTI (Weak)	18185580
MIRT017701	hsa-miR-335-5p	Homo sapiens	SRRM3	222183	Homo sapiens	Microarray	Functional MTI (Weak)	18185580
MIRT017702	hsa-miR-335-5p	Homo sapiens	C6orf58	352999	Homo sapiens	Microarray	Functional MTI (Weak)	18185580
MIRT017703	hsa-miR-335-5p	Homo sapiens	LRAT	9227	Homo sapiens	Microarray	Functional MTI (Weak)	18185580
MIRT017704	hsa-miR-335-5p	Homo sapiens	FFAR1	2864	Homo sapiens	Microarray	Functional MTI (Weak)	18185580
MIRT017705	hsa-miR-335-5p	Homo sapiens	LAIR2	3904	Homo sapiens	Microarray	Functional MTI (Weak)	18185580
MIRT017706	hsa-miR-335-5p	Homo sapiens	GUCA2B	2981	Homo sapiens	Microarray	Functional MTI (Weak)	18185580
MIRT017707	hsa-miR-335-5p	Homo sapiens	CDC42EP4	23580	Homo sapiens	Microarray	Functional MTI (Weak)	18185580
MIRT017708	hsa-miR-335-5p	Homo sapiens	PRKCG	5582	Homo sapiens	Microarray	Functional MTI (Weak)	18185580
MIRT017709	hsa-miR-335-5p	Homo sapiens	SLC46A2	57864	Homo sapiens	Microarray	Functional MTI (Weak)	18185580
MIRT017710	hsa-miR-335-5p	Homo sapiens	POPDC2	64091	Homo sapiens	Microarray	Functional MTI (Weak)	18185580
MIRT017711	hsa-miR-335-5p	Homo sapiens	RSPH9	221421	Homo sapiens	Microarray	Functional MTI (Weak)	18185580
MIRT017712	hsa-miR-335-5p	Homo sapiens	ZCCHC13	389874	Homo sapiens	Microarray	Functional MTI (Weak)	18185580
MIRT017713	hsa-miR-335-5p	Homo sapiens	BPY2	9083	Homo sapiens	Microarray	Functional MTI (Weak)	18185580
MIRT017714	hsa-miR-335-5p	Homo sapiens	HMOX1	3162	Homo sapiens	Microarray	Functional MTI (Weak)	18185580
MIRT017715	hsa-miR-335-5p	Homo sapiens	MIR769	768217	Homo sapiens	Microarray	Functional MTI (Weak)	18185580
MIRT017716	hsa-miR-335-5p	Homo sapiens	SEPT4	5414	Homo sapiens	Microarray	Functional MTI (Weak)	18185580
MIRT017717	hsa-miR-335-5p	Homo sapiens	SRPK3	26576	Homo sapiens	Microarray	Functional MTI (Weak)	18185580
MIRT017718	hsa-miR-335-5p	Homo sapiens	C8A	731	Homo sapiens	Microarray	Functional MTI (Weak)	18185580
MIRT017719	hsa-miR-335-5p	Homo sapiens	NFKBIA	4792	Homo sapiens	Microarray	Functional MTI (Weak)	18185580
MIRT017720	hsa-miR-335-5p	Homo sapiens	LRP1	4035	Homo sapiens	Microarray	Functional MTI (Weak)	18185580
MIRT017721	hsa-miR-335-5p	Homo sapiens	FIBCD1	84929	Homo sapiens	Microarray	Functional MTI (Weak)	18185580
MIRT017722	hsa-miR-335-5p	Homo sapiens	FOXA3	3171	Homo sapiens	Microarray	Functional MTI (Weak)	18185580
MIRT017723	hsa-miR-335-5p	Homo sapiens	ZNF598	90850	Homo sapiens	Microarray	Functional MTI (Weak)	18185580
MIRT017724	hsa-miR-335-5p	Homo sapiens	MUC5B	727897	Homo sapiens	Microarray	Functional MTI (Weak)	18185580
MIRT017725	hsa-miR-335-5p	Homo sapiens	HIC1	3090	Homo sapiens	Microarray	Functional MTI (Weak)	18185580
MIRT017726	hsa-miR-335-5p	Homo sapiens	C2	717	Homo sapiens	Microarray	Functional MTI (Weak)	18185580
MIRT017727	hsa-miR-335-5p	Homo sapiens	QPRT	23475	Homo sapiens	Microarray	Functional MTI (Weak)	18185580
MIRT017728	hsa-miR-335-5p	Homo sapiens	GLI1	2735	Homo sapiens	Microarray	Functional MTI (Weak)	18185580
MIRT017729	hsa-miR-335-5p	Homo sapiens	TMEM190	147744	Homo sapiens	Microarray	Functional MTI (Weak)	18185580
MIRT017730	hsa-miR-335-5p	Homo sapiens	GOLGA6C	653641	Homo sapiens	Microarray	Functional MTI (Weak)	18185580
MIRT017731	hsa-miR-335-5p	Homo sapiens	CLEC3B	7123	Homo sapiens	Microarray	Functional MTI (Weak)	18185580
MIRT017732	hsa-miR-335-5p	Homo sapiens	CD27	939	Homo sapiens	Microarray	Functional MTI (Weak)	18185580
MIRT017733	hsa-miR-335-5p	Homo sapiens	TMEM87B	84910	Homo sapiens	Microarray	Functional MTI (Weak)	18185580
MIRT017734	hsa-miR-335-5p	Homo sapiens	BATF2	116071	Homo sapiens	Microarray	Functional MTI (Weak)	18185580
MIRT017735	hsa-miR-335-5p	Homo sapiens	KIT	3815	Homo sapiens	Microarray	Functional MTI (Weak)	18185580
MIRT017736	hsa-miR-335-5p	Homo sapiens	KCNK7	10089	Homo sapiens	Microarray	Functional MTI (Weak)	18185580
MIRT017737	hsa-miR-335-5p	Homo sapiens	VASH1	22846	Homo sapiens	Microarray	Functional MTI (Weak)	18185580
MIRT017738	hsa-miR-335-5p	Homo sapiens	LYL1	4066	Homo sapiens	Microarray	Functional MTI (Weak)	18185580
MIRT017739	hsa-miR-335-5p	Homo sapiens	NLRP10	338322	Homo sapiens	Microarray	Functional MTI (Weak)	18185580
MIRT017740	hsa-miR-335-5p	Homo sapiens	ACSF2	80221	Homo sapiens	Microarray	Functional MTI (Weak)	18185580
MIRT017741	hsa-miR-335-5p	Homo sapiens	TEKT1	83659	Homo sapiens	Microarray	Functional MTI (Weak)	18185580
MIRT017742	hsa-miR-335-5p	Homo sapiens	TIMP3	7078	Homo sapiens	Microarray	Functional MTI (Weak)	18185580
MIRT017743	hsa-miR-335-5p	Homo sapiens	TBC1D28	254272	Homo sapiens	Microarray	Functional MTI (Weak)	18185580
MIRT017744	hsa-miR-335-5p	Homo sapiens	BTN2A1	11120	Homo sapiens	Microarray	Functional MTI (Weak)	18185580
MIRT017745	hsa-miR-335-5p	Homo sapiens	TLE4	7091	Homo sapiens	Microarray	Functional MTI (Weak)	18185580
MIRT017746	hsa-miR-335-5p	Homo sapiens	ZNF175	7728	Homo sapiens	Microarray	Functional MTI (Weak)	18185580
MIRT017747	hsa-miR-335-5p	Homo sapiens	DUOXA1	90527	Homo sapiens	Microarray	Functional MTI (Weak)	18185580
MIRT017748	hsa-miR-335-5p	Homo sapiens	GATS	352954	Homo sapiens	Microarray	Functional MTI (Weak)	18185580
MIRT017749	hsa-miR-335-5p	Homo sapiens	ARSI	340075	Homo sapiens	Microarray	Functional MTI (Weak)	18185580
MIRT017750	hsa-miR-335-5p	Homo sapiens	IL33	90865	Homo sapiens	Microarray	Functional MTI (Weak)	18185580
MIRT017751	hsa-miR-335-5p	Homo sapiens	BVES-AS1	154442	Homo sapiens	Microarray	Functional MTI (Weak)	18185580
MIRT017752	hsa-miR-335-5p	Homo sapiens	TRIM74	378108	Homo sapiens	Microarray	Functional MTI (Weak)	18185580
MIRT017753	hsa-miR-335-5p	Homo sapiens	PLA2G2E	30814	Homo sapiens	Microarray	Functional MTI (Weak)	18185580
MIRT017754	hsa-miR-335-5p	Homo sapiens	KLRF1	51348	Homo sapiens	Microarray	Functional MTI (Weak)	18185580
MIRT017755	hsa-miR-335-5p	Homo sapiens	PTGS2	5743	Homo sapiens	Microarray	Functional MTI (Weak)	18185580
MIRT017756	hsa-miR-335-5p	Homo sapiens	MMD	23531	Homo sapiens	Microarray	Functional MTI (Weak)	18185580
MIRT017757	hsa-miR-335-5p	Homo sapiens	GOLGA6A	342096	Homo sapiens	Microarray	Functional MTI (Weak)	18185580
MIRT017758	hsa-miR-335-5p	Homo sapiens	CNIH2	254263	Homo sapiens	Microarray	Functional MTI (Weak)	18185580
MIRT017759	hsa-miR-335-5p	Homo sapiens	C14orf37	145407	Homo sapiens	Microarray	Functional MTI (Weak)	18185580
MIRT017760	hsa-miR-335-5p	Homo sapiens	MUC1	4582	Homo sapiens	Microarray	Functional MTI (Weak)	18185580
MIRT017761	hsa-miR-335-5p	Homo sapiens	CDC42BPA	8476	Homo sapiens	Microarray	Functional MTI (Weak)	18185580
MIRT017762	hsa-miR-335-5p	Homo sapiens	BTBD9	114781	Homo sapiens	Microarray	Functional MTI (Weak)	18185580
MIRT017763	hsa-miR-335-5p	Homo sapiens	GABARAPL1	23710	Homo sapiens	Microarray	Functional MTI (Weak)	18185580
MIRT017764	hsa-miR-335-5p	Homo sapiens	FAM216B	144809	Homo sapiens	Microarray	Functional MTI (Weak)	18185580
MIRT017765	hsa-miR-335-5p	Homo sapiens	LPIN2	9663	Homo sapiens	Microarray	Functional MTI (Weak)	18185580
MIRT017766	hsa-miR-335-5p	Homo sapiens	SLC38A2	54407	Homo sapiens	Microarray	Functional MTI (Weak)	18185580
MIRT017767	hsa-miR-335-5p	Homo sapiens	SLC45A1	50651	Homo sapiens	Microarray	Functional MTI (Weak)	18185580
MIRT017768	hsa-miR-335-5p	Homo sapiens	TRIM3	10612	Homo sapiens	Microarray	Functional MTI (Weak)	18185580
MIRT017769	hsa-miR-335-5p	Homo sapiens	TSLP	85480	Homo sapiens	Microarray	Functional MTI (Weak)	18185580
MIRT017770	hsa-miR-335-5p	Homo sapiens	CD46	4179	Homo sapiens	Microarray	Functional MTI (Weak)	18185580
MIRT017771	hsa-miR-335-5p	Homo sapiens	MAGED2	10916	Homo sapiens	Microarray	Functional MTI (Weak)	18185580
MIRT017772	hsa-miR-335-5p	Homo sapiens	KIAA0226L	80183	Homo sapiens	Microarray	Functional MTI (Weak)	18185580
MIRT017773	hsa-miR-335-5p	Homo sapiens	NOS3	4846	Homo sapiens	Microarray	Functional MTI (Weak)	18185580
MIRT017774	hsa-miR-335-5p	Homo sapiens	SPATA18	132671	Homo sapiens	Microarray	Functional MTI (Weak)	18185580
MIRT017775	hsa-miR-335-5p	Homo sapiens	CTDSP2	10106	Homo sapiens	Microarray	Functional MTI (Weak)	18185580
MIRT017776	hsa-miR-335-5p	Homo sapiens	LGR6	59352	Homo sapiens	Microarray	Functional MTI (Weak)	18185580
MIRT017777	hsa-miR-335-5p	Homo sapiens	NPY4R	5540	Homo sapiens	Microarray	Functional MTI (Weak)	18185580
MIRT017778	hsa-miR-335-5p	Homo sapiens	MS4A6E	245802	Homo sapiens	Microarray	Functional MTI (Weak)	18185580
MIRT017779	hsa-miR-335-5p	Homo sapiens	TMEM163	81615	Homo sapiens	Microarray	Functional MTI (Weak)	18185580
MIRT017780	hsa-miR-335-5p	Homo sapiens	MARCH8	220972	Homo sapiens	Microarray	Functional MTI (Weak)	18185580
MIRT017781	hsa-miR-335-5p	Homo sapiens	B3GNT4	79369	Homo sapiens	Microarray	Functional MTI (Weak)	18185580
MIRT017782	hsa-miR-335-5p	Homo sapiens	MISP	126353	Homo sapiens	Microarray	Functional MTI (Weak)	18185580
MIRT017783	hsa-miR-335-5p	Homo sapiens	MLYCD	23417	Homo sapiens	Microarray	Functional MTI (Weak)	18185580
MIRT017784	hsa-miR-335-5p	Homo sapiens	BTBD2	55643	Homo sapiens	Microarray	Functional MTI (Weak)	18185580
MIRT017785	hsa-miR-335-5p	Homo sapiens	NR3C2	4306	Homo sapiens	Microarray	Functional MTI (Weak)	18185580
MIRT017786	hsa-miR-335-5p	Homo sapiens	LRRC70	100130733	Homo sapiens	Microarray	Functional MTI (Weak)	18185580
MIRT017787	hsa-miR-335-5p	Homo sapiens	ZDHHC15	158866	Homo sapiens	Microarray	Functional MTI (Weak)	18185580
MIRT017788	hsa-miR-335-5p	Homo sapiens	RASSF6	166824	Homo sapiens	Microarray	Functional MTI (Weak)	18185580
MIRT017789	hsa-miR-335-5p	Homo sapiens	C16orf11	146325	Homo sapiens	Microarray	Functional MTI (Weak)	18185580
MIRT017790	hsa-miR-335-5p	Homo sapiens	GDF9	2661	Homo sapiens	Microarray	Functional MTI (Weak)	18185580
MIRT017791	hsa-miR-335-5p	Homo sapiens	SLCO4C1	353189	Homo sapiens	Microarray	Functional MTI (Weak)	18185580
MIRT017792	hsa-miR-335-5p	Homo sapiens	TBX19	9095	Homo sapiens	Microarray	Functional MTI (Weak)	18185580
MIRT017793	hsa-miR-335-5p	Homo sapiens	HEATR5B	54497	Homo sapiens	Microarray	Functional MTI (Weak)	18185580
MIRT017794	hsa-miR-335-5p	Homo sapiens	CNFN	84518	Homo sapiens	Microarray	Functional MTI (Weak)	18185580
MIRT017795	hsa-miR-335-5p	Homo sapiens	INSIG2	51141	Homo sapiens	Microarray	Functional MTI (Weak)	18185580
MIRT017796	hsa-miR-335-5p	Homo sapiens	GLRA2	2742	Homo sapiens	Microarray	Functional MTI (Weak)	18185580
MIRT017797	hsa-miR-335-5p	Homo sapiens	TMCC3	57458	Homo sapiens	Microarray	Functional MTI (Weak)	18185580
MIRT017798	hsa-miR-335-5p	Homo sapiens	GBP2	2634	Homo sapiens	Microarray	Functional MTI (Weak)	18185580
MIRT017799	hsa-miR-335-5p	Homo sapiens	LILRB5	10990	Homo sapiens	Microarray	Functional MTI (Weak)	18185580
MIRT017800	hsa-miR-335-5p	Homo sapiens	TEX36	387718	Homo sapiens	Microarray	Functional MTI (Weak)	18185580
MIRT017801	hsa-miR-335-5p	Homo sapiens	RAB37	326624	Homo sapiens	Microarray	Functional MTI (Weak)	18185580
MIRT017802	hsa-miR-335-5p	Homo sapiens	FAM219B	57184	Homo sapiens	Microarray	Functional MTI (Weak)	18185580
MIRT017803	hsa-miR-335-5p	Homo sapiens	LIFR	3977	Homo sapiens	Microarray	Functional MTI (Weak)	18185580
MIRT017804	hsa-miR-335-5p	Homo sapiens	LZTFL1	54585	Homo sapiens	Microarray	Functional MTI (Weak)	18185580
MIRT017805	hsa-miR-335-5p	Homo sapiens	OR6B1	135946	Homo sapiens	Microarray	Functional MTI (Weak)	18185580
MIRT017806	hsa-miR-335-5p	Homo sapiens	CHST6	4166	Homo sapiens	Microarray	Functional MTI (Weak)	18185580
MIRT017807	hsa-miR-335-5p	Homo sapiens	LMCD1	29995	Homo sapiens	Microarray	Functional MTI (Weak)	18185580
MIRT017808	hsa-miR-335-5p	Homo sapiens	GABBR1	2550	Homo sapiens	Microarray	Functional MTI (Weak)	18185580
MIRT017809	hsa-miR-335-5p	Homo sapiens	FGD3	89846	Homo sapiens	Microarray	Functional MTI (Weak)	18185580
MIRT017810	hsa-miR-335-5p	Homo sapiens	NLRP1	22861	Homo sapiens	Microarray	Functional MTI (Weak)	18185580
MIRT017811	hsa-miR-335-5p	Homo sapiens	NKG7	4818	Homo sapiens	Microarray	Functional MTI (Weak)	18185580
MIRT017812	hsa-miR-335-5p	Homo sapiens	SMTNL1	219537	Homo sapiens	Microarray	Functional MTI (Weak)	18185580
MIRT017813	hsa-miR-335-5p	Homo sapiens	WDR19	57728	Homo sapiens	Microarray	Functional MTI (Weak)	18185580
MIRT017814	hsa-miR-335-5p	Homo sapiens	TRIM9	114088	Homo sapiens	Microarray	Functional MTI (Weak)	18185580
MIRT017815	hsa-miR-335-5p	Homo sapiens	KLF3	51274	Homo sapiens	Microarray	Functional MTI (Weak)	18185580
MIRT017816	hsa-miR-335-5p	Homo sapiens	ATXN1	6310	Homo sapiens	Microarray	Functional MTI (Weak)	18185580
MIRT017817	hsa-miR-335-5p	Homo sapiens	CYP2E1	1571	Homo sapiens	Microarray	Functional MTI (Weak)	18185580
MIRT017818	hsa-miR-335-5p	Homo sapiens	LRRC32	2615	Homo sapiens	Microarray	Functional MTI (Weak)	18185580
MIRT017819	hsa-miR-335-5p	Homo sapiens	MEIS3P2	257468	Homo sapiens	Microarray	Functional MTI (Weak)	18185580
MIRT017820	hsa-miR-335-5p	Homo sapiens	TMEM86B	255043	Homo sapiens	Microarray	Functional MTI (Weak)	18185580
MIRT017821	hsa-miR-335-5p	Homo sapiens	GJB2	2706	Homo sapiens	Microarray	Functional MTI (Weak)	18185580
MIRT017822	hsa-miR-335-5p	Homo sapiens	SLC52A1	55065	Homo sapiens	Microarray	Functional MTI (Weak)	18185580
MIRT017823	hsa-miR-335-5p	Homo sapiens	TULP3	7289	Homo sapiens	Microarray	Functional MTI (Weak)	18185580
MIRT017824	hsa-miR-335-5p	Homo sapiens	ALG12	79087	Homo sapiens	Microarray	Functional MTI (Weak)	18185580
MIRT017825	hsa-miR-335-5p	Homo sapiens	RBMY1HP	5944	Homo sapiens	Microarray	Functional MTI (Weak)	18185580
MIRT017826	hsa-miR-335-5p	Homo sapiens	KANK1	23189	Homo sapiens	Microarray	Functional MTI (Weak)	18185580
MIRT017827	hsa-miR-335-5p	Homo sapiens	ATP10B	23120	Homo sapiens	Microarray	Functional MTI (Weak)	18185580
MIRT017828	hsa-miR-335-5p	Homo sapiens	C8orf31	286122	Homo sapiens	Microarray	Functional MTI (Weak)	18185580
MIRT017829	hsa-miR-335-5p	Homo sapiens	PLAT	5327	Homo sapiens	Microarray	Functional MTI (Weak)	18185580
MIRT017830	hsa-miR-335-5p	Homo sapiens	ZMIZ1	57178	Homo sapiens	Microarray	Functional MTI (Weak)	18185580
MIRT017831	hsa-miR-335-5p	Homo sapiens	ZNF460	10794	Homo sapiens	Microarray	Functional MTI (Weak)	18185580
MIRT017832	hsa-miR-335-5p	Homo sapiens	ACSS3	79611	Homo sapiens	Microarray	Functional MTI (Weak)	18185580
MIRT017833	hsa-miR-335-5p	Homo sapiens	KLRC2	3822	Homo sapiens	Microarray	Functional MTI (Weak)	18185580
MIRT017834	hsa-miR-335-5p	Homo sapiens	CFTR	1080	Homo sapiens	Microarray	Functional MTI (Weak)	18185580
MIRT017835	hsa-miR-335-5p	Homo sapiens	SLC25A23	79085	Homo sapiens	Microarray	Functional MTI (Weak)	18185580
MIRT017836	hsa-miR-335-5p	Homo sapiens	HAPLN2	60484	Homo sapiens	Microarray	Functional MTI (Weak)	18185580
MIRT017837	hsa-miR-335-5p	Homo sapiens	CCL20	6364	Homo sapiens	Microarray	Functional MTI (Weak)	18185580
MIRT017838	hsa-miR-335-5p	Homo sapiens	DLG3	1741	Homo sapiens	Microarray	Functional MTI (Weak)	18185580
MIRT017839	hsa-miR-335-5p	Homo sapiens	TTYH2	94015	Homo sapiens	Microarray	Functional MTI (Weak)	18185580
MIRT017840	hsa-miR-335-5p	Homo sapiens	ABHD4	63874	Homo sapiens	Microarray	Functional MTI (Weak)	18185580
MIRT017841	hsa-miR-335-5p	Homo sapiens	TACR2	6865	Homo sapiens	Microarray	Functional MTI (Weak)	18185580
MIRT017842	hsa-miR-335-5p	Homo sapiens	SPAG9	9043	Homo sapiens	Microarray	Functional MTI (Weak)	18185580
MIRT017843	hsa-miR-335-5p	Homo sapiens	KRT5	3852	Homo sapiens	Microarray	Functional MTI (Weak)	18185580
MIRT017844	hsa-miR-335-5p	Homo sapiens	DLL1	28514	Homo sapiens	Microarray	Functional MTI (Weak)	18185580
MIRT017845	hsa-miR-335-5p	Homo sapiens	HIST1H3C	8352	Homo sapiens	Microarray	Functional MTI (Weak)	18185580
MIRT017846	hsa-miR-335-5p	Homo sapiens	TREH	11181	Homo sapiens	Microarray	Functional MTI (Weak)	18185580
MIRT017847	hsa-miR-335-5p	Homo sapiens	IFI16	3428	Homo sapiens	Microarray	Functional MTI (Weak)	18185580
MIRT017848	hsa-miR-335-5p	Homo sapiens	CEACAM8	1088	Homo sapiens	Microarray	Functional MTI (Weak)	18185580
MIRT017849	hsa-miR-335-5p	Homo sapiens	P2RX4	5025	Homo sapiens	Microarray	Functional MTI (Weak)	18185580
MIRT017850	hsa-miR-335-5p	Homo sapiens	SLC17A3	10786	Homo sapiens	Microarray	Functional MTI (Weak)	18185580
MIRT017851	hsa-miR-335-5p	Homo sapiens	GPR37L1	9283	Homo sapiens	Microarray	Functional MTI (Weak)	18185580
MIRT017852	hsa-miR-335-5p	Homo sapiens	TRIM16	10626	Homo sapiens	Microarray	Functional MTI (Weak)	18185580
MIRT017853	hsa-miR-335-5p	Homo sapiens	LMO3	55885	Homo sapiens	Microarray	Functional MTI (Weak)	18185580
MIRT017854	hsa-miR-335-5p	Homo sapiens	SNTN	132203	Homo sapiens	Microarray	Functional MTI (Weak)	18185580
MIRT017855	hsa-miR-335-5p	Homo sapiens	TP53INP1	94241	Homo sapiens	Microarray	Functional MTI (Weak)	18185580
MIRT017856	hsa-miR-335-5p	Homo sapiens	TSHR	7253	Homo sapiens	Microarray	Functional MTI (Weak)	18185580
MIRT017857	hsa-miR-335-5p	Homo sapiens	MXI1	4601	Homo sapiens	Microarray	Functional MTI (Weak)	18185580
MIRT017858	hsa-miR-335-5p	Homo sapiens	SOX9	6662	Homo sapiens	Microarray	Functional MTI (Weak)	18185580
MIRT017859	hsa-miR-335-5p	Homo sapiens	RFTN2	130132	Homo sapiens	Microarray	Functional MTI (Weak)	18185580
MIRT017860	hsa-miR-335-5p	Homo sapiens	SH2D3C	10044	Homo sapiens	Microarray	Functional MTI (Weak)	18185580
MIRT017861	hsa-miR-335-5p	Homo sapiens	RNU6-50P	26825	Homo sapiens	Microarray	Functional MTI (Weak)	18185580
MIRT017862	hsa-miR-335-5p	Homo sapiens	LIPG	9388	Homo sapiens	Microarray	Functional MTI (Weak)	18185580
MIRT017863	hsa-miR-335-5p	Homo sapiens	LILRB4	11006	Homo sapiens	Microarray	Functional MTI (Weak)	18185580
MIRT017864	hsa-miR-335-5p	Homo sapiens	C16orf71	146562	Homo sapiens	Microarray	Functional MTI (Weak)	18185580
MIRT017865	hsa-miR-335-5p	Homo sapiens	FMO6P	388714	Homo sapiens	Microarray	Functional MTI (Weak)	18185580
MIRT017866	hsa-miR-335-5p	Homo sapiens	ARHGEF37	389337	Homo sapiens	Microarray	Functional MTI (Weak)	18185580
MIRT017867	hsa-miR-335-5p	Homo sapiens	WBP1L	54838	Homo sapiens	Microarray	Functional MTI (Weak)	18185580
MIRT017868	hsa-miR-335-5p	Homo sapiens	POLD4	57804	Homo sapiens	Microarray	Functional MTI (Weak)	18185580
MIRT017869	hsa-miR-335-5p	Homo sapiens	RAPGEF2	9693	Homo sapiens	Microarray	Functional MTI (Weak)	18185580
MIRT017870	hsa-miR-335-5p	Homo sapiens	TTC18	118491	Homo sapiens	Microarray	Functional MTI (Weak)	18185580
MIRT017871	hsa-miR-335-5p	Homo sapiens	IGFBP4	3487	Homo sapiens	Microarray	Functional MTI (Weak)	18185580
MIRT017872	hsa-miR-335-5p	Homo sapiens	ST8SIA4	7903	Homo sapiens	Microarray	Functional MTI (Weak)	18185580
MIRT017873	hsa-miR-335-5p	Homo sapiens	ZNF804B	219578	Homo sapiens	Microarray	Functional MTI (Weak)	18185580
MIRT017874	hsa-miR-335-5p	Homo sapiens	DPYSL5	56896	Homo sapiens	Microarray	Functional MTI (Weak)	18185580
MIRT017875	hsa-miR-335-5p	Homo sapiens	ZPBP2	124626	Homo sapiens	Microarray	Functional MTI (Weak)	18185580
MIRT017876	hsa-miR-335-5p	Homo sapiens	TTLL5	23093	Homo sapiens	Microarray	Functional MTI (Weak)	18185580
MIRT017877	hsa-miR-335-5p	Homo sapiens	SLC27A1	376497	Homo sapiens	Microarray	Functional MTI (Weak)	18185580
MIRT017878	hsa-miR-335-5p	Homo sapiens	CLDN7	1366	Homo sapiens	Microarray	Functional MTI (Weak)	18185580
MIRT017879	hsa-miR-335-5p	Homo sapiens	PPP1R10	5514	Homo sapiens	Microarray	Functional MTI (Weak)	18185580
MIRT017880	hsa-miR-335-5p	Homo sapiens	TEKT4	150483	Homo sapiens	Microarray	Functional MTI (Weak)	18185580
MIRT017881	hsa-miR-335-5p	Homo sapiens	GAGE12H	729442	Homo sapiens	Microarray	Functional MTI (Weak)	18185580
MIRT017882	hsa-miR-335-5p	Homo sapiens	NEURL2	140825	Homo sapiens	Microarray	Functional MTI (Weak)	18185580
MIRT017883	hsa-miR-335-5p	Homo sapiens	TESPA1	9840	Homo sapiens	Microarray	Functional MTI (Weak)	18185580
MIRT017884	hsa-miR-335-5p	Homo sapiens	SEC16B	89866	Homo sapiens	Microarray	Functional MTI (Weak)	18185580
MIRT017885	hsa-miR-335-5p	Homo sapiens	RASSF5	83593	Homo sapiens	Microarray	Functional MTI (Weak)	18185580
MIRT017886	hsa-miR-335-5p	Homo sapiens	OPN1MW	2652	Homo sapiens	Microarray	Functional MTI (Weak)	18185580
MIRT017887	hsa-miR-335-5p	Homo sapiens	MAST1	22983	Homo sapiens	Microarray	Functional MTI (Weak)	18185580
MIRT017888	hsa-miR-335-5p	Homo sapiens	MXD4	10608	Homo sapiens	Microarray	Functional MTI (Weak)	18185580
MIRT017889	hsa-miR-335-5p	Homo sapiens	RP1L1	94137	Homo sapiens	Microarray	Functional MTI (Weak)	18185580
MIRT017890	hsa-miR-335-5p	Homo sapiens	TSPAN15	23555	Homo sapiens	Microarray	Functional MTI (Weak)	18185580
MIRT017891	hsa-miR-335-5p	Homo sapiens	TBC1D22B	55633	Homo sapiens	Microarray	Functional MTI (Weak)	18185580
MIRT017892	hsa-miR-335-5p	Homo sapiens	ZPBP	11055	Homo sapiens	Microarray	Functional MTI (Weak)	18185580
MIRT017893	hsa-miR-335-5p	Homo sapiens	C8orf4	56892	Homo sapiens	Microarray	Functional MTI (Weak)	18185580
MIRT017894	hsa-miR-335-5p	Homo sapiens	LINC00305	221241	Homo sapiens	Microarray	Functional MTI (Weak)	18185580
MIRT017895	hsa-miR-335-5p	Homo sapiens	RTP1	132112	Homo sapiens	Microarray	Functional MTI (Weak)	18185580
MIRT017896	hsa-miR-335-5p	Homo sapiens	TMOD4	29765	Homo sapiens	Microarray	Functional MTI (Weak)	18185580
MIRT017897	hsa-miR-335-5p	Homo sapiens	BTN2A3P	54718	Homo sapiens	Microarray	Functional MTI (Weak)	18185580
MIRT017898	hsa-miR-335-5p	Homo sapiens	DMXL1	1657	Homo sapiens	Microarray	Functional MTI (Weak)	18185580
MIRT017899	hsa-miR-335-5p	Homo sapiens	S100A5	6276	Homo sapiens	Microarray	Functional MTI (Weak)	18185580
MIRT017900	hsa-miR-335-5p	Homo sapiens	SPATA9	83890	Homo sapiens	Microarray	Functional MTI (Weak)	18185580
MIRT017901	hsa-miR-335-5p	Homo sapiens	BTLA	151888	Homo sapiens	Microarray	Functional MTI (Weak)	18185580
MIRT017902	hsa-miR-335-5p	Homo sapiens	ENDOU	8909	Homo sapiens	Microarray	Functional MTI (Weak)	18185580
MIRT017903	hsa-miR-335-5p	Homo sapiens	POR	5447	Homo sapiens	Microarray	Functional MTI (Weak)	18185580
MIRT017904	hsa-miR-335-5p	Homo sapiens	PPAP2B	8613	Homo sapiens	Microarray	Functional MTI (Weak)	18185580
MIRT017905	hsa-miR-335-5p	Homo sapiens	C6orf195	154386	Homo sapiens	Microarray	Functional MTI (Weak)	18185580
MIRT017906	hsa-miR-335-5p	Homo sapiens	STAT2	6773	Homo sapiens	Microarray	Functional MTI (Weak)	18185580
MIRT017907	hsa-miR-335-5p	Homo sapiens	DNAJB9	4189	Homo sapiens	Microarray	Functional MTI (Weak)	18185580
MIRT017908	hsa-miR-335-5p	Homo sapiens	WISP3	8838	Homo sapiens	Microarray	Functional MTI (Weak)	18185580
MIRT017909	hsa-miR-335-5p	Homo sapiens	SLC7A9	11136	Homo sapiens	Microarray	Functional MTI (Weak)	18185580
MIRT017910	hsa-miR-335-5p	Homo sapiens	ADAM2	2515	Homo sapiens	Microarray	Functional MTI (Weak)	18185580
MIRT017911	hsa-miR-335-5p	Homo sapiens	GCNT3	9245	Homo sapiens	Microarray	Functional MTI (Weak)	18185580
MIRT017912	hsa-miR-335-5p	Homo sapiens	PADI4	23569	Homo sapiens	Microarray	Functional MTI (Weak)	18185580
MIRT017913	hsa-miR-335-5p	Homo sapiens	DNAJC13	23317	Homo sapiens	Microarray	Functional MTI (Weak)	18185580
MIRT017914	hsa-miR-335-5p	Homo sapiens	C3orf36	80111	Homo sapiens	Microarray	Functional MTI (Weak)	18185580
MIRT017915	hsa-miR-335-5p	Homo sapiens	LRRC17	10234	Homo sapiens	Microarray	Functional MTI (Weak)	18185580
MIRT017916	hsa-miR-335-5p	Homo sapiens	YPEL3	83719	Homo sapiens	Microarray	Functional MTI (Weak)	18185580
MIRT017917	hsa-miR-335-5p	Homo sapiens	NEFH	4744	Homo sapiens	Microarray	Functional MTI (Weak)	18185580
MIRT017918	hsa-miR-335-5p	Homo sapiens	SCIN	85477	Homo sapiens	Microarray	Functional MTI (Weak)	18185580
MIRT017919	hsa-miR-335-5p	Homo sapiens	LINC00266-1	140849	Homo sapiens	Microarray	Functional MTI (Weak)	18185580
MIRT017920	hsa-miR-335-5p	Homo sapiens	CDX4	1046	Homo sapiens	Microarray	Functional MTI (Weak)	18185580
MIRT017921	hsa-miR-335-5p	Homo sapiens	SORCS3	22986	Homo sapiens	Microarray	Functional MTI (Weak)	18185580
MIRT017922	hsa-miR-335-5p	Homo sapiens	CLEC11A	6320	Homo sapiens	Microarray	Functional MTI (Weak)	18185580
MIRT017923	hsa-miR-335-5p	Homo sapiens	GATA1	2623	Homo sapiens	Microarray	Functional MTI (Weak)	18185580
MIRT017924	hsa-miR-335-5p	Homo sapiens	UGT2B17	7367	Homo sapiens	Microarray	Functional MTI (Weak)	18185580
MIRT017925	hsa-miR-335-5p	Homo sapiens	MYC	4609	Homo sapiens	Microarray	Functional MTI (Weak)	18185580
MIRT017925	hsa-miR-335-5p	Homo sapiens	MYC	4609	Homo sapiens	Western blot	Functional MTI	21618216
MIRT017926	hsa-miR-335-5p	Homo sapiens	LMTK2	22853	Homo sapiens	Microarray	Functional MTI (Weak)	18185580
MIRT017927	hsa-miR-335-5p	Homo sapiens	PNLIPRP3	119548	Homo sapiens	Microarray	Functional MTI (Weak)	18185580
MIRT017928	hsa-miR-335-5p	Homo sapiens	OLFML3	56944	Homo sapiens	Microarray	Functional MTI (Weak)	18185580
MIRT017929	hsa-miR-335-5p	Homo sapiens	PAQR8	85315	Homo sapiens	Microarray	Functional MTI (Weak)	18185580
MIRT017930	hsa-miR-335-5p	Homo sapiens	CLDN14	23562	Homo sapiens	Microarray	Functional MTI (Weak)	18185580
MIRT017931	hsa-miR-335-5p	Homo sapiens	KLK11	11012	Homo sapiens	Microarray	Functional MTI (Weak)	18185580
MIRT017932	hsa-miR-335-5p	Homo sapiens	UNC5C	8633	Homo sapiens	Microarray	Functional MTI (Weak)	18185580
MIRT017933	hsa-miR-335-5p	Homo sapiens	ZNF221	7638	Homo sapiens	Microarray	Functional MTI (Weak)	18185580
MIRT017934	hsa-miR-335-5p	Homo sapiens	PEBP4	157310	Homo sapiens	Microarray	Functional MTI (Weak)	18185580
MIRT017935	hsa-miR-335-5p	Homo sapiens	GSG1L	146395	Homo sapiens	Microarray	Functional MTI (Weak)	18185580
MIRT017936	hsa-miR-335-5p	Homo sapiens	WDR17	116966	Homo sapiens	Microarray	Functional MTI (Weak)	18185580
MIRT017937	hsa-miR-335-5p	Homo sapiens	AMY1C	278	Homo sapiens	Microarray	Functional MTI (Weak)	18185580
MIRT017938	hsa-miR-335-5p	Homo sapiens	CYP27C1	339761	Homo sapiens	Microarray	Functional MTI (Weak)	18185580
MIRT017939	hsa-miR-335-5p	Homo sapiens	HMCN1	83872	Homo sapiens	Microarray	Functional MTI (Weak)	18185580
MIRT017940	hsa-miR-335-5p	Homo sapiens	CREBRF	153222	Homo sapiens	Microarray	Functional MTI (Weak)	18185580
MIRT017941	hsa-miR-335-5p	Homo sapiens	RYR2	6262	Homo sapiens	Microarray	Functional MTI (Weak)	18185580
MIRT017942	hsa-miR-335-5p	Homo sapiens	ROBO4	54538	Homo sapiens	Microarray	Functional MTI (Weak)	18185580
MIRT017943	hsa-miR-335-5p	Homo sapiens	ESR2	2100	Homo sapiens	Microarray	Functional MTI (Weak)	18185580
MIRT017944	hsa-miR-335-5p	Homo sapiens	C16orf54	283897	Homo sapiens	Microarray	Functional MTI (Weak)	18185580
MIRT017945	hsa-miR-335-5p	Homo sapiens	SYP	6855	Homo sapiens	Microarray	Functional MTI (Weak)	18185580
MIRT017946	hsa-miR-335-5p	Homo sapiens	HAPLN1	1404	Homo sapiens	Microarray	Functional MTI (Weak)	18185580
MIRT017947	hsa-miR-335-5p	Homo sapiens	PLAC1L	219990	Homo sapiens	Microarray	Functional MTI (Weak)	18185580
MIRT017948	hsa-miR-335-5p	Homo sapiens	ERMP1	79956	Homo sapiens	Microarray	Functional MTI (Weak)	18185580
MIRT017949	hsa-miR-335-5p	Homo sapiens	CTRB1	1504	Homo sapiens	Microarray	Functional MTI (Weak)	18185580
MIRT017950	hsa-miR-335-5p	Homo sapiens	ZNF37A	7587	Homo sapiens	Microarray	Functional MTI (Weak)	18185580
MIRT017951	hsa-miR-335-5p	Homo sapiens	TMC6	11322	Homo sapiens	Microarray	Functional MTI (Weak)	18185580
MIRT017952	hsa-miR-335-5p	Homo sapiens	ACTRT2	140625	Homo sapiens	Microarray	Functional MTI (Weak)	18185580
MIRT017953	hsa-miR-335-5p	Homo sapiens	PABPC1L	80336	Homo sapiens	Microarray	Functional MTI (Weak)	18185580
MIRT017954	hsa-miR-335-5p	Homo sapiens	TMEM198	130612	Homo sapiens	Microarray	Functional MTI (Weak)	18185580
MIRT017955	hsa-miR-335-5p	Homo sapiens	ZNF711	7552	Homo sapiens	Microarray	Functional MTI (Weak)	18185580
MIRT017956	hsa-miR-335-5p	Homo sapiens	RGPD4	285190	Homo sapiens	Microarray	Functional MTI (Weak)	18185580
MIRT017957	hsa-miR-335-5p	Homo sapiens	TSNARE1	203062	Homo sapiens	Microarray	Functional MTI (Weak)	18185580
MIRT017958	hsa-miR-335-5p	Homo sapiens	FBN2	2201	Homo sapiens	Microarray	Functional MTI (Weak)	18185580
MIRT017959	hsa-miR-335-5p	Homo sapiens	DCP2	167227	Homo sapiens	Microarray	Functional MTI (Weak)	18185580
MIRT017960	hsa-miR-335-5p	Homo sapiens	PTPRE	5791	Homo sapiens	Microarray	Functional MTI (Weak)	18185580
MIRT017961	hsa-miR-335-5p	Homo sapiens	C20orf197	284756	Homo sapiens	Microarray	Functional MTI (Weak)	18185580
MIRT017962	hsa-miR-335-5p	Homo sapiens	MS4A2	2206	Homo sapiens	Microarray	Functional MTI (Weak)	18185580
MIRT017963	hsa-miR-335-5p	Homo sapiens	LYZL2	119180	Homo sapiens	Microarray	Functional MTI (Weak)	18185580
MIRT017964	hsa-miR-335-5p	Homo sapiens	SIGLEC8	27181	Homo sapiens	Microarray	Functional MTI (Weak)	18185580
MIRT017965	hsa-miR-335-5p	Homo sapiens	CATSPERB	79820	Homo sapiens	Microarray	Functional MTI (Weak)	18185580
MIRT017966	hsa-miR-335-5p	Homo sapiens	DSCR3	10311	Homo sapiens	Microarray	Functional MTI (Weak)	18185580
MIRT017967	hsa-miR-335-5p	Homo sapiens	KLHDC1	122773	Homo sapiens	Microarray	Functional MTI (Weak)	18185580
MIRT017968	hsa-miR-335-5p	Homo sapiens	FZD10	11211	Homo sapiens	Microarray	Functional MTI (Weak)	18185580
MIRT017969	hsa-miR-335-5p	Homo sapiens	ABCA4	24	Homo sapiens	Microarray	Functional MTI (Weak)	18185580
MIRT017970	hsa-miR-335-5p	Homo sapiens	GOLGA8A	23015	Homo sapiens	Microarray	Functional MTI (Weak)	18185580
MIRT017971	hsa-miR-335-5p	Homo sapiens	CYP2F1	1572	Homo sapiens	Microarray	Functional MTI (Weak)	18185580
MIRT017972	hsa-miR-335-5p	Homo sapiens	PBXIP1	57326	Homo sapiens	Microarray	Functional MTI (Weak)	18185580
MIRT017973	hsa-miR-335-5p	Homo sapiens	JAK2	3717	Homo sapiens	Microarray	Functional MTI (Weak)	18185580
MIRT017974	hsa-miR-335-5p	Homo sapiens	PPARA	5465	Homo sapiens	Microarray	Functional MTI (Weak)	18185580
MIRT017975	hsa-miR-335-5p	Homo sapiens	MGP	4256	Homo sapiens	Microarray	Functional MTI (Weak)	18185580
MIRT017976	hsa-miR-335-5p	Homo sapiens	TCEAL7	56849	Homo sapiens	Microarray	Functional MTI (Weak)	18185580
MIRT017977	hsa-miR-335-5p	Homo sapiens	RNU6-82P	100873781	Homo sapiens	Microarray	Functional MTI (Weak)	18185580
MIRT017978	hsa-miR-335-5p	Homo sapiens	EPHB4	2050	Homo sapiens	Microarray	Functional MTI (Weak)	18185580
MIRT017979	hsa-miR-335-5p	Homo sapiens	ST6GAL1	6480	Homo sapiens	Microarray	Functional MTI (Weak)	18185580
MIRT017980	hsa-miR-335-5p	Homo sapiens	IVL	3713	Homo sapiens	Microarray	Functional MTI (Weak)	18185580
MIRT017981	hsa-miR-335-5p	Homo sapiens	FNDC3B	64778	Homo sapiens	Microarray	Functional MTI (Weak)	18185580
MIRT017982	hsa-miR-335-5p	Homo sapiens	COL8A2	1296	Homo sapiens	Microarray	Functional MTI (Weak)	18185580
MIRT017983	hsa-miR-335-5p	Homo sapiens	KRTAP10-4	386672	Homo sapiens	Microarray	Functional MTI (Weak)	18185580
MIRT017984	hsa-miR-335-5p	Homo sapiens	XIRP1	165904	Homo sapiens	Microarray	Functional MTI (Weak)	18185580
MIRT017985	hsa-miR-335-5p	Homo sapiens	ZNF252P	286101	Homo sapiens	Microarray	Functional MTI (Weak)	18185580
MIRT017986	hsa-miR-335-5p	Homo sapiens	ZNF678	339500	Homo sapiens	Microarray	Functional MTI (Weak)	18185580
MIRT017987	hsa-miR-335-5p	Homo sapiens	IGLC3	3539	Homo sapiens	Microarray	Functional MTI (Weak)	18185580
MIRT017988	hsa-miR-335-5p	Homo sapiens	SMOC2	64094	Homo sapiens	Microarray	Functional MTI (Weak)	18185580
MIRT017989	hsa-miR-335-5p	Homo sapiens	DCAF4L2	138009	Homo sapiens	Microarray	Functional MTI (Weak)	18185580
MIRT017990	hsa-miR-335-5p	Homo sapiens	CPAMD8	27151	Homo sapiens	Microarray	Functional MTI (Weak)	18185580
MIRT017991	hsa-miR-335-5p	Homo sapiens	GPD2	2820	Homo sapiens	Microarray	Functional MTI (Weak)	18185580
MIRT017992	hsa-miR-335-5p	Homo sapiens	ABCG8	64241	Homo sapiens	Microarray	Functional MTI (Weak)	18185580
MIRT017993	hsa-miR-335-5p	Homo sapiens	GFPT1	2673	Homo sapiens	Microarray	Functional MTI (Weak)	18185580
MIRT017994	hsa-miR-335-5p	Homo sapiens	ZFP2	80108	Homo sapiens	Microarray	Functional MTI (Weak)	18185580
MIRT017995	hsa-miR-335-5p	Homo sapiens	ANKRD18CP	100287922	Homo sapiens	Microarray	Functional MTI (Weak)	18185580
MIRT017996	hsa-miR-335-5p	Homo sapiens	COL15A1	1306	Homo sapiens	Microarray	Functional MTI (Weak)	18185580
MIRT017997	hsa-miR-335-5p	Homo sapiens	CHRFAM7A	89832	Homo sapiens	Microarray	Functional MTI (Weak)	18185580
MIRT017998	hsa-miR-335-5p	Homo sapiens	TRIM63	84676	Homo sapiens	Microarray	Functional MTI (Weak)	18185580
MIRT017999	hsa-miR-335-5p	Homo sapiens	E2F5	1875	Homo sapiens	Microarray	Functional MTI (Weak)	18185580
MIRT018000	hsa-miR-335-5p	Homo sapiens	CYorf17	100533178	Homo sapiens	Microarray	Functional MTI (Weak)	18185580
MIRT018001	hsa-miR-335-5p	Homo sapiens	CTHRC1	115908	Homo sapiens	Microarray	Functional MTI (Weak)	18185580
MIRT018002	hsa-miR-335-5p	Homo sapiens	SHROOM4	57477	Homo sapiens	Microarray	Functional MTI (Weak)	18185580
MIRT018003	hsa-miR-335-5p	Homo sapiens	BPY2B	442867	Homo sapiens	Microarray	Functional MTI (Weak)	18185580
MIRT018004	hsa-miR-335-5p	Homo sapiens	CD276	80381	Homo sapiens	Microarray	Functional MTI (Weak)	18185580
MIRT018005	hsa-miR-335-5p	Homo sapiens	SEC24C	9632	Homo sapiens	Microarray	Functional MTI (Weak)	18185580
MIRT018006	hsa-miR-335-5p	Homo sapiens	RASGRP1	10125	Homo sapiens	Microarray	Functional MTI (Weak)	18185580
MIRT018007	hsa-miR-335-5p	Homo sapiens	TLX3	30012	Homo sapiens	Microarray	Functional MTI (Weak)	18185580
MIRT018008	hsa-miR-335-5p	Homo sapiens	OR5E1P	26343	Homo sapiens	Microarray	Functional MTI (Weak)	18185580
MIRT018009	hsa-miR-335-5p	Homo sapiens	TECPR1	25851	Homo sapiens	Microarray	Functional MTI (Weak)	18185580
MIRT018010	hsa-miR-335-5p	Homo sapiens	GAPDHS	26330	Homo sapiens	Microarray	Functional MTI (Weak)	18185580
MIRT018011	hsa-miR-335-5p	Homo sapiens	TGIF2LX	90316	Homo sapiens	Microarray	Functional MTI (Weak)	18185580
MIRT018012	hsa-miR-335-5p	Homo sapiens	LINGO3	645191	Homo sapiens	Microarray	Functional MTI (Weak)	18185580
MIRT018013	hsa-miR-335-5p	Homo sapiens	C9orf24	84688	Homo sapiens	Microarray	Functional MTI (Weak)	18185580
MIRT018014	hsa-miR-335-5p	Homo sapiens	MIB2	142678	Homo sapiens	Microarray	Functional MTI (Weak)	18185580
MIRT018015	hsa-miR-335-5p	Homo sapiens	OR51B5	282763	Homo sapiens	Microarray	Functional MTI (Weak)	18185580
MIRT018016	hsa-miR-335-5p	Homo sapiens	PPBP	5473	Homo sapiens	Microarray	Functional MTI (Weak)	18185580
MIRT018017	hsa-miR-335-5p	Homo sapiens	CCL19	6363	Homo sapiens	Microarray	Functional MTI (Weak)	18185580
MIRT018018	hsa-miR-335-5p	Homo sapiens	C1orf61	10485	Homo sapiens	Microarray	Functional MTI (Weak)	18185580
MIRT018019	hsa-miR-335-5p	Homo sapiens	CCR4	1233	Homo sapiens	Microarray	Functional MTI (Weak)	18185580
MIRT018020	hsa-miR-335-5p	Homo sapiens	BHLHE40	8553	Homo sapiens	Microarray	Functional MTI (Weak)	18185580
MIRT018021	hsa-miR-335-5p	Homo sapiens	C1orf106	55765	Homo sapiens	Microarray	Functional MTI (Weak)	18185580
MIRT018022	hsa-miR-335-5p	Homo sapiens	KLHL32	114792	Homo sapiens	Microarray	Functional MTI (Weak)	18185580
MIRT018023	hsa-miR-335-5p	Homo sapiens	ADAMTS16	170690	Homo sapiens	Microarray	Functional MTI (Weak)	18185580
MIRT018024	hsa-miR-335-5p	Homo sapiens	MIA2	117153	Homo sapiens	Microarray	Functional MTI (Weak)	18185580
MIRT018025	hsa-miR-335-5p	Homo sapiens	TNFAIP2	7127	Homo sapiens	Microarray	Functional MTI (Weak)	18185580
MIRT018026	hsa-miR-335-5p	Homo sapiens	DEFB106B	503841	Homo sapiens	Microarray	Functional MTI (Weak)	18185580
MIRT018027	hsa-miR-335-5p	Homo sapiens	LRCH2	57631	Homo sapiens	Microarray	Functional MTI (Weak)	18185580
MIRT018028	hsa-miR-335-5p	Homo sapiens	CACNA1B	774	Homo sapiens	Microarray	Functional MTI (Weak)	18185580
MIRT018029	hsa-miR-335-5p	Homo sapiens	EPOR	2057	Homo sapiens	Microarray	Functional MTI (Weak)	18185580
MIRT018030	hsa-miR-335-5p	Homo sapiens	ARHGEF2	9181	Homo sapiens	Microarray	Functional MTI (Weak)	18185580
MIRT018031	hsa-miR-335-5p	Homo sapiens	RBM46	166863	Homo sapiens	Microarray	Functional MTI (Weak)	18185580
MIRT018032	hsa-miR-335-5p	Homo sapiens	UCMA	221044	Homo sapiens	Microarray	Functional MTI (Weak)	18185580
MIRT018033	hsa-miR-335-5p	Homo sapiens	LIPA	3988	Homo sapiens	Microarray	Functional MTI (Weak)	18185580
MIRT018034	hsa-miR-335-5p	Homo sapiens	SPTBN5	51332	Homo sapiens	Microarray	Functional MTI (Weak)	18185580
MIRT018035	hsa-miR-335-5p	Homo sapiens	MGAT3	4248	Homo sapiens	Microarray	Functional MTI (Weak)	18185580
MIRT018036	hsa-miR-335-5p	Homo sapiens	SGK223	157285	Homo sapiens	Microarray	Functional MTI (Weak)	18185580
MIRT018037	hsa-miR-335-5p	Homo sapiens	LLGL2	3993	Homo sapiens	Microarray	Functional MTI (Weak)	18185580
MIRT018038	hsa-miR-335-5p	Homo sapiens	LYPD3	27076	Homo sapiens	Microarray	Functional MTI (Weak)	18185580
MIRT018039	hsa-miR-335-5p	Homo sapiens	SOSTDC1	25928	Homo sapiens	Microarray	Functional MTI (Weak)	18185580
MIRT018040	hsa-miR-335-5p	Homo sapiens	HSD3B2	3284	Homo sapiens	Microarray	Functional MTI (Weak)	18185580
MIRT018041	hsa-miR-335-5p	Homo sapiens	TRIM50	135892	Homo sapiens	Microarray	Functional MTI (Weak)	18185580
MIRT018042	hsa-miR-335-5p	Homo sapiens	ZNF862	643641	Homo sapiens	Microarray	Functional MTI (Weak)	18185580
MIRT018043	hsa-miR-335-5p	Homo sapiens	TJP3	27134	Homo sapiens	Microarray	Functional MTI (Weak)	18185580
MIRT018044	hsa-miR-335-5p	Homo sapiens	CUEDC1	404093	Homo sapiens	Microarray	Functional MTI (Weak)	18185580
MIRT018045	hsa-miR-335-5p	Homo sapiens	C14orf79	122616	Homo sapiens	Microarray	Functional MTI (Weak)	18185580
MIRT018046	hsa-miR-335-5p	Homo sapiens	NRK	203447	Homo sapiens	Microarray	Functional MTI (Weak)	18185580
MIRT018047	hsa-miR-335-5p	Homo sapiens	ASB3	51130	Homo sapiens	Microarray	Functional MTI (Weak)	18185580
MIRT018048	hsa-miR-335-5p	Homo sapiens	LGALS9C	654346	Homo sapiens	Microarray	Functional MTI (Weak)	18185580
MIRT018049	hsa-miR-335-5p	Homo sapiens	MN1	4330	Homo sapiens	Microarray	Functional MTI (Weak)	18185580
MIRT018050	hsa-miR-335-5p	Homo sapiens	DIP2C	22982	Homo sapiens	Microarray	Functional MTI (Weak)	18185580
MIRT018051	hsa-miR-335-5p	Homo sapiens	SSPN	8082	Homo sapiens	Microarray	Functional MTI (Weak)	18185580
MIRT018052	hsa-miR-335-5p	Homo sapiens	KLRC4	8302	Homo sapiens	Microarray	Functional MTI (Weak)	18185580
MIRT018053	hsa-miR-335-5p	Homo sapiens	CRYGS	1427	Homo sapiens	Microarray	Functional MTI (Weak)	18185580
MIRT018054	hsa-miR-335-5p	Homo sapiens	TRIM22	10346	Homo sapiens	Microarray	Functional MTI (Weak)	18185580
MIRT018055	hsa-miR-335-5p	Homo sapiens	LILRA1	11024	Homo sapiens	Microarray	Functional MTI (Weak)	18185580
MIRT018056	hsa-miR-335-5p	Homo sapiens	POU6F1	5463	Homo sapiens	Microarray	Functional MTI (Weak)	18185580
MIRT018057	hsa-miR-335-5p	Homo sapiens	LIF	3976	Homo sapiens	Microarray	Functional MTI (Weak)	18185580
MIRT018058	hsa-miR-335-5p	Homo sapiens	KCNE1L	23630	Homo sapiens	Microarray	Functional MTI (Weak)	18185580
MIRT018059	hsa-miR-335-5p	Homo sapiens	TAF1	6872	Homo sapiens	Microarray	Functional MTI (Weak)	18185580
MIRT018060	hsa-miR-335-5p	Homo sapiens	MED24	9862	Homo sapiens	Microarray	Functional MTI (Weak)	18185580
MIRT018061	hsa-miR-335-5p	Homo sapiens	SDF2L1	23753	Homo sapiens	Microarray	Functional MTI (Weak)	18185580
MIRT018062	hsa-miR-335-5p	Homo sapiens	NCAM2	4685	Homo sapiens	Microarray	Functional MTI (Weak)	18185580
MIRT018063	hsa-miR-335-5p	Homo sapiens	CAPN13	92291	Homo sapiens	Microarray	Functional MTI (Weak)	18185580
MIRT018064	hsa-miR-335-5p	Homo sapiens	KRTAP4-6	81871	Homo sapiens	Microarray	Functional MTI (Weak)	18185580
MIRT018065	hsa-miR-335-5p	Homo sapiens	PPL	5493	Homo sapiens	Microarray	Functional MTI (Weak)	18185580
MIRT018066	hsa-miR-335-5p	Homo sapiens	MAL2	114569	Homo sapiens	Microarray	Functional MTI (Weak)	18185580
MIRT018067	hsa-miR-335-5p	Homo sapiens	CRYBA1	1411	Homo sapiens	Microarray	Functional MTI (Weak)	18185580
MIRT018068	hsa-miR-335-5p	Homo sapiens	GSN	2934	Homo sapiens	Microarray	Functional MTI (Weak)	18185580
MIRT018069	hsa-miR-335-5p	Homo sapiens	RBMY1D	378949	Homo sapiens	Microarray	Functional MTI (Weak)	18185580
MIRT018070	hsa-miR-335-5p	Homo sapiens	LCNL1	401562	Homo sapiens	Microarray	Functional MTI (Weak)	18185580
MIRT018071	hsa-miR-335-5p	Homo sapiens	SNX32	254122	Homo sapiens	Microarray	Functional MTI (Weak)	18185580
MIRT018072	hsa-miR-335-5p	Homo sapiens	SCN3A	6328	Homo sapiens	Microarray	Functional MTI (Weak)	18185580
MIRT018073	hsa-miR-335-5p	Homo sapiens	MARCH11	441061	Homo sapiens	Microarray	Functional MTI (Weak)	18185580
MIRT018074	hsa-miR-335-5p	Homo sapiens	CCER1	196477	Homo sapiens	Microarray	Functional MTI (Weak)	18185580
MIRT018075	hsa-miR-335-5p	Homo sapiens	PRKG2	5593	Homo sapiens	Microarray	Functional MTI (Weak)	18185580
MIRT018076	hsa-miR-335-5p	Homo sapiens	RUNDC3B	154661	Homo sapiens	Microarray	Functional MTI (Weak)	18185580
MIRT018077	hsa-miR-335-5p	Homo sapiens	FKBP7	51661	Homo sapiens	Microarray	Functional MTI (Weak)	18185580
MIRT018078	hsa-miR-335-5p	Homo sapiens	MIR194-2	406970	Homo sapiens	Microarray	Functional MTI (Weak)	18185580
MIRT018079	hsa-miR-335-5p	Homo sapiens	PLXNA3	55558	Homo sapiens	Microarray	Functional MTI (Weak)	18185580
MIRT018080	hsa-miR-335-5p	Homo sapiens	RNASE2	6036	Homo sapiens	Microarray	Functional MTI (Weak)	18185580
MIRT018081	hsa-miR-335-5p	Homo sapiens	URB1	9875	Homo sapiens	Microarray	Functional MTI (Weak)	18185580
MIRT018082	hsa-miR-335-5p	Homo sapiens	SP4	6671	Homo sapiens	Microarray	Functional MTI (Weak)	18185580
MIRT018083	hsa-miR-335-5p	Homo sapiens	LHPP	64077	Homo sapiens	Microarray	Functional MTI (Weak)	18185580
MIRT018084	hsa-miR-335-5p	Homo sapiens	GPR37	2861	Homo sapiens	Microarray	Functional MTI (Weak)	18185580
MIRT018085	hsa-miR-335-5p	Homo sapiens	ATP6V0D2	245972	Homo sapiens	Microarray	Functional MTI (Weak)	18185580
MIRT018086	hsa-miR-335-5p	Homo sapiens	SPINK5	11005	Homo sapiens	Microarray	Functional MTI (Weak)	18185580
MIRT018087	hsa-miR-335-5p	Homo sapiens	PCBP3	54039	Homo sapiens	Microarray	Functional MTI (Weak)	18185580
MIRT018088	hsa-miR-335-5p	Homo sapiens	INSL5	10022	Homo sapiens	Microarray	Functional MTI (Weak)	18185580
MIRT018089	hsa-miR-335-5p	Homo sapiens	PITPNM2	57605	Homo sapiens	Microarray	Functional MTI (Weak)	18185580
MIRT018090	hsa-miR-335-5p	Homo sapiens	DEFB106A	245909	Homo sapiens	Microarray	Functional MTI (Weak)	18185580
MIRT018091	hsa-miR-335-5p	Homo sapiens	C14orf183	196913	Homo sapiens	Microarray	Functional MTI (Weak)	18185580
MIRT018092	hsa-miR-335-5p	Homo sapiens	OTOGL	283310	Homo sapiens	Microarray	Functional MTI (Weak)	18185580
MIRT018093	hsa-miR-335-5p	Homo sapiens	NFAT5	10725	Homo sapiens	Microarray	Functional MTI (Weak)	18185580
MIRT018094	hsa-miR-335-5p	Homo sapiens	TFAP4	7023	Homo sapiens	Microarray	Functional MTI (Weak)	18185580
MIRT018095	hsa-miR-335-5p	Homo sapiens	CCDC110	256309	Homo sapiens	Microarray	Functional MTI (Weak)	18185580
MIRT018096	hsa-miR-335-5p	Homo sapiens	ZFYVE28	57732	Homo sapiens	Microarray	Functional MTI (Weak)	18185580
MIRT018097	hsa-miR-335-5p	Homo sapiens	LCN1	3933	Homo sapiens	Microarray	Functional MTI (Weak)	18185580
MIRT018098	hsa-miR-335-5p	Homo sapiens	SOST	50964	Homo sapiens	Microarray	Functional MTI (Weak)	18185580
MIRT018099	hsa-miR-335-5p	Homo sapiens	MMP2	4313	Homo sapiens	Microarray	Functional MTI (Weak)	18185580
MIRT018100	hsa-miR-335-5p	Homo sapiens	BEX5	340542	Homo sapiens	Microarray	Functional MTI (Weak)	18185580
MIRT018101	hsa-miR-335-5p	Homo sapiens	TMEM8B	51754	Homo sapiens	Microarray	Functional MTI (Weak)	18185580
MIRT018102	hsa-miR-335-5p	Homo sapiens	SLC5A3	6526	Homo sapiens	Microarray	Functional MTI (Weak)	18185580
MIRT018103	hsa-miR-335-5p	Homo sapiens	CDKN1C	1028	Homo sapiens	Microarray	Functional MTI (Weak)	18185580
MIRT018104	hsa-miR-335-5p	Homo sapiens	LFNG	3955	Homo sapiens	Microarray	Functional MTI (Weak)	18185580
MIRT018105	hsa-miR-335-5p	Homo sapiens	PLEKHG3	26030	Homo sapiens	Microarray	Functional MTI (Weak)	18185580
MIRT018106	hsa-miR-335-5p	Homo sapiens	CCDC38	120935	Homo sapiens	Microarray	Functional MTI (Weak)	18185580
MIRT018107	hsa-miR-335-5p	Homo sapiens	LRRC36	55282	Homo sapiens	Microarray	Functional MTI (Weak)	18185580
MIRT018108	hsa-miR-335-5p	Homo sapiens	HCST	10870	Homo sapiens	Microarray	Functional MTI (Weak)	18185580
MIRT018109	hsa-miR-335-5p	Homo sapiens	TRERF1	55809	Homo sapiens	Microarray	Functional MTI (Weak)	18185580
MIRT018110	hsa-miR-335-5p	Homo sapiens	CD226	10666	Homo sapiens	Microarray	Functional MTI (Weak)	18185580
MIRT018111	hsa-miR-335-5p	Homo sapiens	DLX5	1749	Homo sapiens	Microarray	Functional MTI (Weak)	18185580
MIRT018112	hsa-miR-335-5p	Homo sapiens	OGDH	4967	Homo sapiens	Microarray	Functional MTI (Weak)	18185580
MIRT018113	hsa-miR-335-5p	Homo sapiens	PODXL2	50512	Homo sapiens	Microarray	Functional MTI (Weak)	18185580
MIRT018114	hsa-miR-335-5p	Homo sapiens	PDIA4	9601	Homo sapiens	Microarray	Functional MTI (Weak)	18185580
MIRT018115	hsa-miR-335-5p	Homo sapiens	SRRM2-AS1	100128788	Homo sapiens	Microarray	Functional MTI (Weak)	18185580
MIRT018116	hsa-miR-335-5p	Homo sapiens	LINC00862	554279	Homo sapiens	Microarray	Functional MTI (Weak)	18185580
MIRT018117	hsa-miR-335-5p	Homo sapiens	HECTD2	143279	Homo sapiens	Microarray	Functional MTI (Weak)	18185580
MIRT018118	hsa-miR-335-5p	Homo sapiens	SCAND2P	54581	Homo sapiens	Microarray	Functional MTI (Weak)	18185580
MIRT018119	hsa-miR-335-5p	Homo sapiens	BRCA1	672	Homo sapiens	Western blot	Functional MTI	21618216
MIRT018120	hsa-miR-335-5p	Homo sapiens	WBP1	23559	Homo sapiens	Microarray	Functional MTI (Weak)	18185580
MIRT018121	hsa-miR-335-5p	Homo sapiens	SPATA6L	55064	Homo sapiens	Microarray	Functional MTI (Weak)	18185580
MIRT018122	hsa-miR-335-5p	Homo sapiens	CD300C	10871	Homo sapiens	Microarray	Functional MTI (Weak)	18185580
MIRT018123	hsa-miR-335-5p	Homo sapiens	HGD	3081	Homo sapiens	Microarray	Functional MTI (Weak)	18185580
MIRT018124	hsa-miR-335-5p	Homo sapiens	PCDHGC3	5098	Homo sapiens	Microarray	Functional MTI (Weak)	18185580
MIRT018125	hsa-miR-335-5p	Homo sapiens	DNAJC5G	285126	Homo sapiens	Microarray	Functional MTI (Weak)	18185580
MIRT018126	hsa-miR-335-5p	Homo sapiens	LMOD1	25802	Homo sapiens	Microarray	Functional MTI (Weak)	18185580
MIRT018127	hsa-miR-335-5p	Homo sapiens	TAC4	255061	Homo sapiens	Microarray	Functional MTI (Weak)	18185580
MIRT018128	hsa-miR-335-5p	Homo sapiens	PROX1	5629	Homo sapiens	Microarray	Functional MTI (Weak)	18185580
MIRT018129	hsa-miR-335-5p	Homo sapiens	RECK	8434	Homo sapiens	Microarray	Functional MTI (Weak)	18185580
MIRT018130	hsa-miR-335-5p	Homo sapiens	OR1R1P	9596	Homo sapiens	Microarray	Functional MTI (Weak)	18185580
MIRT018131	hsa-miR-335-5p	Homo sapiens	ICAM1	3383	Homo sapiens	Microarray	Functional MTI (Weak)	18185580
MIRT018132	hsa-miR-335-5p	Homo sapiens	LSP1	4046	Homo sapiens	Microarray	Functional MTI (Weak)	18185580
MIRT018133	hsa-miR-335-5p	Homo sapiens	TMEM170B	100113407	Homo sapiens	Microarray	Functional MTI (Weak)	18185580
MIRT018134	hsa-miR-335-5p	Homo sapiens	STARD5	80765	Homo sapiens	Microarray	Functional MTI (Weak)	18185580
MIRT018135	hsa-miR-335-5p	Homo sapiens	IGLV3-10	28803	Homo sapiens	Microarray	Functional MTI (Weak)	18185580
MIRT018136	hsa-miR-335-5p	Homo sapiens	PDE8B	8622	Homo sapiens	Microarray	Functional MTI (Weak)	18185580
MIRT018137	hsa-miR-335-5p	Homo sapiens	DAGLA	747	Homo sapiens	Microarray	Functional MTI (Weak)	18185580
MIRT018138	hsa-miR-335-5p	Homo sapiens	RALGPS2	55103	Homo sapiens	Microarray	Functional MTI (Weak)	18185580
MIRT018139	hsa-miR-335-5p	Homo sapiens	JAKMIP2	9832	Homo sapiens	Microarray	Functional MTI (Weak)	18185580
MIRT018140	hsa-miR-335-5p	Homo sapiens	C17orf100	388327	Homo sapiens	Microarray	Functional MTI (Weak)	18185580
MIRT018141	hsa-miR-335-5p	Homo sapiens	RAPGEF4	11069	Homo sapiens	Microarray	Functional MTI (Weak)	18185580
MIRT018142	hsa-miR-335-5p	Homo sapiens	DDN	23109	Homo sapiens	Microarray	Functional MTI (Weak)	18185580
MIRT018143	hsa-miR-335-5p	Homo sapiens	TECTB	6975	Homo sapiens	Microarray	Functional MTI (Weak)	18185580
MIRT018144	hsa-miR-335-5p	Homo sapiens	HTRA3	94031	Homo sapiens	Microarray	Functional MTI (Weak)	18185580
MIRT018145	hsa-miR-335-5p	Homo sapiens	MMP17	4326	Homo sapiens	Microarray	Functional MTI (Weak)	18185580
MIRT018146	hsa-miR-335-5p	Homo sapiens	RPE65	6121	Homo sapiens	Microarray	Functional MTI (Weak)	18185580
MIRT018147	hsa-miR-335-5p	Homo sapiens	ARSA	410	Homo sapiens	Microarray	Functional MTI (Weak)	18185580
MIRT018148	hsa-miR-335-5p	Homo sapiens	IKBKB	3551	Homo sapiens	Microarray	Functional MTI (Weak)	18185580
MIRT018149	hsa-miR-335-5p	Homo sapiens	COL6A1	1291	Homo sapiens	Microarray	Functional MTI (Weak)	18185580
MIRT018150	hsa-miR-335-5p	Homo sapiens	HSPA1A	3303	Homo sapiens	Microarray	Functional MTI (Weak)	18185580
MIRT018151	hsa-miR-335-5p	Homo sapiens	CCSAP	126731	Homo sapiens	Microarray	Functional MTI (Weak)	18185580
MIRT018152	hsa-miR-335-5p	Homo sapiens	RGPD8	727851	Homo sapiens	Microarray	Functional MTI (Weak)	18185580
MIRT018153	hsa-miR-335-5p	Homo sapiens	ASPG	374569	Homo sapiens	Microarray	Functional MTI (Weak)	18185580
MIRT018154	hsa-miR-335-5p	Homo sapiens	FGF11	2256	Homo sapiens	Microarray	Functional MTI (Weak)	18185580
MIRT018155	hsa-miR-335-5p	Homo sapiens	CORO7	79585	Homo sapiens	Microarray	Functional MTI (Weak)	18185580
MIRT018156	hsa-miR-335-5p	Homo sapiens	NPAS2	4862	Homo sapiens	Microarray	Functional MTI (Weak)	18185580
MIRT018157	hsa-miR-335-5p	Homo sapiens	TRANK1	9881	Homo sapiens	Microarray	Functional MTI (Weak)	18185580
MIRT018158	hsa-miR-335-5p	Homo sapiens	PAH	5053	Homo sapiens	Microarray	Functional MTI (Weak)	18185580
MIRT018159	hsa-miR-335-5p	Homo sapiens	HECTD1	25831	Homo sapiens	Microarray	Functional MTI (Weak)	18185580
MIRT018160	hsa-miR-335-5p	Homo sapiens	C17orf74	201243	Homo sapiens	Microarray	Functional MTI (Weak)	18185580
MIRT018161	hsa-miR-335-5p	Homo sapiens	KLF13	51621	Homo sapiens	Microarray	Functional MTI (Weak)	18185580
MIRT018162	hsa-miR-335-5p	Homo sapiens	DYNLRB2	83657	Homo sapiens	Microarray	Functional MTI (Weak)	18185580
MIRT018163	hsa-miR-335-5p	Homo sapiens	NUMA1	4926	Homo sapiens	Microarray	Functional MTI (Weak)	18185580
MIRT018164	hsa-miR-335-5p	Homo sapiens	TRAV6	6956	Homo sapiens	Microarray	Functional MTI (Weak)	18185580
MIRT018165	hsa-miR-335-5p	Homo sapiens	NUTM1	256646	Homo sapiens	Microarray	Functional MTI (Weak)	18185580
MIRT018166	hsa-miR-335-5p	Homo sapiens	APAF1	317	Homo sapiens	Microarray	Functional MTI (Weak)	18185580
MIRT018167	hsa-miR-335-5p	Homo sapiens	IL4	3565	Homo sapiens	Microarray	Functional MTI (Weak)	18185580
MIRT018168	hsa-miR-335-5p	Homo sapiens	ATHL1	80162	Homo sapiens	Microarray	Functional MTI (Weak)	18185580
MIRT018169	hsa-miR-335-5p	Homo sapiens	DHX32	55760	Homo sapiens	Microarray	Functional MTI (Weak)	18185580
MIRT018170	hsa-miR-335-5p	Homo sapiens	ACVR2B	93	Homo sapiens	Microarray	Functional MTI (Weak)	18185580
MIRT018171	hsa-miR-335-5p	Homo sapiens	OAS1	4938	Homo sapiens	Microarray	Functional MTI (Weak)	18185580
MIRT018172	hsa-miR-335-5p	Homo sapiens	EDEM3	80267	Homo sapiens	Microarray	Functional MTI (Weak)	18185580
MIRT018173	hsa-miR-335-5p	Homo sapiens	CRABP1	1381	Homo sapiens	Microarray	Functional MTI (Weak)	18185580
MIRT018174	hsa-miR-335-5p	Homo sapiens	ARMC2	84071	Homo sapiens	Microarray	Functional MTI (Weak)	18185580
MIRT018175	hsa-miR-335-5p	Homo sapiens	MLLT4	4301	Homo sapiens	Microarray	Functional MTI (Weak)	18185580
MIRT018176	hsa-miR-335-5p	Homo sapiens	IGLON5	402665	Homo sapiens	Microarray	Functional MTI (Weak)	18185580
MIRT018177	hsa-miR-335-5p	Homo sapiens	MARCH1	55016	Homo sapiens	Microarray	Functional MTI (Weak)	18185580
MIRT018178	hsa-miR-335-5p	Homo sapiens	SLPI	6590	Homo sapiens	Microarray	Functional MTI (Weak)	18185580
MIRT018179	hsa-miR-335-5p	Homo sapiens	LYZL1	84569	Homo sapiens	Microarray	Functional MTI (Weak)	18185580
MIRT018180	hsa-miR-335-5p	Homo sapiens	CDA	978	Homo sapiens	Microarray	Functional MTI (Weak)	18185580
MIRT018181	hsa-miR-335-5p	Homo sapiens	SCAMP1	9522	Homo sapiens	Microarray	Functional MTI (Weak)	18185580
MIRT018182	hsa-miR-335-5p	Homo sapiens	ZNF843	283933	Homo sapiens	Microarray	Functional MTI (Weak)	18185580
MIRT018183	hsa-miR-335-5p	Homo sapiens	ARNTL	406	Homo sapiens	Microarray	Functional MTI (Weak)	18185580
MIRT018184	hsa-miR-335-5p	Homo sapiens	KHDRBS2	202559	Homo sapiens	Microarray	Functional MTI (Weak)	18185580
MIRT018185	hsa-miR-335-5p	Homo sapiens	CA3	761	Homo sapiens	Microarray	Functional MTI (Weak)	18185580
MIRT018186	hsa-miR-335-5p	Homo sapiens	HSD17B3	3293	Homo sapiens	Microarray	Functional MTI (Weak)	18185580
MIRT018187	hsa-miR-335-5p	Homo sapiens	SLC6A16	28968	Homo sapiens	Microarray	Functional MTI (Weak)	18185580
MIRT018188	hsa-miR-335-5p	Homo sapiens	SLC2A3	6515	Homo sapiens	Microarray	Functional MTI (Weak)	18185580
MIRT018189	hsa-miR-335-5p	Homo sapiens	ST3GAL5	8869	Homo sapiens	Microarray	Functional MTI (Weak)	18185580
MIRT018190	hsa-miR-335-5p	Homo sapiens	SLC25A30	253512	Homo sapiens	Microarray	Functional MTI (Weak)	18185580
MIRT018191	hsa-miR-335-5p	Homo sapiens	ASAP3	55616	Homo sapiens	Microarray	Functional MTI (Weak)	18185580
MIRT018192	hsa-miR-335-5p	Homo sapiens	NOVA1	4857	Homo sapiens	Microarray	Functional MTI (Weak)	18185580
MIRT018193	hsa-miR-335-5p	Homo sapiens	SLC9A3R1	9368	Homo sapiens	Microarray	Functional MTI (Weak)	18185580
MIRT018194	hsa-miR-335-5p	Homo sapiens	LMLN	89782	Homo sapiens	Microarray	Functional MTI (Weak)	18185580
MIRT018195	hsa-miR-335-5p	Homo sapiens	TUBA8	51807	Homo sapiens	Microarray	Functional MTI (Weak)	18185580
MIRT018196	hsa-miR-335-5p	Homo sapiens	FOXP1	27086	Homo sapiens	Microarray	Functional MTI (Weak)	18185580
MIRT018197	hsa-miR-335-5p	Homo sapiens	MAGED4	728239	Homo sapiens	Microarray	Functional MTI (Weak)	18185580
MIRT018198	hsa-miR-335-5p	Homo sapiens	TRAFD1	10906	Homo sapiens	Microarray	Functional MTI (Weak)	18185580
MIRT018199	hsa-miR-335-5p	Homo sapiens	CYTH3	9265	Homo sapiens	Microarray	Functional MTI (Weak)	18185580
MIRT018200	hsa-miR-335-5p	Homo sapiens	AGPAT4	56895	Homo sapiens	Microarray	Functional MTI (Weak)	18185580
MIRT018201	hsa-miR-335-5p	Homo sapiens	ATP9A	10079	Homo sapiens	Microarray	Functional MTI (Weak)	18185580
MIRT018202	hsa-miR-335-5p	Homo sapiens	RGS22	26166	Homo sapiens	Microarray	Functional MTI (Weak)	18185580
MIRT018203	hsa-miR-335-5p	Homo sapiens	PPFIA4	8497	Homo sapiens	Microarray	Functional MTI (Weak)	18185580
MIRT018204	hsa-miR-335-5p	Homo sapiens	NUPR1	26471	Homo sapiens	Microarray	Functional MTI (Weak)	18185580
MIRT018205	hsa-miR-335-5p	Homo sapiens	ANK2	287	Homo sapiens	Microarray	Functional MTI (Weak)	18185580
MIRT018206	hsa-miR-335-5p	Homo sapiens	SHISA4	149345	Homo sapiens	Microarray	Functional MTI (Weak)	18185580
MIRT018207	hsa-miR-335-5p	Homo sapiens	TWF1P1	619519	Homo sapiens	Microarray	Functional MTI (Weak)	18185580
MIRT018208	hsa-miR-335-5p	Homo sapiens	ASGR1	432	Homo sapiens	Microarray	Functional MTI (Weak)	18185580
MIRT018209	hsa-miR-335-5p	Homo sapiens	CRNN	49860	Homo sapiens	Microarray	Functional MTI (Weak)	18185580
MIRT018210	hsa-miR-335-5p	Homo sapiens	CTSF	8722	Homo sapiens	Microarray	Functional MTI (Weak)	18185580
MIRT018211	hsa-miR-335-5p	Homo sapiens	RGS8	85397	Homo sapiens	Microarray	Functional MTI (Weak)	18185580
MIRT018212	hsa-miR-335-5p	Homo sapiens	PYROXD2	84795	Homo sapiens	Microarray	Functional MTI (Weak)	18185580
MIRT018213	hsa-miR-335-5p	Homo sapiens	MS4A14	84689	Homo sapiens	Microarray	Functional MTI (Weak)	18185580
MIRT018214	hsa-miR-335-5p	Homo sapiens	SMPDL3A	10924	Homo sapiens	Microarray	Functional MTI (Weak)	18185580
MIRT018215	hsa-miR-335-5p	Homo sapiens	KERA	11081	Homo sapiens	Microarray	Functional MTI (Weak)	18185580
MIRT018216	hsa-miR-335-5p	Homo sapiens	CCR7	1236	Homo sapiens	Microarray	Functional MTI (Weak)	18185580
MIRT018217	hsa-miR-335-5p	Homo sapiens	ODF3B	440836	Homo sapiens	Microarray	Functional MTI (Weak)	18185580
MIRT018218	hsa-miR-335-5p	Homo sapiens	PTH	5741	Homo sapiens	Microarray	Functional MTI (Weak)	18185580
MIRT018219	hsa-miR-335-5p	Homo sapiens	GPR116	221395	Homo sapiens	Microarray	Functional MTI (Weak)	18185580
MIRT018220	hsa-miR-335-5p	Homo sapiens	CCDC69	26112	Homo sapiens	Microarray	Functional MTI (Weak)	18185580
MIRT018221	hsa-miR-335-5p	Homo sapiens	GAGE1	2543	Homo sapiens	Microarray	Functional MTI (Weak)	18185580
MIRT018222	hsa-miR-335-5p	Homo sapiens	NAB1	4664	Homo sapiens	Microarray	Functional MTI (Weak)	18185580
MIRT018223	hsa-miR-335-5p	Homo sapiens	KLHL35	283212	Homo sapiens	Microarray	Functional MTI (Weak)	18185580
MIRT018224	hsa-miR-335-5p	Homo sapiens	THSD4	79875	Homo sapiens	Microarray	Functional MTI (Weak)	18185580
MIRT018225	hsa-miR-335-5p	Homo sapiens	ANKRD20A11P	391267	Homo sapiens	Microarray	Functional MTI (Weak)	18185580
MIRT018226	hsa-miR-335-5p	Homo sapiens	FAM83B	222584	Homo sapiens	Microarray	Functional MTI (Weak)	18185580
MIRT018227	hsa-miR-335-5p	Homo sapiens	ARHGEF1	9138	Homo sapiens	Microarray	Functional MTI (Weak)	18185580
MIRT018228	hsa-miR-335-5p	Homo sapiens	SLC25A1	6576	Homo sapiens	Microarray	Functional MTI (Weak)	18185580
MIRT018229	hsa-miR-335-5p	Homo sapiens	CCNA1	8900	Homo sapiens	Microarray	Functional MTI (Weak)	18185580
MIRT018230	hsa-miR-335-5p	Homo sapiens	CCR2	729230	Homo sapiens	Microarray	Functional MTI (Weak)	18185580
MIRT018231	hsa-miR-335-5p	Homo sapiens	MYO7A	4647	Homo sapiens	Microarray	Functional MTI (Weak)	18185580
MIRT018232	hsa-miR-335-5p	Homo sapiens	KRTAP10-12	386685	Homo sapiens	Microarray	Functional MTI (Weak)	18185580
MIRT018233	hsa-miR-335-5p	Homo sapiens	TMEM181	57583	Homo sapiens	Microarray	Functional MTI (Weak)	18185580
MIRT018234	hsa-miR-335-5p	Homo sapiens	CEACAM5	1048	Homo sapiens	Microarray	Functional MTI (Weak)	18185580
MIRT018235	hsa-miR-335-5p	Homo sapiens	G6PD	2539	Homo sapiens	Microarray	Functional MTI (Weak)	18185580
MIRT018236	hsa-miR-335-5p	Homo sapiens	PPP2R5A	5525	Homo sapiens	Microarray	Functional MTI (Weak)	18185580
MIRT018237	hsa-miR-335-5p	Homo sapiens	INSIG1	3638	Homo sapiens	Microarray	Functional MTI (Weak)	18185580
MIRT018238	hsa-miR-335-5p	Homo sapiens	VPS9D1	9605	Homo sapiens	Microarray	Functional MTI (Weak)	18185580
MIRT018239	hsa-miR-335-5p	Homo sapiens	VILL	50853	Homo sapiens	Microarray	Functional MTI (Weak)	18185580
MIRT018240	hsa-miR-335-5p	Homo sapiens	CERCAM	51148	Homo sapiens	Microarray	Functional MTI (Weak)	18185580
MIRT018241	hsa-miR-335-5p	Homo sapiens	GCH1	2643	Homo sapiens	Microarray	Functional MTI (Weak)	18185580
MIRT018242	hsa-miR-335-5p	Homo sapiens	TPPP3	51673	Homo sapiens	Microarray	Functional MTI (Weak)	18185580
MIRT018243	hsa-miR-335-5p	Homo sapiens	LILRA3	11026	Homo sapiens	Microarray	Functional MTI (Weak)	18185580
MIRT018244	hsa-miR-335-5p	Homo sapiens	BMP1	649	Homo sapiens	Microarray	Functional MTI (Weak)	18185580
MIRT018245	hsa-miR-335-5p	Homo sapiens	TMEM140	55281	Homo sapiens	Microarray	Functional MTI (Weak)	18185580
MIRT018246	hsa-miR-335-5p	Homo sapiens	NUTM2A	728118	Homo sapiens	Microarray	Functional MTI (Weak)	18185580
MIRT018247	hsa-miR-335-5p	Homo sapiens	RHOT1	55288	Homo sapiens	Microarray	Functional MTI (Weak)	18185580
MIRT018248	hsa-miR-335-5p	Homo sapiens	FGFRL1	53834	Homo sapiens	Microarray	Functional MTI (Weak)	18185580
MIRT018249	hsa-miR-335-5p	Homo sapiens	ADAMTS12	81792	Homo sapiens	Microarray	Functional MTI (Weak)	18185580
MIRT018250	hsa-miR-335-5p	Homo sapiens	TNFRSF10D	8793	Homo sapiens	Microarray	Functional MTI (Weak)	18185580
MIRT018251	hsa-miR-335-5p	Homo sapiens	PLA2G10	8399	Homo sapiens	Microarray	Functional MTI (Weak)	18185580
MIRT018252	hsa-miR-335-5p	Homo sapiens	LEMD3	23592	Homo sapiens	Microarray	Functional MTI (Weak)	18185580
MIRT018253	hsa-miR-335-5p	Homo sapiens	AMT	275	Homo sapiens	Microarray	Functional MTI (Weak)	18185580
MIRT018254	hsa-miR-335-5p	Homo sapiens	PDE4D	5144	Homo sapiens	Microarray	Functional MTI (Weak)	18185580
MIRT018255	hsa-miR-335-5p	Homo sapiens	GLTSCR1L	23506	Homo sapiens	Microarray	Functional MTI (Weak)	18185580
MIRT018256	hsa-miR-335-5p	Homo sapiens	RASD1	51655	Homo sapiens	Microarray	Functional MTI (Weak)	18185580
MIRT018257	hsa-miR-335-5p	Homo sapiens	C1orf168	199920	Homo sapiens	Microarray	Functional MTI (Weak)	18185580
MIRT018258	hsa-miR-335-5p	Homo sapiens	SLC39A2	29986	Homo sapiens	Microarray	Functional MTI (Weak)	18185580
MIRT018259	hsa-miR-335-5p	Homo sapiens	PPP4R1L	55370	Homo sapiens	Microarray	Functional MTI (Weak)	18185580
MIRT018260	hsa-miR-335-5p	Homo sapiens	RICTOR	253260	Homo sapiens	Microarray	Functional MTI (Weak)	18185580
MIRT018261	hsa-miR-335-5p	Homo sapiens	FAM211A	388341	Homo sapiens	Microarray	Functional MTI (Weak)	18185580
MIRT018262	hsa-miR-335-5p	Homo sapiens	EGR3	1960	Homo sapiens	Microarray	Functional MTI (Weak)	18185580
MIRT018263	hsa-miR-335-5p	Homo sapiens	LSAMP	4045	Homo sapiens	Microarray	Functional MTI (Weak)	18185580
MIRT018264	hsa-miR-335-5p	Homo sapiens	COL21A1	81578	Homo sapiens	Microarray	Functional MTI (Weak)	18185580
MIRT018265	hsa-miR-335-5p	Homo sapiens	TMEM239	100288797	Homo sapiens	Microarray	Functional MTI (Weak)	18185580
MIRT018266	hsa-miR-335-5p	Homo sapiens	HLA-DMA	3108	Homo sapiens	Microarray	Functional MTI (Weak)	18185580
MIRT018267	hsa-miR-335-5p	Homo sapiens	SNCB	6620	Homo sapiens	Microarray	Functional MTI (Weak)	18185580
MIRT018268	hsa-miR-335-5p	Homo sapiens	EDEM1	9695	Homo sapiens	Microarray	Functional MTI (Weak)	18185580
MIRT018269	hsa-miR-335-5p	Homo sapiens	SH3PXD2B	285590	Homo sapiens	Microarray	Functional MTI (Weak)	18185580
MIRT018270	hsa-miR-335-5p	Homo sapiens	PGLYRP1	8993	Homo sapiens	Microarray	Functional MTI (Weak)	18185580
MIRT018271	hsa-miR-335-5p	Homo sapiens	CLIP3	25999	Homo sapiens	Microarray	Functional MTI (Weak)	18185580
MIRT018272	hsa-miR-335-5p	Homo sapiens	HSPG2	3339	Homo sapiens	Microarray	Functional MTI (Weak)	18185580
MIRT018273	hsa-miR-335-5p	Homo sapiens	KLHL11	55175	Homo sapiens	Microarray	Functional MTI (Weak)	18185580
MIRT018274	hsa-miR-335-5p	Homo sapiens	ACSS2	55902	Homo sapiens	Microarray	Functional MTI (Weak)	18185580
MIRT018275	hsa-miR-335-5p	Homo sapiens	DACT1	51339	Homo sapiens	Microarray	Functional MTI (Weak)	18185580
MIRT018276	hsa-miR-335-5p	Homo sapiens	VPS13B	157680	Homo sapiens	Microarray	Functional MTI (Weak)	18185580
MIRT018277	hsa-miR-335-5p	Homo sapiens	CST1	1469	Homo sapiens	Microarray	Functional MTI (Weak)	18185580
MIRT018278	hsa-miR-335-5p	Homo sapiens	CXCL3	2921	Homo sapiens	Microarray	Functional MTI (Weak)	18185580
MIRT018279	hsa-miR-335-5p	Homo sapiens	ZNF467	168544	Homo sapiens	Microarray	Functional MTI (Weak)	18185580
MIRT018280	hsa-miR-335-5p	Homo sapiens	PAGE2B	389860	Homo sapiens	Microarray	Functional MTI (Weak)	18185580
MIRT018281	hsa-miR-335-5p	Homo sapiens	PDZD4	57595	Homo sapiens	Microarray	Functional MTI (Weak)	18185580
MIRT018282	hsa-miR-335-5p	Homo sapiens	CCDC30	728621	Homo sapiens	Microarray	Functional MTI (Weak)	18185580
MIRT018283	hsa-miR-335-5p	Homo sapiens	SREBF2	6721	Homo sapiens	Microarray	Functional MTI (Weak)	18185580
MIRT018284	hsa-miR-335-5p	Homo sapiens	AGFG2	3268	Homo sapiens	Microarray	Functional MTI (Weak)	18185580
MIRT018285	hsa-miR-335-5p	Homo sapiens	RGPD3	653489	Homo sapiens	Microarray	Functional MTI (Weak)	18185580
MIRT018286	hsa-miR-335-5p	Homo sapiens	DOK6	220164	Homo sapiens	Microarray	Functional MTI (Weak)	18185580
MIRT018287	hsa-miR-335-5p	Homo sapiens	ACBD3	64746	Homo sapiens	Microarray	Functional MTI (Weak)	18185580
MIRT018288	hsa-miR-335-5p	Homo sapiens	RGL2	5863	Homo sapiens	Microarray	Functional MTI (Weak)	18185580
MIRT018289	hsa-miR-335-5p	Homo sapiens	ADH6	130	Homo sapiens	Microarray	Functional MTI (Weak)	18185580
MIRT018290	hsa-miR-335-5p	Homo sapiens	ZKSCAN8	7745	Homo sapiens	Microarray	Functional MTI (Weak)	18185580
MIRT018291	hsa-miR-335-5p	Homo sapiens	VLDLR	7436	Homo sapiens	Microarray	Functional MTI (Weak)	18185580
MIRT018292	hsa-miR-335-5p	Homo sapiens	C6orf141	135398	Homo sapiens	Microarray	Functional MTI (Weak)	18185580
MIRT018293	hsa-miR-335-5p	Homo sapiens	GXYLT1	283464	Homo sapiens	Microarray	Functional MTI (Weak)	18185580
MIRT018294	hsa-miR-335-5p	Homo sapiens	NDP	4693	Homo sapiens	Microarray	Functional MTI (Weak)	18185580
MIRT018295	hsa-miR-335-5p	Homo sapiens	SLC16A4	9122	Homo sapiens	Microarray	Functional MTI (Weak)	18185580
MIRT018296	hsa-miR-335-5p	Homo sapiens	CD9	928	Homo sapiens	Microarray	Functional MTI (Weak)	18185580
MIRT018297	hsa-miR-335-5p	Homo sapiens	RNF19B	127544	Homo sapiens	Microarray	Functional MTI (Weak)	18185580
MIRT018298	hsa-miR-335-5p	Homo sapiens	AGRP	181	Homo sapiens	Microarray	Functional MTI (Weak)	18185580
MIRT018299	hsa-miR-335-5p	Homo sapiens	COL3A1	1281	Homo sapiens	Microarray	Functional MTI (Weak)	18185580
MIRT018300	hsa-miR-335-5p	Homo sapiens	KALRN	8997	Homo sapiens	Microarray	Functional MTI (Weak)	18185580
MIRT018301	hsa-miR-335-5p	Homo sapiens	FAM65C	140876	Homo sapiens	Microarray	Functional MTI (Weak)	18185580
MIRT018302	hsa-miR-335-5p	Homo sapiens	WBP2	23558	Homo sapiens	Microarray	Functional MTI (Weak)	18185580
MIRT018303	hsa-miR-335-5p	Homo sapiens	PAQR6	79957	Homo sapiens	Microarray	Functional MTI (Weak)	18185580
MIRT018304	hsa-miR-335-5p	Homo sapiens	LINC00319	284836	Homo sapiens	Microarray	Functional MTI (Weak)	18185580
MIRT018305	hsa-miR-335-5p	Homo sapiens	PUS10	150962	Homo sapiens	Microarray	Functional MTI (Weak)	18185580
MIRT018306	hsa-miR-335-5p	Homo sapiens	CTXN1	404217	Homo sapiens	Microarray	Functional MTI (Weak)	18185580
MIRT018307	hsa-miR-335-5p	Homo sapiens	INO80B	83444	Homo sapiens	Microarray	Functional MTI (Weak)	18185580
MIRT018308	hsa-miR-335-5p	Homo sapiens	KIAA1217	56243	Homo sapiens	Microarray	Functional MTI (Weak)	18185580
MIRT018309	hsa-miR-335-5p	Homo sapiens	SHC3	53358	Homo sapiens	Microarray	Functional MTI (Weak)	18185580
MIRT018310	hsa-miR-335-5p	Homo sapiens	PPP1R1A	5502	Homo sapiens	Microarray	Functional MTI (Weak)	18185580
MIRT018311	hsa-miR-335-5p	Homo sapiens	IFT81	28981	Homo sapiens	Microarray	Functional MTI (Weak)	18185580
MIRT018312	hsa-miR-335-5p	Homo sapiens	RDH5	5959	Homo sapiens	Microarray	Functional MTI (Weak)	18185580
MIRT018313	hsa-miR-335-5p	Homo sapiens	HIP1R	9026	Homo sapiens	Microarray	Functional MTI (Weak)	18185580
MIRT018314	hsa-miR-335-5p	Homo sapiens	WFDC3	140686	Homo sapiens	Microarray	Functional MTI (Weak)	18185580
MIRT018315	hsa-miR-335-5p	Homo sapiens	FBLN2	2199	Homo sapiens	Microarray	Functional MTI (Weak)	18185580
MIRT018316	hsa-miR-335-5p	Homo sapiens	NLRP7	199713	Homo sapiens	Microarray	Functional MTI (Weak)	18185580
MIRT018317	hsa-miR-335-5p	Homo sapiens	CXCL2	2920	Homo sapiens	Microarray	Functional MTI (Weak)	18185580
MIRT018318	hsa-miR-335-5p	Homo sapiens	PML	5371	Homo sapiens	Microarray	Functional MTI (Weak)	18185580
MIRT018319	hsa-miR-335-5p	Homo sapiens	TRAV12-2	28673	Homo sapiens	Microarray	Functional MTI (Weak)	18185580
MIRT018320	hsa-miR-335-5p	Homo sapiens	NEURL3	93082	Homo sapiens	Microarray	Functional MTI (Weak)	18185580
MIRT018321	hsa-miR-335-5p	Homo sapiens	ITGB5	3693	Homo sapiens	Microarray	Functional MTI (Weak)	18185580
MIRT018322	hsa-miR-335-5p	Homo sapiens	CEND1	51286	Homo sapiens	Microarray	Functional MTI (Weak)	18185580
MIRT018323	hsa-miR-335-5p	Homo sapiens	HTN3	3347	Homo sapiens	Microarray	Functional MTI (Weak)	18185580
MIRT018324	hsa-miR-335-5p	Homo sapiens	GPR153	387509	Homo sapiens	Microarray	Functional MTI (Weak)	18185580
MIRT018325	hsa-miR-335-5p	Homo sapiens	SREBF1	6720	Homo sapiens	Microarray	Functional MTI (Weak)	18185580
MIRT018326	hsa-miR-335-5p	Homo sapiens	CALML6	163688	Homo sapiens	Microarray	Functional MTI (Weak)	18185580
MIRT018327	hsa-miR-335-5p	Homo sapiens	GZMK	3003	Homo sapiens	Microarray	Functional MTI (Weak)	18185580
MIRT018328	hsa-miR-335-5p	Homo sapiens	ARMC12	221481	Homo sapiens	Microarray	Functional MTI (Weak)	18185580
MIRT018329	hsa-miR-335-5p	Homo sapiens	CASKIN2	57513	Homo sapiens	Microarray	Functional MTI (Weak)	18185580
MIRT018330	hsa-miR-335-5p	Homo sapiens	OR1J2	26740	Homo sapiens	Microarray	Functional MTI (Weak)	18185580
MIRT018331	hsa-miR-335-5p	Homo sapiens	MUC6	4588	Homo sapiens	Microarray	Functional MTI (Weak)	18185580
MIRT018332	hsa-miR-335-5p	Homo sapiens	BCHE	590	Homo sapiens	Microarray	Functional MTI (Weak)	18185580
MIRT018333	hsa-miR-335-5p	Homo sapiens	GIP	2695	Homo sapiens	Microarray	Functional MTI (Weak)	18185580
MIRT018334	hsa-miR-335-5p	Homo sapiens	C17orf98	388381	Homo sapiens	Microarray	Functional MTI (Weak)	18185580
MIRT018335	hsa-miR-335-5p	Homo sapiens	SLC26A7	115111	Homo sapiens	Microarray	Functional MTI (Weak)	18185580
MIRT018336	hsa-miR-335-5p	Homo sapiens	HS6ST3	266722	Homo sapiens	Microarray	Functional MTI (Weak)	18185580
MIRT018337	hsa-miR-335-5p	Homo sapiens	TNNT2	7139	Homo sapiens	Microarray	Functional MTI (Weak)	18185580
MIRT018338	hsa-miR-335-5p	Homo sapiens	APOC1	341	Homo sapiens	Microarray	Functional MTI (Weak)	18185580
MIRT018339	hsa-miR-335-5p	Homo sapiens	MYO6	4646	Homo sapiens	Microarray	Functional MTI (Weak)	18185580
MIRT018340	hsa-miR-335-5p	Homo sapiens	HAVCR1	26762	Homo sapiens	Microarray	Functional MTI (Weak)	18185580
MIRT018341	hsa-miR-335-5p	Homo sapiens	TFPI	7035	Homo sapiens	Microarray	Functional MTI (Weak)	18185580
MIRT018342	hsa-miR-335-5p	Homo sapiens	FADS1	3992	Homo sapiens	Microarray	Functional MTI (Weak)	18185580
MIRT018343	hsa-miR-335-5p	Homo sapiens	GGT5	2687	Homo sapiens	Microarray	Functional MTI (Weak)	18185580
MIRT018344	hsa-miR-335-5p	Homo sapiens	ANG	283	Homo sapiens	Microarray	Functional MTI (Weak)	18185580
MIRT018345	hsa-miR-335-5p	Homo sapiens	GPR17	2840	Homo sapiens	Microarray	Functional MTI (Weak)	18185580
MIRT018346	hsa-miR-335-5p	Homo sapiens	C2orf81	388963	Homo sapiens	Microarray	Functional MTI (Weak)	18185580
MIRT018347	hsa-miR-335-5p	Homo sapiens	DST	667	Homo sapiens	Microarray	Functional MTI (Weak)	18185580
MIRT018348	hsa-miR-335-5p	Homo sapiens	TVP23C	201158	Homo sapiens	Microarray	Functional MTI (Weak)	18185580
MIRT018349	hsa-miR-335-5p	Homo sapiens	RGS13	6003	Homo sapiens	Microarray	Functional MTI (Weak)	18185580
MIRT018350	hsa-miR-335-5p	Homo sapiens	UNC5CL	222643	Homo sapiens	Microarray	Functional MTI (Weak)	18185580
MIRT018351	hsa-miR-335-5p	Homo sapiens	FNDC7	163479	Homo sapiens	Microarray	Functional MTI (Weak)	18185580
MIRT018352	hsa-miR-335-5p	Homo sapiens	NUTM2D	728130	Homo sapiens	Microarray	Functional MTI (Weak)	18185580
MIRT018353	hsa-miR-335-5p	Homo sapiens	NPY1R	4886	Homo sapiens	Microarray	Functional MTI (Weak)	18185580
MIRT018354	hsa-miR-335-5p	Homo sapiens	ABHD2	11057	Homo sapiens	Microarray	Functional MTI (Weak)	18185580
MIRT018355	hsa-miR-335-5p	Homo sapiens	VASN	114990	Homo sapiens	Microarray	Functional MTI (Weak)	18185580
MIRT018356	hsa-miR-335-5p	Homo sapiens	EFNA5	1946	Homo sapiens	Microarray	Functional MTI (Weak)	18185580
MIRT018357	hsa-miR-335-5p	Homo sapiens	IL36RN	26525	Homo sapiens	Microarray	Functional MTI (Weak)	18185580
MIRT018358	hsa-miR-335-5p	Homo sapiens	XAF1	54739	Homo sapiens	Microarray	Functional MTI (Weak)	18185580
MIRT018359	hsa-miR-335-5p	Homo sapiens	SDR16C5	195814	Homo sapiens	Microarray	Functional MTI (Weak)	18185580
MIRT018360	hsa-miR-335-5p	Homo sapiens	OLIG3	167826	Homo sapiens	Microarray	Functional MTI (Weak)	18185580
MIRT018361	hsa-miR-335-5p	Homo sapiens	ATL1	51062	Homo sapiens	Microarray	Functional MTI (Weak)	18185580
MIRT018362	hsa-miR-335-5p	Homo sapiens	ACVR1	90	Homo sapiens	Microarray	Functional MTI (Weak)	18185580
MIRT018363	hsa-miR-335-5p	Homo sapiens	KIAA1109	84162	Homo sapiens	Microarray	Functional MTI (Weak)	18185580
MIRT018364	hsa-miR-335-5p	Homo sapiens	ZBTB20	26137	Homo sapiens	Microarray	Functional MTI (Weak)	18185580
MIRT018365	hsa-miR-335-5p	Homo sapiens	ADORA2A-AS1	646023	Homo sapiens	Microarray	Functional MTI (Weak)	18185580
MIRT018366	hsa-miR-335-5p	Homo sapiens	NCOA3	8202	Homo sapiens	Microarray	Functional MTI (Weak)	18185580
MIRT018367	hsa-miR-335-5p	Homo sapiens	PLEKHG4	25894	Homo sapiens	Microarray	Functional MTI (Weak)	18185580
MIRT018368	hsa-miR-335-5p	Homo sapiens	SPIC	121599	Homo sapiens	Microarray	Functional MTI (Weak)	18185580
MIRT018369	hsa-miR-335-5p	Homo sapiens	PAK3	5063	Homo sapiens	Microarray	Functional MTI (Weak)	18185580
MIRT018370	hsa-miR-335-5p	Homo sapiens	KIF13B	23303	Homo sapiens	Microarray	Functional MTI (Weak)	18185580
MIRT018371	hsa-miR-335-5p	Homo sapiens	FPGT	8790	Homo sapiens	Microarray	Functional MTI (Weak)	18185580
MIRT018372	hsa-miR-335-5p	Homo sapiens	ZDHHC19	131540	Homo sapiens	Microarray	Functional MTI (Weak)	18185580
MIRT018373	hsa-miR-335-5p	Homo sapiens	LONRF1	91694	Homo sapiens	Microarray	Functional MTI (Weak)	18185580
MIRT018374	hsa-miR-335-5p	Homo sapiens	ZCWPW2	152098	Homo sapiens	Microarray	Functional MTI (Weak)	18185580
MIRT018375	hsa-miR-335-5p	Homo sapiens	PKD2L1	9033	Homo sapiens	Microarray	Functional MTI (Weak)	18185580
MIRT018376	hsa-miR-335-5p	Homo sapiens	RGPD1	400966	Homo sapiens	Microarray	Functional MTI (Weak)	18185580
MIRT018377	hsa-miR-335-5p	Homo sapiens	DOCK11	139818	Homo sapiens	Microarray	Functional MTI (Weak)	18185580
MIRT018378	hsa-miR-335-5p	Homo sapiens	EGFR	1956	Homo sapiens	Microarray	Functional MTI (Weak)	18185580
MIRT018379	hsa-miR-335-5p	Homo sapiens	ENTHD1	150350	Homo sapiens	Microarray	Functional MTI (Weak)	18185580
MIRT018380	hsa-miR-335-5p	Homo sapiens	NEUROD2	4761	Homo sapiens	Microarray	Functional MTI (Weak)	18185580
MIRT018381	hsa-miR-335-5p	Homo sapiens	SMTNL2	342527	Homo sapiens	Microarray	Functional MTI (Weak)	18185580
MIRT018382	hsa-miR-335-5p	Homo sapiens	SLC2A11	66035	Homo sapiens	Microarray	Functional MTI (Weak)	18185580
MIRT018383	hsa-miR-335-5p	Homo sapiens	ACE	1636	Homo sapiens	Microarray	Functional MTI (Weak)	18185580
MIRT018384	hsa-miR-335-5p	Homo sapiens	OR3A1	4994	Homo sapiens	Microarray	Functional MTI (Weak)	18185580
MIRT018385	hsa-miR-335-5p	Homo sapiens	PCSK4	54760	Homo sapiens	Microarray	Functional MTI (Weak)	18185580
MIRT018386	hsa-miR-335-5p	Homo sapiens	GRM3	2913	Homo sapiens	Microarray	Functional MTI (Weak)	18185580
MIRT018387	hsa-miR-335-5p	Homo sapiens	CLCA4	22802	Homo sapiens	Microarray	Functional MTI (Weak)	18185580
MIRT018388	hsa-miR-335-5p	Homo sapiens	INSC	387755	Homo sapiens	Microarray	Functional MTI (Weak)	18185580
MIRT018389	hsa-miR-335-5p	Homo sapiens	TMEM41B	440026	Homo sapiens	Microarray	Functional MTI (Weak)	18185580
MIRT018390	hsa-miR-335-5p	Homo sapiens	AGO4	192670	Homo sapiens	Microarray	Functional MTI (Weak)	18185580
MIRT018391	hsa-miR-335-5p	Homo sapiens	PPM1E	22843	Homo sapiens	Microarray	Functional MTI (Weak)	18185580
MIRT018392	hsa-miR-335-5p	Homo sapiens	KLF7	8609	Homo sapiens	Microarray	Functional MTI (Weak)	18185580
MIRT018393	hsa-miR-335-5p	Homo sapiens	FOXQ1	94234	Homo sapiens	Microarray	Functional MTI (Weak)	18185580
MIRT018394	hsa-miR-335-5p	Homo sapiens	ZNF829	374899	Homo sapiens	Microarray	Functional MTI (Weak)	18185580
MIRT018395	hsa-miR-335-5p	Homo sapiens	KLHDC7B	113730	Homo sapiens	Microarray	Functional MTI (Weak)	18185580
MIRT018396	hsa-miR-335-5p	Homo sapiens	APCDD1L	164284	Homo sapiens	Microarray	Functional MTI (Weak)	18185580
MIRT018397	hsa-miR-335-5p	Homo sapiens	BEX2	84707	Homo sapiens	Microarray	Functional MTI (Weak)	18185580
MIRT018398	hsa-miR-335-5p	Homo sapiens	CALHM3	119395	Homo sapiens	Microarray	Functional MTI (Weak)	18185580
MIRT018399	hsa-miR-335-5p	Homo sapiens	SQSTM1	8878	Homo sapiens	Microarray	Functional MTI (Weak)	18185580
MIRT018400	hsa-miR-335-5p	Homo sapiens	LINC00684	100129407	Homo sapiens	Microarray	Functional MTI (Weak)	18185580
MIRT018401	hsa-miR-335-5p	Homo sapiens	AGR2	10551	Homo sapiens	Microarray	Functional MTI (Weak)	18185580
MIRT018402	hsa-miR-335-5p	Homo sapiens	ZNF800	168850	Homo sapiens	Microarray	Functional MTI (Weak)	18185580
MIRT018403	hsa-miR-335-5p	Homo sapiens	GLS	2744	Homo sapiens	Microarray	Functional MTI (Weak)	18185580
MIRT018404	hsa-miR-335-5p	Homo sapiens	EFNA2	1943	Homo sapiens	Microarray	Functional MTI (Weak)	18185580
MIRT018405	hsa-miR-335-5p	Homo sapiens	LOX	4015	Homo sapiens	Microarray	Functional MTI (Weak)	18185580
MIRT018406	hsa-miR-335-5p	Homo sapiens	RPH3AL	9501	Homo sapiens	Microarray	Functional MTI (Weak)	18185580
MIRT018407	hsa-miR-335-5p	Homo sapiens	CDHR2	54825	Homo sapiens	Microarray	Functional MTI (Weak)	18185580
MIRT018408	hsa-miR-335-5p	Homo sapiens	CYP7A1	1581	Homo sapiens	Microarray	Functional MTI (Weak)	18185580
MIRT018409	hsa-miR-335-5p	Homo sapiens	TBX22	50945	Homo sapiens	Microarray	Functional MTI (Weak)	18185580
MIRT018410	hsa-miR-335-5p	Homo sapiens	MFNG	4242	Homo sapiens	Microarray	Functional MTI (Weak)	18185580
MIRT018411	hsa-miR-335-5p	Homo sapiens	TLR4	7099	Homo sapiens	Microarray	Functional MTI (Weak)	18185580
MIRT018412	hsa-miR-335-5p	Homo sapiens	PCDHGA2	56113	Homo sapiens	Microarray	Functional MTI (Weak)	18185580
MIRT018413	hsa-miR-335-5p	Homo sapiens	CST6	1474	Homo sapiens	Microarray	Functional MTI (Weak)	18185580
MIRT018414	hsa-miR-335-5p	Homo sapiens	NDRG1	10397	Homo sapiens	Microarray	Functional MTI (Weak)	18185580
MIRT018415	hsa-miR-335-5p	Homo sapiens	ARSF	416	Homo sapiens	Microarray	Functional MTI (Weak)	18185580
MIRT018416	hsa-miR-335-5p	Homo sapiens	FIZ1	84922	Homo sapiens	Microarray	Functional MTI (Weak)	18185580
MIRT018417	hsa-miR-335-5p	Homo sapiens	SEC61A1	29927	Homo sapiens	Microarray	Functional MTI (Weak)	18185580
MIRT018418	hsa-miR-335-5p	Homo sapiens	SNAI1	6615	Homo sapiens	Microarray	Functional MTI (Weak)	18185580
MIRT018419	hsa-miR-335-5p	Homo sapiens	SPTBN2	6712	Homo sapiens	Microarray	Functional MTI (Weak)	18185580
MIRT018420	hsa-miR-335-5p	Homo sapiens	NKAIN1	79570	Homo sapiens	Microarray	Functional MTI (Weak)	18185580
MIRT018421	hsa-miR-335-5p	Homo sapiens	NPHS2	7827	Homo sapiens	Microarray	Functional MTI (Weak)	18185580
MIRT018422	hsa-miR-335-5p	Homo sapiens	LOH12CR1	118426	Homo sapiens	Microarray	Functional MTI (Weak)	18185580
MIRT018423	hsa-miR-335-5p	Homo sapiens	SMIM14	201895	Homo sapiens	Microarray	Functional MTI (Weak)	18185580
MIRT018424	hsa-miR-335-5p	Homo sapiens	EVC	2121	Homo sapiens	Microarray	Functional MTI (Weak)	18185580
MIRT018425	hsa-miR-335-5p	Homo sapiens	FDFT1	2222	Homo sapiens	Microarray	Functional MTI (Weak)	18185580
MIRT018426	hsa-miR-335-5p	Homo sapiens	ART3	419	Homo sapiens	Microarray	Functional MTI (Weak)	18185580
MIRT018427	hsa-miR-335-5p	Homo sapiens	H6PD	9563	Homo sapiens	Microarray	Functional MTI (Weak)	18185580
MIRT018428	hsa-miR-335-5p	Homo sapiens	ZMAT1	84460	Homo sapiens	Microarray	Functional MTI (Weak)	18185580
MIRT018429	hsa-miR-335-5p	Homo sapiens	BNC1	646	Homo sapiens	Microarray	Functional MTI (Weak)	18185580
MIRT018430	hsa-miR-335-5p	Homo sapiens	ASCL2	430	Homo sapiens	Microarray	Functional MTI (Weak)	18185580
MIRT018431	hsa-miR-335-5p	Homo sapiens	SNAP91	9892	Homo sapiens	Microarray	Functional MTI (Weak)	18185580
MIRT018432	hsa-miR-335-5p	Homo sapiens	RN7SK	125050	Homo sapiens	Microarray	Functional MTI (Weak)	18185580
MIRT018433	hsa-miR-335-5p	Homo sapiens	ZEB1	6935	Homo sapiens	Microarray	Functional MTI (Weak)	18185580
MIRT018434	hsa-miR-335-5p	Homo sapiens	C17orf78	284099	Homo sapiens	Microarray	Functional MTI (Weak)	18185580
MIRT018435	hsa-miR-335-5p	Homo sapiens	COL6A6	131873	Homo sapiens	Microarray	Functional MTI (Weak)	18185580
MIRT018436	hsa-miR-335-5p	Homo sapiens	TMC8	147138	Homo sapiens	Microarray	Functional MTI (Weak)	18185580
MIRT018437	hsa-miR-335-5p	Homo sapiens	GOT1L1	137362	Homo sapiens	Microarray	Functional MTI (Weak)	18185580
MIRT018438	hsa-miR-335-5p	Homo sapiens	CFI	3426	Homo sapiens	Microarray	Functional MTI (Weak)	18185580
MIRT018439	hsa-miR-335-5p	Homo sapiens	ITGA1	3672	Homo sapiens	Microarray	Functional MTI (Weak)	18185580
MIRT018440	hsa-miR-335-5p	Homo sapiens	PSAP	5660	Homo sapiens	Microarray	Functional MTI (Weak)	18185580
MIRT018441	hsa-miR-335-5p	Homo sapiens	FZD8	8325	Homo sapiens	Microarray	Functional MTI (Weak)	18185580
MIRT018442	hsa-miR-335-5p	Homo sapiens	TSTD1	100131187	Homo sapiens	Microarray	Functional MTI (Weak)	18185580
MIRT018443	hsa-miR-335-5p	Homo sapiens	RASGEF1C	255426	Homo sapiens	Microarray	Functional MTI (Weak)	18185580
MIRT018444	hsa-miR-335-5p	Homo sapiens	MMEL1	79258	Homo sapiens	Microarray	Functional MTI (Weak)	18185580
MIRT018445	hsa-miR-335-5p	Homo sapiens	COL9A3	1299	Homo sapiens	Microarray	Functional MTI (Weak)	18185580
MIRT018446	hsa-miR-335-5p	Homo sapiens	TRAV39	28642	Homo sapiens	Microarray	Functional MTI (Weak)	18185580
MIRT018447	hsa-miR-335-5p	Homo sapiens	ABCC8	6833	Homo sapiens	Microarray	Functional MTI (Weak)	18185580
MIRT018448	hsa-miR-335-5p	Homo sapiens	RBM43	375287	Homo sapiens	Microarray	Functional MTI (Weak)	18185580
MIRT018449	hsa-miR-335-5p	Homo sapiens	PIK3C2B	5287	Homo sapiens	Microarray	Functional MTI (Weak)	18185580
MIRT018450	hsa-miR-335-5p	Homo sapiens	WWTR1	25937	Homo sapiens	Microarray	Functional MTI (Weak)	18185580
MIRT018451	hsa-miR-335-5p	Homo sapiens	PDP1	54704	Homo sapiens	Microarray	Functional MTI (Weak)	18185580
MIRT018452	hsa-miR-335-5p	Homo sapiens	ID4	3400	Homo sapiens	Reporter assay;Western blot;Other	Functional MTI	21618216
MIRT018453	hsa-miR-335-5p	Homo sapiens	MEOX2	4223	Homo sapiens	Microarray	Functional MTI (Weak)	18185580
MIRT018454	hsa-miR-335-5p	Homo sapiens	MIR192	406967	Homo sapiens	Microarray	Functional MTI (Weak)	18185580
MIRT018455	hsa-miR-335-5p	Homo sapiens	FOXD2	2306	Homo sapiens	Microarray	Functional MTI (Weak)	18185580
MIRT018456	hsa-miR-335-5p	Homo sapiens	KRTAP3-2	83897	Homo sapiens	Microarray	Functional MTI (Weak)	18185580
MIRT018457	hsa-miR-335-5p	Homo sapiens	ANKIB1	54467	Homo sapiens	Microarray	Functional MTI (Weak)	18185580
MIRT018458	hsa-miR-335-5p	Homo sapiens	SQLE	6713	Homo sapiens	Microarray	Functional MTI (Weak)	18185580
MIRT018459	hsa-miR-335-5p	Homo sapiens	BAAT	570	Homo sapiens	Microarray	Functional MTI (Weak)	18185580
MIRT018460	hsa-miR-335-5p	Homo sapiens	MAP1LC3B	81631	Homo sapiens	Microarray	Functional MTI (Weak)	18185580
MIRT018461	hsa-miR-335-5p	Homo sapiens	HIPK3	10114	Homo sapiens	Microarray	Functional MTI (Weak)	18185580
MIRT018462	hsa-miR-335-5p	Homo sapiens	ZNF135	7694	Homo sapiens	Microarray	Functional MTI (Weak)	18185580
MIRT018463	hsa-miR-335-5p	Homo sapiens	P2RY2	5029	Homo sapiens	Microarray	Functional MTI (Weak)	18185580
MIRT018464	hsa-miR-335-5p	Homo sapiens	MLN	4295	Homo sapiens	Microarray	Functional MTI (Weak)	18185580
MIRT018465	hsa-miR-335-5p	Homo sapiens	NR4A2	4929	Homo sapiens	Microarray	Functional MTI (Weak)	18185580
MIRT018466	hsa-miR-335-5p	Homo sapiens	FGF4	2249	Homo sapiens	Microarray	Functional MTI (Weak)	18185580
MIRT018467	hsa-miR-335-5p	Homo sapiens	STX19	415117	Homo sapiens	Microarray	Functional MTI (Weak)	18185580
MIRT018468	hsa-miR-335-5p	Homo sapiens	HCRTR1	3061	Homo sapiens	Microarray	Functional MTI (Weak)	18185580
MIRT018469	hsa-miR-335-5p	Homo sapiens	ZNF442	79973	Homo sapiens	Microarray	Functional MTI (Weak)	18185580
MIRT018470	hsa-miR-335-5p	Homo sapiens	ACPL2	92370	Homo sapiens	Microarray	Functional MTI (Weak)	18185580
MIRT018471	hsa-miR-335-5p	Homo sapiens	C20orf96	140680	Homo sapiens	Microarray	Functional MTI (Weak)	18185580
MIRT018472	hsa-miR-335-5p	Homo sapiens	KIFC2	90990	Homo sapiens	Microarray	Functional MTI (Weak)	18185580
MIRT018473	hsa-miR-335-5p	Homo sapiens	KLHL5	51088	Homo sapiens	Microarray	Functional MTI (Weak)	18185580
MIRT018474	hsa-miR-335-5p	Homo sapiens	TRPV4	59341	Homo sapiens	Microarray	Functional MTI (Weak)	18185580
MIRT018475	hsa-miR-335-5p	Homo sapiens	IL21R	50615	Homo sapiens	Microarray	Functional MTI (Weak)	18185580
MIRT018476	hsa-miR-335-5p	Homo sapiens	CA5A	763	Homo sapiens	Microarray	Functional MTI (Weak)	18185580
MIRT018477	hsa-miR-335-5p	Homo sapiens	IBTK	25998	Homo sapiens	Microarray	Functional MTI (Weak)	18185580
MIRT018478	hsa-miR-335-5p	Homo sapiens	NT5DC3	51559	Homo sapiens	Microarray	Functional MTI (Weak)	18185580
MIRT018479	hsa-miR-335-5p	Homo sapiens	HRCT1	646962	Homo sapiens	Microarray	Functional MTI (Weak)	18185580
MIRT018480	hsa-miR-335-5p	Homo sapiens	PLEKHA8P1	51054	Homo sapiens	Microarray	Functional MTI (Weak)	18185580
MIRT018481	hsa-miR-335-5p	Homo sapiens	KLK7	5650	Homo sapiens	Microarray	Functional MTI (Weak)	18185580
MIRT018482	hsa-miR-335-5p	Homo sapiens	POM121L1P	25812	Homo sapiens	Microarray	Functional MTI (Weak)	18185580
MIRT018483	hsa-miR-335-5p	Homo sapiens	POFUT2	23275	Homo sapiens	Microarray	Functional MTI (Weak)	18185580
MIRT018484	hsa-miR-335-5p	Homo sapiens	CHST9	83539	Homo sapiens	Microarray	Functional MTI (Weak)	18185580
MIRT018485	hsa-miR-335-5p	Homo sapiens	P4HA3	283208	Homo sapiens	Microarray	Functional MTI (Weak)	18185580
MIRT018486	hsa-miR-335-5p	Homo sapiens	OLFM4	10562	Homo sapiens	Microarray	Functional MTI (Weak)	18185580
MIRT018487	hsa-miR-335-5p	Homo sapiens	AXIN1	8312	Homo sapiens	Microarray	Functional MTI (Weak)	18185580
MIRT018488	hsa-miR-335-5p	Homo sapiens	AQP5	362	Homo sapiens	Microarray	Functional MTI (Weak)	18185580
MIRT018489	hsa-miR-335-5p	Homo sapiens	SYTL1	84958	Homo sapiens	Microarray	Functional MTI (Weak)	18185580
MIRT018490	hsa-miR-335-5p	Homo sapiens	ATP6AP1L	92270	Homo sapiens	Microarray	Functional MTI (Weak)	18185580
MIRT018491	hsa-miR-335-5p	Homo sapiens	RASIP1	54922	Homo sapiens	Microarray	Functional MTI (Weak)	18185580
MIRT018492	hsa-miR-335-5p	Homo sapiens	DMRT3	58524	Homo sapiens	Microarray	Functional MTI (Weak)	18185580
MIRT018493	hsa-miR-335-5p	Homo sapiens	PRDM11	56981	Homo sapiens	Microarray	Functional MTI (Weak)	18185580
MIRT018494	hsa-miR-335-5p	Homo sapiens	LAPTM5	7805	Homo sapiens	Microarray	Functional MTI (Weak)	18185580
MIRT018495	hsa-miR-335-5p	Homo sapiens	RHOBTB1	9886	Homo sapiens	Microarray	Functional MTI (Weak)	18185580
MIRT018496	hsa-miR-335-5p	Homo sapiens	BHLHE41	79365	Homo sapiens	Microarray	Functional MTI (Weak)	18185580
MIRT018497	hsa-miR-335-5p	Homo sapiens	CYTIP	9595	Homo sapiens	Microarray	Functional MTI (Weak)	18185580
MIRT018498	hsa-miR-335-5p	Homo sapiens	TIAM1	7074	Homo sapiens	Microarray	Functional MTI (Weak)	18185580
MIRT018499	hsa-miR-335-5p	Homo sapiens	TNKS2	80351	Homo sapiens	Microarray	Functional MTI (Weak)	18185580
MIRT018500	hsa-miR-335-5p	Homo sapiens	LIM2	3982	Homo sapiens	Microarray	Functional MTI (Weak)	18185580
MIRT018501	hsa-miR-335-5p	Homo sapiens	GRIA1	2890	Homo sapiens	Microarray	Functional MTI (Weak)	18185580
MIRT018502	hsa-miR-335-5p	Homo sapiens	B3GNT3	10331	Homo sapiens	Microarray	Functional MTI (Weak)	18185580
MIRT018503	hsa-miR-335-5p	Homo sapiens	WNT3	7473	Homo sapiens	Microarray	Functional MTI (Weak)	18185580
MIRT018504	hsa-miR-335-5p	Homo sapiens	CHRM3	1131	Homo sapiens	Microarray	Functional MTI (Weak)	18185580
MIRT018505	hsa-miR-335-5p	Homo sapiens	SRGAP2C	653464	Homo sapiens	Microarray	Functional MTI (Weak)	18185580
MIRT018506	hsa-miR-335-5p	Homo sapiens	PROX2	283571	Homo sapiens	Microarray	Functional MTI (Weak)	18185580
MIRT018507	hsa-miR-335-5p	Homo sapiens	RXFP3	51289	Homo sapiens	Microarray	Functional MTI (Weak)	18185580
MIRT018508	hsa-miR-335-5p	Homo sapiens	LRP5	4041	Homo sapiens	Microarray	Functional MTI (Weak)	18185580
MIRT018509	hsa-miR-335-5p	Homo sapiens	SPTB	6710	Homo sapiens	Microarray	Functional MTI (Weak)	18185580
MIRT018510	hsa-miR-335-5p	Homo sapiens	DAP	1611	Homo sapiens	Microarray	Functional MTI (Weak)	18185580
MIRT018511	hsa-miR-335-5p	Homo sapiens	ARID4A	5926	Homo sapiens	Microarray	Functional MTI (Weak)	18185580
MIRT018512	hsa-miR-335-5p	Homo sapiens	KCNH1	3756	Homo sapiens	Microarray	Functional MTI (Weak)	18185580
MIRT018513	hsa-miR-335-5p	Homo sapiens	CTSD	1509	Homo sapiens	Microarray	Functional MTI (Weak)	18185580
MIRT018514	hsa-miR-335-5p	Homo sapiens	ZNRD1-AS1	80862	Homo sapiens	Microarray	Functional MTI (Weak)	18185580
MIRT018515	hsa-miR-335-5p	Homo sapiens	CDH19	28513	Homo sapiens	Microarray	Functional MTI (Weak)	18185580
MIRT018516	hsa-miR-335-5p	Homo sapiens	LINC00238	440184	Homo sapiens	Microarray	Functional MTI (Weak)	18185580
MIRT018517	hsa-miR-335-5p	Homo sapiens	PLEKHH2	130271	Homo sapiens	Microarray	Functional MTI (Weak)	18185580
MIRT018518	hsa-miR-335-5p	Homo sapiens	FBLN5	10516	Homo sapiens	Microarray	Functional MTI (Weak)	18185580
MIRT018519	hsa-miR-335-5p	Homo sapiens	OPN1LW	5956	Homo sapiens	Microarray	Functional MTI (Weak)	18185580
MIRT018520	hsa-miR-335-5p	Homo sapiens	DEFB4A	1673	Homo sapiens	Microarray	Functional MTI (Weak)	18185580
MIRT018521	hsa-miR-335-5p	Homo sapiens	SIRT5	23408	Homo sapiens	Microarray	Functional MTI (Weak)	18185580
MIRT018522	hsa-miR-335-5p	Homo sapiens	GJB4	127534	Homo sapiens	Microarray	Functional MTI (Weak)	18185580
MIRT018523	hsa-miR-335-5p	Homo sapiens	MAFF	23764	Homo sapiens	Microarray	Functional MTI (Weak)	18185580
MIRT018524	hsa-miR-335-5p	Homo sapiens	PTPN7	5778	Homo sapiens	Microarray	Functional MTI (Weak)	18185580
MIRT018525	hsa-miR-335-5p	Homo sapiens	ANKZF1	55139	Homo sapiens	Microarray	Functional MTI (Weak)	18185580
MIRT018526	hsa-miR-335-5p	Homo sapiens	IGIP	492311	Homo sapiens	Microarray	Functional MTI (Weak)	18185580
MIRT018527	hsa-miR-335-5p	Homo sapiens	PLXNA1	5361	Homo sapiens	Microarray	Functional MTI (Weak)	18185580
MIRT018528	hsa-miR-335-5p	Homo sapiens	SCN4A	6329	Homo sapiens	Microarray	Functional MTI (Weak)	18185580
MIRT018529	hsa-miR-335-5p	Homo sapiens	AKR1E2	83592	Homo sapiens	Microarray	Functional MTI (Weak)	18185580
MIRT018530	hsa-miR-335-5p	Homo sapiens	FGFBP3	143282	Homo sapiens	Microarray	Functional MTI (Weak)	18185580
MIRT018531	hsa-miR-335-5p	Homo sapiens	ZNF292	23036	Homo sapiens	Microarray	Functional MTI (Weak)	18185580
MIRT018532	hsa-miR-335-5p	Homo sapiens	USF2	7392	Homo sapiens	Microarray	Functional MTI (Weak)	18185580
MIRT018533	hsa-miR-335-5p	Homo sapiens	AFF4	27125	Homo sapiens	Microarray	Functional MTI (Weak)	18185580
MIRT018534	hsa-miR-335-5p	Homo sapiens	SLC37A2	219855	Homo sapiens	Microarray	Functional MTI (Weak)	21618216
MIRT018535	hsa-miR-335-5p	Homo sapiens	CCSER2	54462	Homo sapiens	Microarray	Functional MTI (Weak)	18185580
MIRT018536	hsa-miR-335-5p	Homo sapiens	IGF1R	3480	Homo sapiens	Reporter assay;Western blot	Functional MTI	21618216
MIRT018537	hsa-miR-335-5p	Homo sapiens	EPN2	22905	Homo sapiens	Reporter assay;Western blot	Functional MTI	21618216
MIRT018538	hsa-miR-335-5p	Homo sapiens	MRGPRX3	117195	Homo sapiens	Microarray	Functional MTI (Weak)	18185580
MIRT018539	hsa-miR-335-5p	Homo sapiens	VWA7	80737	Homo sapiens	Microarray	Functional MTI (Weak)	18185580
MIRT018540	hsa-miR-335-5p	Homo sapiens	KIAA0319L	79932	Homo sapiens	Microarray	Functional MTI (Weak)	18185580
MIRT018541	hsa-miR-335-5p	Homo sapiens	AREG	374	Homo sapiens	Microarray	Functional MTI (Weak)	18185580
MIRT018542	hsa-miR-335-5p	Homo sapiens	ZBTB7C	201501	Homo sapiens	Microarray	Functional MTI (Weak)	18185580
MIRT018543	hsa-miR-335-5p	Homo sapiens	MROH9	80133	Homo sapiens	Microarray	Functional MTI (Weak)	18185580
MIRT018544	hsa-miR-335-5p	Homo sapiens	FGF10	2255	Homo sapiens	Microarray	Functional MTI (Weak)	18185580
MIRT018545	hsa-miR-335-5p	Homo sapiens	IFT122	55764	Homo sapiens	Microarray	Functional MTI (Weak)	18185580
MIRT018546	hsa-miR-335-5p	Homo sapiens	INPP5F	22876	Homo sapiens	Microarray	Functional MTI (Weak)	18185580
MIRT018547	hsa-miR-335-5p	Homo sapiens	DNMT3B	1789	Homo sapiens	Microarray	Functional MTI (Weak)	18185580
MIRT018548	hsa-miR-335-5p	Homo sapiens	GSE1	23199	Homo sapiens	Microarray	Functional MTI (Weak)	18185580
MIRT018549	hsa-miR-335-5p	Homo sapiens	CYP26A1	1592	Homo sapiens	Microarray	Functional MTI (Weak)	18185580
MIRT018550	hsa-miR-335-5p	Homo sapiens	NFIL3	4783	Homo sapiens	Microarray	Functional MTI (Weak)	18185580
MIRT018551	hsa-miR-335-5p	Homo sapiens	EMR3	84658	Homo sapiens	Microarray	Functional MTI (Weak)	18185580
MIRT018552	hsa-miR-335-5p	Homo sapiens	EXD2	55218	Homo sapiens	Microarray	Functional MTI (Weak)	18185580
MIRT018553	hsa-miR-335-5p	Homo sapiens	C16orf46	123775	Homo sapiens	Microarray	Functional MTI (Weak)	18185580
MIRT018554	hsa-miR-335-5p	Homo sapiens	B4GALT6	9331	Homo sapiens	Microarray	Functional MTI (Weak)	18185580
MIRT018555	hsa-miR-335-5p	Homo sapiens	CCDC42	146849	Homo sapiens	Microarray	Functional MTI (Weak)	18185580
MIRT018556	hsa-miR-335-5p	Homo sapiens	IL7	3574	Homo sapiens	Microarray	Functional MTI (Weak)	18185580
MIRT018557	hsa-miR-335-5p	Homo sapiens	RCSD1	92241	Homo sapiens	Microarray	Functional MTI (Weak)	18185580
MIRT018558	hsa-miR-335-5p	Homo sapiens	GAL3ST4	79690	Homo sapiens	Microarray	Functional MTI (Weak)	18185580
MIRT018559	hsa-miR-335-5p	Homo sapiens	DACH1	1602	Homo sapiens	Microarray	Functional MTI (Weak)	18185580
MIRT018560	hsa-miR-335-5p	Homo sapiens	SLC6A10P	386757	Homo sapiens	Microarray	Functional MTI (Weak)	18185580
MIRT018561	hsa-miR-335-5p	Homo sapiens	CA12	771	Homo sapiens	Microarray	Functional MTI (Weak)	18185580
MIRT018562	hsa-miR-335-5p	Homo sapiens	HSPA5	3309	Homo sapiens	Microarray	Functional MTI (Weak)	18185580
MIRT018563	hsa-miR-335-5p	Homo sapiens	EMR1	2015	Homo sapiens	Microarray	Functional MTI (Weak)	18185580
MIRT018564	hsa-miR-335-5p	Homo sapiens	CDH11	1009	Homo sapiens	Microarray	Functional MTI (Weak)	18185580
MIRT018565	hsa-miR-335-5p	Homo sapiens	HLA-DRB5	3127	Homo sapiens	Microarray	Functional MTI (Weak)	18185580
MIRT018566	hsa-miR-335-5p	Homo sapiens	DCAF5	8816	Homo sapiens	Microarray	Functional MTI (Weak)	18185580
MIRT018567	hsa-miR-335-5p	Homo sapiens	SMAD3	4088	Homo sapiens	Microarray	Functional MTI (Weak)	18185580
MIRT018568	hsa-miR-335-5p	Homo sapiens	FRK	2444	Homo sapiens	Microarray	Functional MTI (Weak)	18185580
MIRT018569	hsa-miR-335-5p	Homo sapiens	H1FX-AS1	339942	Homo sapiens	Microarray	Functional MTI (Weak)	18185580
MIRT018570	hsa-miR-335-5p	Homo sapiens	C20orf173	140873	Homo sapiens	Microarray	Functional MTI (Weak)	18185580
MIRT018571	hsa-miR-335-5p	Homo sapiens	BPTF	2186	Homo sapiens	Microarray	Functional MTI (Weak)	18185580
MIRT018572	hsa-miR-335-5p	Homo sapiens	BACH2	60468	Homo sapiens	Microarray	Functional MTI (Weak)	18185580
MIRT018573	hsa-miR-335-5p	Homo sapiens	GNA14	9630	Homo sapiens	Microarray	Functional MTI (Weak)	18185580
MIRT018574	hsa-miR-335-5p	Homo sapiens	GATA5	140628	Homo sapiens	Microarray	Functional MTI (Weak)	18185580
MIRT018575	hsa-miR-335-5p	Homo sapiens	NHLRC3	387921	Homo sapiens	Microarray	Functional MTI (Weak)	18185580
MIRT018576	hsa-miR-335-5p	Homo sapiens	ITGB4	3691	Homo sapiens	Microarray	Functional MTI (Weak)	18185580
MIRT018577	hsa-miR-335-5p	Homo sapiens	ATP8A1	10396	Homo sapiens	Microarray	Functional MTI (Weak)	18185580
MIRT018578	hsa-miR-335-5p	Homo sapiens	PDE6G	5148	Homo sapiens	Microarray	Functional MTI (Weak)	18185580
MIRT018579	hsa-miR-335-5p	Homo sapiens	RTBDN	83546	Homo sapiens	Microarray	Functional MTI (Weak)	18185580
MIRT018580	hsa-miR-335-5p	Homo sapiens	ANKRD53	79998	Homo sapiens	Microarray	Functional MTI (Weak)	18185580
MIRT018581	hsa-miR-335-5p	Homo sapiens	TBC1D27	96597	Homo sapiens	Microarray	Functional MTI (Weak)	18185580
MIRT018582	hsa-miR-335-5p	Homo sapiens	RPS6KA2	6196	Homo sapiens	Microarray	Functional MTI (Weak)	18185580
MIRT018583	hsa-miR-335-5p	Homo sapiens	SIRT7	51547	Homo sapiens	Microarray	Functional MTI (Weak)	18185580
MIRT018584	hsa-miR-335-5p	Homo sapiens	RTN2	6253	Homo sapiens	Microarray	Functional MTI (Weak)	18185580
MIRT018585	hsa-miR-335-5p	Homo sapiens	OCLN	100506658	Homo sapiens	Microarray	Functional MTI (Weak)	18185580
MIRT018586	hsa-miR-335-5p	Homo sapiens	CDRT15L2	256223	Homo sapiens	Microarray	Functional MTI (Weak)	18185580
MIRT018587	hsa-miR-335-5p	Homo sapiens	CHL1	10752	Homo sapiens	Microarray	Functional MTI (Weak)	18185580
MIRT018588	hsa-miR-335-5p	Homo sapiens	SLC2A10	81031	Homo sapiens	Microarray	Functional MTI (Weak)	18185580
MIRT018589	hsa-miR-335-5p	Homo sapiens	ADSSL1	122622	Homo sapiens	Microarray	Functional MTI (Weak)	18185580
MIRT018590	hsa-miR-335-5p	Homo sapiens	FOXO4	4303	Homo sapiens	Microarray	Functional MTI (Weak)	18185580
MIRT018591	hsa-miR-335-5p	Homo sapiens	PIFO	128344	Homo sapiens	Microarray	Functional MTI (Weak)	18185580
MIRT018592	hsa-miR-335-5p	Homo sapiens	VTN	7448	Homo sapiens	Microarray	Functional MTI (Weak)	18185580
MIRT018593	hsa-miR-335-5p	Homo sapiens	SCARA5	286133	Homo sapiens	Microarray	Functional MTI (Weak)	18185580
MIRT018594	hsa-miR-335-5p	Homo sapiens	TRDC	28526	Homo sapiens	Microarray	Functional MTI (Weak)	18185580
MIRT018595	hsa-miR-335-5p	Homo sapiens	ARID3B	10620	Homo sapiens	Microarray	Functional MTI (Weak)	18185580
MIRT018596	hsa-miR-335-5p	Homo sapiens	RGPD2	729857	Homo sapiens	Microarray	Functional MTI (Weak)	18185580
MIRT018597	hsa-miR-335-5p	Homo sapiens	LSMEM2	132228	Homo sapiens	Microarray	Functional MTI (Weak)	18185580
MIRT018598	hsa-miR-335-5p	Homo sapiens	NT5C1A	84618	Homo sapiens	Microarray	Functional MTI (Weak)	18185580
MIRT018599	hsa-miR-335-5p	Homo sapiens	SLC1A1	6505	Homo sapiens	Microarray	Functional MTI (Weak)	18185580
MIRT018600	hsa-miR-335-5p	Homo sapiens	SEC14L3	266629	Homo sapiens	Microarray	Functional MTI (Weak)	18185580
MIRT018601	hsa-miR-335-5p	Homo sapiens	TF	7018	Homo sapiens	Microarray	Functional MTI (Weak)	18185580
MIRT018602	hsa-miR-335-5p	Homo sapiens	PTPRM	5797	Homo sapiens	Microarray	Functional MTI (Weak)	18185580
MIRT018603	hsa-miR-335-5p	Homo sapiens	ANKRD29	147463	Homo sapiens	Microarray	Functional MTI (Weak)	18185580
MIRT018604	hsa-miR-335-5p	Homo sapiens	C12orf60	144608	Homo sapiens	Microarray	Functional MTI (Weak)	18185580
MIRT018605	hsa-miR-335-5p	Homo sapiens	CXorf48	54967	Homo sapiens	Microarray	Functional MTI (Weak)	18185580
MIRT018606	hsa-miR-335-5p	Homo sapiens	ZDHHC11	79844	Homo sapiens	Microarray	Functional MTI (Weak)	18185580
MIRT018607	hsa-miR-335-5p	Homo sapiens	KIAA0430	9665	Homo sapiens	Microarray	Functional MTI (Weak)	18185580
MIRT018608	hsa-miR-335-5p	Homo sapiens	VAMP5	10791	Homo sapiens	Microarray	Functional MTI (Weak)	18185580
MIRT018609	hsa-miR-335-5p	Homo sapiens	MACF1	23499	Homo sapiens	Microarray	Functional MTI (Weak)	18185580
MIRT018610	hsa-miR-335-5p	Homo sapiens	SNX9	51429	Homo sapiens	Microarray	Functional MTI (Weak)	18185580
MIRT018611	hsa-miR-335-5p	Homo sapiens	LSS	4047	Homo sapiens	Microarray	Functional MTI (Weak)	18185580
MIRT018612	hsa-miR-335-5p	Homo sapiens	KDM5D	8284	Homo sapiens	Microarray	Functional MTI (Weak)	18185580
MIRT018613	hsa-miR-335-5p	Homo sapiens	ALDH8A1	64577	Homo sapiens	Microarray	Functional MTI (Weak)	18185580
MIRT018614	hsa-miR-335-5p	Homo sapiens	ANO1	55107	Homo sapiens	Microarray	Functional MTI (Weak)	18185580
MIRT018615	hsa-miR-335-5p	Homo sapiens	ATP7A	538	Homo sapiens	Microarray	Functional MTI (Weak)	18185580
MIRT018616	hsa-miR-335-5p	Homo sapiens	CCDC120	90060	Homo sapiens	Microarray	Functional MTI (Weak)	18185580
MIRT018617	hsa-miR-335-5p	Homo sapiens	SLC17A5	26503	Homo sapiens	Microarray	Functional MTI (Weak)	18185580
MIRT018618	hsa-miR-335-5p	Homo sapiens	SRGAP1	57522	Homo sapiens	Microarray	Functional MTI (Weak)	18185580
MIRT018619	hsa-miR-335-5p	Homo sapiens	EBF1	1879	Homo sapiens	Microarray	Functional MTI (Weak)	18185580
MIRT018620	hsa-miR-335-5p	Homo sapiens	FBLIM1	54751	Homo sapiens	Microarray	Functional MTI (Weak)	18185580
MIRT018621	hsa-miR-335-5p	Homo sapiens	TRIM29	23650	Homo sapiens	Microarray	Functional MTI (Weak)	18185580
MIRT018622	hsa-miR-335-5p	Homo sapiens	OLFML2A	169611	Homo sapiens	Microarray	Functional MTI (Weak)	18185580
MIRT018623	hsa-miR-335-5p	Homo sapiens	MGA	23269	Homo sapiens	Microarray	Functional MTI (Weak)	18185580
MIRT018624	hsa-miR-335-5p	Homo sapiens	HBP1	26959	Homo sapiens	Microarray	Functional MTI (Weak)	18185580
MIRT018625	hsa-miR-335-5p	Homo sapiens	ITIH1	3697	Homo sapiens	Microarray	Functional MTI (Weak)	18185580
MIRT018626	hsa-miR-335-5p	Homo sapiens	SERPINB9	5272	Homo sapiens	Microarray	Functional MTI (Weak)	18185580
MIRT018627	hsa-miR-335-5p	Homo sapiens	LCOR	84458	Homo sapiens	Microarray	Functional MTI (Weak)	18185580
MIRT018628	hsa-miR-335-5p	Homo sapiens	HSD11B1	3290	Homo sapiens	Microarray	Functional MTI (Weak)	18185580
MIRT018629	hsa-miR-335-5p	Homo sapiens	PDZD2	23037	Homo sapiens	Microarray	Functional MTI (Weak)	18185580
MIRT018630	hsa-miR-335-5p	Homo sapiens	FAM46C	54855	Homo sapiens	Microarray	Functional MTI (Weak)	18185580
MIRT018631	hsa-miR-335-5p	Homo sapiens	MARK4	57787	Homo sapiens	Microarray	Functional MTI (Weak)	18185580
MIRT018632	hsa-miR-335-5p	Homo sapiens	GRM5	2915	Homo sapiens	Microarray	Functional MTI (Weak)	18185580
MIRT018633	hsa-miR-335-5p	Homo sapiens	DUSP6	1848	Homo sapiens	Microarray	Functional MTI (Weak)	18185580
MIRT018634	hsa-miR-335-5p	Homo sapiens	ZDHHC20	253832	Homo sapiens	Microarray	Functional MTI (Weak)	18185580
MIRT018635	hsa-miR-335-5p	Homo sapiens	PLEKHA4	57664	Homo sapiens	Microarray	Functional MTI (Weak)	18185580
MIRT018636	hsa-miR-335-5p	Homo sapiens	PIWIL4	143689	Homo sapiens	Microarray	Functional MTI (Weak)	18185580
MIRT018637	hsa-miR-335-5p	Homo sapiens	NAB2	4665	Homo sapiens	Microarray	Functional MTI (Weak)	18185580
MIRT018638	hsa-miR-335-5p	Homo sapiens	ANXA1	301	Homo sapiens	Microarray	Functional MTI (Weak)	18185580
MIRT018639	hsa-miR-335-5p	Homo sapiens	DKK2	27123	Homo sapiens	Microarray	Functional MTI (Weak)	18185580
MIRT018640	hsa-miR-335-5p	Homo sapiens	LSMEM1	286006	Homo sapiens	Microarray	Functional MTI (Weak)	18185580
MIRT018641	hsa-miR-335-5p	Homo sapiens	UHRF2	115426	Homo sapiens	Microarray	Functional MTI (Weak)	18185580
MIRT018642	hsa-miR-335-5p	Homo sapiens	GCNT4	51301	Homo sapiens	Microarray	Functional MTI (Weak)	18185580
MIRT018643	hsa-miR-335-5p	Homo sapiens	CD177	57126	Homo sapiens	Microarray	Functional MTI (Weak)	18185580
MIRT018644	hsa-miR-335-5p	Homo sapiens	DOCK6	57572	Homo sapiens	Microarray	Functional MTI (Weak)	18185580
MIRT018645	hsa-miR-335-5p	Homo sapiens	MOCOS	55034	Homo sapiens	Microarray	Functional MTI (Weak)	18185580
MIRT018646	hsa-miR-335-5p	Homo sapiens	EEA1	8411	Homo sapiens	Microarray	Functional MTI (Weak)	18185580
MIRT018647	hsa-miR-335-5p	Homo sapiens	TRIM69	140691	Homo sapiens	Microarray	Functional MTI (Weak)	18185580
MIRT018648	hsa-miR-335-5p	Homo sapiens	MCHR2	84539	Homo sapiens	Microarray	Functional MTI (Weak)	18185580
MIRT018649	hsa-miR-335-5p	Homo sapiens	ZNF341	84905	Homo sapiens	Microarray	Functional MTI (Weak)	18185580
MIRT018650	hsa-miR-335-5p	Homo sapiens	PXN	5829	Homo sapiens	Microarray	Functional MTI (Weak)	18185580
MIRT018651	hsa-miR-335-5p	Homo sapiens	RAB6A	5870	Homo sapiens	Microarray	Functional MTI (Weak)	18185580
MIRT018652	hsa-miR-335-5p	Homo sapiens	GJB1	2705	Homo sapiens	Microarray	Functional MTI (Weak)	18185580
MIRT018653	hsa-miR-335-5p	Homo sapiens	FKBP14	55033	Homo sapiens	Microarray	Functional MTI (Weak)	18185580
MIRT018654	hsa-miR-335-5p	Homo sapiens	PNPLA6	10908	Homo sapiens	Microarray	Functional MTI (Weak)	18185580
MIRT018655	hsa-miR-335-5p	Homo sapiens	KIAA0825	285600	Homo sapiens	Microarray	Functional MTI (Weak)	18185580
MIRT018656	hsa-miR-335-5p	Homo sapiens	SCN3B	55800	Homo sapiens	Microarray	Functional MTI (Weak)	18185580
MIRT018657	hsa-miR-335-5p	Homo sapiens	CXorf27	25763	Homo sapiens	Microarray	Functional MTI (Weak)	18185580
MIRT018658	hsa-miR-335-5p	Homo sapiens	EFCAB13	124989	Homo sapiens	Microarray	Functional MTI (Weak)	18185580
MIRT018659	hsa-miR-335-5p	Homo sapiens	NUP210	23225	Homo sapiens	Microarray	Functional MTI (Weak)	18185580
MIRT018660	hsa-miR-335-5p	Homo sapiens	SNORD114-10	767588	Homo sapiens	Microarray	Functional MTI (Weak)	18185580
MIRT018661	hsa-miR-335-5p	Homo sapiens	GTSF1L	149699	Homo sapiens	Microarray	Functional MTI (Weak)	18185580
MIRT018662	hsa-miR-335-5p	Homo sapiens	CHI3L2	1117	Homo sapiens	Microarray	Functional MTI (Weak)	18185580
MIRT018663	hsa-miR-335-5p	Homo sapiens	ITGB6	3694	Homo sapiens	Microarray	Functional MTI (Weak)	18185580
MIRT018664	hsa-miR-335-5p	Homo sapiens	HERPUD1	9709	Homo sapiens	Microarray	Functional MTI (Weak)	18185580
MIRT018665	hsa-miR-335-5p	Homo sapiens	FAM198B	51313	Homo sapiens	Microarray	Functional MTI (Weak)	18185580
MIRT018666	hsa-miR-335-5p	Homo sapiens	SPRED1	161742	Homo sapiens	Microarray	Functional MTI (Weak)	18185580
MIRT018667	hsa-miR-335-5p	Homo sapiens	MPND	84954	Homo sapiens	Microarray	Functional MTI (Weak)	18185580
MIRT018668	hsa-miR-335-5p	Homo sapiens	TTLL13	440307	Homo sapiens	Microarray	Functional MTI (Weak)	18185580
MIRT018669	hsa-miR-335-5p	Homo sapiens	INSM2	84684	Homo sapiens	Microarray	Functional MTI (Weak)	18185580
MIRT018670	hsa-miR-335-5p	Homo sapiens	CDX2	1045	Homo sapiens	Microarray	Functional MTI (Weak)	18185580
MIRT018671	hsa-miR-335-5p	Homo sapiens	NKTR	4820	Homo sapiens	Microarray	Functional MTI (Weak)	18185580
MIRT018672	hsa-miR-335-5p	Homo sapiens	GAB3	139716	Homo sapiens	Microarray	Functional MTI (Weak)	18185580
MIRT018673	hsa-miR-335-5p	Homo sapiens	RP1	6101	Homo sapiens	Microarray	Functional MTI (Weak)	18185580
MIRT018674	hsa-miR-335-5p	Homo sapiens	KLF9	687	Homo sapiens	Microarray	Functional MTI (Weak)	18185580
MIRT018675	hsa-miR-335-5p	Homo sapiens	SGCD	6444	Homo sapiens	Microarray	Functional MTI (Weak)	18185580
MIRT018676	hsa-miR-335-5p	Homo sapiens	LMBRD2	92255	Homo sapiens	Microarray	Functional MTI (Weak)	18185580
MIRT018677	hsa-miR-335-5p	Homo sapiens	PTPN14	5784	Homo sapiens	Microarray	Functional MTI (Weak)	18185580
MIRT018678	hsa-miR-335-5p	Homo sapiens	GIPC2	54810	Homo sapiens	Microarray	Functional MTI (Weak)	18185580
MIRT018679	hsa-miR-335-5p	Homo sapiens	ESX1	80712	Homo sapiens	Microarray	Functional MTI (Weak)	18185580
[truncated: 548 more rows]

## Sheet: miR-335 WNT targets for 335
			Organism: Homo sapiens
			Annotations enriched: (KEGG) 04310: Wnt signaling pathway
			Genes related:
			PRICKLE2	Prickle homolog 2 (Drosophila) [Source:HGNC Symbol;Acc:20340]
			WNT9A	Wingless-type MMTV integration site family, member 9A [Source:HGNC Symbol;Acc:12778]
			LRP5	Low density lipoprotein receptor-related protein 5 [Source:HGNC Symbol;Acc:6697]
			WNT7B	Wingless-type MMTV integration site family, member 7B [Source:HGNC Symbol;Acc:12787]
			AXIN1	Axin 1 [Source:HGNC Symbol;Acc:903]
			PPP3R2	Protein phosphatase 3, regulatory subunit B, beta [Source:HGNC Symbol;Acc:9318]
			PRKCG	Protein kinase C, gamma [Source:HGNC Symbol;Acc:9402]
			CCND2	Cyclin D2 [Source:HGNC Symbol;Acc:1583]
			PPP2R5A	Protein phosphatase 2, regulatory subunit B', alpha [Source:HGNC Symbol;Acc:9309]
			DKK2	Dickkopf homolog 2 (Xenopus laevis) [Source:HGNC Symbol;Acc:2892]
			DKK4	Dickkopf homolog 4 (Xenopus laevis) [Source:HGNC Symbol;Acc:2894]
			FZD1	Frizzled family receptor 1 [Source:HGNC Symbol;Acc:4038]
			LRP6	Low density lipoprotein receptor-related protein 6 [Source:HGNC Symbol;Acc:6698]
			SFRP1	Secreted frizzled-related protein 1 [Source:HGNC Symbol;Acc:10776]
			VANGL2	Vang-like 2 (van gogh, Drosophila) [Source:HGNC Symbol;Acc:15511]
			WNT10B	Wingless-type MMTV integration site family, member 10B [Source:HGNC Symbol;Acc:12775]
			MYC	V-myc myelocytomatosis viral oncogene homolog (avian) [Source:HGNC Symbol;Acc:7553]
			FZD8	Frizzled family receptor 8 [Source:HGNC Symbol;Acc:4046]
			CTNNBIP1	Catenin, beta interacting protein 1 [Source:HGNC Symbol;Acc:16913]
			NFAT5	Nuclear factor of activated T-cells 5, tonicity-responsive [Source:HGNC Symbol;Acc:7774]
			SMAD3	SMAD family member 3 [Source:HGNC Symbol;Acc:6769]
			WNT3	Wingless-type MMTV integration site family, member 3 [Source:HGNC Symbol;Acc:12782]
			TBL1X	Transducin (beta)-like 1X-linked [Source:HGNC Symbol;Acc:11585]
			FZD10	Frizzled family receptor 10 [Source:HGNC Symbol;Acc:4039]
			WIF1	WNT inhibitory factor 1 [Source:HGNC Symbol;Acc:18081]
			DAAM1	Dishevelled associated activator of morphogenesis 1 [Source:HGNC Symbol;Acc:18142]
